# Supplementary material for: Backbone-Determined Antiarrhythmic Structure–Activity Relationships for a Mirror Image, Oligomeric Depsipeptide Natural Product
Source: PubMed Central journal article supplement (PMC11284792; doi:10.1021/acs.jmedchem.4c00923), 2024-07-03

**Backbone-Determined Antiarrhythmic Structure-Activity Relationships for a Mirror-Image, Oligomeric Depsipeptide Natural Product**

Madelaine P. Thorpe,<sup>1</sup> Daniel J. Blackwell,<sup>2</sup> Bjorn C. Knollmann,<sup>2</sup> and Jeffrey N. Johnston<sup>1\*</sup>

<sup>1</sup>Department of Chemistry and Vanderbilt Institute of Chemical Biology, Vanderbilt University, Nashville, Tennessee 37235

<sup>2</sup>Department of Medicine, Vanderbilt University Medical Center, Nashville, TN 37235

|                                                                                                                                                                               |           |
|-------------------------------------------------------------------------------------------------------------------------------------------------------------------------------|-----------|
| Table of Contents                                                                                                                                                             | SI-X      |
| <b>Experimental Section</b> .....                                                                                                                                             | <b>9</b>  |
| <b>General Information</b> .....                                                                                                                                              | <b>9</b>  |
| <b>Purity Statement</b> .....                                                                                                                                                 | <b>9</b>  |
| <b>Biological Experiments</b> .....                                                                                                                                           | <b>9</b>  |
| Biological Experiment Data: Calcium spark parameters.....                                                                                                                     | 10        |
| <b>General Procedures</b> .....                                                                                                                                               | <b>11</b> |
| <b><i>tert</i>-Butyloxycarbonyl (Boc) Deprotection</b> .....                                                                                                                  | <b>11</b> |
| <b>Benzyl Deprotection</b> .....                                                                                                                                              | <b>11</b> |
| <b>PyBrop Coupling Reaction</b> .....                                                                                                                                         | <b>11</b> |
| <b>PyBOP Macrocyclization</b> .....                                                                                                                                           | <b>11</b> |
| <b>HATU Coupling Reaction</b> .....                                                                                                                                           | <b>12</b> |
| <b>General Reaction Schemes</b> .....                                                                                                                                         | <b>12</b> |
| <b>Experimental Procedures and Characterization Data for Reported Compounds</b> .....                                                                                         | <b>13</b> |
| 1-Tosylhexan-1-amine (14).....                                                                                                                                                | 13        |
| <i>tert</i> -Butyl ((2 <i>S</i> )-1-bromo-1-nitroheptan-2-yl)carbamate (16).....                                                                                              | 13        |
| Benzyl (S)-2-(( <i>tert</i> -butoxycarbonyl)amino)heptanoate (19).....                                                                                                        | 14        |
| Benzyl (S)-2-(( <i>tert</i> -butoxycarbonyl)(methyl)amino)heptanoate (21).....                                                                                                | 14        |
| Benzyl (S)-2-((( <i>tert</i> -butoxycarbonyl)- <i>D</i> -alanyl)oxy)heptanoate (23).....                                                                                      | 15        |
| Benzyl (S)-2-(( <i>R</i> )-2-(( <i>tert</i> -butoxycarbonyl)amino)- <i>N</i> -methylpropanamido)heptanoate (29).....                                                          | 15        |
| Benzyl (S)-2-(( <i>R</i> )-2-(( <i>tert</i> -butoxycarbonyl)(methyl)amino)propanamido)heptanoate (32).....                                                                    | 16        |
| Benzyl (S)-2-(( <i>R</i> )-2-(( <i>tert</i> -butoxycarbonyl)(methyl)amino)- <i>N</i> -methylpropanamido)heptanoate (35).....                                                  | 16        |
| Benzyl (S)-2-(((6 <i>R</i> ,9 <i>R</i> ,12 <i>R</i> )-2,2,5,6,11,12-hexamethyl-4,7,10-trioxo-9-pentyl-3,8-dioxa-5,11-diazatridecan-13-oyl)oxy)heptanoate (T38).....           | 17        |
| (S)-1-(benzyloxy)-1-oxoheptan-2-yl (6 <i>R</i> ,9 <i>S</i> ,12 <i>R</i> )-2,2,5,6,11,12-hexamethyl-4,7,10-trioxo-9-pentyl-3-oxa-5,8,11-triazatridecan-13-oate (T40).....      | 17        |
| Benzyl (S)-2-(((6 <i>R</i> ,9 <i>S</i> ,12 <i>R</i> )- <i>N</i> ,2,2,5,6,11,12-heptamethyl-4,7,10-trioxo-9-pentyl-3,8-dioxa-5,11-diazatridecan-13-amido)heptanoate (T41)..... | 18        |

|                                                                                                                                                                                                                                                       |    |
|-------------------------------------------------------------------------------------------------------------------------------------------------------------------------------------------------------------------------------------------------------|----|
| Benzyl (6R,9S,12R,15S)-2,2,5,6,8,11,12,14-octamethyl-4,7,10,13-tetraoxo-9,15-dipentyl-3-oxa-5,8,11,14-tetraazahexadecan-16-oate (T42).....                                                                                                            | 18 |
| Benzyl (6R,9S,12R,15S)-2,2,5,6,8,12,14-heptamethyl-4,7,10,13-tetraoxo-9,15-dipentyl-3-oxa-5,8,11,14-tetraazahexadecan-16-oate (T43).....                                                                                                              | 19 |
| Benzyl (6R,9S,12R,15S)-2,2,6,8,12,14-hexamethyl-4,7,10,13-tetraoxo-9,15-dipentyl-3-oxa-5,8,11,14-tetraazahexadecan-16-oate (T44).....                                                                                                                 | 19 |
| Benzyl (6R,9S,12R,15S)-2,2,6,8,11,12,14-heptamethyl-4,7,10,13-tetraoxo-9,15-dipentyl-3-oxa-5,8,11,14-tetraazahexadecan-16-oate (T45).....                                                                                                             | 20 |
| Benzyl (6R,9S,12R,15S)-2,2,5,6,11,12-hexamethyl-4,7,10,13-tetraoxo-9,15-dipentyl-3-oxa-5,8,11,14-tetraazahexadecan-16-oate (T46).....                                                                                                                 | 20 |
| Benzyl (6R,9S,12R,15S)-2,2,5,6,8,11,12-heptamethyl-4,7,10,13-tetraoxo-9,15-dipentyl-3-oxa-5,8,11,14-tetraazahexadecan-16-oate (T47).....                                                                                                              | 21 |
| Benzyl (S)-2-(((6R,9S,12R,15S,18R,21S,24R)-2,2,6,11,12,17,18,23,24-nonamethyl-4,7,10,13,16,19,22-heptaaxo-9,15,21-tripentyl-3,8,14,20-tetraoxa-5,11,17,23-tetraazapentacosan-25-oyl)oxy)heptanoate (O49).....                                         | 21 |
| Benzyl (S)-2-(((6R,9S,12R,15S,18R,21S,24R)-2,2,5,6,11,12,18,24-octamethyl-4,7,10,13,16,19,22-heptaaxo-9,15,21-tripentyl-3,8,14,20-tetraoxa-5,11,17,23-tetraazapentacosan-25-oyl)oxy)heptanoate (O50).....                                             | 22 |
| Benzyl (S)-2-(((6R,9S,12R,15S,18R)-2,2,6,12,18-pentamethyl-4,7,10,13,16-pentaaxo-9,15-dipentyl-3,8,14-trioxa-5,11,17-triazanonadecan-19-oyl)oxy)heptanoate (H51).....                                                                                 | 23 |
| Benzyl (S)-2-(((6R,9S,12R,15S,18R,21S,24R)-2,2,5,6,12,18,24-heptamethyl-4,7,10,13,16,19,22-heptaaxo-9,15,21-tripentyl-3,8,14,20-tetraoxa-5,11,17,23-tetraazapentacosan-25-oyl)oxy)heptanoate (O52).....                                               | 23 |
| (4S,7R,10S,13R,16S)-7,8,13,14-tetramethyl-3,6,9,12,15-pentaaxo-4,10-dipentyl-1-phenyl-2,5,11-trioxa-8,14-diazahenicosan-16-yl (6R,9S,12R)-2,2,5,6,11,12-hexamethyl-4,7,10-trioxa-9-pentyl-3-oxa-5,8,11-triazatridecan-13-oate (O54).....              | 24 |
| (S)-1-(((R)-1-(((S)-1-(benzyloxy)-1-oxoheptan-2-yl)oxy)-1-oxopropan-2-yl)(methyl)amino)-1-oxoheptan-2-yl (6R,9S,12R,15S,18R)-2,2,5,6,11,12,17,18-octamethyl-4,7,10,13,16-pentaaxo-9,15-dipentyl-3-oxa-5,8,11,14,17-pentaazonadecan-19-oate (O55)..... | 25 |
| (4S,7R,10S,13R,16S)-7,8,13,14-tetramethyl-3,6,9,12,15-pentaaxo-4,10-dipentyl-1-phenyl-2,5-dioxa-8,11,14-triazahenicosan-16-yl (6R,9S,12R)-2,2,5,6,11,12-hexamethyl-4,7,10-trioxa-9-pentyl-3-oxa-5,8,11-triazatridecan-13-oate (O56).....              | 25 |
| Benzyl (6R,9S,12R,15S,18R,21S)-2,2,5,6,11,12,17,18-octamethyl-4,7,10,13,16,19-hexaaxo-9,15,21-tripentyl-3-oxa-5,8,11,14,17,20-hexaazadocosan-22-oate (H57).....                                                                                       | 26 |
| Benzyl (2S,5R,8S,11R,14S,17R,20S)-5,6,11,12,17,18-hexamethyl-20-((methyl-D-alanyl)oxy)-4,7,10,13,16,19-hexaaxo-2,8,14-tripentyl-3,6,9,12,15,18-hexaazapentacosanoate (O58, Boc-protected).....                                                        | 27 |
| Benzyl (6R,9S,12R,15S,18R,21S,24R,27S)-2,2,5,6,11,12,17,18,23,24-decamethyl-4,7,10,13,16,19,22,25-octaaxo-9,15,21,27-tetrapentyl-3-oxa-5,8,11,14,17,20,23,26-octaazaotacosan-28-oate (O59).....                                                       | 28 |
| Benzyl (4S,7R,10S,13R,16S)-7,8,13,14-tetramethyl-3,6,9,12,15-pentaaxo-4,10-dipentyl-1-phenyl-2,5,11-trioxa-8,14-diazahenicosan-16-yl (6R,9S,12R)-2,2,5,6,8,11,12-heptamethyl-4,7,10-trioxa-9-pentyl-3-oxa-5,8,11-triazatridecan-13-oate (O60).....    | 28 |
| Benzyl (2S,5R,8S,11R,14S)-14-(((6R,9S,12R)-2,2,5,6,11,12-hexamethyl-4,7,10-trioxa-9-pentyl-3,8-dioxa-5,11-diazatridecan-13-oyl)oxy)-3,5,6,9,11,12-hexamethyl-4,7,10,13-tetraoxo-2,8-dipentyl-3,6,9,12-tetraazanadecanoate (O61).....                  | 29 |
| Benzyl (S)-2-(((6R,9S,12R,15S,18R,21S,24R)-N,2,2,5,6,11,12,14,17,18,23,24-dodecamethyl-4,7,10,13,16,19,22-heptaaxo-9,15,21-tripentyl-3,8,20-trioxa-5,11,14,17,23-pentaazapentacosan-25-amido)heptanoate (O62).....                                    | 30 |

|                                                                                                                                                                                                                               |    |
|-------------------------------------------------------------------------------------------------------------------------------------------------------------------------------------------------------------------------------|----|
| Benzyl (6R,9S,12R,15S,18R,21S)-2,2,5,6,8,11,12,14,17,18,20-undecamethyl-4,7,10,13,16,19-hexaoxo-9,15,21-tripentyl-3-oxa-5,8,11,14,17,20-hexaazadocosan-22-oate (H63). .....                                                   | 30 |
| (S)-1-(benzyloxy)-1-oxoheptan-2-yl (6R,9S,12R,15S,18R,21S,24R)-2,2,5,6,8,11,12,14,17,18,20,23,24-tridecamethyl-4,7,10,13,16,19,22-heptaoxo-9,15,21-tripentyl-3-oxa-5,8,11,14,17,20,23-heptaazapentacosan-25-oate (O64). ..... | 31 |
| Benzyl (6R,9S,12R,15S,18R,21S,24R,27S)-2,2,5,6,8,11,12,14,17,18,20,23,24,26-tetradecamethyl-4,7,10,13,16,19,22,25-octaoxo-9,15,21,27-tetrapentyl-3-oxa-5,8,11,14,17,20,23,26-octaazaotacosan-28-oate (O65). .....             | 32 |
| Benzyl (6R,9S,12R,15S,18R,21S,24R,27S)-2,2,6,8,11,12,14,17,18,20,23,24,26-tridecamethyl-4,7,10,13,16,19,22,25-octaoxo-9,15,21,27-tetrapentyl-3-oxa-5,8,11,14,17,20,23,26-octaazaotacosan-28-oate (O66). .....                 | 33 |
| Benzyl (6R,9S,12R,15S,18R,21S,24R,27S)-2,2,5,6,8,11,12,14,18,20,24,26-dodecamethyl-4,7,10,13,16,19,22,25-octaoxo-9,15,21,27-tetrapentyl-3-oxa-5,8,11,14,17,20,23,26-octaazaotacosan-28-oate (O67). .....                      | 34 |
| Benzyl (6R,9S,12R,15S,18R,21S,24R,27S)-2,2,5,6,8,12,14,17,18,20,24,26-dodecamethyl-4,7,10,13,16,19,22,25-octaoxo-9,15,21,27-tetrapentyl-3-oxa-5,8,11,14,17,20,23,26-octaazaotacosan-28-oate (O68). .....                      | 35 |
| Benzyl (6R,9S,12R,15S,18R,21S,24R,27S)-2,2,5,6,8,12,14,18,20,24,26-undecamethyl-4,7,10,13,16,19,22,25-octaoxo-9,15,21,27-tetrapentyl-3-oxa-5,8,11,14,17,20,23,26-octaazaotacosan-28-oate (O69). .....                         | 36 |
| Benzyl (6R,9S,12R,15S,18R,21S,24R,27S)-2,2,6,8,12,14,18,20,24,26-decamethyl-4,7,10,13,16,19,22,25-octaoxo-9,15,21,27-tetrapentyl-3-oxa-5,8,11,14,17,20,23,26-octaazaotacosan-28-oate (O70). .....                             | 37 |
| Benzyl (6R,9S,12R,15S,18R,21S,24R,27S)-2,2,5,6,8,11,12,14,17,18,20,23,24-tridecamethyl-4,7,10,13,16,19,22,25-octaoxo-9,15,21,27-tetrapentyl-3-oxa-5,8,11,14,17,20,23,26-octaazaotacosan-28-oate (O71). .....                  | 37 |
| Benzyl (6R,9S,12R,15S,18R,21S,24R,27S)-2,2,5,6,8,11,12,14,17,18,23,24-dodecamethyl-4,7,10,13,16,19,22,25-octaoxo-9,15,21,27-tetrapentyl-3-oxa-5,8,11,14,17,20,23,26-octaazaotacosan-28-oate (O72). .....                      | 38 |
| Benzyl (6R,9S,12R,15S,18R,21S,24R,27S)-2,2,5,6,8,11,12,17,18,20,23,24-dodecamethyl-4,7,10,13,16,19,22,25-octaoxo-9,15,21,27-tetrapentyl-3-oxa-5,8,11,14,17,20,23,26-octaazaotacosan-28-oate (O73). .....                      | 39 |
| Benzyl (6R,9S,12R,15S,18R,21S,24R,27S)-2,2,5,6,8,11,12,17,18,23,24-undecamethyl-4,7,10,13,16,19,22,25-octaoxo-9,15,21,27-tetrapentyl-3-oxa-5,8,11,14,17,20,23,26-octaazaotacosan-28-oate (O74). .....                         | 40 |
| (3R,6S,9R,12S,15R,18S,21R,24S)-3,4,9,10,15,16,21-heptamethyl-6,12,18,24-tetrapentyl-1,7,13,19-tetraoxa-4,10,16,22-tetraazacyclotetracosan-2,5,8,11,14,17,20,23-octaone (1.1). .....                                           | 40 |
| (3R,6S,9R,12S,15R,18S,21R,24S)-3,4,9,10,15,21-hexamethyl-6,12,18,24-tetrapentyl-1,7,13,19-tetraoxa-4,10,16,22-tetraazacyclotetracosan-2,5,8,11,14,17,20,23-octaone (1.2). .....                                               | 41 |
| (3R,6S,9R,12S,15R,18S,21R,24S)-3,4,9,15,16,21-hexamethyl-6,12,18,24-tetrapentyl-1,7,13,19-tetraoxa-4,10,16,22-tetraazacyclotetracosan-2,5,8,11,14,17,20,23-octaone (1.3). .....                                               | 42 |
| (3R,6S,9R,12S,15R,18S,21R,24S)-3,4,9,15,21-pentamethyl-6,12,18,24-tetrapentyl-1,7,13,19-tetraoxa-4,10,16,22-tetraazacyclotetracosan-2,5,8,11,14,17,20,23-octaone (1.4). .....                                                 | 42 |
| (3R,6S,9R,12S,15R,18S,21R,24S)-3,4,9,10,15,16,21,22-octamethyl-6,12,18,24-tetrapentyl-1,7,13-trioxa-4,10,16,19,22-pentaazacyclotetracosan-2,5,8,11,14,17,20,23-octaone (2.1). .....                                           | 43 |
| (3R,6S,9R,12S,15R,18S,21R,24S)-3,4,9,10,15,16,21,22-octamethyl-6,12,18,24-tetrapentyl-1,7,13-trioxa-4,10,16,19,22-pentaazacyclotetracosan-2,5,8,11,14,17,20,23-octaone (2.2). .....                                           | 44 |
| (3R,6S,9R,12S,15R,18S,21R,24S)-3,4,9,10,15,16,21,22-octamethyl-6,12,18,24-tetrapentyl-1,13-dioxa-4,7,10,16,19,22-hexaazacyclotetracosan-2,5,8,11,14,17,20,23-octaone (2.3). .....                                             | 45 |
| (3R,6S,9R,12S,15R,18S,21R,24S)-3,4,9,10,15,16,21,22-octamethyl-6,12,18,24-tetrapentyl-1-oxa-4,7,10,13,16,19,22-heptaazacyclotetracosan-2,5,8,11,14,17,20,23-octaone (2.4). .....                                              | 45 |
| (3S,6R,9S,12R,15S,18R,21S,24R)-1,6,7,12,13,18,19,24-octamethyl-3,9,15,21-tetrapentyl-1,4,7,10,13,16,19,22-octaazacyclotetracosan-2,5,8,11,14,17,20,23-octaone (2.5). .....                                                    | 46 |

|                                                                                                                                                                                          |           |
|------------------------------------------------------------------------------------------------------------------------------------------------------------------------------------------|-----------|
| (3R,6S,9R,12S,15R,18S,21R,24S)-3,4,9,10,15,16,19,21,22-nonamethyl-6,12,18,24-tetrapentyl-1,7,13-trioxa-4,10,16,19,22-pentaazacyclotetracosan-2,5,8,11,14,17,20,23-octaone (3.1).....     | 47        |
| (3R,6S,9R,12S,15R,18S,21R,24S)-3,4,9,10,13,15,16,19,21,22-decamethyl-6,12,18,24-tetrapentyl-1,7-dioxa-4,10,13,16,19,22-hexaazacyclotetracosan-2,5,8,11,14,17,20,23-octaone (3.2).....    | 47        |
| (3R,6S,9R,12S,15R,18S,21R,24S)-3,4,7,9,10,15,16,19,21,22-decamethyl-6,12,18,24-tetrapentyl-1,13-dioxa-4,7,10,16,19,22-hexaazacyclotetracosan-2,5,8,11,14,17,20,23-octaone (3.3).....     | 48        |
| (3R,6S,9R,12S,15R,18S,21R,24S)-3,4,7,9,10,13,15,16,19,21,22-undecamethyl-6,12,18,24-tetrapentyl-1-oxa-4,7,10,13,16,19,22-heptaazacyclotetracosan-2,5,8,11,14,17,20,23-octaone (3.4)..... | 49        |
| (3R,6S,9R,12S,15R,18S,21R,24S)-1,3,4,7,9,10,13,15,16,19,21,22-dodecamethyl-6,12,18,24-tetrapentyl-1,4,7,10,13,16,19,22-octaazacyclotetracosan-2,5,8,11,14,17,20,23-octaone (3.5).....    | 49        |
| (3R,6S,9R,12S,15R,18S,21R,24S)-1,3,4,7,9,10,13,15,16,19,21-undecamethyl-6,12,18,24-tetrapentyl-1,4,7,10,13,16,19,22-octaazacyclotetracosan-2,5,8,11,14,17,20,23-octaone (4.2).....       | 50        |
| (3R,6S,9R,12S,15R,18S,21R,24S)-1,3,4,7,9,10,13,15,19,21-decamethyl-6,12,18,24-tetrapentyl-1,4,7,10,13,16,19,22-octaazacyclotetracosan-2,5,8,11,14,17,20,23-octaone (4.3).....            | 51        |
| (3R,6S,9R,12S,15R,18S,21R,24S)-1,3,4,7,9,10,13,15,19,21-decamethyl-6,12,18,24-tetrapentyl-1,4,7,10,13,16,19,22-octaazacyclotetracosan-2,5,8,11,14,17,20,23-octaone (4.4).....            | 51        |
| (3R,6S,9R,12S,15R,18S,21R,24S)-1,3,4,7,9,13,15,19,21-nonamethyl-6,12,18,24-tetrapentyl-1,4,7,10,13,16,19,22-octaazacyclotetracosan-2,5,8,11,14,17,20,23-octaone (4.5).....               | 52        |
| (3R,6S,9R,12S,15R,18S,21R,24S)-1,3,7,9,13,15,19,21-octamethyl-6,12,18,24-tetrapentyl-1,4,7,10,13,16,19,22-octaazacyclotetracosan-2,5,8,11,14,17,20,23-octaone (4.6).....                 | 53        |
| (3S,6R,9S,12R,15S,18R,21S,24R)-1,4,6,7,10,12,13,16,18,19,24-undecamethyl-3,9,15,21-tetrapentyl-1,4,7,10,13,16,19,22-octaazacyclotetracosan-2,5,8,11,14,17,20,23-octaone (5.2).....       | 53        |
| (3S,6R,9S,12R,15S,18R,21S,24R)-1,4,6,7,10,12,13,18,19,24-decamethyl-3,9,15,21-tetrapentyl-1,4,7,10,13,16,19,22-octaazacyclotetracosan-2,5,8,11,14,17,20,23-octaone (5.3).....            | 54        |
| (3S,6R,9S,12R,15S,18R,21S,24R)-1,4,6,7,12,13,16,18,19,24-decamethyl-3,9,15,21-tetrapentyl-1,4,7,10,13,16,19,22-octaazacyclotetracosan-2,5,8,11,14,17,20,23-octaone (5.4).....            | 55        |
| (3S,6R,9S,12R,15S,18R,21S,24R)-1,4,6,7,12,13,18,19,24-nonamethyl-3,9,15,21-tetrapentyl-1,4,7,10,13,16,19,22-octaazacyclotetracosan-2,5,8,11,14,17,20,23-octaone (5.5).....               | 55        |
| <b>Characterization NMR Spectra.....</b>                                                                                                                                                 | <b>57</b> |
| Figure S1. <sup>1</sup> H NMR (600 MHz, CDCl <sub>3</sub> ) of 14.....                                                                                                                   | 57        |
| Figure S2. <sup>13</sup> C NMR (150 MHz, CDCl <sub>3</sub> ) of 14.....                                                                                                                  | 58        |
| Figure S3. <sup>1</sup> H NMR (600 MHz, CDCl <sub>3</sub> ) of 16.....                                                                                                                   | 59        |
| Figure S4. <sup>13</sup> C NMR (150 MHz, CDCl <sub>3</sub> ) of 16.....                                                                                                                  | 60        |
| Figure S5. <sup>1</sup> H NMR (600 MHz, CDCl <sub>3</sub> ) of 19.....                                                                                                                   | 61        |
| Figure S6. <sup>13</sup> C NMR (150 MHz, CDCl <sub>3</sub> ) of 19.....                                                                                                                  | 62        |
| Figure S7. <sup>1</sup> H NMR (600 MHz, CDCl <sub>3</sub> ) of 21.....                                                                                                                   | 63        |
| Figure S8. <sup>13</sup> C NMR (150 MHz, CDCl <sub>3</sub> ) of 21.....                                                                                                                  | 64        |
| Figure S9. <sup>1</sup> H NMR (600 MHz, CDCl <sub>3</sub> ) of 23.....                                                                                                                   | 65        |
| Figure S10. <sup>13</sup> C NMR (150 MHz, CDCl <sub>3</sub> ) of 23.....                                                                                                                 | 66        |

|                                                                          |     |
|--------------------------------------------------------------------------|-----|
| Figure S11. $^1\text{H}$ NMR (600 MHz, $\text{CDCl}_3$ ) of 29 .....     | 67  |
| Figure S12. $^{13}\text{C}$ NMR (150 MHz, $\text{CDCl}_3$ ) of 29 .....  | 68  |
| Figure S13. $^1\text{H}$ NMR (600 MHz, $\text{CDCl}_3$ ) of 32 .....     | 69  |
| Figure S14. $^{13}\text{C}$ NMR (150 MHz, $\text{CDCl}_3$ ) of 32 .....  | 70  |
| Figure S15. $^1\text{H}$ NMR (600 MHz, $\text{CDCl}_3$ ) of 35 .....     | 71  |
| Figure S16. $^{13}\text{C}$ NMR (150 MHz, $\text{CDCl}_3$ ) of 35 .....  | 72  |
| Figure S17. $^1\text{H}$ NMR (600 MHz, $\text{CDCl}_3$ ) of T38 .....    | 73  |
| Figure S18. $^{13}\text{C}$ NMR (150 MHz, $\text{CDCl}_3$ ) of T38 ..... | 74  |
| Figure S19. $^1\text{H}$ NMR (600 MHz, $\text{CDCl}_3$ ) of T40 .....    | 75  |
| Figure S20. $^{13}\text{C}$ NMR (150 MHz, $\text{CDCl}_3$ ) of T40 ..... | 76  |
| Figure S21. $^1\text{H}$ NMR (600 MHz, $\text{CDCl}_3$ ) of T41 .....    | 77  |
| Figure S22. $^{13}\text{C}$ NMR (150 MHz, $\text{CDCl}_3$ ) of T41 ..... | 78  |
| Figure S23. $^1\text{H}$ NMR (600 MHz, $\text{CDCl}_3$ ) of T42 .....    | 79  |
| Figure S24. $^{13}\text{C}$ NMR (150 MHz, $\text{CDCl}_3$ ) of T42 ..... | 80  |
| Figure S25. $^1\text{H}$ NMR (600 MHz, $\text{CDCl}_3$ ) of T43 .....    | 81  |
| Figure S26. $^{13}\text{C}$ NMR (150 MHz, $\text{CDCl}_3$ ) of T43 ..... | 82  |
| Figure S27. $^1\text{H}$ NMR (600 MHz, $\text{CDCl}_3$ ) of T44 .....    | 83  |
| Figure S28. $^{13}\text{C}$ NMR (150 MHz, $\text{CDCl}_3$ ) of T44 ..... | 84  |
| Figure S29. $^1\text{H}$ NMR (600 MHz, $\text{CDCl}_3$ ) of T45 .....    | 85  |
| Figure S30. $^{13}\text{C}$ NMR (150 MHz, $\text{CDCl}_3$ ) of T45 ..... | 86  |
| Figure S31. $^1\text{H}$ NMR (600 MHz, $\text{CDCl}_3$ ) of T46 .....    | 87  |
| Figure S32. $^{13}\text{C}$ NMR (150 MHz, $\text{CDCl}_3$ ) of T46 ..... | 88  |
| Figure S33. $^1\text{H}$ NMR (600 MHz, $\text{CDCl}_3$ ) of T47 .....    | 89  |
| Figure S34. $^{13}\text{C}$ NMR (150 MHz, $\text{CDCl}_3$ ) of T47 ..... | 90  |
| Figure S35. $^1\text{H}$ NMR (600 MHz, $\text{CDCl}_3$ ) of O49 .....    | 91  |
| Figure S36. $^{13}\text{C}$ NMR (150 MHz, $\text{CDCl}_3$ ) of O49 ..... | 92  |
| Figure S37. $^1\text{H}$ NMR (600 MHz, $\text{CDCl}_3$ ) of O50 .....    | 93  |
| Figure S38. $^{13}\text{C}$ NMR (150 MHz, $\text{CDCl}_3$ ) of O50 ..... | 94  |
| Figure S39. $^1\text{H}$ NMR (600 MHz, $\text{CDCl}_3$ ) of H51 .....    | 95  |
| Figure S40. $^{13}\text{C}$ NMR (150 MHz, $\text{CDCl}_3$ ) of H51 ..... | 96  |
| Figure S41. $^1\text{H}$ NMR (600 MHz, $\text{CDCl}_3$ ) of O52 .....    | 97  |
| Figure S42. $^{13}\text{C}$ NMR (150 MHz, $\text{CDCl}_3$ ) of O52 ..... | 98  |
| Figure S43. $^1\text{H}$ NMR (600 MHz, $\text{CDCl}_3$ ) of O54 .....    | 99  |
| Figure S44. $^{13}\text{C}$ NMR (150 MHz, $\text{CDCl}_3$ ) of O54 ..... | 100 |
| Figure S45. $^1\text{H}$ NMR (600 MHz, $\text{CDCl}_3$ ) of O55 .....    | 101 |

|                                                                                            |     |
|--------------------------------------------------------------------------------------------|-----|
| Figure S46. $^{13}\text{C}$ NMR (150 MHz, $\text{CDCl}_3$ ) of O55 .....                   | 102 |
| Figure S47. $^1\text{H}$ NMR (600 MHz, $\text{CDCl}_3$ ) of O56 .....                      | 103 |
| Figure S48. $^{13}\text{C}$ NMR (150 MHz, $\text{CDCl}_3$ ) of O56 .....                   | 104 |
| Figure S49. $^1\text{H}$ NMR (600 MHz, $\text{CDCl}_3$ ) of H57 .....                      | 105 |
| Figure S50. $^{13}\text{C}$ NMR (150 MHz, $\text{CDCl}_3$ ) of H57 .....                   | 106 |
| Figure S51. $^1\text{H}$ NMR (600 MHz, $\text{CDCl}_3$ ) of O58 (Boc deprotected) .....    | 107 |
| Figure S52. $^{13}\text{C}$ NMR (150 MHz, $\text{CDCl}_3$ ) of O58 (Boc deprotected) ..... | 108 |
| Figure S53. $^1\text{H}$ NMR (600 MHz, $\text{CDCl}_3$ ) of O59 .....                      | 109 |
| Figure S54. $^{13}\text{C}$ NMR (150 MHz, $\text{CDCl}_3$ ) of O59 .....                   | 110 |
| Figure S55. $^1\text{H}$ NMR (600 MHz, $\text{CDCl}_3$ ) of O60 .....                      | 111 |
| Figure S56. $^{13}\text{C}$ NMR (150 MHz, $\text{CDCl}_3$ ) of O60 .....                   | 112 |
| Figure S57. $^1\text{H}$ NMR (600 MHz, $\text{CDCl}_3$ ) of O61 .....                      | 113 |
| Figure S58. $^{13}\text{C}$ NMR (150 MHz, $\text{CDCl}_3$ ) of O61 .....                   | 114 |
| Figure S59. $^1\text{H}$ NMR (600 MHz, $\text{CDCl}_3$ ) of O62 .....                      | 115 |
| Figure S60. $^{13}\text{C}$ NMR (150 MHz, $\text{CDCl}_3$ ) of O62 .....                   | 116 |
| Figure S61. $^1\text{H}$ NMR (600 MHz, $\text{CDCl}_3$ ) of H63 .....                      | 117 |
| Figure S62. $^{13}\text{C}$ NMR (150 MHz, $\text{CDCl}_3$ ) of H63 .....                   | 118 |
| Figure S63. $^1\text{H}$ NMR (600 MHz, $\text{CDCl}_3$ ) of O64 .....                      | 119 |
| Figure S64. $^{13}\text{C}$ NMR (150 MHz, $\text{CDCl}_3$ ) of O64 .....                   | 120 |
| Figure S65. $^1\text{H}$ NMR (600 MHz, $\text{CDCl}_3$ ) of O65 .....                      | 121 |
| Figure S66. $^{13}\text{C}$ NMR (150 MHz, $\text{CDCl}_3$ ) of O65 .....                   | 122 |
| Figure S67. $^1\text{H}$ NMR (600 MHz, $\text{CDCl}_3$ ) of O66 .....                      | 123 |
| Figure S68. $^{13}\text{C}$ NMR (150 MHz, $\text{CDCl}_3$ ) of O66 .....                   | 124 |
| Figure S69. $^1\text{H}$ NMR (600 MHz, $\text{CDCl}_3$ ) of O67 .....                      | 125 |
| Figure S70. $^{13}\text{C}$ NMR (150 MHz, $\text{CDCl}_3$ ) of O67 .....                   | 126 |
| Figure S71. $^1\text{H}$ NMR (600 MHz, $\text{CDCl}_3$ ) of O68 .....                      | 127 |
| Figure S72. $^{13}\text{C}$ NMR (150 MHz, $\text{CDCl}_3$ ) of O68 .....                   | 128 |
| Figure S73. $^1\text{H}$ NMR (600 MHz, $\text{CDCl}_3$ ) of O69 .....                      | 129 |
| Figure S74. $^{13}\text{C}$ NMR (150 MHz, $\text{CDCl}_3$ ) of O69 .....                   | 130 |
| Figure S75. $^1\text{H}$ NMR (600 MHz, $\text{CDCl}_3$ ) of O70 .....                      | 131 |
| Figure S76. $^{13}\text{C}$ NMR (150 MHz, $\text{CDCl}_3$ ) of O70 .....                   | 132 |
| Figure S77. $^1\text{H}$ NMR (600 MHz, $\text{CDCl}_3$ ) of O71 .....                      | 133 |
| Figure S78. $^{13}\text{C}$ NMR (150 MHz, $\text{CDCl}_3$ ) of O71 .....                   | 134 |
| Figure S79. $^1\text{H}$ NMR (600 MHz, $\text{CD}_3\text{COCD}_3$ ) of O72.....            | 135 |
| Figure S80. $^{13}\text{C}$ NMR (150 MHz, $\text{CDCl}_3$ ) of O72 .....                   | 136 |

|                                                                                  |     |
|----------------------------------------------------------------------------------|-----|
| Figure S81. $^1\text{H}$ NMR (600 MHz, $\text{CDCl}_3$ ) of O73 .....            | 137 |
| Figure S82. $^{13}\text{C}$ NMR (150 MHz, $\text{CDCl}_3$ ) of O73 .....         | 138 |
| Figure S83. $^1\text{H}$ NMR (600 MHz, $\text{CDCl}_3$ ) of O74 .....            | 139 |
| Figure S84. $^{13}\text{C}$ NMR (150 MHz, $\text{CDCl}_3$ ) of O74 .....         | 140 |
| Figure S85. $^1\text{H}$ NMR (600 MHz, $\text{CDCl}_3$ ) of 1.1 .....            | 141 |
| Figure S86. $^{13}\text{C}$ NMR (150 MHz, $\text{CDCl}_3$ ) of 1.1 .....         | 142 |
| Figure S87. $^1\text{H}$ NMR (600 MHz, $\text{CDCl}_3$ ) of 1.2 .....            | 143 |
| Figure S88. $^{13}\text{C}$ NMR (150 MHz, $\text{CDCl}_3$ ) of 1.2 .....         | 144 |
| Figure S89. $^1\text{H}$ NMR (600 MHz, $\text{CDCl}_3$ ) of 1.3 .....            | 145 |
| Figure S90. $^{13}\text{C}$ NMR (150 MHz, $\text{CDCl}_3$ ) of 1.3 .....         | 146 |
| Figure S91. $^1\text{H}$ NMR (600 MHz, $\text{CDCl}_3$ ) of 1.4 .....            | 147 |
| Figure S92. $^{13}\text{C}$ NMR (150 MHz, $\text{CDCl}_3$ ) of 1.4 .....         | 148 |
| Figure S93. $^1\text{H}$ NMR (600 MHz, $\text{CD}_3\text{COCD}_3$ ) of 2.1 ..... | 149 |
| Figure S94. $^{13}\text{C}$ NMR (150 MHz, $\text{CDCl}_3$ ) of 2.1 .....         | 150 |
| Figure S95. $^1\text{H}$ NMR (600 MHz, $\text{CDCl}_3$ ) of 2.2 .....            | 151 |
| Figure S96. $^{13}\text{C}$ NMR (150 MHz, $\text{CDCl}_3$ ) of 2.2 .....         | 152 |
| Figure S97. $^1\text{H}$ NMR (600 MHz, $\text{CDCl}_3$ ) of 2.3 .....            | 153 |
| Figure S98. $^{13}\text{C}$ NMR (150 MHz, $\text{CDCl}_3$ ) of 2.3 .....         | 154 |
| Figure S99. $^1\text{H}$ NMR (600 MHz, $\text{CDCl}_3$ ) of 2.4 .....            | 155 |
| Figure S100. $^{13}\text{C}$ NMR (150 MHz, $\text{CDCl}_3$ ) of 2.4 .....        | 156 |
| Figure S101. $^1\text{H}$ NMR (600 MHz, $\text{CDCl}_3$ ) of 2.5 .....           | 157 |
| Figure S102. $^{13}\text{C}$ NMR (150 MHz, $\text{CDCl}_3$ ) of 2.5 .....        | 158 |
| Figure S103. $^1\text{H}$ NMR (600 MHz, $\text{CDCl}_3$ ) of 3.1 .....           | 159 |
| Figure S104. $^{13}\text{C}$ NMR (150 MHz, $\text{CDCl}_3$ ) of 3.1 .....        | 160 |
| Figure S105. $^1\text{H}$ NMR (600 MHz, $\text{CDCl}_3$ ) of 3.2 .....           | 161 |
| Figure S106. $^{13}\text{C}$ NMR (150 MHz, $\text{CDCl}_3$ ) of 3.2 .....        | 162 |
| Figure S107. $^1\text{H}$ NMR (600 MHz, $\text{CDCl}_3$ ) of 3.3 .....           | 163 |
| Figure S108. $^{13}\text{C}$ NMR (150 MHz, $\text{CDCl}_3$ ) of 3.3 .....        | 164 |
| Figure S109. $^1\text{H}$ NMR (600 MHz, $\text{CDCl}_3$ ) of 3.4 .....           | 165 |
| Figure S110. $^{13}\text{C}$ NMR (150 MHz, $\text{CDCl}_3$ ) of 3.4 .....        | 166 |
| Figure S111. $^1\text{H}$ NMR (600 MHz, $\text{CDCl}_3$ ) of 3.5 .....           | 167 |
| Figure S112. $^{13}\text{C}$ NMR (150 MHz, $\text{CDCl}_3$ ) of 3.5 .....        | 168 |
| Figure S113. $^1\text{H}$ NMR (600 MHz, $\text{CDCl}_3$ ) of 4.2 .....           | 169 |
| Figure S114. $^{13}\text{C}$ NMR (150 MHz, $\text{CDCl}_3$ ) of 4.2 .....        | 170 |
| Figure S115. $^1\text{H}$ NMR (600 MHz, $\text{CDCl}_3$ ) of 4.3 .....           | 171 |

|                                                                           |     |
|---------------------------------------------------------------------------|-----|
| Figure S116. $^{13}\text{C}$ NMR (150 MHz, $\text{CDCl}_3$ ) of 4.3 ..... | 172 |
| Figure S117. $^1\text{H}$ NMR (600 MHz, $\text{CDCl}_3$ ) of 4.4 .....    | 173 |
| Figure S118. $^{13}\text{C}$ NMR (150 MHz, $\text{CDCl}_3$ ) of 4.4 ..... | 174 |
| Figure S119. $^1\text{H}$ NMR (600 MHz, $\text{CDCl}_3$ ) of 4.5 .....    | 175 |
| Figure S120. $^{13}\text{C}$ NMR (150 MHz, $\text{CDCl}_3$ ) of 4.5 ..... | 176 |
| Figure S121. $^1\text{H}$ NMR (600 MHz, $\text{CDCl}_3$ ) of 4.6 .....    | 177 |
| Figure S122. $^{13}\text{C}$ NMR (150 MHz, $\text{CDCl}_3$ ) of 4.6 ..... | 178 |
| Figure S123. $^1\text{H}$ NMR (600 MHz, $\text{CDCl}_3$ ) of 5.2 .....    | 179 |
| Figure S124. $^{13}\text{C}$ NMR (150 MHz, $\text{CDCl}_3$ ) of 5.2 ..... | 180 |
| Figure S125. $^1\text{H}$ NMR (600 MHz, $\text{CDCl}_3$ ) of 5.3 .....    | 181 |
| Figure S126. $^{13}\text{C}$ NMR (150 MHz, $\text{CDCl}_3$ ) of 5.3 ..... | 182 |
| Figure S127. $^1\text{H}$ NMR (600 MHz, $\text{CDCl}_3$ ) of 5.4 .....    | 183 |
| Figure S128. $^{13}\text{C}$ NMR (150 MHz, $\text{CDCl}_3$ ) of 5.4 ..... | 184 |
| Figure S129. $^1\text{H}$ NMR (600 MHz, $\text{CDCl}_3$ ) of 5.5 .....    | 185 |
| Figure S130. $^{13}\text{C}$ NMR (150 MHz, $\text{CDCl}_3$ ) of 5.5 ..... | 186 |



## Experimental Section

**General Information:** Glassware was flame-dried under vacuum for all non-aqueous reactions. All reagents and solvents were commercial grade and purified prior to use when necessary. Toluene, THF and dichloromethane (CH<sub>2</sub>Cl<sub>2</sub>) were dried by passage through a column of activated alumina as described by Grubbs.<sup>1</sup> Flash column chromatography was performed using Sorbent Technologies 230-400 mesh silica gel with solvent systems indicated. Analytical thin layer column chromatography was performed using Sorbent Technologies 250 μm glass backed UV254 silica gel plates and were visualized by fluorescence upon 250 nm radiation and/or the by use of TLC stain. Solvent removal was effected by rotary evaporation under vacuum (~ 25-40 mm Hg). All extracts were dried with Na<sub>2</sub>SO<sub>4</sub> unless otherwise noted. Preparative HPLC was performed on an Agilent 1260 system (column: Zorbax Eclipse XDB-C18; 21.2 mm x 150 mm, 5 μm, flow rate 8 mL/min) with 210 nm monitoring wavelength and acetonitrile/water (+0.1% TFA) gradient as indicated. Nuclear magnetic resonance spectra (NMR) were acquired on a Bruker AV-400 (400 MHz) or Bruker AV II-600 (600 MHz) instrument. Mass spectra were recorded by use of electron impact ionization (EI), or electro-spray ionization (ESI) on a high resolution TQ-Orbitrap 3 XL Penn or Orbitrap 2 Classic FPG in the Vanderbilt Mass Spectrometry Core Laboratory. IR spectra were recorded on a Nicolet Avatar 360 spectrophotometer and are reported in wavenumbers (cm<sup>-1</sup>) as neat films on a NaCl plate (transmission). Melting points were measured using an OptiMelt automated melting point system (Stanford Research Systems) and are not corrected. Chiral HPLC analysis was conducted on an Agilent 1200 series Infinity instrument using a ChiralPak column. Optical rotations were measured on a Jasco P-2000 polarimeter.

**Purity Statement:** Although each macrocycle was purified by preparative HPLC, and detected by UV (210 nm), the compounds reported often lack a good chromophore. However, the use of HPLC in combination with NMR analysis led us to judge compounds to be a minimum of 90% pure, likely >95%. Images of NMR spectra of all new compounds are provided.

**Biological Experiments:** All animal studies were approved (protocol number M1900081) and carried out in accordance with the guidelines and procedures set forth by the Vanderbilt Division of Animal Care. Cardiomyocytes were isolated from C57Bl/6J mice, as previously reported.<sup>2</sup> Calcium spark experiments were conducted, as previously reported.<sup>3</sup> Briefly, ventricular cardiomyocytes were adhered to laminin-coated glass bottom culture dishes, permeabilized with saponin, and incubated with an internal solution containing the calcium sensitive dye, Fluo-4. Elementary spark recordings were made using an Olympus inverted microscope equipped with a solid-state diode laser at 488 nm for excitation, 40× silicone objective (1.25 NA), and Hamamatsu CMOS camera for detection. The internal solution contained vehicle or compound and all data were collected 15 – 30 minutes after drug application. Spark detection analysis was performed using SparkMaster2.<sup>4</sup> Statistical analysis was carried out in R using a hierarchical clustering model to account for mouse-to-

---

<sup>1</sup> Pangborn, A. B.; Giardello, M. A.; Grubbs, R. H.; Rosen, R. K.; Timmers, F. J. Safe and convenient procedure for solvent purification. *Organometallics* **1996**, *15*, (5), 1518.

<sup>2</sup> Batiste, S. M.; Blackwell, D. J.; Kim, K.; Kryshal, D. O.; Gomez-Hurtado, N.; Rebbeck, R. T.; Cornea, R. L.; Johnston, J. N.; Knollmann, B. C. Unnatural verticilide enantiomer inhibits type 2 ryanodine receptor-mediated calcium leak and is antiarrhythmic. *Proc. Natl. Acad. Sci. U. S. A.* **2019**, *116*, 4810.

<sup>3</sup> Smith, A. N.; Blackwell, D. J.; Knollmann, B. C.; Johnston, J. N. Ring Size as an Independent Variable in Cyclooligomeric Depsipeptide Antiarrhythmic Activity. *ACS Med. Chem. Lett.* **2021**, *12*, (12), 1942.

<sup>4</sup> Tomek, J.; Nieves-Cintrón, M.; Navedo, M. F.; Ko, C. Y.; Bers, D. M. SparkMaster 2: A New Software for Automatic Analysis of Calcium Spark Data. *Circ Res* **2023**, *133*, (6), 450. .

mouse variability provided by Sikkel et al.<sup>5</sup> Bonferroni-adjusted P values are reported in the figure legends. A cutoff value of 0.05 was used as the threshold to reject the null hypothesis.

**Safety:** No unexpected or unusually high safety hazards were encountered.

**Biological Experiment Data:** Calcium spark parameters

For all series, assay is run with 25  $\mu$ M solution of drug. Values are normalized to the vehicle (DMSO) condition and reported as mean  $\pm$  standard deviation. Statistical comparisons were made using a hierarchical clustering model with Bonferroni correction. Adjusted p-values < 0.05 vs vehicle are indicated with an asterisk. Each mouse was an independent experiment, the replicates are listed as n (cells).

| Series 1  | Vehicle (DMSO)  | ent-verticilide (1) | 1.1             | 1.2             | 1.3             | 1.4             | 1.5             |
|-----------|-----------------|---------------------|-----------------|-----------------|-----------------|-----------------|-----------------|
| N (mice)  | 12              | 2                   | 5               | 5               | 5               | 4               | 4               |
| n (cells) | 292             | 29                  | 102             | 105             | 108             | 119             | 87              |
| Frequency | 1.00 $\pm$ 0.28 | 0.51 $\pm$ 0.36*    | 1.03 $\pm$ 0.27 | 0.92 $\pm$ 0.28 | 0.96 $\pm$ 0.29 | 0.90 $\pm$ 0.36 | 1.00 $\pm$ 0.31 |
| Amplitude | 1.00 $\pm$ 0.26 | 0.82 $\pm$ 0.43*    | 1.01 $\pm$ 0.25 | 0.99 $\pm$ 0.24 | 1.04 $\pm$ 0.28 | 0.93 $\pm$ 0.24 | 1.00 $\pm$ 0.25 |
| Mass      | 1.00 $\pm$ 1.15 | 0.057 $\pm$ 0.47*   | 0.98 $\pm$ 0.59 | 0.95 $\pm$ 0.51 | 0.91 $\pm$ 0.48 | 0.84 $\pm$ 0.32 | 1.00 $\pm$ 0.32 |
| Leak      | 1.00 $\pm$ 1.20 | 0.36 $\pm$ 0.38*    | 1.02 $\pm$ 0.71 | 0.91 $\pm$ 0.63 | 0.90 $\pm$ 0.60 | 0.77 $\pm$ 0.53 | 0.91 $\pm$ 0.46 |

Supplement Table 1. Calcium spark parameters from murine cardiomyocytes for ent-verticilide and series 1 analogs.

| Series 2  | 2.1             | 2.2             | 2.3             | 2.4             | 2.5             |
|-----------|-----------------|-----------------|-----------------|-----------------|-----------------|
| N (mice)  | 2               | 2               | 2               | 2               | 2               |
| n (cells) | 38              | 46              | 54              | 50              | 50              |
| Frequency | 0.51 $\pm$ 0.25 | 0.83 $\pm$ 0.20 | 1.01 $\pm$ 0.20 | 0.97 $\pm$ 0.17 | 1.04 $\pm$ 0.20 |
| Amplitude | 0.93 $\pm$ 0.31 | 1.05 $\pm$ 0.24 | 0.92 $\pm$ 0.19 | 1.08 $\pm$ 0.22 | 1.17 $\pm$ 0.34 |
| Mass      | 1.04 $\pm$ 0.64 | 0.95 $\pm$ 0.39 | 1.02 $\pm$ 0.43 | 0.98 $\pm$ 0.39 | 1.06 $\pm$ 0.35 |
| Leak      | 0.60 $\pm$ 0.65 | 0.79 $\pm$ 0.44 | 1.03 $\pm$ 0.53 | 0.97 $\pm$ 0.56 | 1.09 $\pm$ 0.46 |

Supplement Table 2. Calcium spark parameters from murine cardiomyocytes for series 2 analogs.

| Series 3  | 3.1             | 3.2             | 3.3             | 3.4             | 3.5             |
|-----------|-----------------|-----------------|-----------------|-----------------|-----------------|
| N (mice)  | 4               | 3               | 4               | 5               | 5               |
| n (cells) | 79              | 58              | 79              | 80              | 91              |
| Frequency | 0.79 $\pm$ 0.29 | 0.97 $\pm$ 0.28 | 0.96 $\pm$ 0.26 | 1.15 $\pm$ 0.26 | 0.94 $\pm$ 0.25 |
| Amplitude | 0.99 $\pm$ 0.20 | 1.02 $\pm$ 0.20 | 1.00 $\pm$ 0.16 | 0.99 $\pm$ 0.18 | 0.97 $\pm$ 0.19 |
| Mass      | 0.81 $\pm$ 0.55 | 1.03 $\pm$ 0.50 | 0.96 $\pm$ 0.42 | 0.98 $\pm$ 0.45 | 1.07 $\pm$ 0.64 |
| Leak      | 0.75 $\pm$ 0.63 | 0.99 $\pm$ 0.53 | 0.93 $\pm$ 0.45 | 1.20 $\pm$ 0.63 | 1.04 $\pm$ 0.71 |

Supplement Table 3. Calcium spark parameters from murine cardiomyocytes for series 3 analogs.

<sup>5</sup> Sikkel, M. B.; Francis, D. P.; Howard, J.; Gordon, F.; Rowlands, C.; Peters, N. S.; Lyon, A. R.; Harding, S. E.; MacLeod, K. T. Hierarchical statistical techniques are necessary to draw reliable conclusions from analysis of isolated cardiomyocyte studies. *Cardiovasc. Res.* **2017**, *113*, (14), 1743.

| Series 4  | 4.1         | 4.2         | 4.3         | 4.4         | 4.5         | 4.6         |
|-----------|-------------|-------------|-------------|-------------|-------------|-------------|
| N (mice)  | 4           | 2           | 2           | 2           | 2           | 2           |
| n (cells) | 66          | 42          | 37          | 38          | 43          | 37          |
| Frequency | 0.96 ± 0.28 | 0.87 ± 0.29 | 1.08 ± 0.27 | 1.02 ± 0.24 | 1.16 ± 0.30 | 1.08 ± 0.36 |
| Amplitude | 1.01 ± 0.31 | 1.24 ± 0.35 | 1.32 ± 0.31 | 1.16 ± 0.31 | 1.17 ± 0.22 | 1.15 ± 0.22 |
| Mass      | 1.19 ± 1.03 | 1.57 ± 0.89 | 1.66 ± 0.94 | 1.42 ± 1.09 | 1.29 ± 0.40 | 1.10 ± 0.52 |
| Leak      | 1.19 ± 1.10 | 1.35 ± 1.14 | 1.79 ± 1.49 | 1.38 ± 1.21 | 1.43 ± 0.66 | 1.15 ± 0.71 |

Supplement Table 4. Calcium spark parameters from murine cardiomyocytes for series 4 analogs.

| Series 5  | 5.1         | 5.2         | 5.3         | 5.4         | 5.5         | 5.6         |
|-----------|-------------|-------------|-------------|-------------|-------------|-------------|
| N (mice)  | 4           | 5           | 5           | 5           | 5           | 4           |
| n (cells) | 66          | 85          | 93          | 100         | 89          | 67          |
| Frequency | 0.96 ± 0.28 | 0.79 ± 0.35 | 0.94 ± 0.31 | 0.89 ± 0.29 | 1.02 ± 0.33 | 1.11 ± 0.29 |
| Amplitude | 1.01 ± 0.31 | 1.13 ± 0.23 | 1.08 ± 0.18 | 1.02 ± 0.21 | 1.06 ± 0.18 | 1.07 ± 0.19 |
| Mass      | 1.19 ± 1.03 | 1.11 ± 0.47 | 1.17 ± 0.47 | 1.13 ± 0.69 | 0.96 ± 0.42 | 1.30 ± 0.75 |
| Leak      | 1.19 ± 1.10 | 1.08 ± 0.66 | 1.23 ± 0.57 | 1.14 ± 0.69 | 1.14 ± 0.65 | 1.54 ± 1.17 |

Supplement Table 5. Calcium spark parameters from murine cardiomyocytes for series 5 analogs.

### General Procedures

**tert-Butyloxycarbonyl (Boc) Deprotection:** A round-bottom flask was charged with the depsipeptide (1 equiv) and dissolved in either 4 M HCl/ethyl acetate (1 M in depsipeptide) or 20% TFA in DCM. The reaction was allowed to stir for 1-3 h at ambient temperature. The crude reaction mixture was concentrated, ether was added, and the mixture was then reconcentrated. This procedure was repeated 3 times with diethyl ether.

**Benzyl Deprotection:** A round-bottom flask was charged with the depsipeptide (1 equiv) dissolved in methanol or ethyl acetate (0.1 M) and treated with 10% Pd/C (20 mol%). The reaction flask was evacuated with a light vacuum (~40 Torr). Hydrogen (balloon) was added and then the flask was cycled through a light vacuum three times. The reaction was stirred for 1.5-3 h. After purging with argon, the crude reaction mixture was filtered through Celite and concentrated to afford the carboxylic acid.

**PyBrop Coupling Reaction:** A round-bottom flask was charged with the two depsipeptide coupling partners (1:1), along with dry DCM or DMF (0.1 M). The solution was cooled to 0 °C and placed under argon. PyBrop (1.5 equiv) and freshly distilled DIPEA (3 equiv) were added. The reaction was allowed to stir for 30 minutes at 0 °C and 1.5-18 h at ambient temperature. Reaction progression was monitored by TLC and/or TLC-MS. The reaction mixture was poured into cold 10% aq citric acid and extracted with EtOAc. The combined organic layers were washed with satd aq NaHCO<sub>3</sub>, brine, dried, and concentrated. The crude residue was subjected to flash column chromatography.

**PyBOP Macrocyclization:** The reaction mixture was added to a flame-dried round bottom flask. Dry DMF or DCM (0.005 M) was added and the reaction was cooled to 0 °C. Once at 0 °C, freshly distilled DIPEA (3 equiv) and PyBop (1.05 equiv) were added. The reaction was stirred at 0 °C for 30 minutes, then allowed to warm to ambient temperature and stir for an additional 1.5-3 h. Reaction progression was monitored by TLC and/or TLC-MS. The reaction mixture was poured into cold 10% aq citric acid and extracted with EtOAc. The combined organic layers were washed with satd aq NaHCO<sub>3</sub>, brine, and then dried and concentrated. The crude reaction mixture was purified via preparative HPLC.

**HATU Coupling Reaction:** A round-bottom flask was charged with the amine and acid (1:1), and dry DMF or DCM (0.1 M). The mixture was cooled to 0 °C and then freshly distilled DIPEA (3 equiv) and HATU (3 equiv) were added. The reaction was stirred at 0 °C for 30 min, then warmed to 23 °C for 3-18 h. Reaction progression was monitored by TLC and/or TLC-MS. The reaction mixture was poured into cold 10% aq citric acid and extracted with EtOAc. The combined organic layers were washed with satd aq NaHCO<sub>3</sub>, brine, dried, and concentrated. The crude residue was subjected to flash column chromatography.

### General Reaction Schemes

#### A. di(depsi)peptide synthesis

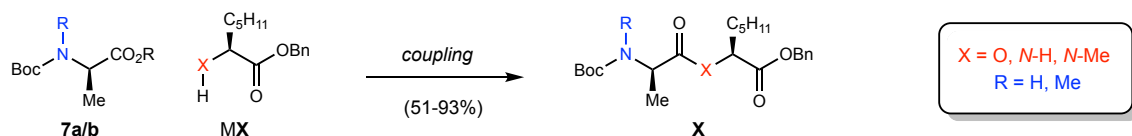

#### B. tetra(depsi)peptide synthesis

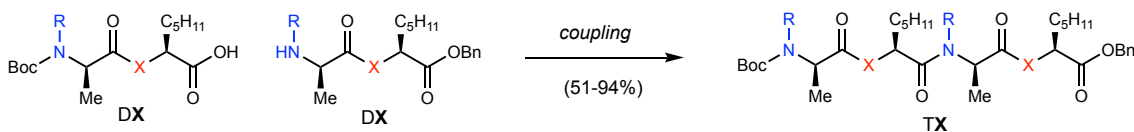

#### C. hexa(depsi)peptide synthesis

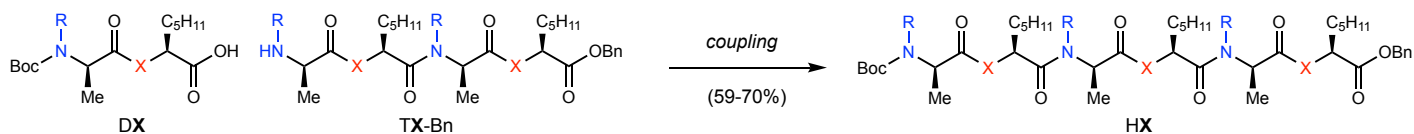

#### D. octa(depsi)peptide synthesis

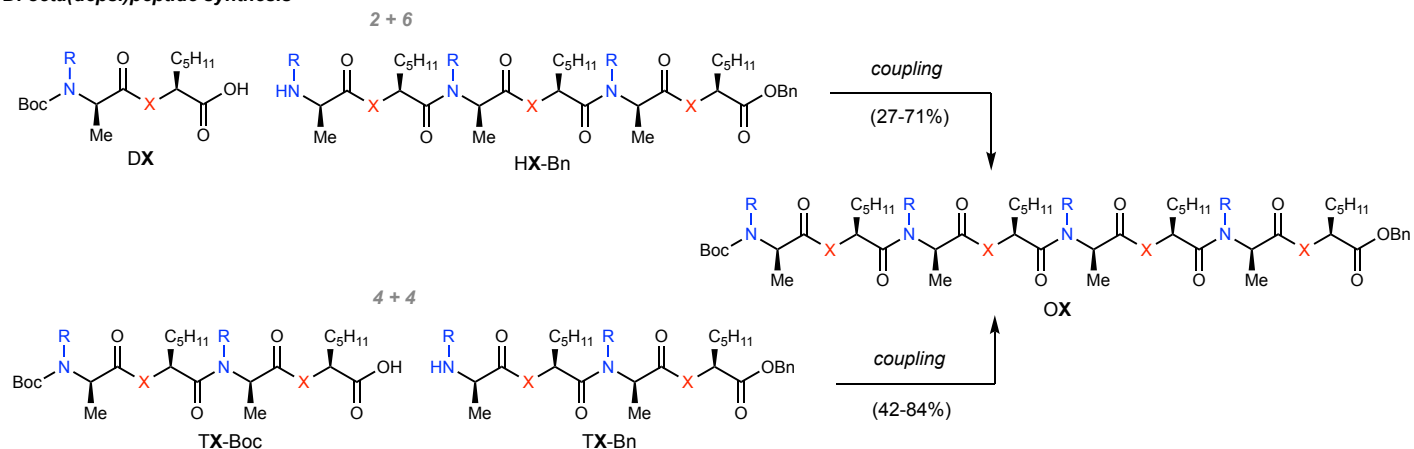

Scheme 1. A-D. Generalized reaction schemes for the synthesis of various intermediates. Individual reaction conditions can be found in the Experimental Procedures section.

## Experimental Procedures and Characterization Data for Reported Compounds

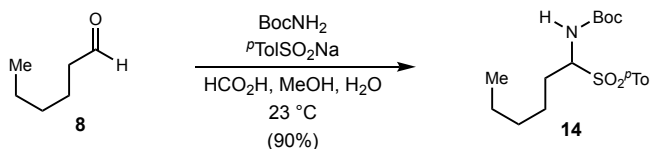

**1-Tosylhexan-1-amine (14).** A round-bottom flask was charged with hexanal (9.0 mL, 73 mmol), *tert*-butyl carbamate (5.7 g, 49 mmol), and MeOH (73 mL) and stirred until it became a homogenous solution. NaSO<sub>2</sub><sup>*p*</sup>Tol (17.4 g, 97.6 mmol) was added, along with enough H<sub>2</sub>O to dissolve the solids (100 mL). Then formic acid (3.68 mL, 97.6 mmol) was added, and the mixture was allowed to stir at ambient temperature under argon for 4 d. The reaction mixture was filtered and washed with H<sub>2</sub>O and hexanes to afford the product as a white solid (15.5 g, 90%). Mp 107- 110 °C; R<sub>f</sub> = 0.26 (10% EtOAc/hexanes); IR (film) 3334, 2958, 2930, 2861, 1721, 1597, 1518, 1456, 1392, 1316, 1245, 1167, 1142, 1085 cm<sup>-1</sup>; <sup>1</sup>H NMR (600 MHz, CDCl<sub>3</sub>) The small doubling of peaks is due to *cis* and *trans* amide rotamers. The largely favored isomer is listed here: δ 7.76 (d, *J* = 8.8 Hz, 2H), 7.30 (d, *J* = 7.9 Hz, 2H), 5.10 (d, *J* = 11.0 Hz, 1H), 4.79 (td, *J* = 10.9, 3.4 Hz, 1H), 2.38 (s, 3H), 2.24-2.16 (m, 1H), 1.74-1.65 (m, 1H), 1.55-1.23 (m, 6H), 1.19 (s, 9H) 0.86 (t, *J* = 6.5 Hz, 3H); <sup>13</sup>C NMR (150 MHz, CDCl<sub>3</sub>) ppm 154.0, 144.9, 134.0, 129.7, 129.4, 80.6, 31.2, 28.0, 27.7, 26.4, 25.0, 22.4, 21.7, 14.0; HRMS (EI): Exact mass calcd for C<sub>18</sub>H<sub>29</sub>NNaO<sub>4</sub>S [M+Na]<sup>+</sup> 378.1710, found 378.1719.

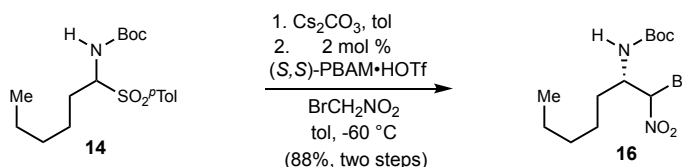

***tert*-Butyl ((2*S*)-1-bromo-1-nitroheptan-2-yl)carbamate (16).** A round-bottom flask was charged with sulfone (6.00 g, 16.8 mmol), Cs<sub>2</sub>CO<sub>3</sub> (27.5 g, 84.4 mmol), and toluene (160 mL). The mixture was allowed to stir at ambient temperature under argon for 6 h. The reaction mixture was filtered through a pad of Celite and concentrated. The crude oil was then dissolved in toluene (248 mL) and to it was added (*S,S*)-PBAM as its triflic acid salt (217.5 mg, 331 μmol). The reaction was cooled to -60 °C and bromonitromethane (1.74 mL, 24.8 mmol) was added. The reaction was allowed to stir for 48 h. The reaction mixture was quenched by running it through a short silica plug while still cold, with 100% EtOAc. The fractions were combined and concentrated. The crude residue was subjected to flash column chromatography (SiO<sub>2</sub>, 5% ethyl acetate in hexanes) to afford the α-bromo nitroalkane (1:1 dr (<sup>1</sup>H NMR)) as a white solid (4.5 g, 88% 2-step); The diastereomers were determined to be 90% and 89% ee by chiral HPLC analysis (Chiralcel AD-H, 1% <sup>*i*</sup>PrOH /hexanes, 1.0 mL/min, *tr*(*d1*, major) = 19.6 min, *tr*(*d1*, minor) = 21.1 min, *tr*(*d2*, minor) = 25.1 min, *tr*(*d2*, major) = 29.4 min). [ $\alpha$ ]<sub>D</sub><sup>23</sup> -20 (c 0.53, CHCl<sub>3</sub>); Mp 62-66 °C; R<sub>f</sub> = 0.60 (10% EtOAc/hexanes); IR (film) 3332, 2958, 2931, 2861, 1706, 1567, 1501, 1458, 1392, 1367, 1248, 1165, 1045 cm<sup>-1</sup>; <sup>1</sup>H NMR (600 MHz, CDCl<sub>3</sub>, 1:1 mixture of diastereomers) δ 6.19 (d, *J* = 4.4 Hz, 1H), 6.17 (d, *J* = 3.0 Hz, 1H), 4.83 (d, *J* = 8.8 Hz, 1H), 4.73 (d, *J* = 9.1 Hz, 1H), 4.34 (dddd, *J* = 9.2, 9.2, 3.9, 3.9 Hz, 1H), 4.24 (dddd, *J* = 9.2, 9.2, 4.6, 4.6 Hz, 1H), 1.90-1.52 (series of m, 4H), 1.46 (s, 9H), 1.44 (s, 9H), 1.40-1.22 (m, 12H), 0.90 (t, *J* = 7.0 Hz, 3H), 0.88 (t, *J* = 6.9 Hz, 3H); <sup>13</sup>C NMR (150 MHz, CDCl<sub>3</sub>, 1:1 mixture of diastereomers) ppm 155.2, 155.1, 84.5, 83.2, 80.9, 80.8, 55.0, 54.5, 31.32, 31.28, 30.5, 28.5, 28.4, 28.3, 25.6, 25.5, 22.52, 22.51, 14.0(2C); HRMS (EI): Exact mass calcd for C<sub>12</sub>H<sub>23</sub>BrN<sub>2</sub>NaO<sub>4</sub> [M+Na]<sup>+</sup> 361.0733, found 361.0737.

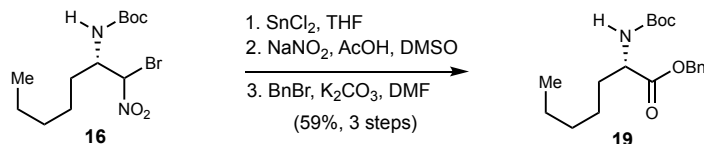

**Benzyl (S)-2-((tert-butoxycarbonyl)amino)heptanoate (19).** A flame-dried round-bottom flask was charged with halo-nitro alkane (383 mg, 1.13 mmol), tin chloride (428 mg, 2.26 mmol), and THF (11.3 mL). The mixture was allowed to stir at ambient temperature under argon for 12 h. The reaction mixture was then poured into H<sub>2</sub>O, and diethyl ether was added into the separatory funnel. The organic layer was filtered through a pad of Celite, washed with H<sub>2</sub>O (three times), dried, and concentrated to afford a pale-yellow oil. The crude oil was then dissolved in DMSO (8.7 mL) and to it was added NaNO<sub>2</sub> (234 mg, 3.39 mmol) and AcOH (885  $\mu$ L, 17.0 mmol). The reaction was heated to 60 °C and allowed to stir for 12 h. The reaction mixture was allowed to cool to ambient temperature, quenched with 1 M aq HCl, poured into a separatory funnel, and extracted with EtOAc. The organic layers were washed with ice water (four times), dried, and concentrated. The crude reaction mixture was dissolved in DMF (2.1 mL), and to it was added K<sub>2</sub>CO<sub>3</sub> (427 mg, 3.09 mmol) and BnBr (148  $\mu$ L, 1.24 mmol). The reaction was allowed to stir at ambient temperature under argon for 12 h. The reaction was quenched with 1 M aq HCl and then extracted with EtOAc. The organic layers were then dried and concentrated. The crude residue was subjected to flash column chromatography (SiO<sub>2</sub>, 10% ethyl acetate in hexanes) to afford the product as a colorless oil (366 mg, 59% (3 steps));  $[\alpha]_D^{23}$  -5.39 (c 1.08, CHCl<sub>3</sub>); R<sub>f</sub> = 0.33 (10% EtOAc/hexanes); IR (film) 3365, 2957, 2931, 2861, 1717, 1499, 1456, 1366, 1249, 1161, 1048 cm<sup>-1</sup>; <sup>1</sup>H NMR (400 MHz, CDCl<sub>3</sub>)  $\delta$  7.40-7.28 (m, 5H), 5.21 (d, *J* = 12.4 Hz, 1H), 5.12 (d, *J* = 12.4 Hz, 1H), 5.02 (d, *J* = 7.8 Hz, 1H), 4.35 (ddd, *J* = 11.7, 6.2, 6.2 Hz, 1H), 1.85-1.70 (m, 1H), 1.68-1.55 (m, 1H), 1.43 (s, 9H), 1.36-1.17 (m, 6H), 0.85 (t, *J* = 6.3 Hz, 3H); <sup>13</sup>C NMR (100 MHz, CDCl<sub>3</sub>) ppm 172.9, 156.5, 136.6, 128.7, 128.4, 128.3, 79.8, 66.9, 53.7, 32.7, 31.4, 28.4, 24.9, 22.5, 14.0; HRMS (EI): Exact mass calcd for C<sub>19</sub>H<sub>29</sub>NNaO<sub>4</sub> [M+Na]<sup>+</sup> 358.1989, found 358.1993.

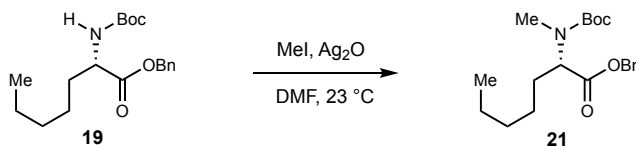

**Benzyl (S)-2-((tert-butoxycarbonyl)(methyl)amino)heptanoate (21).** A flame-dried round-bottom flask was charged with the  $\alpha$ -amino ester (266 mg, 793  $\mu$ mol), MeI (789  $\mu$ g, 12.69 mmol), Ag<sub>2</sub>O (735 mg, 3.17 mmol) and DMF (7.9 mL). The reaction vessel was wrapped in aluminum foil, and the mixture was allowed to stir at ambient temperature under argon for 12 h. The reaction mixture was filtered through a pad of Celite and concentrated, and then dissolved in EtOAc, washed with H<sub>2</sub>O, dried, and concentrated to afford a pale-yellow oil. The crude residue was subjected to flash column chromatography (SiO<sub>2</sub>, 5% ethyl acetate in hexanes) to afford the product as a colorless oil (244 mg, 87%);  $[\alpha]_D^{23}$  -20.6 (c 1.09, CHCl<sub>3</sub>); R<sub>f</sub> = 0.57 (10% EtOAc/hexanes); IR (film) 3033, 2931, 2860, 1743, 1697, 1455, 1391, 1366, 1327, 1149 cm<sup>-1</sup>; <sup>1</sup>H NMR (600 MHz, CDCl<sub>3</sub>) Several peaks show a clear doubling for the *cis* and *trans* amide products. Other peaks are overlapping and appear only once. Those that are doubled have both values listed.  $\delta$  7.40-7.28 (m, 5H), 5.15 (broad s, 2H), 4.80/4.47 (dd, *J* = 10.5, 4.8 Hz, 1H), 2.82/2.75 (s, 3H), 1.97-1.86 (m, 1H), 1.79-1.63 (m, 1H), 1.45/1.40 (s, 9H), 1.36-1.23 (m, 6H), 0.88/0.87 (t, *J* = 6.5 Hz, 3H); <sup>13</sup>C NMR (150 MHz, CDCl<sub>3</sub>) ppm The line listing for both *cis* and *trans* amide isomers is given, as a clear doubling of many peaks is evident. Whenever the isomer peaks overlap, it is stated that the particular peak is representing 2 or more carbons. 172.2, 172.0, 156.5, 155.8, 136.0, 135.8, 128.7, 128.6, 128.4, 128.2, 128.1, 128.0, 80.3, 80.0, 66.7, 66.6, 59.3, 57.9, 31.4(2C), 30.9, 30.5, 29.1, 28.7, 28.5, 28.4, 25.8(2C), 22.6(2C), 14.1, 14.0; HRMS (EI): Exact mass calcd for C<sub>20</sub>H<sub>31</sub>NNaO<sub>4</sub> [M+Na]<sup>+</sup> 372.2145, found 372.2149.

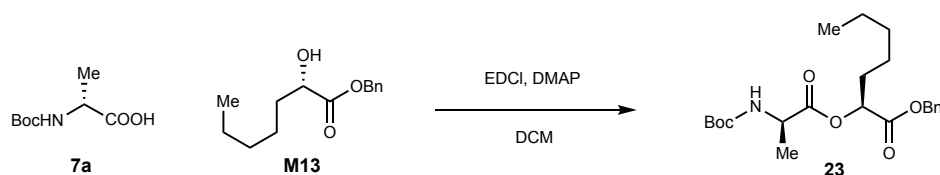

**Benzyl (S)-2-(((tert-butoxycarbonyl)-D-alanyl)oxy)heptanoate (23).** A round-bottom flask was charged with the amine (1.98 g, 9.73 mmol), alcohol (2.00 g, 8.46 mmol), and DCM (84.6 mL). The mixture was cooled to 0 °C and then EDCI (1.95 g, 10.2 mmol) and DMAP (51.7 mg, 424 μmol) were added. The reaction mixture was stirred at 0 °C for 30 min, and then allowed to warm to ambient temperature and stir for an additional 1.5 h before it was poured into water and extracted with DCM. The combined organic layers were washed with satd aq NaHCO<sub>3</sub>, brine, dried, and concentrated. The crude residue was subjected to flash column chromatography (SiO<sub>2</sub>, 2.5-20% ethyl acetate in hexanes) to afford the product as a white amorphous solid (2.54 g, 88%).  $[\alpha]_D^{24} -11.2$  (c 0.43, CHCl<sub>3</sub>);  $R_f = 0.29$  (10% EtOAc/hexanes); IR (film) 2954, 2926, 2856, 1745, 1666, 1455, 1408, 1306, 1212, 1107, 1076 cm<sup>-1</sup>; <sup>1</sup>H NMR (600 MHz, CDCl<sub>3</sub>) δ 7.39-7.31 (series of m, 5H), 5.20 (d,  $J = 12.1$  Hz, 1H), 5.14 (d,  $J = 12.1$  Hz, 1H), 5.07 (t,  $J = 3.7$  Hz, 1H), 5.02 (br m, 1H), 4.46-4.36 (br m, 1H), 1.89-1.82 (br m, 2H), 1.44 (s, 9H), 1.40 (br d,  $J = 7.3$  Hz, 3H), 1.37-1.33 (br m, 2H), 1.28-1.24 (br m, 4H), 0.88 (br t,  $J = 6.8$  Hz, 3H); <sup>13</sup>C NMR (150 MHz, CDCl<sub>3</sub>) ppm 172.7, 169.7, 155.9, 135.2, 128.6, 128.4, 128.3, 72.9, 70.5, 67.3, 67.0, 49.5, 31.2, 30.9, 28.3, 24.7, 18.6, 14.0; HRMS (EI): Exact mass calcd for C<sub>22</sub>H<sub>33</sub>NO<sub>6</sub>Na [M+Na]<sup>+</sup> 430.2206, found 430.2203. MPT-2-139.

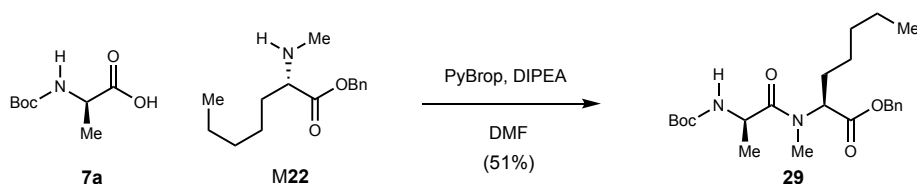

**Benzyl (S)-2-((R)-2-(((tert-butoxycarbonyl)amino)-N-methylpropanamido)heptanoate (29).** A round-bottom flask was charged with the amine (1.20 g, 4.80 mmol), acid (908 mg, 4.80 mmol), and DMF (4.2 mL). The mixture was cooled to 0 °C and then DIPEA (2.52 mL, 14.4 mmol) and PyBrop (3.52 g, 7.20 mmol) were added. The reaction was stirred at 0 °C for 30 min, then warmed to room temperature and stirred overnight. The reaction mixture was poured into cold 10% aq citric acid and extracted with EtOAc. The combined organic layers were washed with satd aq NaHCO<sub>3</sub>, brine, dried, and concentrated. The crude residue was subjected to flash column chromatography (SiO<sub>2</sub>, 5-30% ethyl acetate in hexanes) to afford the product as a white amorphous solid (1.07 g, 51%).  $[\alpha]_D^{24} + 7.2$  (c 0.44, CHCl<sub>3</sub>);  $R_f = 0.60$  (25% EtOAc/hexanes); IR (film) 2930, 1744, 1698, 1456, 1390, 1156 cm<sup>-1</sup>; <sup>1</sup>H NMR (600 MHz, CDCl<sub>3</sub>) δ 7.38-7.32 (series of m, 5H), 6.85 (br d,  $J = 7.2$  Hz, 1H), 5.25-5.21 (series of m, 2H), 5.03 (m, 1H), 4.70-4.21 (m, 1H), 3.16-2.62 (series of m, 3H), 1.84 (br m, 1H), 1.58 (br m, 2H), 1.45 (series of m, 9H), 1.36 (m, 2H), 1.28-1.23 (series of m, 6H), 0.86 (m,  $J = 6.9$  Hz, 3H); <sup>13</sup>C NMR (150 MHz, CDCl<sub>3</sub>) ppm 175.3, 171.0, 156.1, 135.3, 128.9, 128.4, 128.6, 128.5, 79.9, 72.8, 67.8, 52.8, 34.4, 31.9, 29.7, 28.4, 24.9, 22.3, 13.9; HRMS (EI): Exact mass calcd for C<sub>23</sub>H<sub>37</sub>N<sub>2</sub>O<sub>5</sub> [M+H]<sup>+</sup> 421.2702, found 421.2700. MPT-4-163.

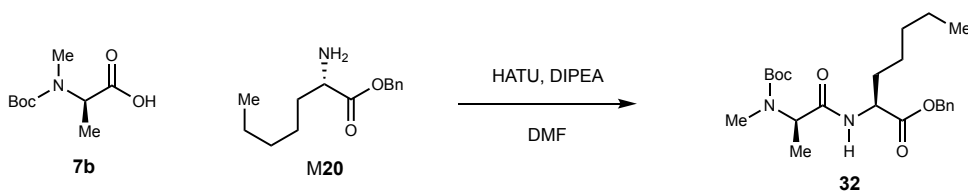

**Benzyl (S)-2-((R)-2-((tert-butoxycarbonyl)(methylamino)propanamido)heptanoate (32).** A round-bottom flask was charged with the amine (990 mg, 4.21 mmol), acid (855 mg, 4.21 mmol), and DMF (4.2 mL). The mixture was cooled to 0 °C and then DIPEA (2.20 mL, 12.6 mmol) and HATU (2.40 g, 6.32 mmol) were added. The reaction was stirred at 0 °C for 30 min, then warmed to room temperature and stirred overnight. The reaction mixture was poured into cold 10% aq citric acid and extracted with EtOAc. The combined organic layers were washed with satd aq NaHCO<sub>3</sub>, brine, dried, and concentrated. The crude residue was subjected to flash column chromatography (SiO<sub>2</sub>, 5-30% ethyl acetate in hexanes) to afford the product as a white amorphous solid (1.15 g, 74%).  $[\alpha]_D^{24} + 29$  (c 0.43, CHCl<sub>3</sub>);  $R_f = 0.42$  (30% EtOAc/hexanes); IR (film) 3330, 2957, 2932, 2861, 1739, 1692, 1525, 1456, 1368, 1154, 1091, 1047 cm<sup>-1</sup>; <sup>1</sup>H NMR (600 MHz, CDCl<sub>3</sub>)  $\delta$  7.37-7.32 (series of m, 5H), 6.72 (br m, 1H), 5.15-3.77 (series of m, 4H), 3.03-2.71 (series of m, 3H), 1.82 (br m, 1H), 1.65 (br m, 1H), 1.48-1.43 (series of m, 9H), 1.32-1.23 (series of m, 9H), 0.85 (br t,  $J = 6.9$  Hz, 3H); <sup>13</sup>C NMR (150 MHz, CDCl<sub>3</sub>) ppm 172.8, 172.2, 159.9, 130.7, 129.1, 128.9, 128.7, 81.0, 67.6, 52.8, 46.3, 32.7, 31.9, 30.4, 25.6, 25.5, 24.9, 23.0, 14.5; HRMS (EI): Exact mass calcd for C<sub>23</sub>H<sub>37</sub>N<sub>2</sub>O<sub>5</sub> [M+H]<sup>+</sup> 421.2702, found 421.2684. MPT-4-135

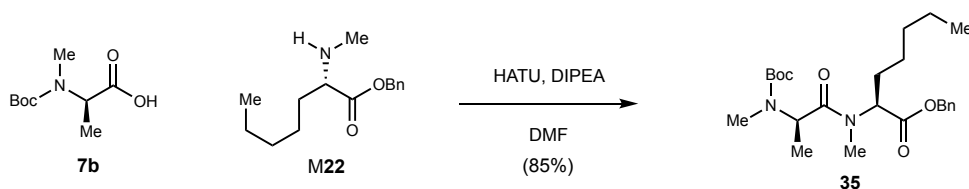

**Benzyl (S)-2-((R)-2-((tert-butoxycarbonyl)(methylamino)-N-methylpropanamido)heptanoate (35).** A round-bottom flask was charged with the amine (900 mg, 3.61 mmol), acid (734 mg, 3.61 mmol), and DMF (36.1 mL). The mixture was cooled to 0 °C and then DIPEA (1.89 mL, 10.8 mmol) and HATU (4.11 g, 10.8 mmol) were added. The reaction was stirred at 0 °C for 30 min, then warmed to room temperature and stirred overnight. The reaction mixture was poured into cold 10% aq citric acid and extracted with EtOAc. The combined organic layers were washed with satd aq NaHCO<sub>3</sub>, ice water, dried, and concentrated. The crude residue was subjected to flash column chromatography (SiO<sub>2</sub>, 5-20% ethyl acetate in hexanes) to afford the product as a white amorphous solid (1.33 g, 85%).  $[\alpha]_D^{23} + 50$  (c 0.34, CHCl<sub>3</sub>);  $R_f = 0.20$  (10% EtOAc/hexanes); IR (film) 2957, 2931, 2861, 1740, 1659, 1456, 1390, 1156 cm<sup>-1</sup>; <sup>1</sup>H NMR (600 MHz, CDCl<sub>3</sub>)  $\delta$  7.37-7.29 (series of m, 5H), 5.25-4.51 (series of m, 4H), 2.92-2.55 (series of m, 6H), 1.98 (m, 1H), 1.69 (m, 1H), 1.46 (s, 9H), 1.34-1.20 (series of m, 9H), 0.88 (t,  $J = 6.0$  Hz, 3H); <sup>13</sup>C NMR (150 MHz, CDCl<sub>3</sub>) ppm 171.9, 171.3, 155.3, 135.6, 128.6, 128.4, 128.2, 80.0, 66.9, 56.9, 50.9, 31.3, 30.5, 29.0, 28.7, 28.4, 28.0, 25.7, 22.4, 13.9; HRMS (EI): Exact mass calcd for C<sub>24</sub>H<sub>38</sub>N<sub>2</sub>NaO<sub>5</sub> [M+Na]<sup>+</sup> 457.2678, found 457.2675. MPT-3-032



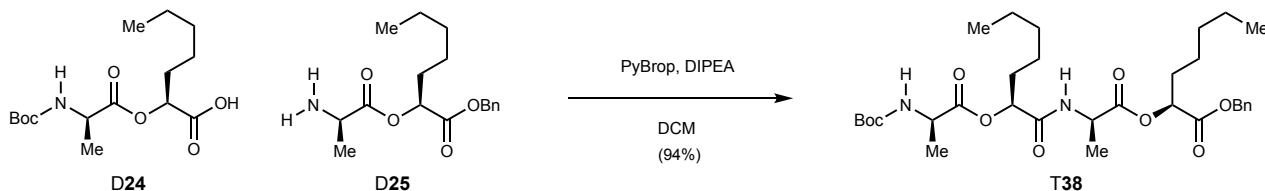

**Benzyl (*R*)-2-(((6*R*,9*R*,12*R*)-2,2,5,6,11,12-hexamethyl-4,7,10-trioxo-9-pentyl-3,8-dioxa-5,11-diazatridecan-13-oyl)oxy)heptanoate (T38).** A round-bottom flask was charged with the amine (402 mg, 1.31 mmol), acid (415 mg, 1.31 mmol), and DCM (12.0 mL). The mixture was cooled to 0 °C and then DIPEA (683  $\mu$ L, 3.92 mmol) and PyBrop (638 mg, 1.31 mmol) were added. The reaction was stirred at 0 °C for 1 h. The reaction mixture was poured into cold 10% aq citric acid and extracted with DCM. The combined organic layers were washed with satd aq NaHCO<sub>3</sub>, brine, dried, and concentrated. The crude residue was subjected to flash column chromatography (SiO<sub>2</sub>, 5-50% ethyl acetate in hexanes) to afford the product as a light yellow oil (745 mg, 94%).  $[\alpha]_D^{24}$   $-20.1$  (*c* 0.62, CHCl<sub>3</sub>);  $R_f$  = 0.52 (30% EtOAc/hexanes); IR (film) 3312, 2956, 2930, 2861, 1747, 1692, 1530, 1455, 1367, 1255, 1160, 1069 cm<sup>-1</sup>; <sup>1</sup>H NMR (600 MHz, CDCl<sub>3</sub>)  $\delta$  7.40-7.35 (series of m, 5H), 7.05 (br d, *J* = 5.3 Hz, 1H), 5.27-5.16 (series of m, 3H), 5.11 (br t, *J* = 6.5 Hz, 1H), 4.99 (br d, *J* = 5.3 Hz, 1H), 4.69 (dd, *J* = 7.1, 7.1 Hz, 1H), 4.25 (dd, *J* = 7.1, 7.1 Hz, 1H), 1.99-1.93 (b m, 1H), 1.88-1.80 (br m, 3H), 1.49-1.43 (series of m, 14H), 1.39-1.28 (series of m, 13H), 0.90-0.88 (series of m, 6H); <sup>13</sup>C NMR (150 MHz, CDCl<sub>3</sub>) ppm 173.4, 172.5, 170.3, 169.9, 156.0, 135.9, 129.2, 129.0, 128.9, 128.8, 80.9, 74.9, 73.5, 67.9, 67.6, 50.4, 48.7, 32.2, 31.9, 31.8, 31.6, 28.9, 25.3, 23.0, 22.9, 18.2, 18.0, 14.5; HRMS (EI): Exact mass calcd for C<sub>32</sub>H<sub>50</sub>N<sub>2</sub>O<sub>9</sub>Na [M+Na]<sup>+</sup> 629.3414, found 629.3409. MPT-2-151.

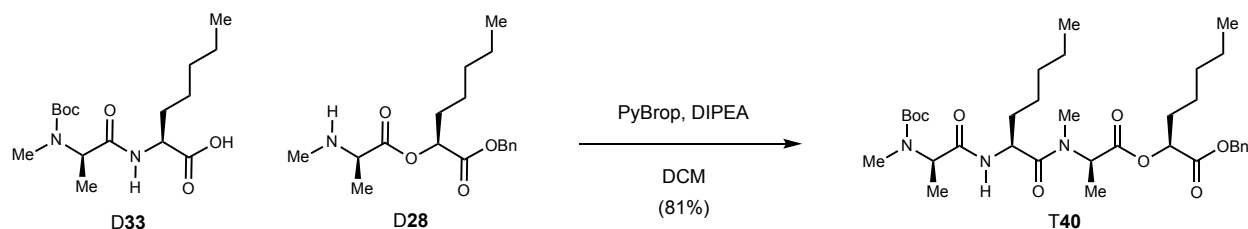

**(*S*)-1-(benzyloxy)-1-oxoheptan-2-yl ((6*R*,9*S*,12*R*)-2,2,5,6,11,12-hexamethyl-4,7,10-trioxo-9-pentyl-3-oxa-5,8,11-triazatridecan-13-oate (T40).** A round-bottom flask was charged with the amine (122 mg, 378  $\mu$ mol), acid (125 mg, 378  $\mu$ mol), and DCM (7.0 mL). The mixture was cooled to 0 °C and then DIPEA (198  $\mu$ L, 1.13 mmol) and PyBrop (277 mg, 567  $\mu$ mol) were added. The reaction was stirred at 0 °C for 30 min, then warmed to 23 °C for 2 h. The reaction mixture was poured into cold 10% aq citric acid and extracted with DCM. The combined organic layers were washed with satd aq NaHCO<sub>3</sub>, brine, dried, and concentrated. The crude residue was subjected to flash column chromatography (SiO<sub>2</sub>, 5-30% ethyl acetate in hexanes) to afford the product as a light yellow oil (195 mg, 81%).  $[\alpha]_D^{24}$   $+19$  (*c* 0.83, CHCl<sub>3</sub>);  $R_f$  = 0.36 (30% EtOAc/hexanes); IR (film) 2954, 2926, 2857, 1746, 1691, 1650, 1456, 1368, 1319, 1155, 1021 cm<sup>-1</sup>; <sup>1</sup>H NMR (600 MHz, CDCl<sub>3</sub>)  $\delta$  7.33-7.25 (series of m, 5H), 6.75 (br d, *J* = 7.3 Hz, 1H), 5.21-5.10 (series of m, 2H), 5.05 (m, 1H), 4.97 (br m, 1H), 4.86 (dt, *J* = 8.0, 7.9 Hz, 1H), 4.77 (m, 1H), 3.28-2.72 (series of m, 6H), 1.94 (br m, 1H), 1.81-1.72 (series of m, 3H), 1.69-1.61 (series of m, 2H), 1.44 (br s, 9H), 1.34-1.31 (br series of m, 4H), 1.27-1.17 (series of m, 12H), 0.90-0.88 (br t, *J* = 6.8 Hz, 3H), 0.90-0.88 (br t, *J* = 6.2 Hz, 3H); <sup>13</sup>C NMR (150 MHz, CDCl<sub>3</sub>) ppm 171.1, 170.9, 169.8, 169.3, 153.2, 135.2, 128.7, 128.5, 128.3, 80.6, 73.4, 73.0, 67.3, 67.0, 55.0, 52.6, 49.1, 32.8, 31.6, 31.2, 30.8, 29.7, 29.4, 28.4, 24.8, 24.6, 22.5, 22.3, 14.4, 13.9; HRMS (EI): Exact mass calcd for C<sub>34</sub>H<sub>59</sub>N<sub>4</sub>O<sub>8</sub> [M+NH<sub>4</sub>]<sup>+</sup> 651.4327, found 651.4327. MPT-2-196

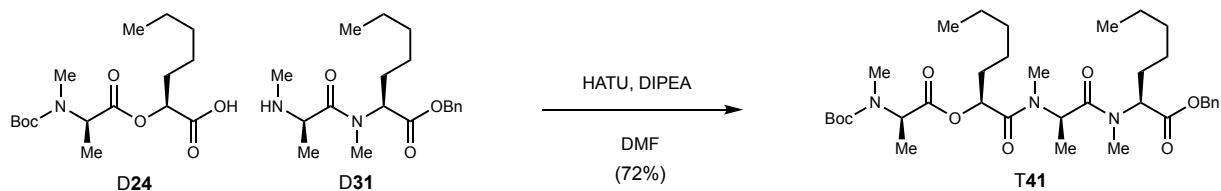

**Benzyl (S)-2-((6R,9S,12R)-N,2,2,5,6,11,12-heptamethyl-4,7,10-trioxo-9-pentyl-3,8-dioxa-5,11-diazatridecan-13-amido)heptanoate (T41).** A round-bottom flask was charged with the amine (158 mg, 474  $\mu\text{mol}$ ), acid (157 mg, 474  $\mu\text{mol}$ ), and DMF (4.7 mL). The mixture was cooled to 0  $^{\circ}\text{C}$  and then DIPEA (248  $\mu\text{L}$ , 1.42 mmol) and HATU (540 mg, 1.42 mmol) were added. The reaction was stirred at 0  $^{\circ}\text{C}$  for 30 min, then warmed to 23  $^{\circ}\text{C}$  for 18 h. The reaction mixture was poured into cold 10% aq citric acid and extracted with EtOAc. The combined organic layers were washed with satd aq  $\text{NaHCO}_3$ , brine, dried, and concentrated. The crude residue was subjected to flash column chromatography ( $\text{SiO}_2$ , 5-40% ethyl acetate in hexanes) to afford the product as a light yellow foam (222 mg, 72%).  $[\alpha]_D^{24} + 65$  (c 0.87,  $\text{CHCl}_3$ );  $R_f = 0.33$  (25% EtOAc/hexanes); IR (film) 2955, 2930, 2860, 1739, 1699, 1657, 1456, 1367, 1316, 1256, 1154  $\text{cm}^{-1}$ ;  $^1\text{H}$  NMR (600 MHz,  $\text{CDCl}_3$ )  $\delta$  7.38-7.32 (series of m, 5H), 5.47 (br m, 1H), 5.26 (br dd,  $J = 6.5, 6.5$  Hz, 1H), 5.13 (m, 2H), 4.97 (dd,  $J = 8.0, 8.0$  Hz, 1H), 2.92-2.60 (series of m, 9H), 2.03 (m, 1H), 1.91 (m, 1H), 1.73 (m, 1H), 1.61 (m, 1H), 1.49 (s, 9H) 1.40-1.19 (series of m, 18H), 0.90 (br t,  $J = 6.7$  Hz, 3H), 0.88 (br t,  $J = 6.5$  Hz, 3H);  $^{13}\text{C}$  NMR (150 MHz,  $\text{CDCl}_3$ ) ppm 172.2, 171.2, 170.8, 168.9, 156.1, 135.4, 128.9, 128.6, 128.4, 79.9, 71.3, 68.0, 67.2, 66.9, 57.9, 56.8, 54.4, 50.0, 31.3, 31.4, 30.3, 29.9, 29.1, 28.4, 27.7, 25.6, 24.9, 22.4, 21.9, 14.4, 14.0; HRMS (EI): Exact mass calcd for  $\text{C}_{35}\text{H}_{58}\text{N}_3\text{O}_8$   $[\text{M}+\text{H}]^+$  648.4218, found 648.4216. MPT-3-006

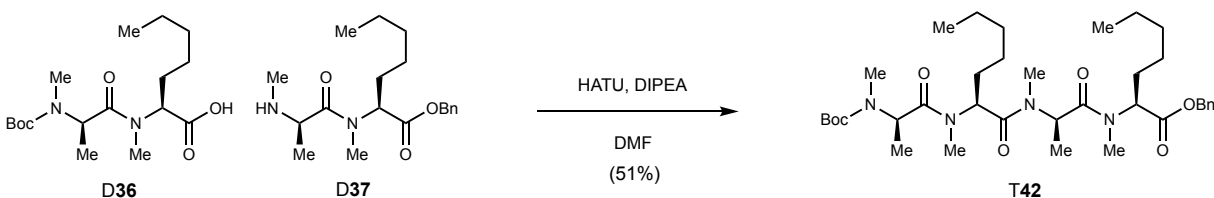

**Benzyl (6R,9S,12R,15S)-2,2,5,6,8,11,12,14-octamethyl-4,7,10,13-tetraoxo-9,15-dipentyl-3-oxa-5,8,11,14-tetraazahexadecan-16-oate (T42).** A round-bottom flask was charged with the amine (200 mg, 581  $\mu\text{mol}$ ), acid (200 mg, 581  $\mu\text{mol}$ ), and DMF (5.8 mL). The mixture was cooled to 0  $^{\circ}\text{C}$  and then DIPEA (304  $\mu\text{L}$ , 1.74 mmol) and HATU (662 g, 2.76 mmol) were added. The reaction was stirred at 0  $^{\circ}\text{C}$  for 30 min, then warmed to 23  $^{\circ}\text{C}$  for 18 h. The reaction mixture was poured into cold 10% aq citric acid and extracted with EtOAc. The combined organic layers were washed with satd aq  $\text{NaHCO}_3$ , brine, dried, and concentrated. The crude residue was subjected to flash column chromatography ( $\text{SiO}_2$ , 5-40% ethyl acetate in hexanes) to afford the product as a light yellow oil (196 mg, 51%).  $[\alpha]_D^{24} + 25$  (c 0.29,  $\text{CHCl}_3$ );  $R_f = 0.24$  (30% EtOAc/hexanes); IR (film) 2956, 2931, 2860, 1742, 1691, 1650, 1456, 1390, 1321, 1156, 1078  $\text{cm}^{-1}$ ;  $^1\text{H}$  NMR (600 MHz,  $\text{CDCl}_3$ )  $\delta$  7.39-7.27 (series of m, 5H), 5.50 (m, 1H), 5.39 (m, 1H), 5.20-5.06 (series of m, 3H), 4.65 (m, 1H), 3.20-2.66 (series of m, 12H), 1.99 (m, 1H), 1.81-1.60 (series of m, 5H), 1.49 (s, 9H), 1.37-1.21 (series of m, 16H), 0.90-0.86 (series of m, 6H);  $^{13}\text{C}$  NMR (150 MHz,  $\text{CDCl}_3$ ) ppm 172.2, 171.8, 171.4, 170.9, 155.3, 135.5, 128.6, 128.2, 128.1, 80.3, 79.9, 66.8, 58.8, 56.5, 53.0, 52.1, 50.8, 49.6, 31.5, 31.2, 31.1, 30.4, 29.8, 29.3, 29.1, 28.9, 28.0, 25.6, 22.4, 22.3, 14.6, 13.9; HRMS (EI): Exact mass calcd for  $\text{C}_{36}\text{H}_{61}\text{N}_4\text{O}_7$   $[\text{M}+\text{H}]^+$  661.4540, found 661.4537. MPT-4-300

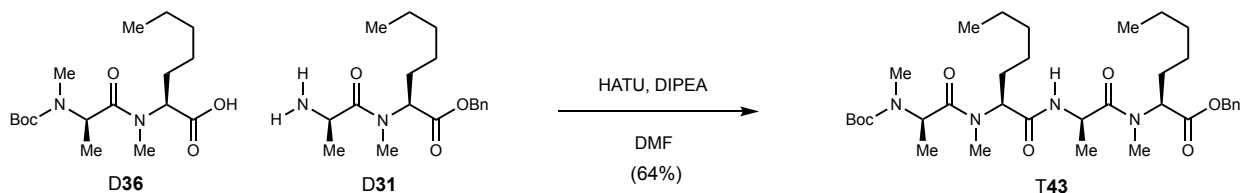

**Benzyl** **(6R,9S,12R,15S)-2,2,5,6,8,12,14-heptamethyl-4,7,10,13-tetraoxo-9,15-dipentyl-3-oxa-5,8,11,14-tetraazahexadecan-16-oate (T43)**. A round-bottom flask was charged with the amine (172 mg, 537  $\mu$ mol), acid (185 mg, 537  $\mu$ mol), and DMF (4.0 mL). The mixture was cooled to 0 °C and then DIPEA (281  $\mu$ L, 1.61 mmol) and HATU (613 mg, 1.61 mmol) were added. The reaction was stirred at 0 °C for 30 min, then warmed to 23 °C for 18 h.. The reaction mixture was poured into cold 10% aq citric acid and extracted with EtOAc. The combined organic layers were washed with satd aq NaHCO<sub>3</sub>, brine, dried, and concentrated. The crude residue was subjected to flash column chromatography (SiO<sub>2</sub>, 5-30% ethyl acetate in hexanes) to afford the product as a light yellow oil (221 mg, 64%).  $[\alpha]_D^{24} + 2.9$  (c 0.68, CHCl<sub>3</sub>);  $R_f = 0.23$  (25% EtOAc/hexanes); IR (film) 3330, 2957, 2929, 2859, 1741, 1682, 1455, 1367, 1254, 1152, 1081 cm<sup>-1</sup>; <sup>1</sup>H NMR (600 MHz, CDCl<sub>3</sub>)  $\delta$  7.39-7.30 (series of m, 5H), 7.00 (br s, 1H), 5.44-3.74 (series of m, 6H) 3.23-2.69 (series of m, 9H), 1.98 (m, 1H), 1.74 (m, 1H), 1.56 (m, 1H), 1.46 (m, 9H), 1.36-1.22 (series of m, 19H), 0.89-0.86 (series of m, 3H); <sup>13</sup>C NMR (150 MHz, CDCl<sub>3</sub>) This compound exists in multiple conformations, causing significant peak overlap. Refer to image of the 13C NMR spectrum; HRMS (EI): Exact mass calcd for C<sub>35</sub>H<sub>62</sub>N<sub>5</sub>O<sub>7</sub> [M+NH<sub>4</sub>]<sup>+</sup> 664.4644, found 664.4642. MPT-3-056

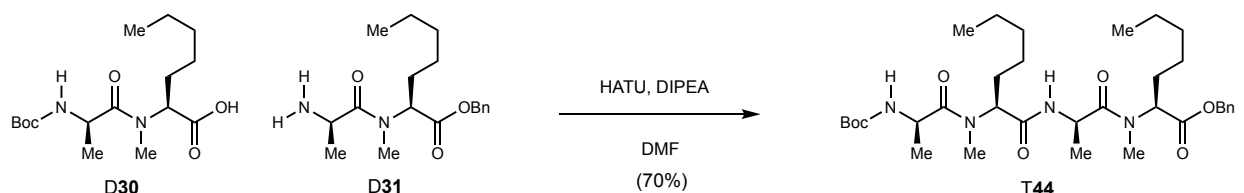

**Benzyl** **(6R,9S,12R,15S)-2,2,6,8,12,14-hexamethyl-4,7,10,13-tetraoxo-9,15-dipentyl-3-oxa-5,8,11,14-tetraazahexadecan-16-oate (T44)**. A round-bottom flask was charged with the amine (400 mg, 1.21 mmol), acid (400 mg, 1.21 mmol), and DMF (3.0 mL). The mixture was cooled to 0 °C and then DIPEA (633  $\mu$ L, 3.63 mmol) and HATU (1.38 g, 3.63 mmol) were added. The reaction was stirred at 0 °C for 30 min, then warmed to 23 °C for 18 h. The reaction mixture was poured into cold 10% aq citric acid and extracted with EtOAc. The combined organic layers were washed with satd aq NaHCO<sub>3</sub>, brine, dried, and concentrated. The crude residue was subjected to flash column chromatography (SiO<sub>2</sub>, 5-30% ethyl acetate in hexanes) to afford the product as a light yellow oil (536 mg, 70%).  $[\alpha]_D^{24} - 31$  (c 0.57, CHCl<sub>3</sub>);  $R_f = 0.13$  (25% EtOAc/hexanes); IR (film) 3300, 2956, 2931, 2860, 1741, 1713, 1643, 1518, 1455, 1367, 1247, 1170, 1091 cm<sup>-1</sup>; <sup>1</sup>H NMR (600 MHz, CDCl<sub>3</sub>)  $\delta$  7.39-7.30 (series of m, 5H), 7.01 (series of m, 2H), 5.33-4.14 (series of m, 6H), 3.33-2.82 (series of m, 6H), 1.98 (m, 2H), 1.71 (m, 2H), 1.55 (m, 1H), 1.44 (s, 9H), 1.35-1.23 (series of m, 17H), 0.91-0.88 (series of m, 6H); <sup>13</sup>C NMR (150 MHz, CDCl<sub>3</sub>) ppm 173.2, 171.8, 171.6, 170.9, 151.7, 135.5, 128.7, 128.2, 127.8, 79.9, 79.5, 66.9, 59.6, 56.6, 52.3, 50.2, 47.0, 45.6, 45.6, 36.7, 31.4, 31.3, 31.1, 30.4, 29.7, 29.4, 28.3, 25.7, 25.4, 22.4, 14.0, 13.9; HRMS (EI): Exact mass calcd for C<sub>34</sub>H<sub>57</sub>N<sub>4</sub>O<sub>7</sub> [M+H]<sup>+</sup> 633.4227, found 633.4222. MPT-4-057

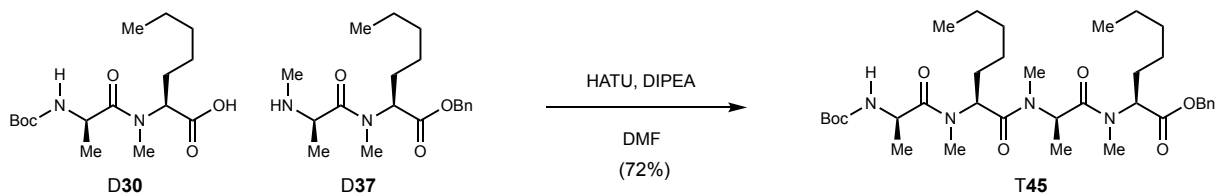

**Benzyl (6R,9S,12R,15S)-2,2,6,8,11,12,14-heptamethyl-4,7,10,13-tetraoxo-9,15-dipentyl-3-oxa-5,8,11,14-tetraazahexadecan-16-oate (T45).** A round-bottom flask was charged with the amine (300 mg, 909  $\mu\text{mol}$ ), acid (300 mg, 909  $\mu\text{mol}$ ), and DMF (1.0 mL). The mixture was cooled to 0 °C and then DIPEA (475  $\mu\text{L}$ , 2.72 mmol) and HATU (1.03 g, 2.72 mmol) were added. The reaction was stirred at 0 °C for 30 min, then warmed to 23 °C for 18 h.. The reaction mixture was poured into cold 10% aq citric acid and extracted with EtOAc. The combined organic layers were washed with satd aq  $\text{NaHCO}_3$ , brine, dried, and concentrated. The crude residue was subjected to flash column chromatography ( $\text{SiO}_2$ , 5-30% ethyl acetate in hexanes) to afford the product as a light yellow foam (423 mg, 72%).  $[\alpha]_D^{24} + 7.8$  (c 0.43,  $\text{CHCl}_3$ );  $R_f = 0.23$  (25% EtOAc/hexanes); IR (film) 2956, 2930, 2860, 1739, 1712, 1643, 1456, 1405, 1247, 1079  $\text{cm}^{-1}$ ;  $^1\text{H}$  NMR (600 MHz,  $\text{CDCl}_3$ )  $\delta$  7.36-7.30 (series of m, 5H), 5.50 (m, 2H), 5.22-5.06 (series of m, 3H), 4.61 (m, 1H), 3.00-2.75 (series of m, 9H), 1.98 (br m, 1H), 1.79-1.64 (br series of m, 4H), 1.42 (br s, 9H), 1.32-1.21 (series of m, 15H), 0.88 (br m, 6H);  $^{13}\text{C}$  NMR (150 MHz,  $\text{CDCl}_3$ ) ppm 173.1, 172.0, 171.1, 170.3, 155.1, 135.6, 128.0, 128.4, 128.2, 79.5, 67.0, 57.0, 56.7, 56.5, 52.9, 52.1, 49.9, 49.6, 31.5, 31.2, 30.2, 30.0, 29.3, 28.9, 28.0, 25.8, 22.5, 22.4, 18.8, 14.5, 13.9; HRMS (EI): Exact mass calcd for  $\text{C}_{35}\text{H}_{59}\text{N}_4\text{O}_7$   $[\text{M}+\text{H}]^+$  647.4384, found 646.4388. MPT-4-159

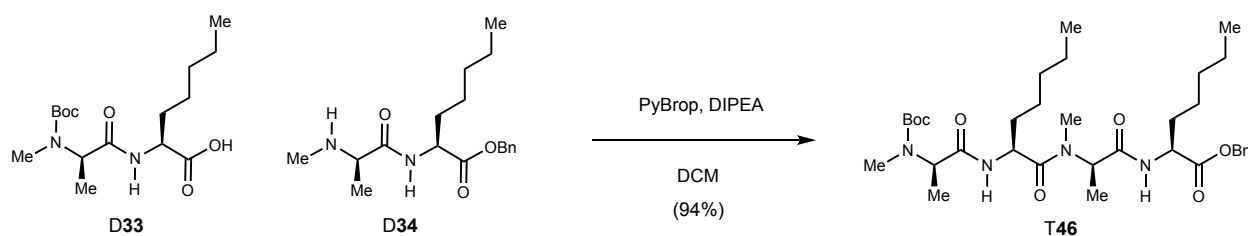

**Benzyl (6R,9S,12R,15S)-2,2,5,6,11,12-hexamethyl-4,7,10,13-tetraoxo-9,15-dipentyl-3-oxa-5,8,11,14-tetraazahexadecan-16-oate (T46).** A round-bottom flask was charged with the amine (254 mg, 793  $\mu\text{mol}$ ), acid (262 mg, 793  $\mu\text{mol}$ ), and DCM (7.0 mL). The mixture was cooled to 0 °C and then DIPEA (414  $\mu\text{L}$ , 2.38 mmol) and PyBrop (581 mg, 1.19 mmol) were added. The reaction was stirred at 0 °C for 30 min, then warmed to 23 °C for 2 h. The reaction mixture was poured into cold 10% aq citric acid and extracted with DCM. The combined organic layers were washed with satd aq  $\text{NaHCO}_3$ , brine, dried, and concentrated. The crude residue was subjected to flash column chromatography ( $\text{SiO}_2$ , 5-30% ethyl acetate in hexanes) to afford the product as a light yellow oil (611 mg, 94%).  $[\alpha]_D^{24} + 36$  (c 0.86,  $\text{CHCl}_3$ );  $R_f = 0.26$  (30% EtOAc/hexanes); IR (film) 3318, 2956, 2931, 2860, 1742, 1661, 1530, 1456, 1367, 1256, 1154, 1090  $\text{cm}^{-1}$ ;  $^1\text{H}$  NMR (600 MHz,  $\text{CDCl}_3$ )  $\delta$  7.41-7.28 (series of m, 7H), 7.00 (br s, 1H), 6.70 (br s, 1H), 5.26 (br m, 1H), 5.13 (d,  $J = 12.1$  Hz, 1H), 5.00 (d,  $J = 12.1$  Hz, 1H), 4.71 (br m, 1H), 4.46 (m, 2H), 2.86-2.56 (series of m, 6H), 1.79 (br m, 1H), 1.64 (br m, 1H), 1.54 (br m, 1H), 1.43 (s, 9H), 1.37 (m, 3H), 1.27-1.17 (series of m, 16H), 0.83 (br t,  $J = 6.1$  Hz, 3H), 0.78 (br t,  $J = 6.3$  Hz, 3H);  $^{13}\text{C}$  NMR (150 MHz,  $\text{CDCl}_3$ ) ppm 172.5, 172.4, 172.0, 170.6, 161.0, 134.9, 128.7, 128.6, 128.5, 79.9, 68.9, 52.5, 52.0, 50.0, 42.2, 32.0, 31.9, 31.6, 31.5, 31.2, 30.8, 30.7, 29.9, 29.7, 29.4, 25.4, 25.0, 22.4, 14.0, 13.4; HRMS (EI): Exact mass calcd for  $\text{C}_{34}\text{H}_{60}\text{N}_5\text{O}_7$   $[\text{M}+\text{NH}_4]^+$  650.4493, found 650.4487. MPT-2-193

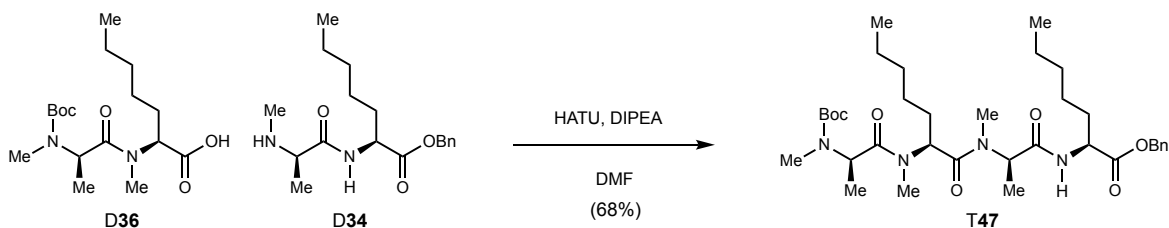

**Benzyl (6R,9S,12R,15S)-2,2,5,6,8,11,12-heptamethyl-4,7,10,13-tetraoxo-9,15-dipentyl-3-oxa-5,8,11,14-tetraazahexadecan-16-oate (T47).** A round-bottom flask was charged with the amine (171 mg, 535  $\mu\text{mol}$ ), acid (184 mg, 535  $\mu\text{mol}$ ), and DMF (5.4 mL). The mixture was cooled to 0 °C and then DIPEA (283.3  $\mu\text{L}$ , 1.61 mmol) and HATU (610 mg, 1.61 mol) were added. The reaction was stirred at 0 °C for 30 min, then warmed to 23 °C for 18 h. The reaction mixture was poured into cold 10% aq citric acid and extracted with EtOAc. The combined organic layers were washed with satd aq  $\text{NaHCO}_3$ , brine, dried, and concentrated. The crude residue was subjected to flash column chromatography ( $\text{SiO}_2$ , 5-35% ethyl acetate in hexanes) to afford the product as a yellow foam (235 mg, 68%).  $[\alpha]_D^{24} + 24$  (c 0.34,  $\text{CHCl}_3$ );  $R_f = 0.31$  (25% EtOAc/hexanes); IR (film) 3448, 2956, 2929, 2810, 1745, 1701, 1686, 1473, 1389, 1259, 1182, 1087  $\text{cm}^{-1}$ ;  $^1\text{H}$  NMR (600 MHz,  $(\text{CD}_3)_2\text{CO}$ )  $\delta$  7.45-7.27 (series of m, 5H), 7.04 (br m, 1H), 5.33-4.53 (series of m, 6H), 3.07-2.69 (series of m, 9H), 2.01-1.78 (series of m, 3H), 1.62 (m, 1H), 1.45 (m, 9H), 1.37-1.16 (series of m, 18H), 0.93-0.83 (series of m, 6H);  $^{13}\text{C}$  NMR (150 MHz,  $\text{CDCl}_3$ ) ppm 173.2, 171.9, 171.2, 170.5, 155.3, 135.6, 128.7, 128.4, 128.1, 79.5, 67.0, 66.8, 56.9, 56.3, 53.1, 52.2, 49.6, 46.9, 31.5, 31.2, 30.2, 29.9, 28.9, 28.3, 27.9, 25.7, 25.4, 22.4, 18.9, 14.4, 13.9; HRMS (EI): Exact mass calcd for  $\text{C}_{35}\text{H}_{58}\text{N}_4\text{NaO}_7$   $[\text{M}+\text{Na}]^+$  647.4384, found 647.4388. MPT-4-156

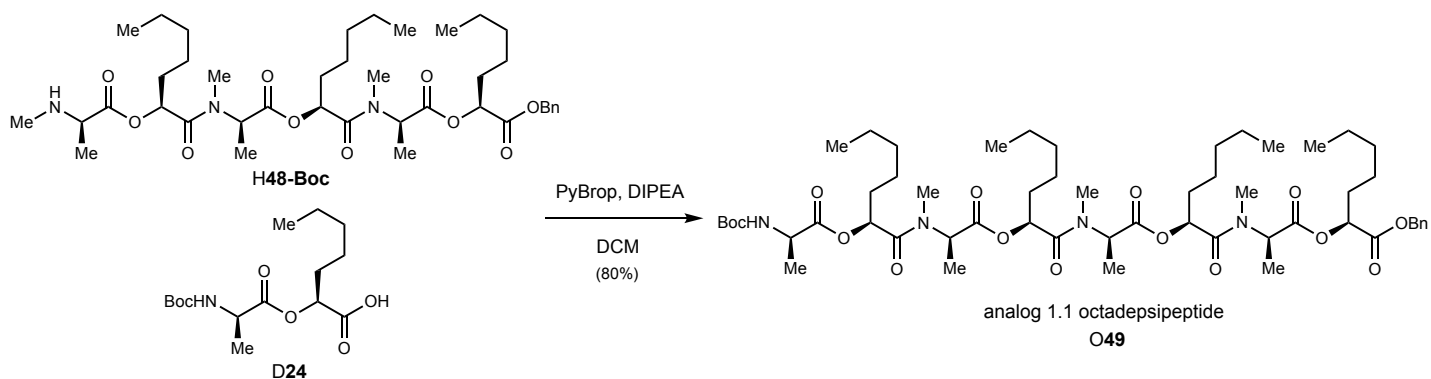

**Benzyl (S)-2-(((6R,9S,12R,15S,18R,21S,24R)-2,2,6,11,12,17,18,23,24-nonamethyl-4,7,10,13,16,19,22-heptaaxo-9,15,21-tripentyl-3,8,14,20-tetraoxa-5,11,17,23-tetraazapentacosan-25-oyl)oxy)heptanoate (O49).** A round-bottom flask was charged with the amine (141 mg, 189  $\mu\text{mol}$ ), acid (66.0 mg, 189  $\mu\text{mol}$ ), and DCM (1.8 mL). The mixture was cooled to 0 °C and then DIPEA (98.8  $\mu\text{L}$ , 567  $\mu\text{mol}$ ) and PyBrop (92.3 mg, 189  $\mu\text{mol}$ ) were added. The reaction was stirred at 0 °C for 30 min, then allowed to warm to ambient temperature and stir for an additional 1.5 h. The reaction mixture was poured into cold 10% aq citric acid and extracted with DCM. The combined organic layers were washed with satd aq  $\text{NaHCO}_3$ , brine, dried, and concentrated. The crude residue was subjected to flash column chromatography ( $\text{SiO}_2$ , 10-60% ethyl acetate in hexanes) to afford the product as a light yellow oil (158 mg, 80%).  $[\alpha]_D^{24} + 34$  (c 1.36,  $\text{CHCl}_3$ );  $R_f = 0.40$  (60% EtOAc/hexanes); IR (film) 3302, 2930, 1743, 1663, 1456, 1186  $\text{cm}^{-1}$ ;  $^1\text{H}$  NMR (600 MHz,  $\text{CDCl}_3$ ) This compound exists in multiple conformations, causing significant peak overlap. Refer to image of the  $^1\text{H}$  NMR spectrum;  $^{13}\text{C}$  NMR (150 MHz,  $\text{CDCl}_3$ ) This

compound exists in multiple conformations, causing significant peak overlap. Refer to image of the  $^{13}\text{C}$  NMR spectrum; HRMS (EI): Exact mass calcd for  $\text{C}_{55}\text{H}_{94}\text{N}_5\text{O}_{15}$   $[\text{M}+\text{NH}_4]^+$  1064.6746, found [1064.6742]. MPT-2-166

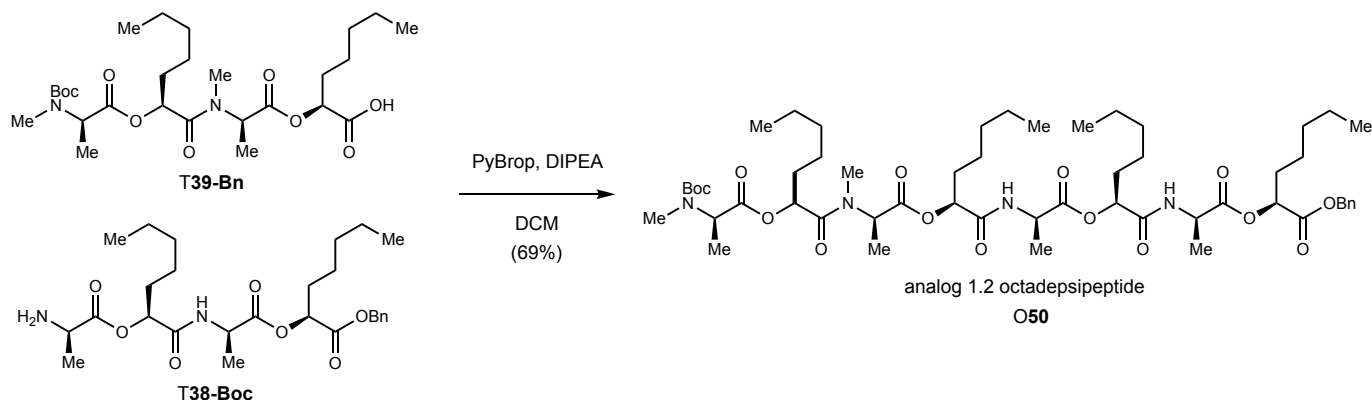

**Benzyl (S)-2-(((6R,9S,12R,15S,18R,21S,24R)-2,2,5,6,11,12,18,24-octamethyl-4,7,10,13,16,19,22-heptaaxo-9,15,21-tripentyl-3,8,14,20-tetraoxa-5,11,17,23-tetraazapentacosan-25-oyl)oxy)heptanoate (O50).** A round-bottom flask was charged with the amine (93.0 mg, 184  $\mu\text{mol}$ ), acid (100 mg, 184  $\mu\text{mol}$ ), and DCM (1.8 mL). The mixture was cooled to 0  $^{\circ}\text{C}$  and then DIPEA (95.9  $\mu\text{L}$ , 551  $\mu\text{mol}$ ) and PyBrop (108 mg, 220  $\mu\text{mol}$ ) were added. The reaction was stirred at 0  $^{\circ}\text{C}$  for 30 min, then allowed to warm to ambient temperature and stir for an additional 1.5 h. The reaction mixture was poured into cold 10% aq citric acid and extracted with DCM. The combined organic layers were washed with satd aq  $\text{NaHCO}_3$ , brine, dried, and concentrated. The crude residue was subjected to flash column chromatography ( $\text{SiO}_2$ , 10-50% ethyl acetate in hexanes) to afford the product as a light-yellow oil (130 mg, 69%).  $[\alpha]_D^{24}$   $-6.5$  (c 0.53,  $\text{CHCl}_3$ );  $R_f$  = 0.21 (30% EtOAc/hexanes); IR (film) 3303, 2956, 2929, 2871, 2860, 1747, 1671, 1538, 1455, 1389, 1210, 1086  $\text{cm}^{-1}$ ;  $^1\text{H}$  NMR (600 MHz,  $\text{CDCl}_3$ )  $\delta$  7.65 (br s, 1H), 7.40 (br d,  $J$  = 7.3 Hz, 1H), 5.21-5.07 (series of m, 7H), 4.91 and 4.07 (br q,  $J$  = 6.9 Hz, 1H), 4.67-4.63 (m, 1H), 4.25-4.20 (m, 1H), 3.19 (br m, 3H), 2.81 (br m, 3H), 1.85-1.68 (series of m, 8H), 1.48-1.43 (series of m, 18H), 1.38 (br s, 9H), 1.32-1.26 (series of m, 18H), 0.89-0.85 (series of m, 12H);  $^{13}\text{C}$  NMR (150 MHz,  $\text{CDCl}_3$ ) This compound is a mixture of rotamers causing significant peak broadening and overlap. Refer to image of the  $^{13}\text{C}$  NMR spectrum; HRMS (EI): Exact mass calcd for  $\text{C}_{54}\text{H}_{88}\text{N}_4\text{NaO}_{15}$   $[\text{M}+\text{Na}]^+$  1055.6144, found 1055.6144. MPT-2-154

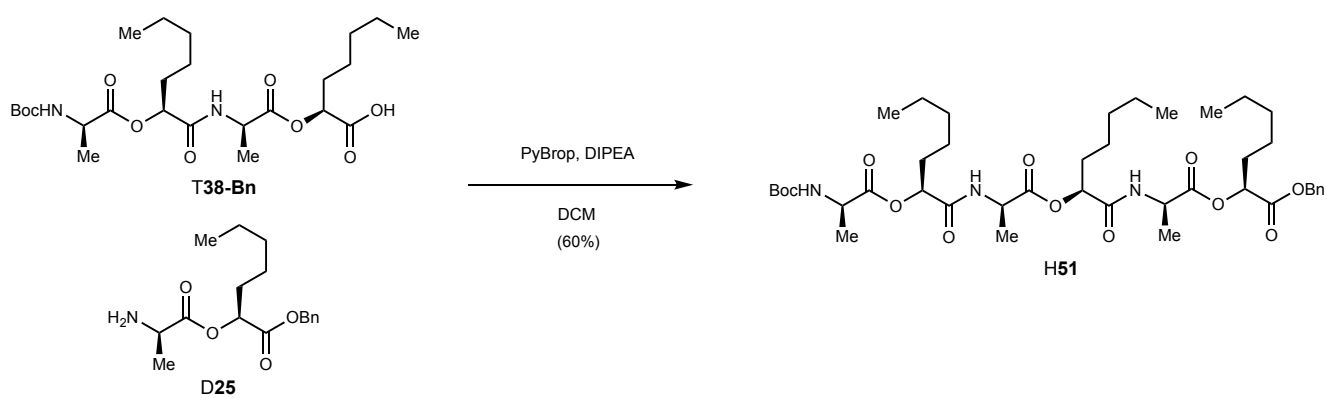

**Benzyl (S)-2-(((6R,9S,12R,15S,18R)-2,2,6,12,18-pentamethyl-4,7,10,13,16-pentaoxo-9,15-dipentyl-3,8,14-trioxo-5,11,17-triazanonadecan-19-oyl)oxy)heptanoate (H51).** A round-bottom flask was charged with the amine (75.0 mg, 244  $\mu\text{mol}$ ), acid (126 mg, 244  $\mu\text{mol}$ ), and DCM (2.4 mL). The mixture was cooled to 0 °C and then DIPEA (128  $\mu\text{L}$ , 732  $\mu\text{mol}$ ) and PyBrop (119 mg, 244  $\mu\text{mol}$ ) were added. The reaction was stirred at 0 °C for 30 min, then allowed to warm to ambient temperature and stir for an additional 1.5 h. The reaction mixture was poured into cold 10% aq citric acid and extracted with DCM. The combined organic layers were washed with satd aq  $\text{NaHCO}_3$ , brine, dried, and concentrated. The crude residue was subjected to flash column chromatography ( $\text{SiO}_2$ , 10-60% ethyl acetate in hexanes) to afford the product as a light yellow oil (117 mg, 60%).  $[\alpha]_D^{24} - 29$  (c 0.32,  $\text{CHCl}_3$ );  $R_f = 0.49$  (30% EtOAc/hexanes); IR (film) 3346, 2956, 2927, 2858, 1751, 1662, 1534, 1457, 1157, 1069  $\text{cm}^{-1}$ ;  $^1\text{H}$  NMR (600 MHz,  $\text{CDCl}_3$ )  $\delta$  7.37-7.31 (series of m, 5H), 5.23-5.14 (series of m, 3H), 5.09 (br t,  $J = 6.3$  Hz, 1H), 5.00 (br d,  $J = 5.4$  Hz, 1H), 4.66 (dd,  $J = 7.4, 7.4$  Hz, 1H), 4.31 (dd,  $J = 6.8, 5.8$  Hz, 1H), 4.14 (dd,  $J = 6.8, 6.8$  Hz, 1H), 1.99-1.95 (series of m, 1H), 1.88-1.78 (series of m, 5H), 1.50 (br d,  $J = 7.6$  Hz, 3H), 1.45 (br d,  $J = 7.4$  Hz, 3H), 1.42 (s, 8H), 1.41 (br d,  $J = 7.6$  Hz, 4H), 1.36-1.25 (series of m, 18H), 0.87 (t,  $J = 6.7$  Hz, 3H), 0.86 (t,  $J = 7.0$  Hz, 3H), 0.85 (t,  $J = 6.6$  Hz, 3H) [three N-H peaks not observed];  $^{13}\text{C}$  NMR (150 MHz,  $\text{CDCl}_3$ ) ppm 173.5, 172.8, 172.6, 171.0, 170.3, 170.0, 156.4, 135.9, 129.1, 128.9, 128.8, 81.1, 74.9, 74.4, 73.4, 67.5, 50.5, 49.8, 48.6, 48.3, 32.2, 31.9, 31.8, 31.6, 30.5, 30.3, 28.8, 25.3, 25.2, 24.8, 23.0, 18.0, 17.5, 16.9, 14.7, 14.6, 14.52, 14.47 HRMS (EI): Exact mass calcd for  $\text{C}_{42}\text{H}_{67}\text{N}_3\text{O}_{12}\text{Na}$   $[\text{M}+\text{Na}]^+$  828.4623, found 828.4622. MPT-2-157

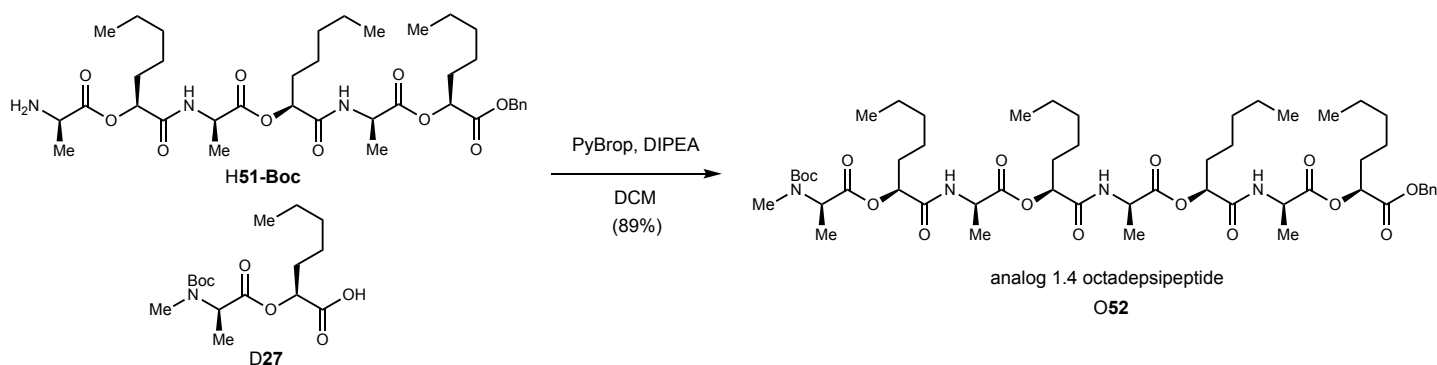

**Benzyl (S)-2-(((6R,9S,12R,15S,18R,21S,24R)-2,2,5,6,12,18,24-heptamethyl-4,7,10,13,16,19,22-heptaoxo-9,15,21-tripentyl-3,8,14,20-tetraoxo-5,11,17,23-tetraazapentacosan-25-oyl)oxy)heptanoate (O52).** A round-bottom flask was charged with the amine (102 mg, 184  $\mu\text{mol}$ ), acid (47 mg, 184  $\mu\text{mol}$ ), and DCM (1.8 mL). The mixture was cooled to 0 °C and then DIPEA (95.0  $\mu\text{L}$ , 540  $\mu\text{mol}$ ) and PyBrop (88.0 mg, 184  $\mu\text{mol}$ ) were added. The reaction was stirred at 0 °C for 30 min, then allowed to warm to ambient temperature and stir for an additional 1.5 h. The reaction mixture was poured into cold 10% aq citric acid and extracted with DCM. The combined organic layers were washed with satd aq  $\text{NaHCO}_3$ , brine, dried, and concentrated. The crude residue was subjected to flash column chromatography ( $\text{SiO}_2$ , 10-60% ethyl acetate in hexanes) to afford the product as a light yellow oil (132 mg, 89%).  $[\alpha]_D^{24} - 21$  (c 0.93,  $\text{CHCl}_3$ );  $R_f = 0.28$  (30% EtOAc/hexanes); IR (film) 3300, 2956, 2930, 2860, 1749, 1665, 1455, 1382, 1156, 1086  $\text{cm}^{-1}$ ;  $^1\text{H}$  NMR (600 MHz,  $\text{CDCl}_3$ )  $\delta$  7.95 (br d,  $J = 4.0$  Hz, 1H), 7.65 (br d,  $J = 4.0$  Hz, 1H), 7.37-7.31 (series of m, 6H), 5.21-3.70 (series of m, 10H), 2.98 (br s, 3H), 1.88-1.77 (series of m, 8H), 1.52 (m, 1H), 1.51-1.43 (series of m, 19H), 1.37-1.32 (series of m, 7H), 1.30-1.24 (series of m, 18H), 0.89-0.85 (series of m, 12H);  $^{13}\text{C}$  NMR (150 MHz,  $\text{CDCl}_3$ ) This compound is a mixture of rotamers causing significant peak broadening and overlap. Refer to the image of the  $^{13}\text{C}$  NMR spectrum; HRMS (EI): Exact mass calcd for  $\text{C}_{53}\text{H}_{86}\text{N}_4\text{NaO}_{15}$   $[\text{M}+\text{Na}]^+$  1041.5988, found 1041.5987. MPT-2-160

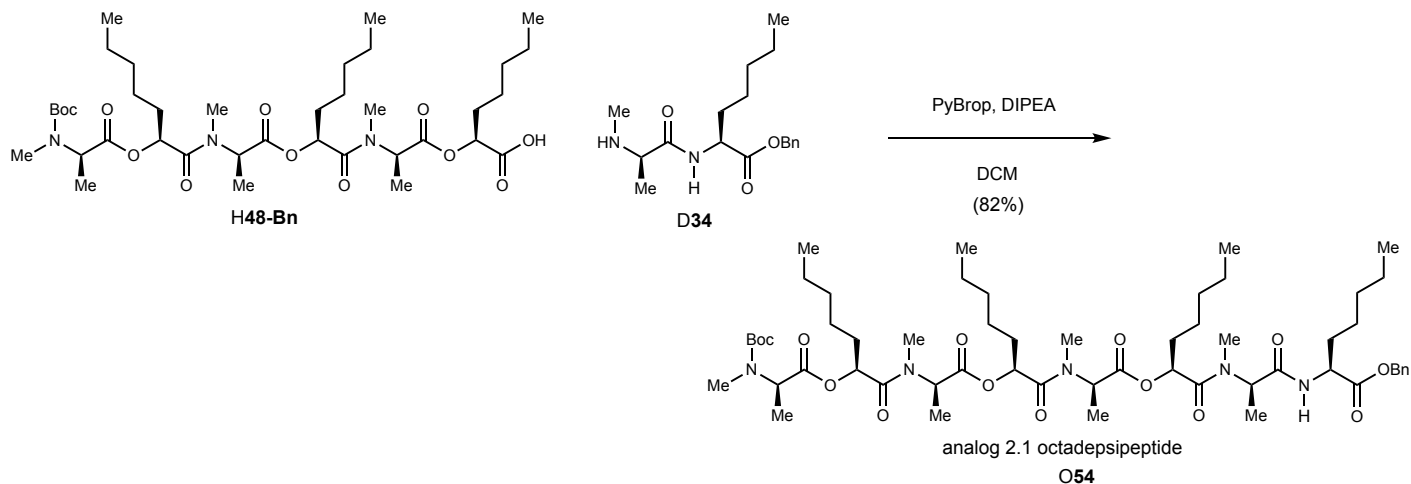

**(4*S*,7*R*,10*S*,13*R*,16*S*)-7,8,13,14-tetramethyl-3,6,9,12,15-pentaoxo-4,10-dipentyl-1-phenyl-2,5,11-trioxa-8,14-diazahenicosan-16-yl (6*R*,9*S*,12*R*)-2,2,5,6,11,12-hexamethyl-4,7,10-trioxa-9-pentyl-3-oxa-5,8,11-triazatridecan-13-oate (O54).** A round-bottom flask was charged with the amine (88.0 mg, 120  $\mu\text{mol}$ ), acid (39.0 mg, 120  $\mu\text{mol}$ ), and DCM (1.2 mL). The mixture was cooled to 0 °C and then DIPEA (61.0  $\mu\text{L}$ , 350  $\mu\text{mol}$ ) and PyBrop (86.0 mg, 180  $\mu\text{mol}$ ) were added. The reaction was stirred at 0 °C for 30 min, then warmed to 23 °C for 2 h. The reaction mixture was poured into cold 10% aq citric acid and extracted with DCM. The combined organic layers were washed with satd aq  $\text{NaHCO}_3$ , brine, dried, and concentrated. The crude residue was subjected to flash column chromatography ( $\text{SiO}_2$ , 5-40% ethyl acetate in hexanes) to afford the product as a light yellow oil (104 mg, 82%).  $[\alpha]_D^{24} + 9.9$  (*c* 0.75,  $\text{CHCl}_3$ );  $R_f = 0.72$  (30% EtOAc/hexanes); IR (film) 2925, 2856, 1746, 1668, 1456, 1377, 1215, 1103  $\text{cm}^{-1}$ ;  $^1\text{H}$  NMR (600 MHz,  $\text{CDCl}_3$ )  $\delta$  7.31-7.24 (series of m, 5H), 6.89 (br s, 1H), 5.19-4.25 (series of m, 10H), 3.09-2.60 (series of m, 12H), 2.23 (m, 1H), 2.00 (m, 1H), 1.84-1.75 (br m, 3H), 1.61-1.56 (series of m, 3H), 1.43-1.40 (series of m, 9H), 1.34-1.30 (series of m, 3H), 1.27-1.24 (series of m, 22H), 1.23-1.20 (series of m, 11H), 0.90-0.88 (series of m, 12H);  $^{13}\text{C}$  NMR (150 MHz,  $\text{CDCl}_3$ ) This compound exists in multiple conformations, causing significant peak overlap. Refer to image of the  $^{13}\text{C}$  NMR spectrum; HRMS (EI): Exact mass calcd for  $\text{C}_{56}\text{H}_{97}\text{N}_6\text{O}_{14}$   $[\text{M}+\text{NH}_4]^+$  1077.7063, found 1077.7058. MPT-2-189

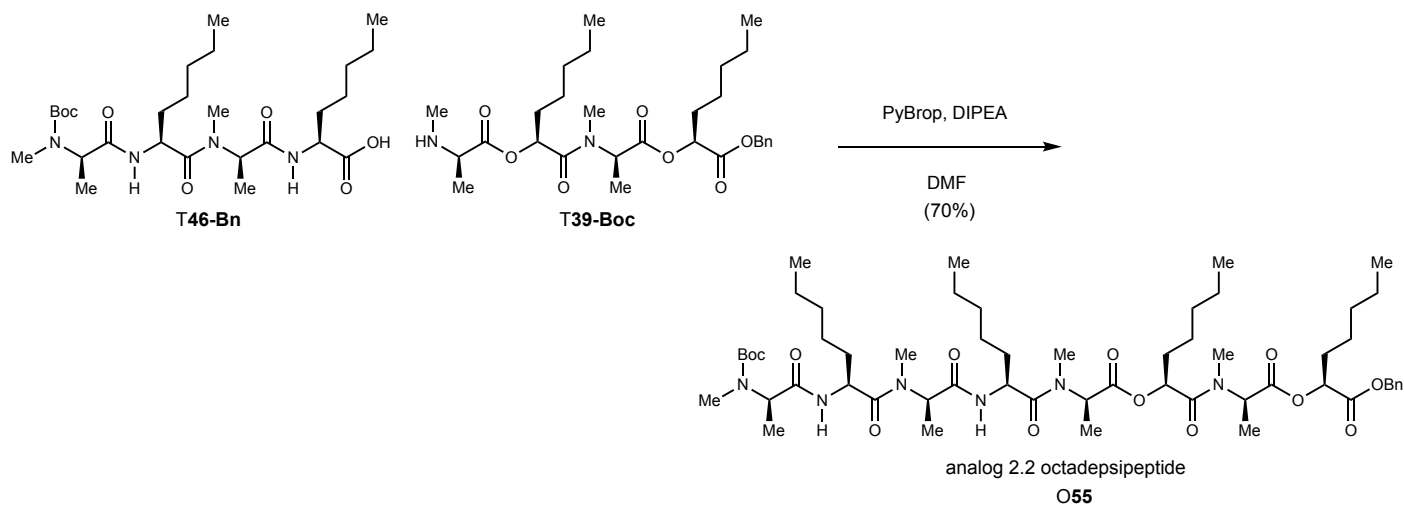



**(S)-1-(((R)-1-(((S)-1-(benzyloxy)-1-oxoheptan-2-yl)oxy)-1-oxopropan-2-yl)(methyl)amino)-1-oxoheptan-2-yl (6R,9S,12R,15S,18R)-2,2,5,6,11,12,17,18-octamethyl-4,7,10,13,16-pentaoxo-9,15-dipentyl-3-oxa-5,8,11,14,17-pentaazanonadecan-19-oate (O55).** A round-bottom flask was charged with the amine (110 mg, 206  $\mu\text{mol}$ ), acid (110 mg, 206  $\mu\text{mol}$ ), and DMF (2.0 mL). The mixture was cooled to 0 °C and then DIPEA (108  $\mu\text{L}$ , 618 mmol) and PyBrop (638 mg, 1.31 mmol) were added. The reaction was stirred at 0 °C for 30 min, then warmed to 23 °C for 2 h. The reaction mixture was poured into cold 10% aq citric acid and extracted with EtOAc. The combined organic layers were washed with satd aq  $\text{NaHCO}_3$ , brine, dried, and concentrated. The crude residue was subjected to flash column chromatography ( $\text{SiO}_2$ , 5-50% ethyl acetate in hexanes) to afford the product as a light yellow oil (150 mg, 70%).  $[\alpha]_D^{24} + 63$  (c 0.64,  $\text{CHCl}_3$ );  $R_f = 0.25$  (30% EtOAc/hexanes); IR (film) 3387, 2956, 2932, 2861, 1742, 1651, 1522, 1457, 1391, 1214, 1154, 1093  $\text{cm}^{-1}$ ;  $^1\text{H}$  NMR (600 MHz,  $\text{CDCl}_3$ )  $\delta$  7.30-7.24 (series of m, 5H), 7.05 (br s, 1H), 5.18-4.98 (series of m, 6H), 4.73-4.36 (series of m, 4H), 2.99-2.71 (series of m, 12H), 1.82-1.73 (series of m, 3H), 1.66-1.56 (series of m, 6H), 1.47-1.41 (series of m, 9H), 1.40-1.34 (series of m, 14H), 1.28-1.18 (series of m, 20H), 0.90-0.88 (series of m, 12H);  $^{13}\text{C}$  NMR (150 MHz,  $\text{CDCl}_3$ ) This compound exists in multiple conformations, causing significant peak overlap. Refer to image of the  $^{13}\text{C}$  NMR spectrum; HRMS (EI): Exact mass calcd for  $\text{C}_{56}\text{H}_{98}\text{N}_7\text{O}_{13}$   $[\text{M}+\text{NH}_4]^+$  1076.7223 found 1076.7217. MPT-2-279

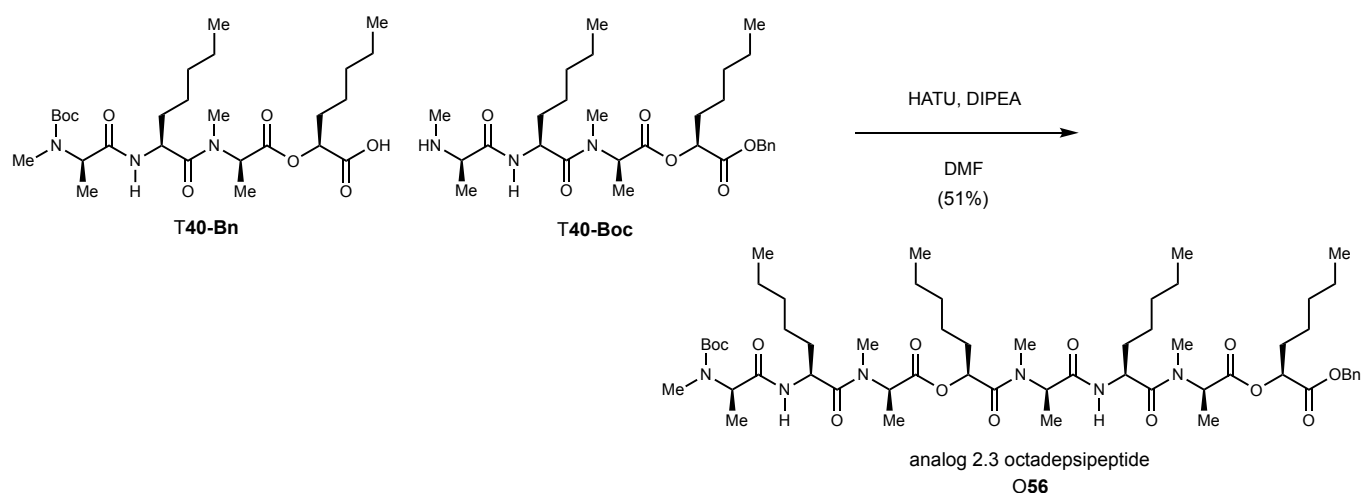

**(4S,7R,10S,13R,16S)-7,8,13,14-tetramethyl-3,6,9,12,15-pentaoxo-4,10-dipentyl-1-phenyl-2,5-dioxa-8,11,14-triazahenicosan-16-yl (6R,9S,12R)-2,2,5,6,11,12-hexamethyl-4,7,10-trioxo-9-pentyl-3-oxa-5,8,11-triazatridecan-13-oate (O56).** A round-bottom flask was charged with the amine (96.2 mg, 180  $\mu\text{mol}$ ), acid (98.0 mg, 180  $\mu\text{mol}$ ), and DCM (1.8 mL). The mixture was cooled to 0 °C and then DIPEA (95  $\mu\text{L}$ , 541  $\mu\text{mol}$ ) and HATU (206 mg, 541  $\mu\text{mol}$ ) were added. The reaction was stirred at 0 °C for 30 min, then warmed to 23 °C for 18 h. The reaction mixture was poured into cold 10% aq citric acid and extracted with DCM. The combined organic layers were washed with satd aq  $\text{NaHCO}_3$ , brine, dried, and concentrated. The crude residue was subjected to flash column chromatography ( $\text{SiO}_2$ , 5-50% ethyl acetate in hexanes) to afford the product as a light yellow oil (97 mg, 51%).  $[\alpha]_D^{24} + 51$  (c 0.70,  $\text{CHCl}_3$ );  $R_f = 0.16$  (30% EtOAc in hexanes); IR (film) 2929, 1747, 1652, 1514, 1473, 1212  $\text{cm}^{-1}$ ;  $^1\text{H}$  NMR (600 MHz,  $\text{CDCl}_3$ )  $\delta$  7.38-7.32 (series of m, 5H), 6.83 (br m, 2H), 5.37 (m, 1H), 5.22-5.15 (m, 2H), 5.13 (m, 3H), 5.02 (m, 1H), 4.91 (m, 1H), 4.86-4.74 (m, 2H), 3.32 (series of m, 12H), 1.86-1.61 (br m, 12H), 1.49 (br s, 9H), 1.38-1.23 (series of m, 32H), 0.90-0.88 (series of m, 12H);  $^{13}\text{C}$  NMR (150 MHz,  $\text{CDCl}_3$ ) This

compound exists in multiple conformations, causing significant peak overlap. Refer to image of the  $^{13}\text{C}$  NMR spectrum; HRMS (EI): Exact mass calcd for  $\text{C}_{56}\text{H}_{98}\text{N}_7\text{O}_{13}$   $[\text{M}+\text{NH}_4]^+$  1076.7223, found 1076.7217. MPT-2-247

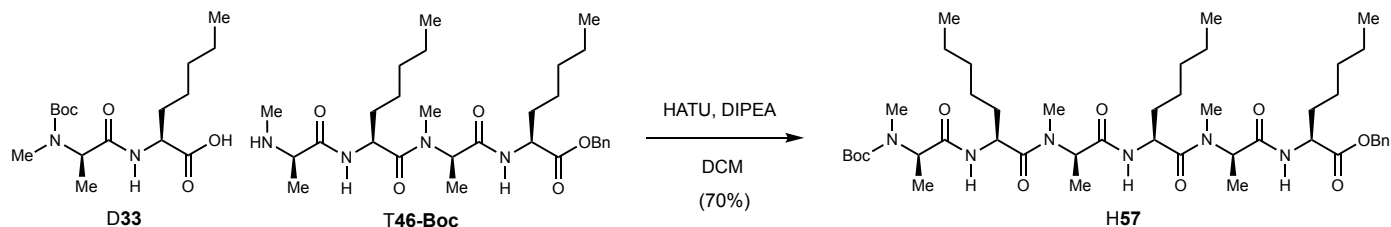

**Benzyl (6R,9S,12R,15S,18R,21S)-2,2,5,6,11,12,17,18-octamethyl-4,7,10,13,16,19-hexa-oxo-9,15,21-tripentyl-3-oxa-5,8,11,14,17,20-hexaazadocosan-22-oate (H57).** A round-bottom flask was charged with the amine (112 mg, 338  $\mu\text{mol}$ ), acid (180 mg, 338  $\mu\text{mol}$ ), and DCM (2.1 mL). The mixture was cooled to 0  $^{\circ}\text{C}$  and then DIPEA (177  $\mu\text{L}$ , 210  $\mu\text{mol}$ ) and HATU (385 mg, 1.01 mmol) were added. The reaction was stirred at 0  $^{\circ}\text{C}$  for 30 min, then warmed to 23  $^{\circ}\text{C}$  for 18 h. The reaction mixture was poured into cold 10% aq citric acid and extracted with DCM. The combined organic layers were washed with satd aq  $\text{NaHCO}_3$ , brine, dried, and concentrated. The crude residue was subjected to flash column chromatography ( $\text{SiO}_2$ , 5-60% ethyl acetate in hexanes) to afford the product as a light yellow oil (200 mg, 70%).  $[\alpha]_D^{24} + 6.3$  (c 0.48,  $\text{CHCl}_3$ );  $R_f = 0.23$  (30% EtOAc/hexanes); IR (film) 3313, 2957, 2931, 2861, 1748, 1660, 1539, 1456, 1368, 1259, 1081  $\text{cm}^{-1}$ ;  $^1\text{H}$  NMR (600 MHz,  $\text{CDCl}_3$ )  $\delta$  7.37-7.34 (series of m, 5H), 7.10 (br s, 1H), 6.91 (br s, 1H), 6.50 (br s, 1H), 5.20-5.14 (series of m, 3H), 5.10-5.17 (series of m, 2H), 4.66 (series of m, 2H), 4.35 (m, 1H), 3.28-2.69 (series of m, 9H), 1.96 (m, 1H), 1.80-1.73 (series of m, 2H), 1.66 (m, 1H), 1.42 (s, 9H), 1.40-1.38 (series of m, 4H), 1.37-1.35 (series of m, 4H), 1.29-1.26 (series of m, 2H), 1.24-1.21 (series of m, 9H), 1.21-1.18 (series of m, 10H), 0.89-0.85 (series of m, 9H);  $^{13}\text{C}$  NMR (150 MHz,  $\text{CDCl}_3$ ) ppm 172.2, 172.1, 172.0, 171.6, 169.7, 169.3, 157.1, 135.4, 128.6, 128.4, 128.2, 80.9, 75.1, 74.6, 73.1, 72.8, 72.1, 67.2, 49.1, 48.9, 48.1, 47.9, 47.8, 31.7, 31.5, 31.3, 31.1, 31.0, 30.9, 30.8, 29.7, 29.6, 28.4, 28.3, 24.7, 24.6, 22.4, 22.3, 17.6, 17.4, 17.1; HRMS (EI): Exact mass calcd for  $\text{C}_{45}\text{H}_{80}\text{N}_7\text{O}_9$   $[\text{M}+\text{NH}_4]^+$  862.6018, found 862.6019. MPT-2-287

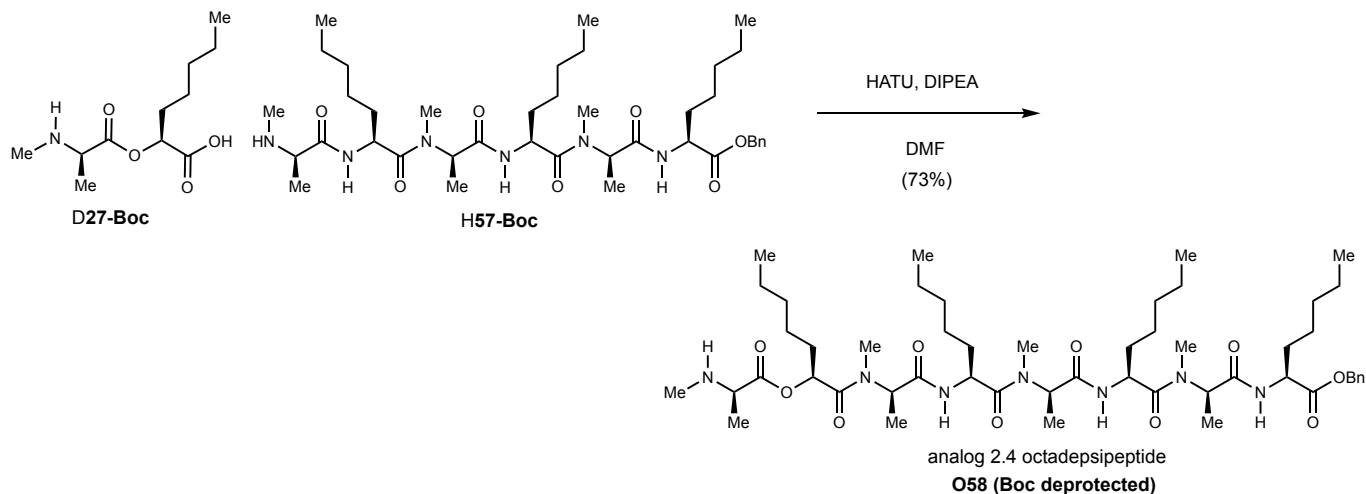

**Benzyl (2*S*,5*R*,8*S*,11*R*,14*S*,17*R*,20*S*)-5,6,11,12,17,18-hexamethyl-20-((methyl-*D*-alanyl)oxy)-4,7,10,13,16,19-hexaoxo-2,8,14-tripentyl-3,6,9,12,15,18-hexaazapentacosanoate (O58, Boc-deprotected).** A round-bottom flask was charged with the amine (162 mg, 217  $\mu\text{mol}$ ), acid (72.0 mg, 217  $\mu\text{mol}$ ), and DMF (2.2 mL). The mixture was cooled to 0  $^{\circ}\text{C}$  and then DIPEA (114  $\mu\text{L}$ , 652  $\mu\text{mol}$ ) and HATU (248 mg, 652  $\mu\text{mol}$ ) were added. The reaction was stirred at 0  $^{\circ}\text{C}$  for 30 min, then warmed to 23  $^{\circ}\text{C}$  for 18 h. The reaction mixture was poured into cold 10% aq citric acid and extracted with EtOAc. The combined organic layers were washed with satd aq  $\text{NaHCO}_3$ , brine, dried, and concentrated. The crude residue was subjected to flash column chromatography ( $\text{SiO}_2$ , 5-60% ethyl acetate in hexanes) to afford the product<sup>6</sup> as a light yellow oil (168 mg, 73%).  $[\alpha]_D^{24} + 22$  (c 0.48,  $\text{CHCl}_3$ );  $R_f = 0.14$  (50% EtOAc/hexanes); IR (film) 3333, 2956, 2930, 2860, 1747, 1667, 1532, 1456, 1381, 1187, 1156, 1082  $\text{cm}^{-1}$ ;  $^1\text{H}$  NMR (600 MHz,  $\text{CDCl}_3$ ) This compound exists as a mixture of rotamers causing significant peak broadening and overlap. Refer to the image of the  $^1\text{H}$  NMR spectrum;  $^{13}\text{C}$  NMR (150 MHz,  $\text{CDCl}_3$ ) This compound is a mixture of rotamers causing significant peak broadening and overlap. Refer to the image of the  $^{13}\text{C}$  NMR spectrum; HRMS (EI): Exact mass calcd for  $\text{C}_{51}\text{H}_{91}\text{N}_8\text{O}_{10}$   $[\text{M}+\text{NH}_4]^+$  975.6858, found 975.6856. MPT-2-273

<sup>6</sup> The product isolated, unexpectedly, was the Boc-deprotected O58. Therefore, it was characterized as such.

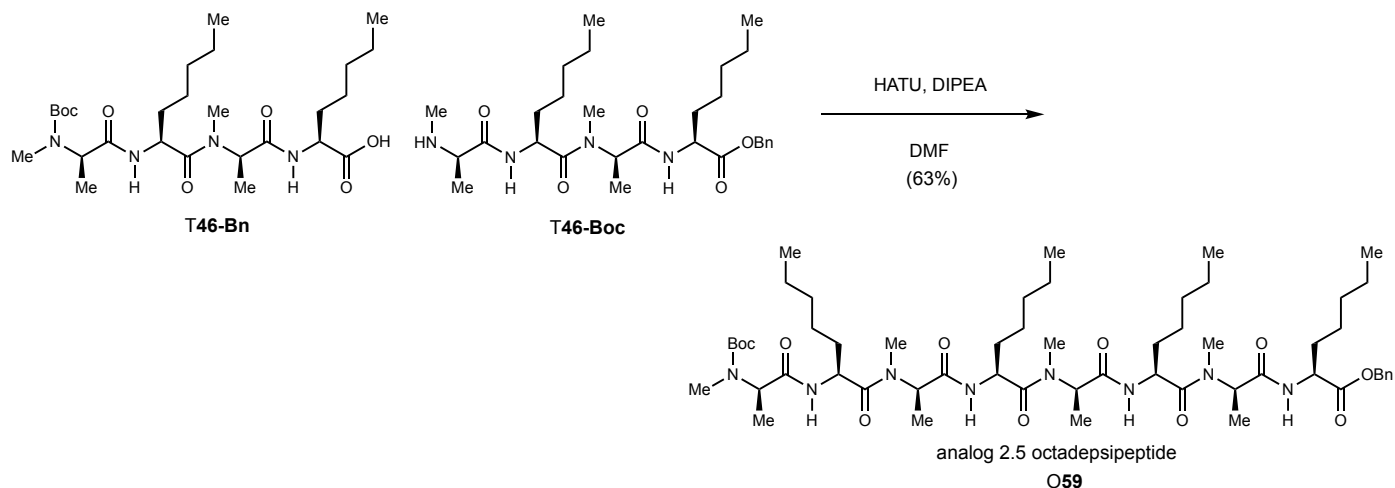

**Benzyl (6R,9S,12R,15S,18R,21S,24R,27S)-2,2,5,6,11,12,17,18,23,24-decamethyl-4,7,10,13,16,19,22,25-octaoxo-9,15,21,27-tetrapentyl-3-oxa-5,8,11,14,17,20,23,26-octaazaocacosan-28-oate (O59).** A round-bottom flask was charged with the amine (93.3 mg, 175  $\mu\text{mol}$ ), acid (95.0 mg, 175  $\mu\text{mol}$ ), and DMF (1.8 mL). The mixture was cooled to 0  $^{\circ}\text{C}$  and then DIPEA (91.5  $\mu\text{L}$ , 525  $\mu\text{mol}$ ) and HATU (200 mg, 525  $\mu\text{mol}$ ) were added. The reaction was stirred at 0  $^{\circ}\text{C}$  for 30 min, then warmed to 23  $^{\circ}\text{C}$  for 18 h. The reaction mixture was poured into cold 10% aq citric acid and extracted with EtOAc. The combined organic layers were washed with satd aq  $\text{NaHCO}_3$ , brine, dried, and concentrated. The crude residue was subjected to flash column chromatography ( $\text{SiO}_2$ , 5-40% ethyl acetate in hexanes) to afford the product as a light yellow oil (117 mg, 63%).  $[\alpha]_D^{24} + 37$  (c 0.45,  $\text{CHCl}_3$ );  $R_f = 0.47$  (30% EtOAc/hexanes); IR (film) 3405, 2956, 2929, 2859, 1741, 1652, 1540, 1457, 1391, 1260, 1155, 1092  $\text{cm}^{-1}$ ;  $^1\text{H}$  NMR (600 MHz,  $\text{CDCl}_3$ ) This compound exists as a mixture of rotamers causing significant peak broadening and overlap. Refer to the image of the  $^1\text{H}$  NMR spectrum;  $^{13}\text{C}$  NMR (150 MHz,  $\text{CDCl}_3$ ) This compound is a mixture of rotamers causing significant peak broadening and overlap. Refer to the image of the  $^{13}\text{C}$  NMR spectrum; HRMS (EI): Exact mass calcd for  $\text{C}_{56}\text{H}_{100}\text{N}_9\text{O}_{11}$   $[\text{M}+\text{NH}_4]^+$  1074.7542, found 1074.7544. MPT-2-276

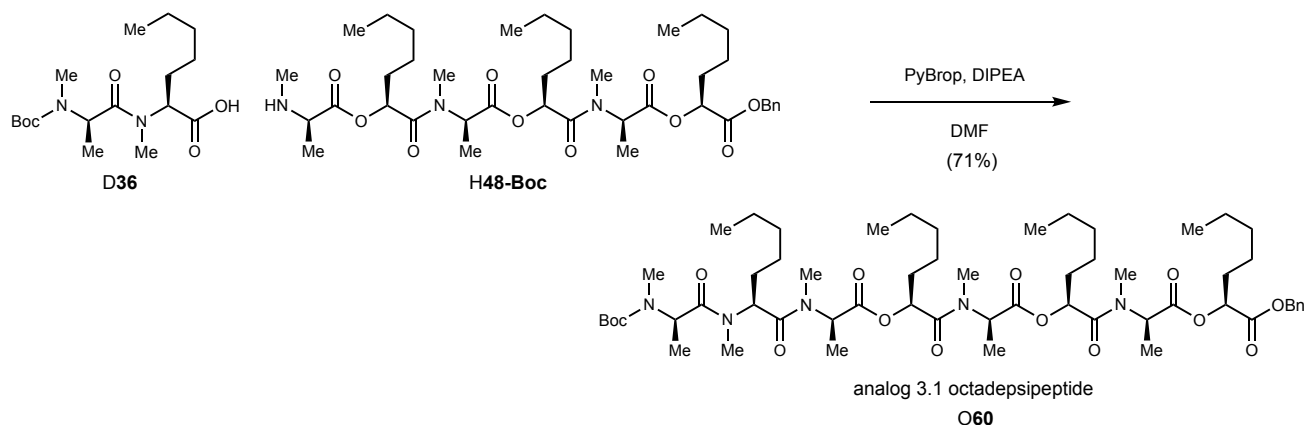

**Benzyl (4S,7R,10S,13R,16S)-7,8,13,14-tetramethyl-3,6,9,12,15-pentaoxo-4,10-dipentyl-1-phenyl-2,5,11-trioxa-8,14-diazahenicosan-16-yl (6R,9S,12R)-2,2,5,6,8,11,12-heptamethyl-4,7,10-trioxa-9-pentyl-3-oxa-5,8,11-triazatridecan-13-**

**oate (O60).** A round-bottom flask was charged with the amine (86.0 mg, 250  $\mu\text{mol}$ ), acid (186 mg, 250  $\mu\text{mol}$ ), and DMF (2.5 mL). The mixture was cooled to 0 °C and then DIPEA (130  $\mu\text{L}$ , 750  $\mu\text{mol}$ ) and PyBrop (183 mg, 375  $\mu\text{mol}$ ) were added. The reaction was stirred at 0 °C for 30 min, then warmed to 23 °C for 18 h. The reaction mixture was poured into cold 10% aq citric acid and extracted with EtOAc. The combined organic layers were washed with satd aq NaHCO<sub>3</sub>, brine, dried, and concentrated. The crude residue was subjected to flash column chromatography (SiO<sub>2</sub>, 5-50% ethyl acetate in hexanes) to afford the product as a light yellow oil (189 mg, 71%).  $[\alpha]_D^{24} + 22$  (c 0.46, CHCl<sub>3</sub>);  $R_f = 0.27$  (25% EtOAc/hexanes); IR (film) 2956, 2931, 2860, 1745, 1698, 1455, 1390, 1258, 1150, 1092 cm<sup>-1</sup>; <sup>1</sup>H NMR (600 MHz, CDCl<sub>3</sub>) This compound exists as a mixture of rotamers causing significant peak broadening and overlap. Refer to the image of the <sup>1</sup>H NMR spectrum; <sup>13</sup>C NMR (150 MHz, CDCl<sub>3</sub>) This compound exists in multiple conformations, causing significant peak overlap. Refer to image of the <sup>13</sup>C NMR spectrum; HRMS (EI): Exact mass calcd for C<sub>57</sub>H<sub>99</sub>N<sub>6</sub>O<sub>14</sub> [M+NH<sub>4</sub>]<sup>+</sup> 1091.7214, found 1091.7212. MPT-3-072

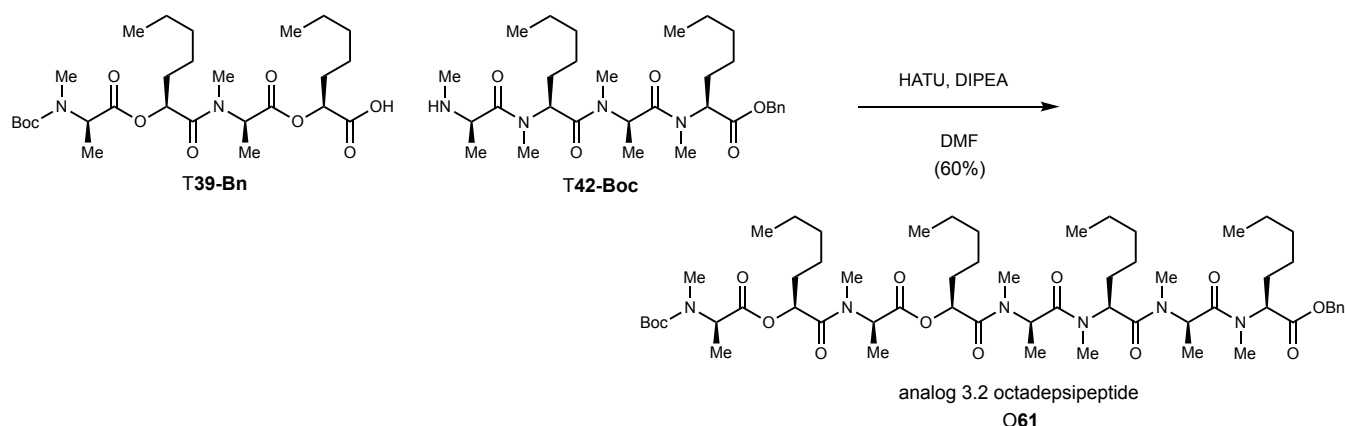

**Benzyl (2S,5R,8S,11R,14S)-14-(((6R,9S,12R)-2,2,5,6,11,12-hexamethyl-4,7,10-trioxo-9-pentyl-3,8-dioxa-5,11-diazatridecan-13-oyl)oxy)-3,5,6,9,11,12-hexamethyl-4,7,10,13-tetraoxo-2,8-dipentyl-3,6,9,12-tetraazanonadecanoate (O61).** A round-bottom flask was charged with the amine (125 mg, 230  $\mu\text{mol}$ ), acid (125 mg, 230  $\mu\text{mol}$ ), and DMF (2.3 mL). The mixture was cooled to 0 °C and then DIPEA (120  $\mu\text{L}$ , 690  $\mu\text{mol}$ ) and HATU (262 mg, 690  $\mu\text{mol}$ ) were added. The reaction was stirred at 0 °C for 30 min, then warmed to 23 °C for 18 h. The reaction mixture was poured into cold 10% aq citric acid and extracted with EtOAc. The combined organic layers were washed with satd aq NaHCO<sub>3</sub>, brine, dried, and concentrated. The crude residue was subjected to flash column chromatography (SiO<sub>2</sub>, 5-50% ethyl acetate in hexanes) to afford the product as a yellow oil (149 mg, 60%).  $[\alpha]_D^{24} - 22$  (c 0.25, CHCl<sub>3</sub>);  $R_f = 0.37$  (30% EtOAc/hexanes); IR (film) 2955, 2933, 2858, 1745, 1699, 1450, 1258, 1156, 1092 cm<sup>-1</sup>; <sup>1</sup>H NMR (600 MHz, CDCl<sub>3</sub>)  $\delta$  7.37-7.31 (series of m, 5H), 5.24-5.20 (series of m, 5H), 5.15 (m, 2H), 5.04 (m, 1H), 4.97 (m, 1H), 4.70 (m, 1H), 3.11-2.81 (series of m, 18H), 1.88-1.80 (series of m, 6H), 1.76-1.68 (series of m, 4H), 1.57-1.52 (m, 3H), 1.45 (s, 9H), 1.41-1.38 (series of m, 6H), 1.38-1.35 (series of m, 6H), 1.34-1.27 (series of m, 19H), 0.90-0.88 (series of m, 12H); <sup>13</sup>C NMR (150 MHz, CDCl<sub>3</sub>) ppm 171.3, 171.1, 170.7, 170.5, 170.1, 169.9, 169.5, 169.4, 156.0, 135.3, 128.6, 128.5, 128.3, 79.7, 73.4, 73.0, 72.1, 71.8, 71.7, 71.6, 71.4, 67.2, 67.0, 55.0, 54.9, 54.5, 53.1, 52.4, 32.1, 31.6, 31.5, 31.4, 31.3, 31.2, 31.1, 30.9, 30.7, 30.2, 29.6, 28.4, 25.1, 24.9, 24.8, 24.5, 22.5, 22.4, 22.3, 15.6, 15.5, 14.4, 14.3, 14.0, 13.98, 13.94; HRMS (EI): Exact mass calcd for C<sub>58</sub>H<sub>102</sub>N<sub>7</sub>O<sub>13</sub> [M+NH<sub>4</sub>]<sup>+</sup> 1104.7536, found 1104.7536. MPT-3-109

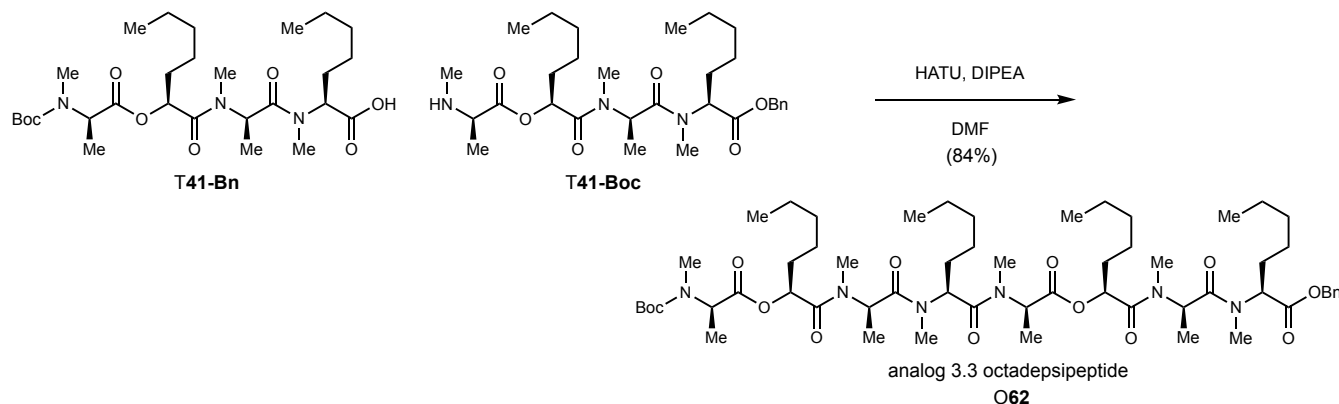

**Benzyl (S)-2-((6R,9S,12R,15S,18R,21S,24R)-N,2,2,5,6,11,12,14,17,18,23,24-dodecamethyl-4,7,10,13,16,19,22-heptaaxo-9,15,21-tripentyl-3,8,20-trioxa-5,11,14,17,23-pentaazapentacosan-25-amido)heptanoate (O62).** A round-bottom flask was charged with the amine (102 mg, 186  $\mu\text{mol}$ ), acid (104 mg, 186  $\mu\text{mol}$ ), and DMF (1.9 mL). The mixture was cooled to 0 °C and then DIPEA (100  $\mu\text{L}$ , 559  $\mu\text{mol}$ ) and HATU (213 mg, 559  $\mu\text{mol}$ ) were added. The reaction was stirred at 0 °C for 30 min, then warmed to 23 °C for 18 h. The reaction mixture was poured into cold 10% aq citric acid and extracted with EtOAc. The combined organic layers were washed with satd aq  $\text{NaHCO}_3$ , brine, dried, and concentrated. The crude residue was subjected to flash column chromatography ( $\text{SiO}_2$ , 5-40% ethyl acetate in hexanes) to afford the product as a light yellow oil (170 mg, 84%).  $[\alpha]_D^{24} - 13$  (c 0.13,  $\text{CHCl}_3$ );  $R_f = 0.17$  (25% EtOAc/hexanes); IR (film) 2927, 2858 2665, 1847, 1743, 1456, 1392, 1321, 1258, 1152, 1092  $\text{cm}^{-1}$ ;  $^1\text{H}$  NMR (600 MHz,  $\text{CDCl}_3$ ) This compound exists in multiple conformations, causing significant peak overlap. Refer to image of the  $^1\text{H}$  NMR spectrum;  $^{13}\text{C}$  NMR (150 MHz,  $\text{CDCl}_3$ ) ppm 171.8, 171.6, 171.3, 170.7, 170.6, 167.9, 166.2, 165.6, 151.7, 135.6, 128.4, 128.2, 128.1, 80.9, 79.2, 77.5, 74.9, 71.3, 67.3, 67.2, 66.9, 66.7, 66.6, 60.7, 60.4, 60.1, 56.7, 56.5, 55.9, 54.7, 51.5, 34.7, 33.6, 32.5, 32.1, 31.8, 31.6, 31.4, 31.1, 30.4, 29.7, 29.1, 28.4, 28.2, 27.9, 25.9, 25.7, 25.2, 24.9, 24.7, 24.1, 22.4, 21.9, 21.7, 16.6, 14.6, 14.1, 13.9; HRMS (EI): Exact mass calcd for  $\text{C}_{58}\text{H}_{102}\text{N}_7\text{O}_{13}$   $[\text{M}+\text{NH}_4]^+$  1104.7536, found 1104.7532. MPT-3-020

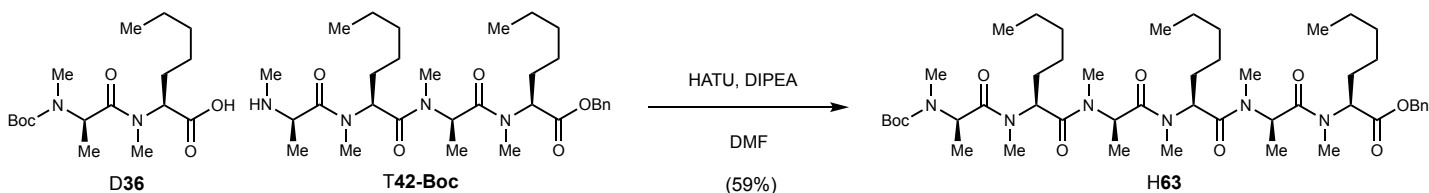

**Benzyl (6R,9S,12R,15S,18R,21S)-2,2,5,6,8,11,12,14,17,18,20-undecamethyl-4,7,10,13,16,19-hexaaxo-9,15,21-tripentyl-3-oxa-5,8,11,14,17,20-hexaazadocosan-22-oate (H63).** A round-bottom flask was charged with the amine (180 mg, 343  $\mu\text{mol}$ ), acid (118 mg, 343  $\mu\text{mol}$ ), and DMF (3.4 mL). The mixture was cooled to 0 °C and then DIPEA (179  $\mu\text{L}$ , 1.03 mmol) and HATU (392 mg, 1.03  $\mu\text{mol}$ ) were added. The reaction was stirred at 0 °C for 30 min, then warmed to 23 °C for 18 h.. The reaction mixture was poured into cold 10% aq citric acid and extracted with EtOAc. The combined organic layers were washed with satd aq  $\text{NaHCO}_3$ , brine, dried, and concentrated. The crude residue was subjected to flash column chromatography ( $\text{SiO}_2$ , 5-50% ethyl acetate in hexanes) to afford the product as a yellow oil (179 mg, 59%).  $[\alpha]_D^{24} + 14$  (c 0.33,  $\text{CHCl}_3$ );  $R_f = 0.18$  (30% EtOAc/hexanes); IR (film) 2954, 2931, 2860, 1744, 1699, 1649, 1455, 1390, 1322, 1259, 1156  $\text{cm}^{-1}$ ;  $^1\text{H}$  NMR (600 MHz,  $\text{CDCl}_3$ )  $\delta$  7.39-7.30 (series of m, 5H), 5.26-5.20 (series of m, 4H), 5.12 (m, 1H), 5.05 (m, 1H), 4.98

(m, 1H), 4.69 (m, 1H), 3.15-2.81 (series of m, 18H), 1.86 (m, 2H), 1.73 (m, 2H), 1.59 (m, 2H), 1.47 (s, 9H), 1.40-1.35 (series of m, 8H), 1.34-1.25 (series of m, 19H), 0.90-0.88 (series of m, 9H);  $^{13}\text{C}$  NMR (150 MHz,  $\text{CDCl}_3$ ) ppm 171.1, 170.6, 170.1, 169.9, 169.5, 169.4, 156.0, 135.3, 128.6, 128.5, 128.3, 79.7, 73.4, 73.0, 72.1, 71.6, 67.2, 67.0, 54.9, 54.4, 53.0, 52.4, 32.0, 31.6, 31.4, 31.3, 31.2, 31.1, 30.9, 30.7, 30.2, 29.7, 29.6, 28.4, 25.1, 24.8, 24.5, 22.4, 15.6, 15.3, 14.6, 14.3, 14.0, 13.9; HRMS (EI): Exact mass calcd for  $\text{C}_{48}\text{H}_{86}\text{N}_7\text{O}_9$   $[\text{M}+\text{NH}_4]^+$  904.6487, found 904.6484. MPT-4-204

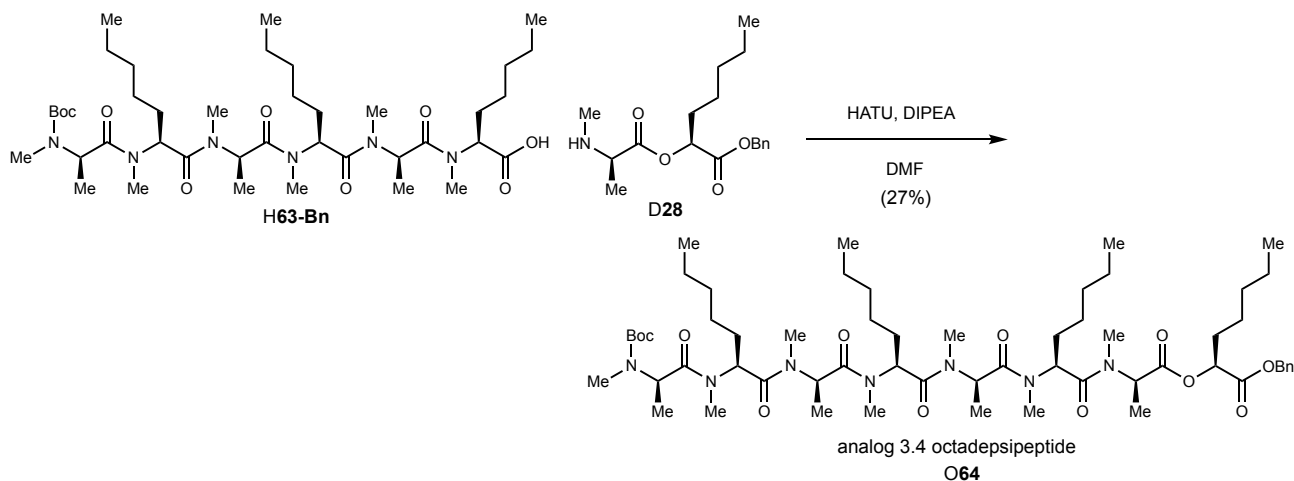

**(S)-1-(benzyloxy)-1-oxoheptan-2-yl (6R,9S,12R,15S,18R,21S,24R)-2,2,5,6,8,11,12,14,17,18,20,23,24-tridecamethyl-4,7,10,13,16,19,22-hepta-oxo-9,15,21-tripentyl-3-oxa-5,8,11,14,17,20,23-heptaazapentacosan-25-oate (O64).** A round-bottom flask was charged with the amine (32.0 mg, 100  $\mu\text{mol}$ ), acid (80.0 mg, 100  $\mu\text{mol}$ ), and DMF (1.0 mL). The mixture was cooled to 0  $^{\circ}\text{C}$  and then DIPEA (60.0  $\mu\text{L}$ , 300  $\mu\text{mol}$ ) and HATU (114 mg, 300  $\mu\text{mol}$ ) were added. The reaction was stirred at 0  $^{\circ}\text{C}$  for 30 min, then warmed to 23  $^{\circ}\text{C}$  for 18 h. The reaction mixture was poured into cold 10% aq citric acid and extracted with EtOAc. The combined organic layers were washed with satd aq  $\text{NaHCO}_3$ , brine, dried, and concentrated. The crude residue was subjected to flash column chromatography ( $\text{SiO}_2$ , 5-40% ethyl acetate in hexanes) to afford the product as a light yellow oil (30 mg, 27%).  $[\alpha]_D^{24} + 2.3$  (c 0.53,  $\text{CHCl}_3$ );  $R_f = 0.13$  (30% EtOAc/hexanes); IR (film) 2956, 2928, 2858, 1742, 1651, 1456, 1393, 1218, 1155, 1083  $\text{cm}^{-1}$ ;  $^1\text{H}$  NMR (600 MHz,  $\text{CDCl}_3$ ) This compound exists in multiple conformations, causing significant peak overlap. Refer to image of the  $^1\text{H}$  NMR spectrum;  $^{13}\text{C}$  NMR (150 MHz,  $\text{CDCl}_3$ ) ppm 172.6, 171.8, 171.1, 170.6, 170.0, 169.8, 169.5, 169.3, 156.0, 135.2, 128.6, 128.4, 128.3, 80.0, 79.8, 73.4, 73.0, 72.9, 71.5, 71.3, 71.2, 71.0, 70.9, 67.2, 67.1, 67.0, 54.9, 54.4, 54.3, 53.4, 53.3, 53.1, 52.8, 52.6, 52.5, 51.4, 31.6, 31.5, 31.4, 31.2, 30.9, 30.2, 29.7, 29.5, 28.9, 28.7, 28.3, 25.3, 25.0, 24.7, 22.6, 15.5, 14.7, 14.3, 14.0; HRMS (EI): Exact mass calcd for  $\text{C}_{59}\text{H}_{105}\text{N}_8\text{O}_{12}$   $[\text{M}+\text{NH}_4]^+$  1117.7852, found 1117.7848. MPT-5-168

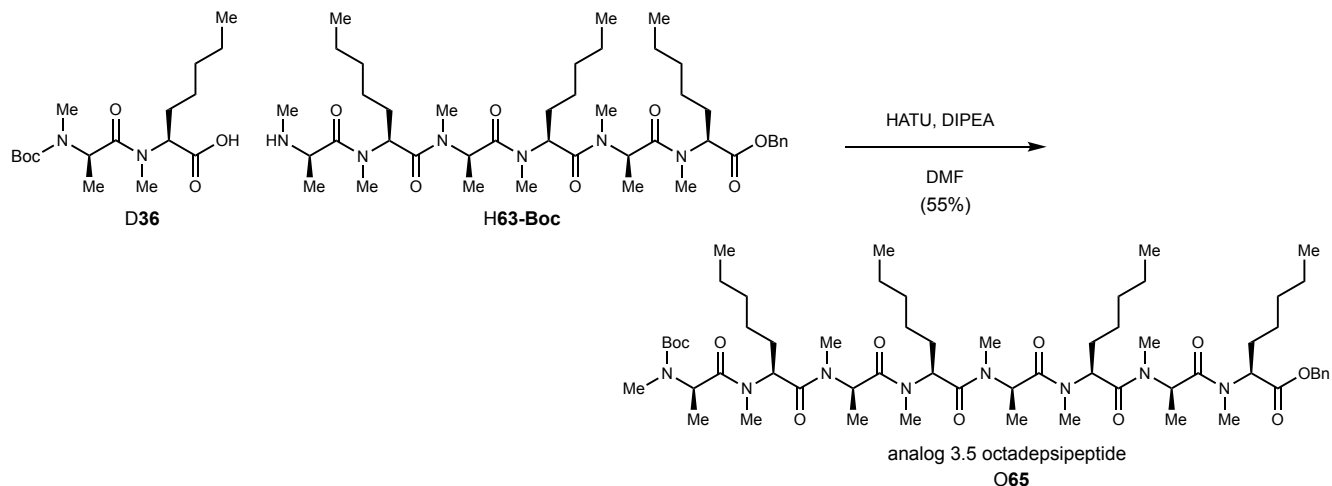

**Benzyl (6R,9S,12R,15S,18R,21S,24R,27S)-2,2,5,6,8,11,12,14,17,18,20,23,24,26-tetradecamethyl-4,7,10,13,16,19,22,25-octaoxo-9,15,21,27-tetrapentyl-3-oxa-5,8,11,14,17,20,23,26-octaazaogtacosan-28-oate (O65).** A round-bottom flask was charged with the amine (95.2 mg, 121  $\mu\text{mol}$ ), acid (41.7 mg, 121  $\mu\text{mol}$ ), and DMF (1.2 mL). The mixture was cooled to 0 °C and then DIPEA (63.3  $\mu\text{L}$ , 363  $\mu\text{mol}$ ) and HATU (238 mg, 363  $\mu\text{mol}$ ) were added. The reaction was stirred at 0 °C for 1 h. The reaction mixture was poured into cold 10% aq citric acid and extracted with EtOAc. The combined organic layers were washed with satd aq  $\text{NaHCO}_3$ , brine, dried, and concentrated. The crude residue was subjected to flash column chromatography ( $\text{SiO}_2$ , 5-60% ethyl acetate in hexanes) to afford the product as a yellow oil (74.1 mg, 55%).  $[\alpha]_D^{24} + 9.0$  (*c* 0.33,  $\text{CHCl}_3$ );  $R_f = 0.23$  (40% EtOAc/hexanes); IR (film) 2955, 2930, 2860, 1743, 1695, 1667, 1456, 1389, 1315, 1185  $\text{cm}^{-1}$ ;  $^1\text{H}$  NMR (600 MHz,  $\text{CDCl}_3$ )  $\delta$  7.37-7.31 (series of m, 5H), 5.23-5.17 (m, 4H), 5.12 (d,  $J = 4.8$  Hz, 1H), 5.09 (d,  $J = 4.8$  Hz, 1H), 5.06 (series of m, 2H), 4.98 (m, 1H), 4.69 (m, 1H), 3.20-2.81 (series of m, 24H), 1.87-1.80 (series of m, 6H), 1.74-1.69 (m, 2H), 1.54 (m, 3H), 1.47 (s, 9H), 1.42-1.39 (series of m, 4H), 1.38-1.35 (series of m, 10H), 1.31-1.24 (series of m, 19H), 0.90-0.84 (series of m, 12H);  $^{13}\text{C}$  NMR (150 MHz,  $\text{CDCl}_3$ ) ppm 172.5, 171.7, 171.1, 170.5, 170.1, 169.9, 169.5, 169.3, 156.0, 135.3, 128.6, 128.5, 128.4, 80.0, 79.7, 73.4, 73.0, 72.0, 71.6, 71.3, 71.1, 67.2, 67.0, 55.0, 54.9, 54.4, 53.1, 52.5, 31.6, 31.4, 31.3, 31.2, 31.1, 31.0, 30.9, 30.6, 30.4, 30.2, 29.7, 29.6, 29.5, 28.4, 25.1, 24.8, 24.7, 24.5, 24.4, 22.5, 22.4, 22.3, 15.4, 15.3, 14.6, 14.3, 14.0, 13.9; HRMS (EI): Exact mass calcd for  $\text{C}_{60}\text{H}_{108}\text{N}_9\text{O}_{11}$   $[\text{M}+\text{NH}_4]^+$  1130.8168, found 1130.8166. MPT-5-184



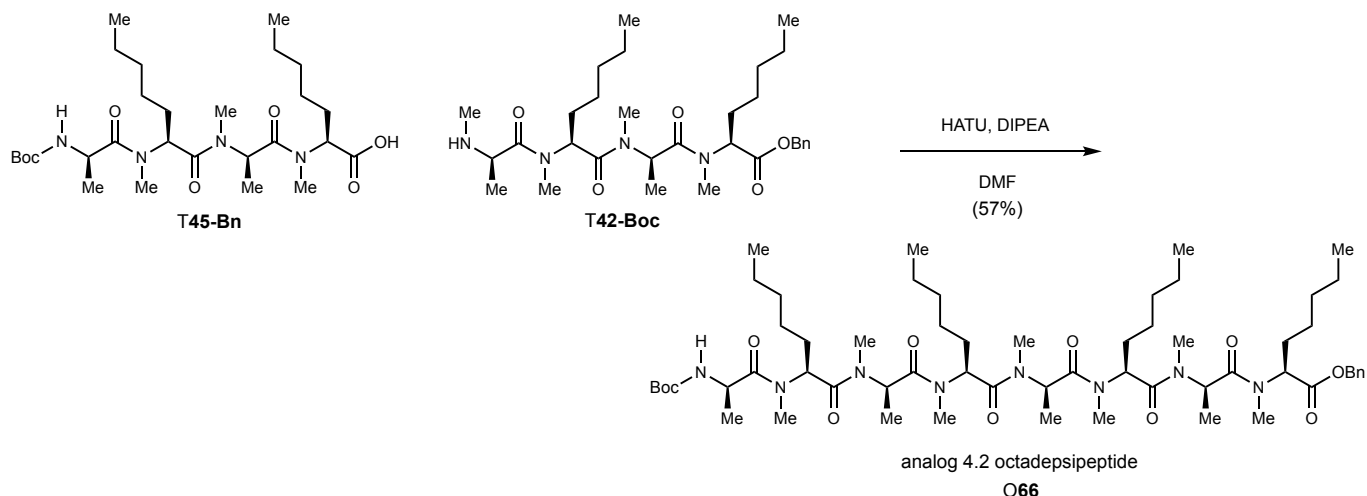

**Benzyl (6R,9S,12R,15S,18R,21S,24R,27S)-2,2,6,8,11,12,14,17,18,20,23,24,26-tridecamethyl-4,7,10,13,16,19,22,25-octaoxo-9,15,21,27-tetrapentyl-3-oxa-5,8,11,14,17,20,23,26-octaazaocacosan-28-oate (O66).** A round-bottom flask was charged with the amine (124 mg, 193  $\mu\text{mol}$ ), acid (124 mg, 193  $\mu\text{mol}$ ), and DMF (1.9 mL). The mixture was cooled to 0  $^{\circ}\text{C}$  and then DIPEA (83.0  $\mu\text{L}$ , 579  $\mu\text{mol}$ ) and HATU (177 mg, 559  $\mu\text{mol}$ ) were added. The reaction was stirred at 0  $^{\circ}\text{C}$  for 30 min, then warmed to 23  $^{\circ}\text{C}$  for 18 h. The reaction mixture was poured into cold 10% aq citric acid and extracted with EtOAc. The combined organic layers were washed with satd aq  $\text{NaHCO}_3$ , brine, dried, and concentrated. The crude residue was subjected to flash column chromatography ( $\text{SiO}_2$ , 5-50% ethyl acetate in hexanes) to afford the product as a yellow oil (121 mg, 57%).  $[\alpha]_D^{24} - 19$  (c 0.31,  $\text{CHCl}_3$ );  $R_f = 0.19$  (30% EtOAc/hexanes); IR (film) 3650, 2958, 2932, 2861, 1731, 1660, 1466, 1408, 1381, 1141  $\text{cm}^{-1}$ ;  $^1\text{H}$  NMR (600 MHz,  $\text{CDCl}_3$ )  $\delta$  7.31-7.25 (series of m, 6H), 5.17-5.13 (m, 5H), 5.06 (d,  $J = 4.6$  Hz, 1H), 5.05 (d,  $J = 4.6$  Hz, 1H), 4.97 (m, 1H), 4.92 (m, 1H), 4.64 (m, 1H), 3.12-2.64 (series of m, 21H), 1.81-1.74 (series of m, 6H), 1.70-1.62 (m, 4H), 1.48 (m, 3H), 1.41 (s, 9H), 1.36-1.33 (series of m, 4H), 1.32-1.29 (series of m, 8H), 1.26-1.16 (series of m, 19H), 0.85-0.73 (series of m, 12H);  $^{13}\text{C}$  NMR (150 MHz,  $\text{CDCl}_3$ ) 171.7, 171.4, 171.1, 170.8, 170.3, 170.1, 169.9, 169.5, 156.0, 135.3, 128.7, 128.4, 128.3, 79.7, 73.4, 73.0, 72.1, 72.0, 71.7, 71.6, 71.4, 67.6, 67.2, 67.0, 55.0, 54.9, 53.3, 52.4, 46.1, (29) 31.6, 31.5, 31.4, 31.3, 31.2, 31.1, 30.8, 30.7, 30.6, 30.7, 30.2, 29.6, 28.9, 28.3, 25.3, 25.1, 24.8, 24.5, 22.6, 22.5, 22.4, 22.3, 15.4, 14.7, 14.3, 14.0; HRMS (EI): Exact mass calcd for  $\text{C}_{59}\text{H}_{106}\text{N}_9\text{O}_{11}$   $[\text{M}+\text{NH}_4]^+$  1116.8012, found 1116.8007 MPT-4-178

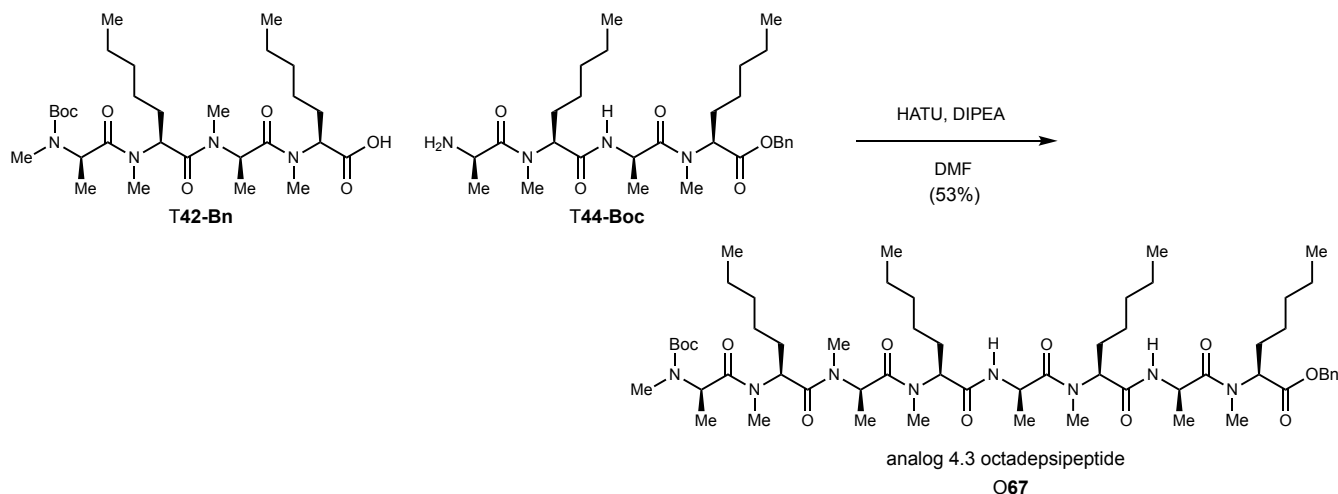

**Benzyl (6R,9S,12R,15S,18R,21S,24R,27S)-2,2,5,6,8,11,12,14,18,20,24,26-dodecamethyl-4,7,10,13,16,19,22,25-octa-oxo-9,15,21,27-tetrapentyl-3-oxa-5,8,11,14,17,20,23,26-octaazaocacosan-28-oate (O67).** A round-bottom flask was charged with the amine (63.6 mg, 111  $\mu\text{mol}$ ), acid (59.3 mg, 111  $\mu\text{mol}$ ), and DMF (1.1 mL). The mixture was cooled to 0  $^{\circ}\text{C}$  and then DIPEA (49.4  $\mu\text{L}$ , 333  $\mu\text{mol}$ ) and HATU (105 mg, 333  $\mu\text{mol}$ ) were added. The reaction was stirred at 0  $^{\circ}\text{C}$  for 30 min, then warmed to 23  $^{\circ}\text{C}$  for 18 h. The reaction mixture was poured into cold 10% aq citric acid and extracted with EtOAc. The combined organic layers were washed with satd aq  $\text{NaHCO}_3$ , brine, dried, and concentrated. The crude residue was subjected to flash column chromatography ( $\text{SiO}_2$ , 5-50% ethyl acetate in hexanes) to afford the product as a yellow oil (64.1 mg, 53%).  $[\alpha]_D^{24} - 11$  (c 0.27,  $\text{CHCl}_3$ );  $R_f = 0.22$  (30% EtOAc/hexanes); IR (film) 3322, 2921, 2862, 1748, 1669, 1539, 1456, 1392, 1158, 1092  $\text{cm}^{-1}$ ;  $^1\text{H}$  NMR (600 MHz,  $\text{CDCl}_3$ )  $\delta$  7.40-7.32 (series of m, 7H), 5.31 (m, 1H), 5.22-5.12 (series of m, 5H), 5.06 (m, 1H), 4.99 (m, 1H), 4.70 (m, 2H), 3.36-2.80 (series of m, 18H), 1.82 (m, 2H), 1.73 (m, 2H), 1.63 (m, 2H), 1.56-1.51 (series of m, 6H), 1.46 (m, 9H), 1.41-1.37 (series of m, 6H), 1.32-1.29 (series of m, 6H), 1.27-1.20 (series of m, 20H), 0.90-0.83 (series of m, 12H);  $^{13}\text{C}$  NMR (150 MHz,  $\text{CDCl}_3$ ) ppm 171.8, 171.1, 170.5, 170, 169.9, 169.8, 169.5, 169.3, 156.0, 135.3, 128.6, 128.4, 128.3, 79.8, 73.4, 73.0, 71.4, 67.2, 67.0, 54.1, 52.7, 52.5, 31.7, 31.6, 31.55, 31.5, 31.4, 31.37, 31.3, 31.2, 31.1, 31.0, 30.9, 30.8, 30.4, 30.3, 30.2, 30.1, 29.7, 29.6, 29.4, 28.3, 25.0, 24.8, 24.7, 24.4, 22.42, 22.4, 22.32, 22.3, 15.3, 14.6, 14.2, 14.0; HRMS (EI): Exact mass calcd for  $\text{C}_{58}\text{H}_{104}\text{N}_9\text{O}_{11}$   $[\text{M}+\text{NH}_4]^+$  1102.7855, found 1102.7850. MPT-4-246

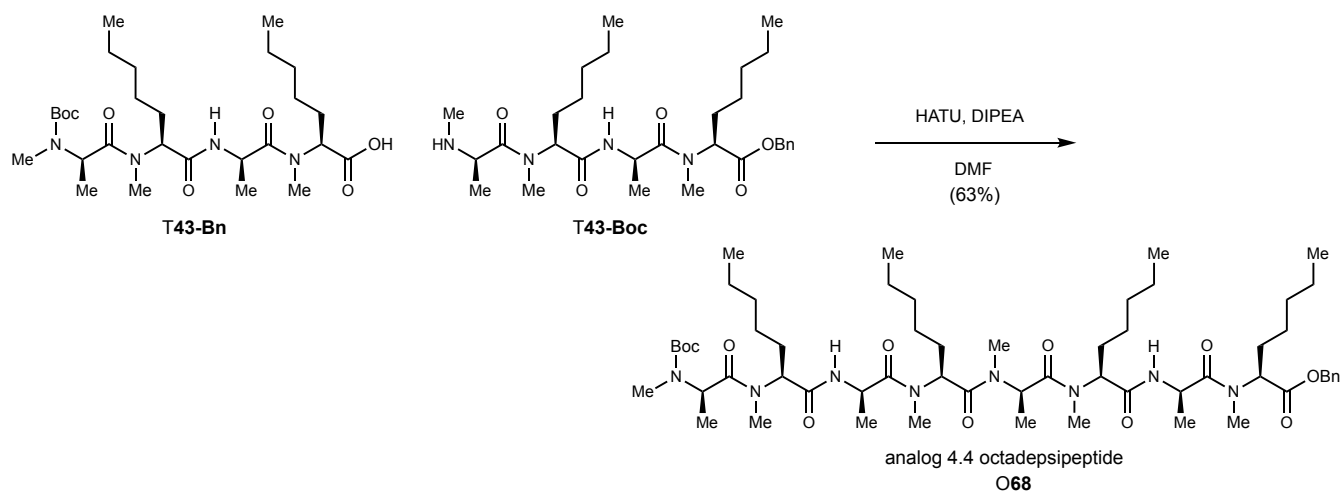

**Benzyl (6R,9S,12R,15S,18R,21S,24R,27S)-2,2,5,6,8,12,14,17,18,20,24,26-dodecamethyl-4,7,10,13,16,19,22,25-octaoxa-9,15,21,27-tetrapentyl-3-oxa-5,8,11,14,17,20,23,26-octaazaococosan-28-oate (O68).** A round-bottom flask was charged with the amine (83.0 mg, 149  $\mu$ mol), acid (81.3 mg, 149  $\mu$ mol), and DMF (1.5 mL). The mixture was cooled to 0 °C and then DIPEA (80.0  $\mu$ L, 448  $\mu$ mol) and HATU (171 mg, 559  $\mu$ mol) were added. The reaction was stirred at 0 °C for 30 min, then warmed to 23 °C for 18 h. The reaction mixture was poured into cold 10% aq citric acid and extracted with EtOAc. The combined organic layers were washed with satd aq NaHCO<sub>3</sub>, brine, dried, and concentrated. The crude residue was subjected to flash column chromatography (SiO<sub>2</sub>, 5-40% ethyl acetate in hexanes) to afford the product as a light yellow oil (102 mg, 63%).  $[\alpha]_D^{24}$  - 18 (c 0.16, CHCl<sub>3</sub>);  $R_f$  = 0.10 (25% EtOAc/hexanes); IR (film) 3418, 2958, 2925, 2854, 1740, 1644, 1557, 1540, 1375, 1260, 1080 cm<sup>-1</sup>; <sup>1</sup>H NMR (600 MHz, CDCl<sub>3</sub>)  $\delta$  7.40-7.29 (series of m, 6H), 7.09 (m, 1H), 5.29 (m, 1H), 5.22-5.08 (series of m, 4H), 5.03 (m, 1H), 4.96 (m, 1H), 4.90-4.72 (series of m, 3H), 3.03-2.71 (series of m, 18H), 2.02-1.88 (series of m, 3H), 1.65 (br s, 9H), 1.48-1.44 (series of m, 10H), 1.35-1.23 (series of m, 28H), 0.90-0.83 (series of m, 12H); <sup>13</sup>C NMR (150 MHz, CDCl<sub>3</sub>) This compound exists in multiple conformations, causing significant peak overlap. Refer to image of the <sup>13</sup>C NMR spectrum; HRMS (EI): Exact mass calcd for C<sub>58</sub>H<sub>104</sub>N<sub>9</sub>O<sub>11</sub> [M+NH<sub>4</sub>]<sup>+</sup> 1102.7855, found 1102.7850. MPT-3-087

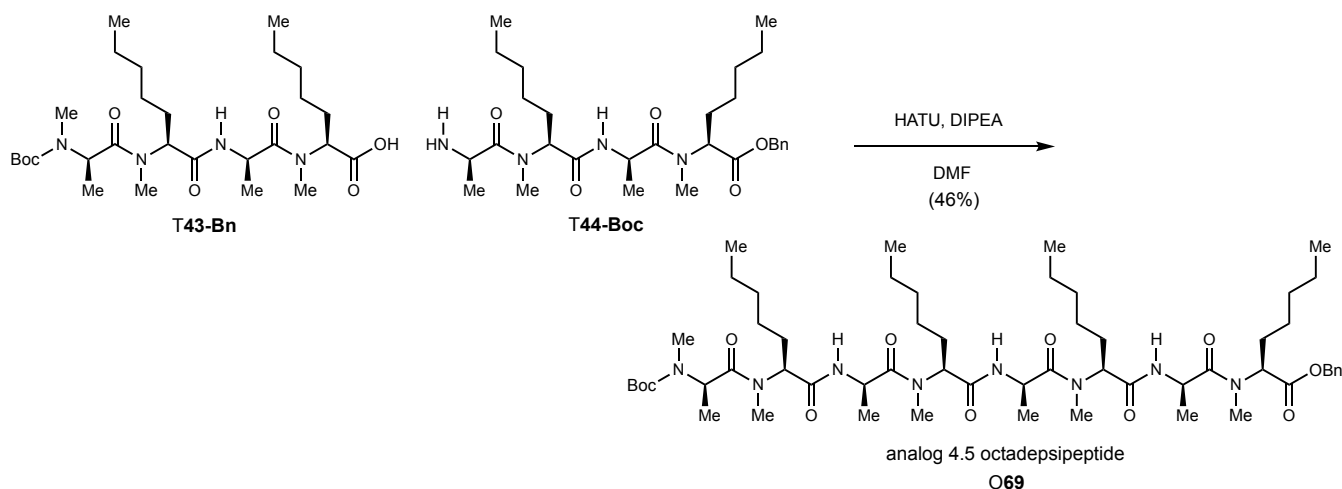

**Benzyl (6R,9S,12R,15S,18R,21S,24R,27S)-2,2,5,6,8,12,14,18,20,24,26-undecamethyl-4,7,10,13,16,19,22,25-octaoxo-9,15,21,27-tetrapentyl-3-oxa-5,8,11,14,17,20,23,26-octaazaocacosan-28-oate (O69).** A round-bottom flask was charged with the amine (85.8 mg, 154  $\mu\text{mol}$ ), acid (82.0 mg, 154  $\mu\text{mol}$ ), and DMF (1.5 mL). The mixture was cooled to 0 °C and then DIPEA (48.7  $\mu\text{L}$ , 462  $\mu\text{mol}$ ) and HATU (240 mg, 462  $\mu\text{mol}$ ) were added. The reaction was stirred at 0 °C for 30 min, then warmed to 23 °C for 18 h. The reaction mixture was poured into cold 10% aq citric acid and extracted with EtOAc. The combined organic layers were washed with satd aq  $\text{NaHCO}_3$ , brine, dried, and concentrated. The crude residue was subjected to flash column chromatography ( $\text{SiO}_2$ , 5-65% ethyl acetate in hexanes) to afford the product as a light yellow oil (76 mg, 46%).  $[\alpha]_D^{24}$  - 29 (c 0.39,  $\text{CHCl}_3$ );  $R_f$  = 0.15 (40% EtOAc/hexanes); IR (film) 3419, 2960, 2923, 2853, 1747, 1652, 1540, 1456, 1378, 1261, 1100  $\text{cm}^{-1}$ ;  $^1\text{H}$  NMR (600 MHz,  $\text{CDCl}_3$ )  $\delta$  7.32-7.24 (series of m, 5H), 7.20-7.09 (N-H, series of m, 3H), 5.22-5.09 (series of m, 6H), 5.05 (m, 1H), 4.97 (m, 1H), 4.86 (m, 1H), 4.63 (m, 1H), 3.29-2.69 (series of m, 15H), 1.81-1.75 (series of m, 4H), 1.66 (m, 3H), 1.54 (s, 6H), 1.49 (m, 3H), 1.38-1.28 (series of m, 18H), 1.25-1.17 (series of m, 19H), 0.83-0.77 (series of m, 12H);  $^{13}\text{C}$  NMR (150 MHz,  $\text{CDCl}_3$ ) ppm 172.0, 171.4, 171.1, 170.8, 170.2, 170.0, 169.5, 169.3, 155.0, 135.3, 128.9, 128.6, 128.3, 80.0, 79.7, 73.5, 73.0, 72.3, 71.7, 71.4, 68.6, 67.3, 60.5, 58.8, 55.0, 53.0, 52.5, 35.1, 34.7, (29) 32.1, 31.7, 31.5, 31.4, 31.3, 31.2, 31.1, 30.9, 30.8, 30.7, 29.7, 29.6, 28.2, 28.1, 25.1, 24.8, 24.5, 24.1, 22.5, 22.3, 15.5, 14.3, 14.0, 13.9; HRMS (EI): Exact mass calcd for  $\text{C}_{57}\text{H}_{102}\text{N}_9\text{O}_{11}$   $[\text{M}+\text{NH}_4]^+$  1088.7699, found 1088.7696. MPT-5-237

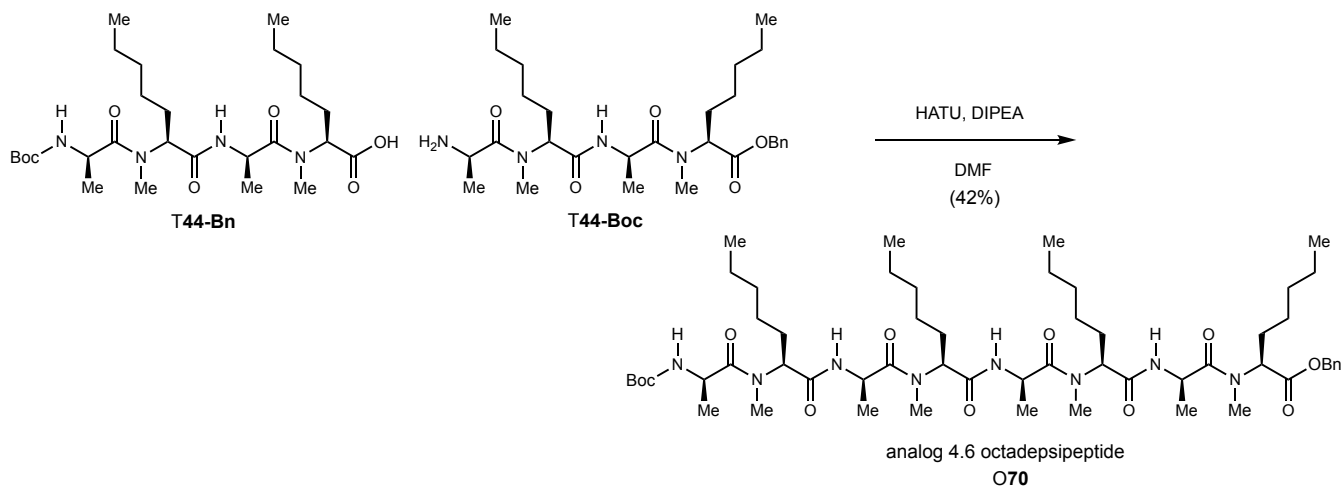

**Benzyl (6R,9S,12R,15S,18R,21S,24R,27S)-2,2,6,8,12,14,18,20,24,26-decamethyl-4,7,10,13,16,19,22,25-octaoxo-9,15,21,27-tetrapentyl-3-oxa-5,8,11,14,17,20,23,26-octaazaocacosan-28-oate (O70).** A round-bottom flask was charged with the amine (170 mg, 316  $\mu\text{mol}$ ), acid (170 mg, 316  $\mu\text{mol}$ ), and DMF (3.0 mL). The mixture was cooled to 0 °C and then DIPEA (136  $\mu\text{L}$ , 948  $\mu\text{mol}$ ) and HATU (291 mg, 559  $\mu\text{mol}$ ) were added. The reaction was stirred at 0 °C for 30 min, then warmed to 23 °C for 18 h. The reaction mixture was poured into cold 10% aq citric acid and extracted with EtOAc. The combined organic layers were washed with satd aq NaHCO<sub>3</sub>, brine, dried, and concentrated. The crude residue was subjected to flash column chromatography (SiO<sub>2</sub>, 5-50% ethyl acetate in hexanes) to afford the product as a light yellow oil (139 mg, 42%).  $[\alpha]_D^{24}$  - 16 (c 0.22, CHCl<sub>3</sub>);  $R_f$  = 0.11 (40% EtOAc/hexanes); IR (film) 3444, 2960, 2931, 2863, 1717, 1694, 1682, 1443, 1326, 1206, 1137 cm<sup>-1</sup>; <sup>1</sup>H NMR (600 MHz, CDCl<sub>3</sub>) This compound exists as a mixture of rotamers causing significant peak broadening and overlap. Refer to the image of the <sup>1</sup>H NMR spectrum; <sup>13</sup>C NMR (150 MHz, CDCl<sub>3</sub>) ppm 172.5, 172.0, 170.9, 170.2, 169.5, 167.3, 166.7, 166.0, 156.0, 134.9, 128.7, 128.6, 128.5, 79.8, 71.5, 67.3, 61.6, 61.1, 55.0, 54.5, 53.4, 51.7, 46.1, 32.2, 31.8, 31.5, 31.4, 31.3, 31.1, 31.0, 30.8, 30.7, 30.6, 30.3, 30.2, 29.8, 29.6, 28.4, 26.2, 25.0, 24.9, 24.8, 24.7, 24.0, 22.4, 15.6, 15.3, 14.7, 14.4, 14.1, 14.0, 13.9; HRMS (EI): Exact mass calcd for C<sub>56</sub>H<sub>100</sub>N<sub>9</sub>O<sub>11</sub> [M+NH<sub>4</sub>]<sup>+</sup> 1074.7542, found 1074.7538. MPT-4-067

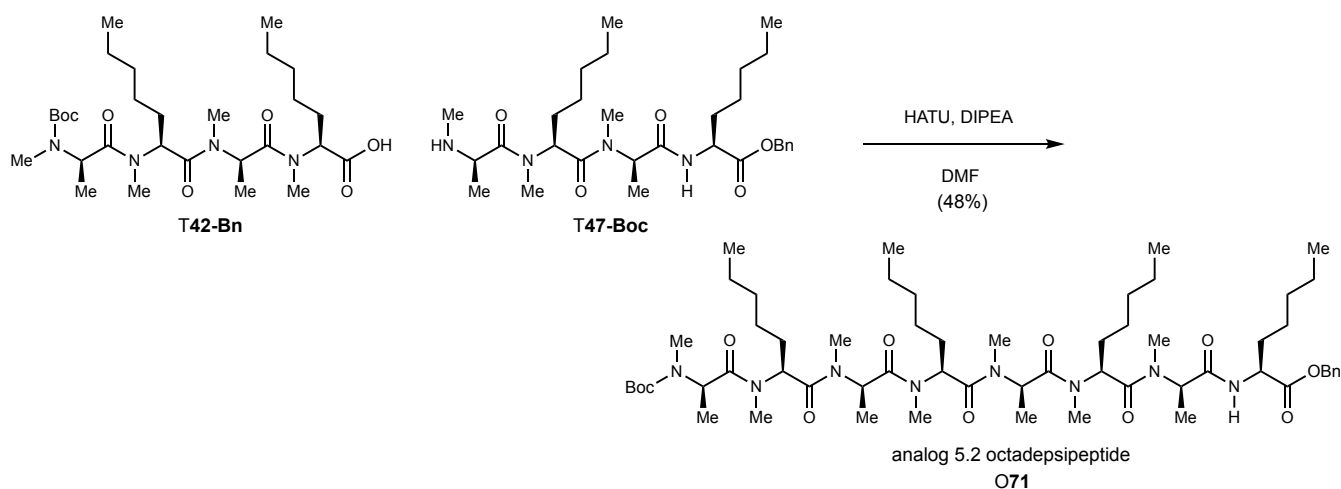

**Benzyl (6R,9S,12R,15S,18R,21S,24R,27S)-2,2,5,6,8,11,12,14,17,18,20,23,24-tridecamethyl-4,7,10,13,16,19,22,25-octaoxo-9,15,21,27-tetrapentyl-3-oxa-5,8,11,14,17,20,23,26-octaazaocacosan-28-oate (O71).** A round-bottom flask was charged with the amine (103 mg, 181  $\mu\text{mol}$ ), acid (99.0 mg, 181  $\mu\text{mol}$ ), and DMF (1.8 mL). The mixture was cooled to 0 °C and then DIPEA (57.2  $\mu\text{L}$ , 543  $\mu\text{mol}$ ) and HATU (282 mg, 543  $\mu\text{mol}$ ) were added. The reaction was stirred at 0 °C for 30 min, then warmed to 23 °C for 18 h. The reaction mixture was poured into cold 10% aq citric acid and extracted with EtOAc. The combined organic layers were washed with satd aq NaHCO<sub>3</sub>, brine, dried, and concentrated. The crude residue was subjected to flash column chromatography (SiO<sub>2</sub>, 5-60% ethyl acetate in hexanes) to afford the product as a light yellow oil (95.9 mg, 48%).  $[\alpha]_D^{24}$  - 13 (c 0.86, CHCl<sub>3</sub>);  $R_f$  = 0.16 (50% EtOAc/hexanes); IR (film) 3317, 2956, 2930, 2859, 1739, 1644, 1525, 1458, 1369, 1275, 1090 cm<sup>-1</sup>; <sup>1</sup>H NMR (600 MHz, CDCl<sub>3</sub>)  $\delta$  7.57 and 6.57 (br m, 1H), 7.41-7.32 (series of m, 5H), 5.23-4.53 (series of m, 10H), 3.16-2.66 (series of m, 21H), 1.83 (m, 3H), 1.77-1.62 (series of m, 5H), 1.52-1.36 (series of m, 20H), 1.38-1.24 (series of m, 25H), 0.91-0.84 (series of m, 12H); <sup>13</sup>C NMR (150 MHz, CDCl<sub>3</sub>) ppm 172.4, 172.2, 172.0, 171.5, 171.2, 170.5, 169.8, 169.6, 156.2, 135.3, 128.5, 128.3, 128.2, 80.9, 74.5, 74.2, 73.7, 72.8, 66.9, 57.4, 49.5, 49.1, 47.9, 34.9, 31.6, 31.4, 31.35, 31.27, 31.2, 31.0, 30.9, 30.8, 29.7, 29.6, 29.3, 28.4, 28.3, 28.2, 24.61, 24.57, 24.50, 24.4, 24.2, 23.9, 22.6,

22.4, 22.3, 22.3, 17.4, 16.4, 14.7, 13.92, 13.89, 13.87, 13.83; HRMS (EI): Exact mass calcd for C<sub>59</sub>H<sub>106</sub>N<sub>9</sub>O<sub>11</sub> [M+NH<sub>4</sub>]<sup>+</sup> 1116.8012, found 1116.8009. MPT-4-105

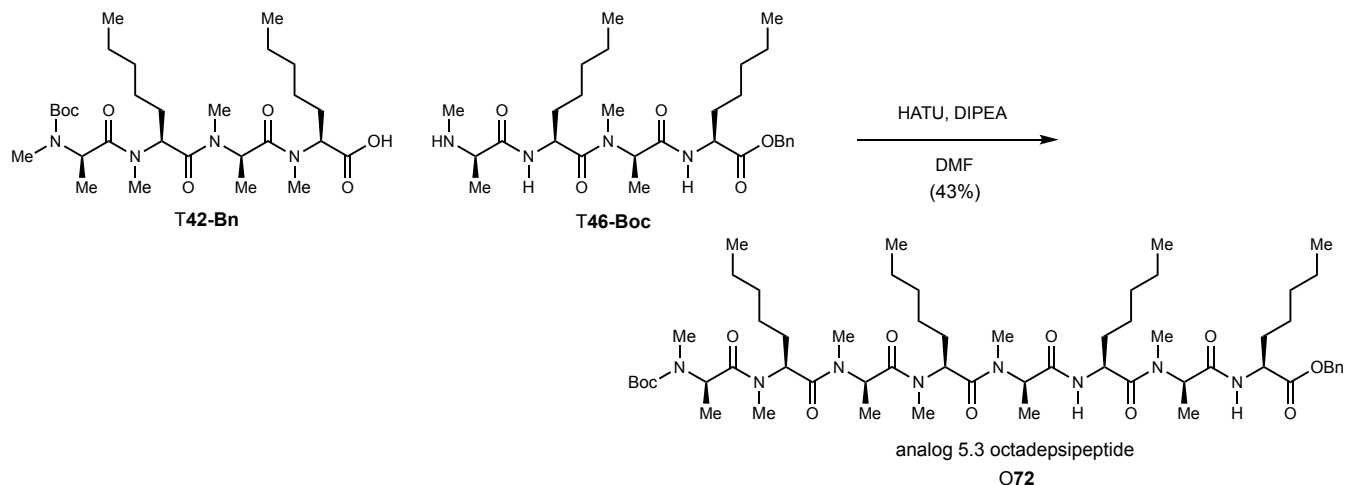

**Benzyl (6R,9S,12R,15S,18R,21S,24R,27S)-2,2,5,6,8,11,12,14,17,18,23,24-dodecamethyl-4,7,10,13,16,19,22,25-octa-oxo-9,15,21,27-tetrapentyl-3-oxa-5,8,11,14,17,20,23,26-octaazaocacosan-28-oate (O72).** A round-bottom flask was charged with the amine (104 mg, 196  $\mu$ mol), acid (112 mg, 196  $\mu$ mol), and DMF (2.0 mL). The mixture was cooled to 0 °C and then DIPEA (62.0  $\mu$ L, 588  $\mu$ mol) and HATU (305 mg, 588  $\mu$ mol) were added. The reaction was stirred at 0 °C for 30 min, then warmed to 23 °C for 18 h. The reaction mixture was poured into cold 10% aq citric acid and extracted with EtOAc. The combined organic layers were washed with satd aq NaHCO<sub>3</sub>, brine, dried, and concentrated. The crude residue was subjected to flash column chromatography (SiO<sub>2</sub>, 5-60% ethyl acetate in hexanes) to afford the product as a light yellow oil (90.2 mg, 43%).  $[\alpha]_D^{24}$  - 12 (c 0.56, CHCl<sub>3</sub>);  $R_f$  = 0.13 (50% EtOAc/hexanes); IR (film) 3300, 2957, 2933, 2861, 1742, 1650, 1458, 1408, 1275, 1086 cm<sup>-1</sup>; <sup>1</sup>H NMR (600 MHz, (CD<sub>3</sub>)<sub>2</sub>CO)  $\delta$  7.29-7.18 (series of m, 5H), 7.07 (br d,  $J$  = 7.9, 1H), 7.02 (br d,  $J$  = 7.6, 1H), 5.22-3.55 (series of m, 10H), 2.96-2.61 (series of m, 18H), 1.88-1.63 (series of m, 6H), 1.60-1.42 (series of m, 3H), 1.34-1.09 (series of m, 44H), 0.85-0.69 (series of m, 12H); <sup>13</sup>C NMR (150 MHz, CDCl<sub>3</sub>) ppm 172.4, 171.1, 170.7, 170.1, 169.9, 169.7, 169.5, 169.3, 155.0, 135.3, 128.6, 128.5, 128.3, 79.6, 73.4, 73.0, 71.7, 71.6, 67.0, 55.0, 52.5, 49.3, 46.1, 42.7, 32.1, 31.6, 31.5, 31.43, 31.38, 31.3, 31.2, 31.1, 30.9, 30.8, 30.7, 29.7, 29.5, 28.3, 25.1, 24.9, 24.9, 24.8, 24.5, 22.42, 22.39, 22.3, 18.7, 18.4, 15.6, 15.4, 14.3, 14.3, 14.0, 13.9; HRMS (EI): Exact mass calcd for C<sub>46</sub>H<sub>85</sub>N<sub>8</sub>O<sub>9</sub> [M-Boc-Bn]<sup>-</sup> 893.6445, found 893.6446. MPT-4-008

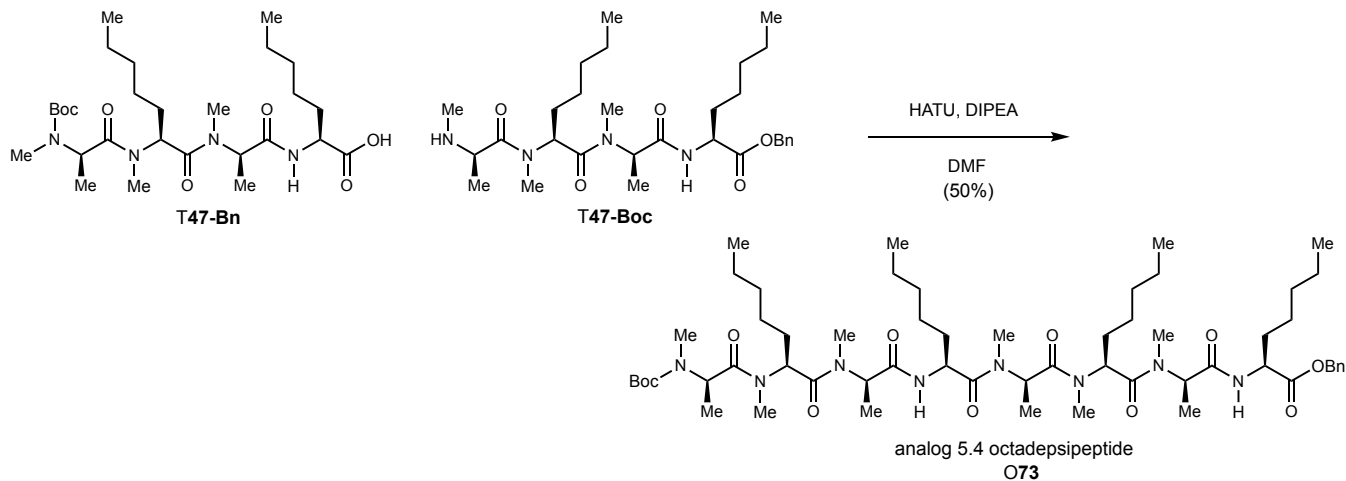

**Benzyl (6R,9S,12R,15S,18R,21S,24R,27S)-2,2,5,6,8,11,12,17,18,20,23,24-dodecamethyl-4,7,10,13,16,19,22,25-octaoxo-9,15,21,27-tetrapentyl-3-oxa-5,8,11,14,17,20,23,26-octaazaocacosan-28-oate (O73).** A round-bottom flask was charged with the amine (68.8 mg, 124  $\mu\text{mol}$ ), acid (68.0 mg, 124  $\mu\text{mol}$ ), and DMF (1.2 mL). The mixture was cooled to 0 °C and then DIPEA (39.2  $\mu\text{L}$ , 372  $\mu\text{mol}$ ) and HATU (193 mg, 462  $\mu\text{mol}$ ) were added. The reaction was stirred at 0 °C for 30 min, then warmed to 23 °C for 18 h. The reaction mixture was poured into cold 10% aq citric acid and extracted with EtOAc. The combined organic layers were washed with satd aq  $\text{NaHCO}_3$ , brine, dried, and concentrated. The crude residue was subjected to flash column chromatography ( $\text{SiO}_2$ , 5-60% ethyl acetate in hexanes) to afford the product as a light yellow oil (66.9 mg, 50%).  $[\alpha]_D^{24} - 27$  (c 0.34,  $\text{CHCl}_3$ );  $R_f = 0.152$  (25% EtOAc/hexanes); IR (film) 3384, 2955, 2932, 2861, 1742, 1651, 1522, 1417, 1392, 1215, 1093  $\text{cm}^{-1}$ ;  $^1\text{H}$  NMR (600 MHz,  $\text{CDCl}_3$ ) This compound exists in multiple conformations, causing significant peak overlap. Refer to image of the  $^1\text{H}$  NMR spectrum;  $^{13}\text{C}$  NMR (150 MHz,  $\text{CDCl}_3$ ) ppm 171.7, 171.6, 171.3, 171.3, 170.7, 170.5, 170.0, 169.3, 155.6, 135.2, 128.6, 128.4, 128.3, 79.9, 79.6, 73.3, 72.9, 72.7, 71.4, 71.3, 71.2, 66.9, 57.5, 56.7, 55.7, 54.5, 38.8, 37.6, 37.2, 37.0, 36.6, 31.4, 31.3, 31.1, 30.9, 30.8, 30.3, 29.8, 29.6, 28.3, 24.9, 24.7, 24.5, 24.4, 23.3, 23.2, 22.8, 22.3, 22.2, 21.0, 14.0, 13.9, 13.84, 13.82; HRMS (EI): Exact mass calcd for  $\text{C}_{58}\text{H}_{104}\text{N}_9\text{O}_{11}$   $[\text{M}+\text{NH}_4]^+$  1102.7855, found 1102.7855. MPT-5-190

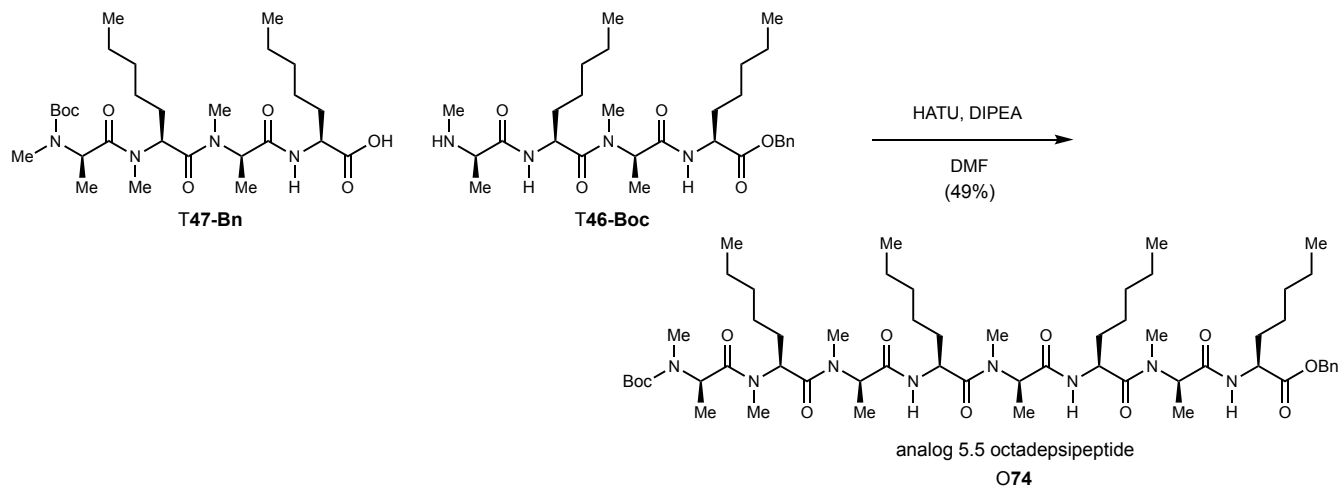

**Benzyl (6R,9S,12R,15S,18R,21S,24R,27S)-2,2,5,6,8,11,12,17,18,23,24-undecamethyl-4,7,10,13,16,19,22,25-octaoxa-9,15,21,27-tetrapentyl-3-oxa-5,8,11,14,17,20,23,26-octaazaocacosan-28-oate (O74).** A round-bottom flask was charged with the amine (104 mg, 187  $\mu\text{mol}$ ), acid (100 mg, 187  $\mu\text{mol}$ ), and DMF (1.9 mL). The mixture was cooled to 0 °C and then DIPEA (59.1  $\mu\text{L}$ , 561  $\mu\text{mol}$ ) and HATU (292 mg, 561  $\mu\text{mol}$ ) were added. The reaction was stirred at 0 °C for 30 min, then warmed to 23 °C for 18 h. The reaction mixture was poured into cold 10% aq citric acid and extracted with EtOAc. The combined organic layers were washed with satd aq  $\text{NaHCO}_3$ , brine, dried, and concentrated. The crude residue was subjected to flash column chromatography ( $\text{SiO}_2$ , 5-60% ethyl acetate in hexanes) to afford the product as a light yellow oil (98.0 mg, 49%).  $[\alpha]_D^{24} - 12$  (c 0.25,  $\text{CHCl}_3$ );  $R_f = 0.22$  (40% EtOAc/hexanes); IR (film) 3429, 2960, 2931, 2862, 1694, 1651, 1633, 1443, 1326, 1206, 1137  $\text{cm}^{-1}$ ;  $^1\text{H}$  NMR (600 MHz,  $\text{CDCl}_3$ ) This compound exists in multiple conformations, causing significant peak overlap. Refer to image of the  $^1\text{H}$  NMR spectrum;  $^{13}\text{C}$  NMR (150 MHz,  $\text{CDCl}_3$ ) ppm 172.4, 171.1, 170.8, 170.4, 169.8, 169.5, 168.9, 168.6, 156.0, 135.2, 128.6, 128.5, 128.3, 80.1, 73.4, 73.1, 73.0, 72.2, 71.9, 71.6, 71.2, 71.1, 67.1, 54.9, 54.4, 53.5, 53.4, 50.8, 49.3, 36.0, 35.9, 32.2, 32.1, 31.3, 31.2, 30.9, 30.7, 30.4, 30.1, 29.7, 28.3, 25.0, 24.9, 24.8, 24.8, 24.6, 24.5, 22.4, 22.3, 15.5, 14.6, 14.2, 13.9; HRMS (EI): Exact mass calcd for  $\text{C}_{57}\text{H}_{108}\text{N}_9\text{O}_{11}$   $[\text{M}+\text{NH}_4]^+$  1088.7699, found 1088.7695. MPT-4-181

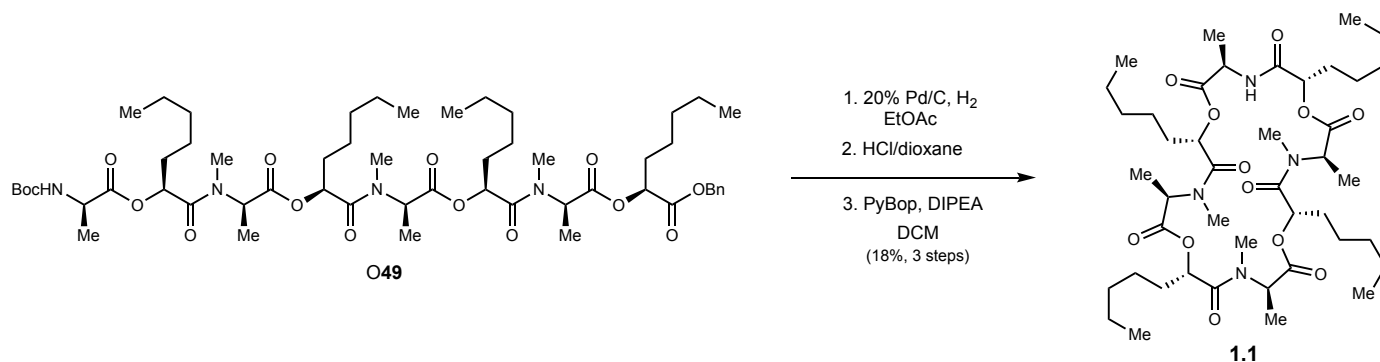

**(3R,6S,9R,12S,15R,18S,21R,24S)-3,4,9,10,15,16,21-heptamethyl-6,12,18,24-tetrapentyl-1,7,13,19-tetraoxa-4,10,16,22-tetraazacyclotetracosan-2,5,8,11,14,17,20,23-octaone (1.1).** A round-bottom flask was charged with the depsipeptide (108 mg, 103  $\mu\text{mol}$ ), dissolved in EtOAc (1.0 mL), and treated with 10% Pd/C (2.2 mg). The reaction flask was evacuated with light vacuum. Hydrogen (balloon) was added, and the flask was cycled once more. The reaction was allowed to stir for 1 h. After purging the flask with argon, the crude reaction mixture was filtered through Celite. To the crude material was added HCl/dioxane (1.0 mL) and the reaction mixture was allowed to stir for 30 min. The reaction mixture was concentrated and added to a flame-dried round bottom flask. DCM (20.8 mL) was added and the reaction was cooled to 0 °C. Once at 0 °C, DIPEA (40.0  $\mu\text{L}$ , 228  $\mu\text{mol}$ ) and PyBop (56.7 mg, 108  $\mu\text{mol}$ ) were added. The reaction was stirred at 0 °C for 1.5 h, and then allowed to warm to ambient temperature to stir for an additional 1 h. The reaction mixture was poured into cold 10% aq citric acid and extracted with DCM. The combined organic layers were washed with satd aq  $\text{NaHCO}_3$ , brine, and then dried and concentrated. Preparative HPLC purification (5 – 95% aqueous acetonitrile, 210 nm, flow rate: 18 mL/min,  $R_t = 20.2$  min) afforded the 24-membered macrocycle (16.8 mg, 18%) as a light yellow oil.  $[\alpha]_D^{24} +25$  (c 0.18,  $\text{CHCl}_3$ );  $R_f = 0.34$  (60% EtOAc in hexanes); IR (film) 3331, 2927, 2855, 2359, 1747, 1653, 15457, 1196  $\text{cm}^{-1}$ ;  $^1\text{H}$  NMR



(600 MHz, CDCl<sub>3</sub>) This compound exists in multiple conformations, causing significant peak overlap. Refer to image of the <sup>1</sup>H NMR spectrum; <sup>13</sup>C NMR (150 MHz, CDCl<sub>3</sub>) This compound exists in multiple conformations, causing significant peak overlap. Refer to image of the <sup>13</sup>C NMR spectrum; HRMS (EI): Exact mass calcd for C<sub>43</sub>H<sub>76</sub>N<sub>4</sub>O<sub>13</sub> [M+CH<sub>3</sub>OH]<sup>+</sup> 856.5409 found [856.5443]. MPT-3-261

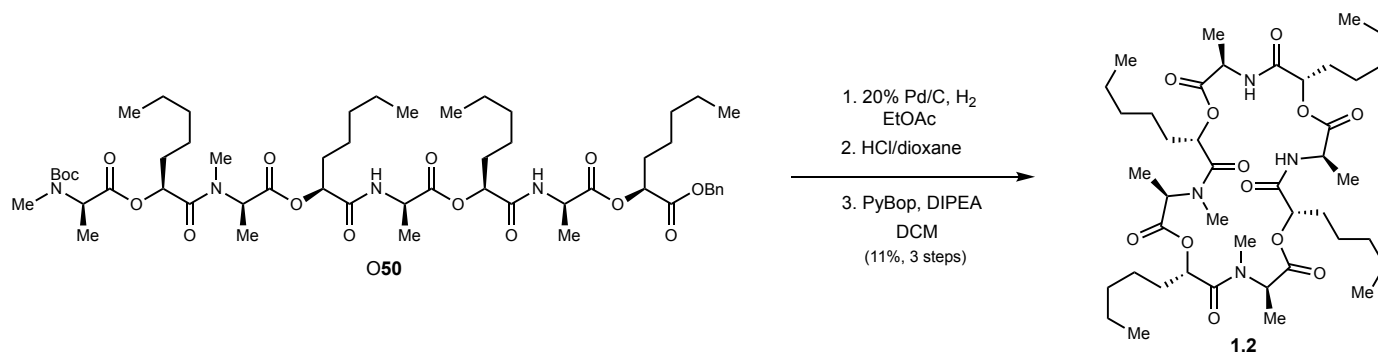

**(3*R*,6*S*,9*R*,12*S*,15*R*,18*S*,21*R*,24*S*)-3,4,9,10,15,21-hexamethyl-6,12,18,24-tetrapentyl-1,7,13,19-tetraoxa-4,10,16,22-tetraazacyclotetracosan-2,5,8,11,14,17,20,23-octaone (1.2).** A round-bottom flask was charged with the depsipeptide (130 mg, 126 μmol), dissolved in EtOAc (1.3 mL), and treated with 10% Pd/C (2.7 mg). The reaction flask was evacuated with light vacuum. Hydrogen (balloon) was added, and the flask was cycled once more. The reaction was allowed to stir for 1 h. After purging the flask with argon, the crude reaction mixture was filtered through Celite. To the crude material was added HCl/dioxane (1.0 mL) and the reaction mixture was allowed to stir for 30 min. The reaction mixture was concentrated and added to a flame-dried round bottom flask. DCM (25.0 mL) was added and the reaction was cooled to 0 °C. Once at 0 °C, DIPEA (48.0 μL, 275 μmol) and PyBop (68.4 mg, 131 μmol) were added. The reaction was stirred at 0 °C for 1.5 h, and then allowed to warm to ambient temperature to stir for an additional 1 h. The reaction mixture was poured into cold 10% aq citric acid and extracted with DCM. The combined organic layers were washed with satd aq NaHCO<sub>3</sub>, brine, and then dried and concentrated. Preparative HPLC purification (5 – 95% aqueous acetonitrile, 210 nm, flow rate: 18 mL/min, R<sub>t</sub> = 20.2 m) afforded the 24-membered macrocycle (24.6 mg, 11%) as a light yellow oil. [ $\alpha$ ]<sub>D</sub><sup>24</sup> +19 (c 0.27, CHCl<sub>3</sub>); R<sub>f</sub> = 0.42 (60% EtOAc in hexanes); IR (film) 3300, 2954, 2928, 2859, 1744, 1648, 1546, 1460, 1219, 1082 cm<sup>-1</sup>; <sup>1</sup>H NMR (600 MHz, CDCl<sub>3</sub>) This compound exists in multiple conformations, causing significant peak overlap. Refer to image of the <sup>1</sup>H NMR spectrum; <sup>13</sup>C NMR (150 MHz, CDCl<sub>3</sub>) This compound exists in multiple conformations, causing significant peak overlap. Refer to image of the <sup>13</sup>C NMR spectrum; HRMS (EI): Exact mass calcd for C<sub>42</sub>H<sub>72</sub>N<sub>4</sub>O<sub>12</sub>Na [M+Na]<sup>+</sup> 847.5045, found 847.5046. MPT-2-169

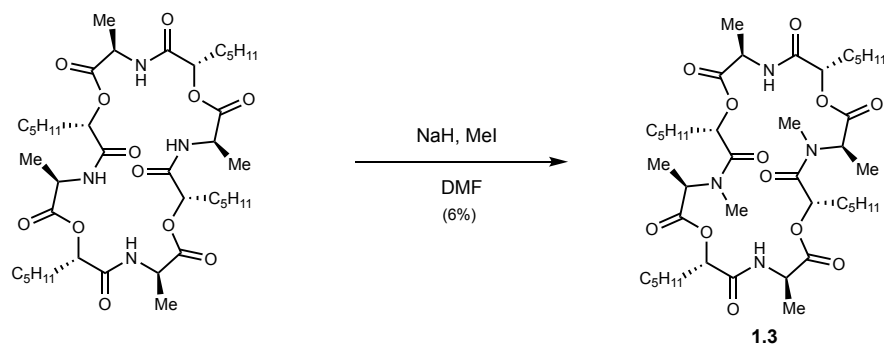

**(3R,6S,9R,12S,15R,18S,21R,24S)-3,4,9,15,16,21-hexamethyl-6,12,18,24-tetrapentyl-1,7,13,19-tetraoxa-4,10,16,22-tetraazacyclotetracosan-2,5,8,11,14,17,20,23-octaone (1.3).** A flame-dried round-bottom flask was charged with N-H decapeptide (30.0 mg, 37.6  $\mu\text{mol}$ ) and dry DMF (527  $\mu\text{L}$ ) at 0 °C. Methyl iodide (94  $\mu\text{L}$ , 1.51 mmol) was then added to the reaction mixture, and NaH (9.0 mg, 380  $\mu\text{mol}$  in DMF (225  $\mu\text{L}$ )) was added in 3 aliquots of 75  $\mu\text{L}$  over 15 m. The reaction was allowed to stir at 0 °C for 20 m, and it was then quenched by the dropwise addition of satd aq  $\text{NH}_4\text{Cl}$ . The aqueous layer was extracted with EtOAc. The combined organic layers were washed with satd aq  $\text{NaHCO}_3$ , satd aq  $\text{Na}_2\text{S}_2\text{O}_3$ , water, brine, dried, concentrated. The residue was subjected to flash column chromatography ( $\text{SiO}_2$ , 1-10% methanol in dichloromethane) to afford 2 mg (6%) of the desired macrocycle as a colorless foam, as well as 9.3 mg (31%) of *ent*-verticillide.  $[\alpha]_D^{24} +11$  (c 0.06,  $\text{CHCl}_3$ );  $R_f = 0.40$  (4% MeOH/DCM); IR (film) 3298, 2926, 2856, 1739, 1644, 1556, 1455, 1261, 1092  $\text{cm}^{-1}$ ;  $^1\text{H}$  NMR (600 MHz,  $\text{CDCl}_3$ ) This compound exists in multiple conformations, causing significant peak overlap. Refer to image of the  $^1\text{H}$  NMR spectrum;  $^{13}\text{C}$  NMR (150 MHz,  $\text{CDCl}_3$ ) This compound exists in multiple conformations, causing significant peak overlap. Refer to image of the  $^{13}\text{C}$  NMR spectrum; HRMS (EI): Exact mass calcd for  $\text{C}_{42}\text{H}_{76}\text{N}_5\text{O}_{12}$   $[\text{M}+\text{NH}_4]^+$  842.5490, found [842.5482]. MPT-5-040

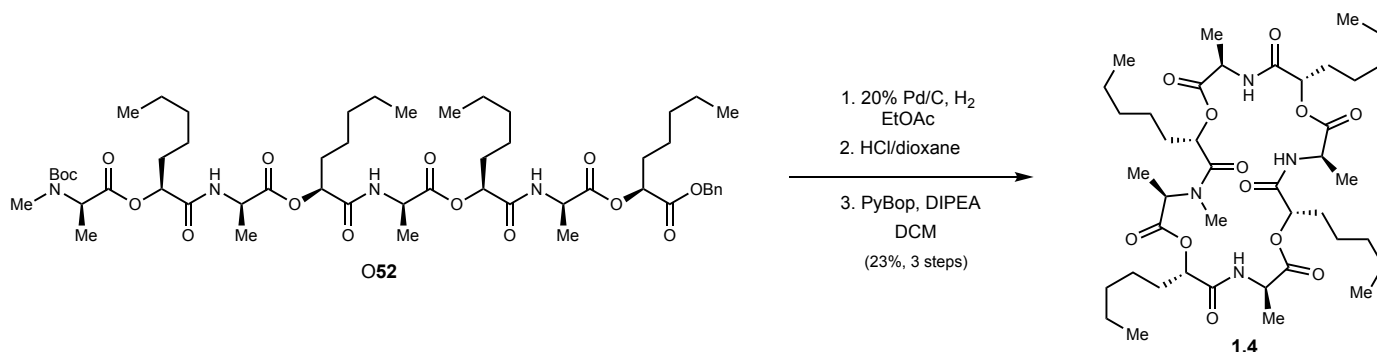

**(3R,6S,9R,12S,15R,18S,21R,24S)-3,4,9,15,21-pentamethyl-6,12,18,24-tetrapentyl-1,7,13,19-tetraoxa-4,10,16,22-tetraazacyclotetracosan-2,5,8,11,14,17,20,23-octaone (1.4).** A round-bottom flask was charged with the decapeptide (200 mg, 246  $\mu\text{mol}$ ), dissolved in EtOAc (2.5 mL), and treated with 10% Pd/C (4.1 mg). The reaction flask was evacuated with light vacuum. Hydrogen (balloon) was added, and the flask was cycled once more. The reaction was allowed to stir for 1 h. After purging the flask with argon, the crude reaction mixture was filtered through Celite. To the crude material was added HCl/dioxane (1.0 mL) and the reaction mixture was allowed to stir for 30 min. The reaction mixture was concentrated and added to a flame-dried round bottom flask. DCM (38.5 mL) was added and the reaction was cooled to

0 °C. Once at 0 °C, DIPEA (73.8  $\mu$ L, 422  $\mu$ mol) and PyBop (105 mg, 201  $\mu$ mol) were added. The reaction was stirred at 0 °C for 1.5 h, and then allowed to warm to ambient temperature to stir for an additional 1 h. The reaction mixture was poured into cold 10% aq citric acid and extracted with DCM. The combined organic layers were washed with satd aq NaHCO<sub>3</sub>, brine, and then dried and concentrated. Preparative HPLC purification (5 – 95% aqueous acetonitrile, 210 nm, flow rate: 18 mL/min, R<sub>t</sub> = 20.2 m) afforded the 24-membered macrocycle (29.0 mg, 23%) as a white amorphous solid [ $\alpha$ ]<sub>D</sub><sup>24</sup> +25 (c 0.98, CHCl<sub>3</sub>); R<sub>f</sub> = 0.33 (60% EtOAc in hexanes); IR (film) 3284, 2929, 2860, 2359, 1744, 1649, 1555, 1456, 1377, 1210 cm<sup>-1</sup>; <sup>1</sup>H NMR (600 MHz, CDCl<sub>3</sub>)  $\delta$  7.70 (br d, 1H), 7.17 (br m, 2H), 5.09 (br m, 2H), 5.00 (dd, *J* = 8.9, 6.0 Hz, 1H), 4.88 (dd, *J* = 5.8, 5.8 Hz, 1H), 4.61 (br m, 2H), 4.06 (br s, 1H), 3.80 (br s, 1H), 3.17 (s, 3H), 2.02-1.93 (m, 2H), 1.88-1.60 (series of m, 8H), 1.52-1.46 (series of m, 8H), 1.42 (br d, *J* = 6.5 Hz, 4H), 1.34-1.24 (series of m, 22H), 0.93-0.86 (series of m, 12H); <sup>13</sup>C NMR (150 MHz, CDCl<sub>3</sub>) ppm 171.9, 171.7, 170.7, 170.5, 170.4, 170.0, 169.7, 169.2, 74.4, 74.3, 58.9, 49.2, 48.0, 47.7, 35.7, 31.7, 31.6, 31.5, 31.4, 31.35, 31.33, 31.25, 31.18, 31.0, 30.3, 29.7, 29.6, 25.3, 25.1, 25.0, 24.4, 22.6, 22.5, 22.4, 17.7, 16.7, 16.2, 14.0, 13.9, 13.9, 13.5; HRMS (EI): Exact mass calcd for C<sub>41</sub>H<sub>74</sub>N<sub>5</sub>O<sub>12</sub> [M+NH<sub>4</sub>]<sup>+</sup> 828.5334, found [828.5316]. MPT-3-237

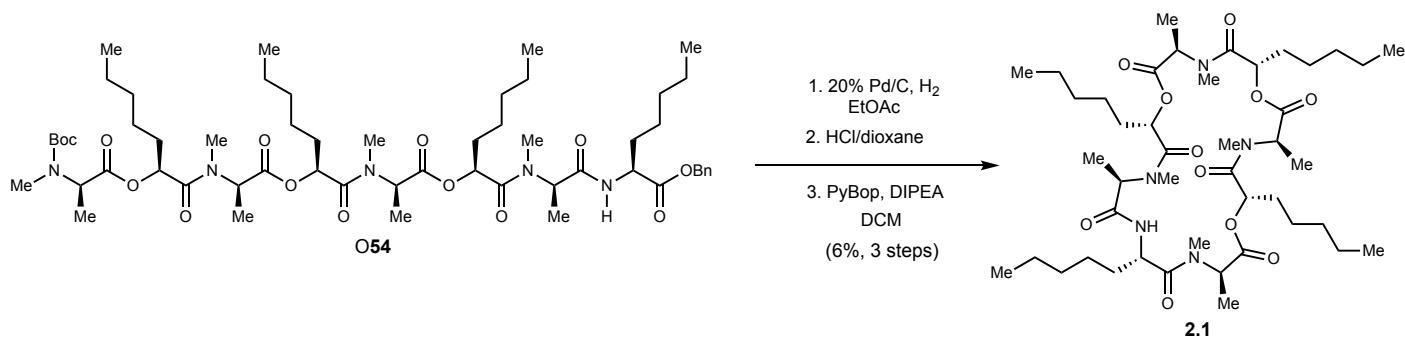

**(3R,6S,9R,12S,15R,18S,21R,24S)-3,4,9,10,15,16,21,22-octamethyl-6,12,18,24-tetrapentyl-1,7,13-trioxa-4,10,16,19,22-pentaazacyclotetracosan-2,5,8,11,14,17,20,23-octaone (2.1).** A round-bottom flask was charged with the depsipeptide (100 mg, 94.4  $\mu$ mol), dissolved in EtOAc (944  $\mu$ L), and treated with 10% Pd/C (20.0 mg). The reaction flask was evacuated with light vacuum. Hydrogen (balloon) was added, and the flask was cycled once more. The reaction was allowed to stir for 1 h. After purging the flask with argon, the crude reaction mixture was filtered through Celite. To the crude material was added 4M HCl/dioxane (1.0 mL) and the reaction mixture was allowed to stir for 30 min. The reaction mixture was concentrated and added to a flame-dried round bottom flask. DCM (18.9 mL) was added and the reaction was cooled to 0 °C. Once at 0 °C, DIPEA (49.3  $\mu$ L, 283  $\mu$ mol) and PyBop (51.8 mg, 99.1  $\mu$ mol) were added. The reaction was stirred at 0 °C for 1.5 h, and then allowed to warm to ambient temperature to stir for an additional 1 h. The reaction mixture was poured into cold 10% aq citric acid and extracted with DCM. The combined organic layers were washed with satd aq NaHCO<sub>3</sub>, brine, and then dried and concentrated. Preparative HPLC purification (5 – 95% aqueous acetonitrile, 210 nm, flow rate: 18 mL/min, R<sub>t</sub> = 20.5 m) afforded the 24-membered macrocycle (6.24 mg, 6.0%) as a light yellow oil. [ $\alpha$ ]<sub>D</sub><sup>24</sup> – 6.2 (c 0.29, CHCl<sub>3</sub>); R<sub>f</sub> = 0.50 (30% EtOAc in hexanes); IR (film) 3381, 2955, 2925, 2854, 1744, 1660, 1540, 1260, 1093 cm<sup>-1</sup>; <sup>1</sup>H NMR (600 MHz, CDCl<sub>3</sub>) This compound exists in multiple conformations, causing significant peak overlap. Refer to image of the <sup>1</sup>H NMR spectrum; <sup>13</sup>C NMR (150 MHz, CDCl<sub>3</sub>) This compound exists in multiple conformations, causing significant peak overlap. Refer to image of the <sup>13</sup>C NMR spectrum; HRMS (EI): Exact mass calcd for C<sub>44</sub>H<sub>78</sub>N<sub>5</sub>O<sub>11</sub> [M+H]<sup>+</sup> 852.5698, found 852.6592. MPT-2-201

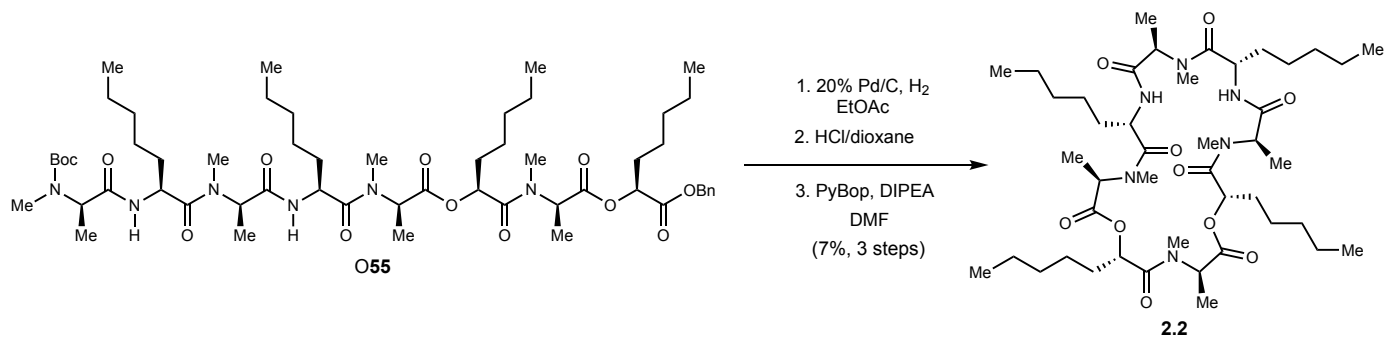

**(3*R*,6*S*,9*R*,12*S*,15*R*,18*S*,21*R*,24*S*)-3,4,9,10,15,16,21,22-octamethyl-6,12,18,24-tetrapentyl-1,7,13-trioxa-4,10,16,19,22-pentaazacyclotetracosan-2,5,8,11,14,17,20,23-octaone (2.2).** A round-bottom flask was charged with the depsipeptide (150 mg, 142  $\mu\text{mol}$ ), dissolved in EtOAc (1.9 mL), and treated with 10% Pd/C (30 mg). The reaction flask was evacuated with light vacuum. Hydrogen (balloon) was added, and the flask was cycled once more. The reaction was allowed to stir for 1 h. After purging the flask with argon, the crude reaction mixture was filtered through Celite. To the crude material was added 4M HCl/dioxane (1.0 mL) and the reaction mixture was allowed to stir for 30 min. The reaction mixture was concentrated and added to a flame-dried round bottom flask. DMF (24.0 mL) was added and the reaction was cooled to 0  $^{\circ}\text{C}$ . Once at 0  $^{\circ}\text{C}$ , DIPEA (66.0  $\mu\text{L}$ , 426  $\mu\text{mol}$ ) and PyBop (111 mg, 213  $\mu\text{mol}$ ) were added. The reaction was stirred at 0  $^{\circ}\text{C}$  for 1.5 h, and then allowed to warm to ambient temperature to stir for an additional 1 h. The reaction mixture was poured into cold 10% aq citric acid and extracted with EtOAc. The combined organic layers were washed with satd aq  $\text{NaHCO}_3$ , brine, and then dried and concentrated. Preparative HPLC purification (5 – 95% aqueous acetonitrile, 210 nm, flow rate: 18 mL/min,  $R_t = 24.2$  m) afforded the 24-membered macrocycle (8.43 mg, 7.0%) as a light yellow oil.  $[\alpha]_D^{24} - 13$  ( $c$  0.15,  $\text{CHCl}_3$ );  $R_f = 0.50$  (50% EtOAc in hexanes); IR (film) 3443, 2959, 2920, 2851, 1650, 1633, 1556, 1455  $\text{cm}^{-1}$ ;  $^1\text{H}$  NMR (600 MHz,  $\text{CDCl}_3$ ) This compound exists in multiple conformations, causing significant peak overlap. Refer to image of the  $^1\text{H}$  NMR spectrum;  $^{13}\text{C}$  NMR (150 MHz,  $\text{CDCl}_3$ ) This compound exists in multiple conformations, causing significant peak overlap. Refer to image of the  $^{13}\text{C}$  NMR spectrum; HRMS (EI): Exact mass calcd for  $\text{C}_{44}\text{H}_{79}\text{N}_6\text{O}_{10}$   $[\text{M}+\text{H}]^+$  851.5858, found 851.5853. MPT-2-293

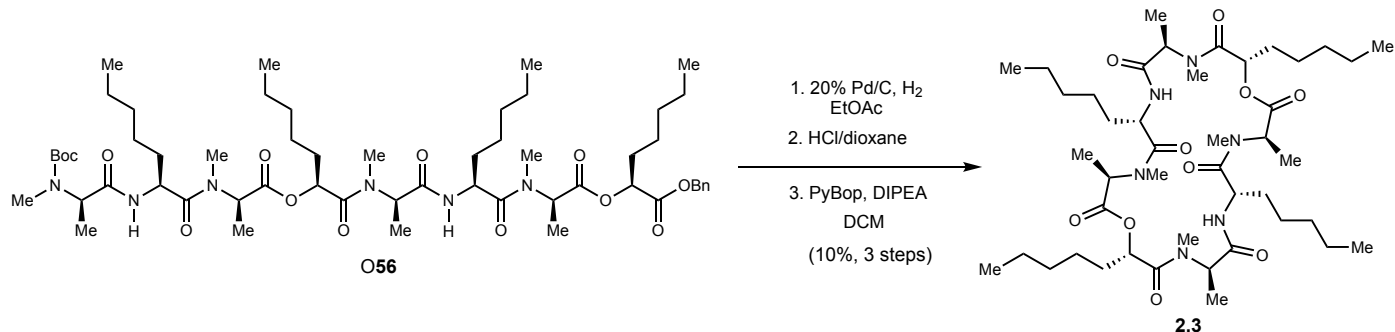

**(3R,6S,9R,12S,15R,18S,21R,24S)-3,4,9,10,15,16,21,22-octamethyl-6,12,18,24-tetrapentyl-1,13-dioxa-4,7,10,16,19,22-hexaazacyclotetracosan-2,5,8,11,14,17,20,23-octaone (2.3).** A round-bottom flask was charged with the decapeptide (97.0 mg, 92.0  $\mu$ mol), dissolved in EtOAc (2.0 mL), and treated with 10% Pd/C (2.0 mg). The reaction flask was evacuated with light vacuum. Hydrogen (balloon) was added, and the flask was cycled once more. The reaction was allowed to stir for 1 h. After purging the flask with argon, the crude reaction mixture was filtered through Celite. To the crude material was added 4M HCl/dioxane (1.0 mL) and the reaction mixture was allowed to stir for 30 min. The reaction mixture was concentrated and added to a flame-dried round bottom flask. DCM (18.0 mL) was added and the reaction was cooled to 0 °C. Once at 0 °C, DIPEA (35.0  $\mu$ L, 200  $\mu$ mol) and PyBop (50.0 mg, 97.0  $\mu$ mol) were added. The reaction was stirred at 0 °C for 1.5 h, and then allowed to warm to ambient temperature to stir for an additional 1 h. The reaction mixture was poured into cold 10% aq citric acid and extracted with DCM. The combined organic layers were washed with satd aq NaHCO<sub>3</sub>, brine, and then dried and concentrated. Preparative HPLC purification (5 – 95% aqueous acetonitrile, 210 nm, flow rate: 18 mL/min, R<sub>t</sub> = 22.2 m) afforded the 24-membered macrocycle (7.8 mg, 10.0%) as a light yellow oil. [ $\alpha$ ]<sub>D</sub><sup>24</sup> - 16 (c 0.23, CHCl<sub>3</sub>); R<sub>f</sub> = 0.43 (50% EtOAc in hexanes); IR (film) 3478, 2922, 2851, 1740, 1633, 1455, 1260 cm<sup>-1</sup>; <sup>1</sup>H NMR (600 MHz, CDCl<sub>3</sub>) This compound exists in multiple conformations, causing significant peak overlap. Refer to image of the <sup>1</sup>H NMR spectrum; <sup>13</sup>C NMR (150 MHz, CDCl<sub>3</sub>) This compound exists in multiple conformations, causing significant peak overlap. Refer to image of the <sup>13</sup>C NMR spectrum; HRMS (EI): Exact mass calcd for C<sub>44</sub>H<sub>82</sub>N<sub>7</sub>O<sub>10</sub> [M+NH<sub>4</sub>]<sup>+</sup> 868.6123, found 868.6119. MPT-2-267

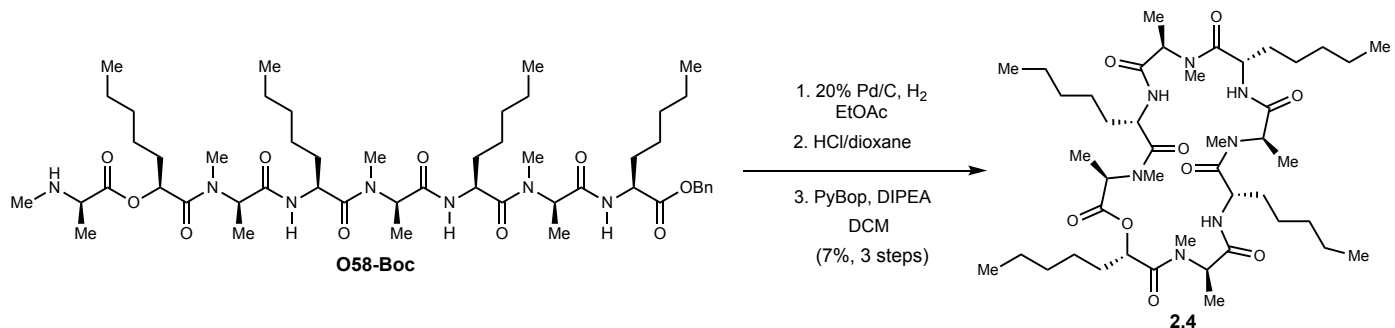

**(3R,6S,9R,12S,15R,18S,21R,24S)-3,4,9,10,15,16,21,22-octamethyl-6,12,18,24-tetrapentyl-1-oxa-4,7,10,13,16,19,22-heptaazacyclotetracosan-2,5,8,11,14,17,20,23-octaone (2.4).** A round-bottom flask was charged with the decapeptide (204 mg, 193  $\mu$ mol), dissolved in EtOAc (1.9 mL), and treated with 10% Pd/C (4.90 mg). The reaction flask was evacuated with light vacuum. Hydrogen (balloon) was added, and the flask was cycled once more. The reaction was allowed to stir for 1 h. After purging the flask with argon, the crude reaction mixture was filtered through Celite. To the crude material

was added HCl/dioxane (1.0 mL) and the reaction mixture was allowed to stir for 30 min. The reaction mixture was concentrated and added to a flame-dried round bottom flask. DCM (38.6 mL) was added and the reaction was cooled to 0 °C. Once at 0 °C, DIPEA (73.9  $\mu$ L, 424  $\mu$ mol) and PyBop (105 mg, 202  $\mu$ mol) were added. The reaction was stirred at 0 °C for 1.5 h, and then allowed to warm to ambient temperature to stir for an additional 1 h. The reaction mixture was poured into cold 10% aq citric acid and extracted with DCM. The combined organic layers were washed with satd aq NaHCO<sub>3</sub>, brine, and then dried and concentrated. Preparative HPLC purification (5 – 95% aqueous acetonitrile, 210 nm, flow rate: 18 mL/min, R<sub>t</sub> = 24.2 m) afforded the 24-membered macrocycle (12.0 mg, 7.3%) as a yellow oil.  $[\alpha]_D^{24} + 6.0$  (c 0.14, CHCl<sub>3</sub>); R<sub>f</sub> = 0.41 (60% EtOAc in hexanes); IR (film) 3389, 2952, 2851, 1743, 1633, 1455, 1165 cm<sup>-1</sup>; <sup>1</sup>H NMR (600 MHz, CDCl<sub>3</sub>) This compound exists in multiple conformations, causing significant peak overlap. Refer to image of the <sup>1</sup>H NMR spectrum; <sup>13</sup>C NMR (150 MHz, CDCl<sub>3</sub>) This compound exists in multiple conformations, causing significant peak overlap. Refer to image of the <sup>13</sup>C NMR spectrum; HRMS (EI): Exact mass calcd for C<sub>44</sub>H<sub>83</sub>N<sub>8</sub>O<sub>9</sub> [M+NH<sub>4</sub>]<sup>+</sup> 867.6283, found 867.6283. MPT-3-015

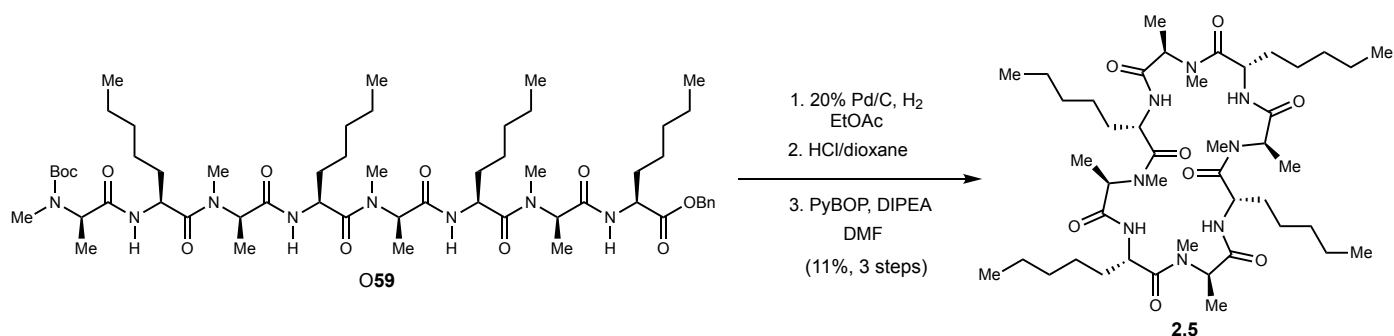

**(3S,6R,9S,12R,15S,18R,21S,24R)-1,6,7,12,13,18,19,24-octamethyl-3,9,15,21-tetrapentyl-1,4,7,10,13,16,19,22-octaazacyclotetracosan-2,5,8,11,14,17,20,23-octaone (2.5).** A round-bottom flask was charged with the depsipeptide (116 mg, 110  $\mu$ mol), dissolved in EtOAc (1.1 mL), and treated with 10% Pd/C (2.4 mg). The reaction flask was evacuated with light vacuum. Hydrogen (balloon) was added, and the flask was cycled once more. The reaction was allowed to stir for 1 h. After purging the flask with argon, the crude reaction mixture was filtered through Celite. To the crude material was added 4M HCl/dioxane (1.00 mL) and the reaction mixture was allowed to stir for 30 min. The reaction mixture was concentrated and added to a flame-dried round bottom flask. DMF (24.0 mL) was added and the reaction was cooled to 0 °C. Once at 0 °C, DIPEA (43.4  $\mu$ L, 330  $\mu$ mol) and PyBop (60.0 mg, 115  $\mu$ mol) were added. The reaction was stirred at 0 °C for 1.5 h, and then allowed to warm to ambient temperature to stir for an additional 1 h. The reaction mixture was poured into cold 10% aq citric acid and extracted with EtOAc. The combined organic layers were washed with satd aq NaHCO<sub>3</sub>, brine, and then dried and concentrated. Preparative HPLC purification (5 – 95% aqueous acetonitrile, 210 nm, flow rate: 18 mL/min, R<sub>t</sub> = 23.1 m) afforded the 24-membered macrocycle (10.2 mg, 11.0%) as a light yellow oil.  $[\alpha]_D^{24} - 11$  (c 0.29, CHCl<sub>3</sub>); R<sub>f</sub> = 0.33 (50% EtOAc in hexanes); IR (film) 3292, 2929, 1654, 1637, 1560, 1458 cm<sup>-1</sup>; <sup>1</sup>H NMR (600 MHz, CDCl<sub>3</sub>) This compound exists in multiple conformations, causing significant peak overlap. Refer to image of the <sup>1</sup>H NMR spectrum; <sup>13</sup>C NMR (150 MHz, CDCl<sub>3</sub>) This compound exists in multiple conformations, causing significant peak overlap. Refer to image of the <sup>13</sup>C NMR spectrum; HRMS (EI): Exact mass calcd for C<sub>44</sub>H<sub>84</sub>N<sub>9</sub>O<sub>8</sub> [M+NH<sub>4</sub>]<sup>+</sup> 866.6443, found 866.6440. MPT-2-290

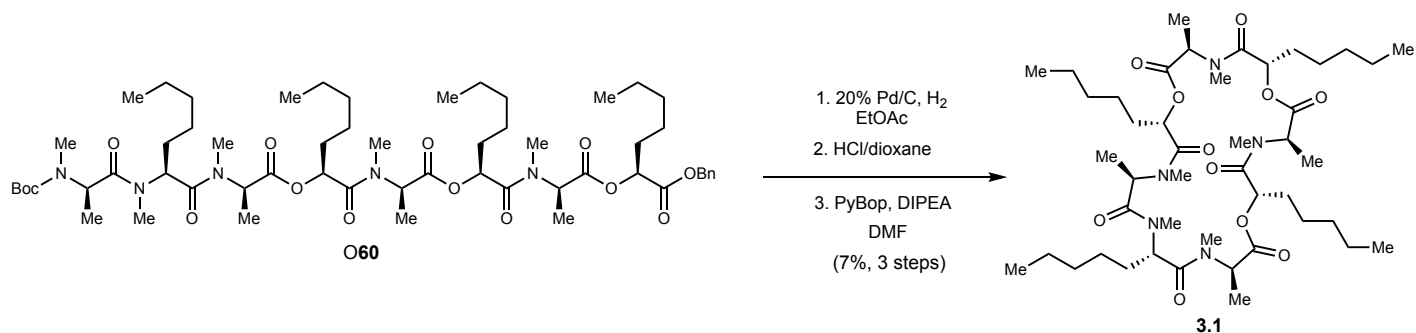

**(3R,6S,9R,12S,15R,18S,21R,24S)-3,4,9,10,15,16,19,21,22-nonamethyl-6,12,18,24-tetrapentyl-1,7,13-trioxa-**

**4,10,16,19,22-pentaazacyclotetracosan-2,5,8,11,14,17,20,23-octaone (3.1).** A round-bottom flask was charged with the depsipeptide (189 mg, 176  $\mu$ mol), dissolved in EtOAc (1.8 mL), and treated with 10% Pd/C (37.8 mg). The reaction flask was evacuated with light vacuum. Hydrogen (balloon) was added, and the flask was cycled once more. The reaction was allowed to stir for 1 h. After purging the flask with argon, the crude reaction mixture was filtered through Celite. To the crude material was added 4M HCl/dioxane (1.00 mL) and the reaction mixture was allowed to stir for 30 min. The reaction mixture was concentrated and added to a flame-dried round bottom flask. DMF (49.5 mL) was added and the reaction was cooled to 0 °C. Once at 0 °C, DIPEA (49.5  $\mu$ L, 284  $\mu$ mol) and PyBop (70.6 mg, 129  $\mu$ mol) were added. The reaction was stirred at 0 °C for 1.5 h, and then allowed to warm to ambient temperature to stir for an additional 1 h. The reaction mixture was poured into cold 10% aq citric acid and extracted with EtOAc. The combined organic layers were washed with satd aq NaHCO<sub>3</sub>, brine, and then dried and concentrated. Preparative HPLC purification (5 – 95% aqueous acetonitrile, 210 nm, flow rate: 18 mL/min, R<sub>t</sub> = 23.0 m) afforded the 24-membered macrocycle (7.6 mg, 5.1%) as a yellow oil.  $[\alpha]_D^{24} + 5.0$  (c 0.19, CHCl<sub>3</sub>); R<sub>f</sub> = 0.48 (50% EtOAc/EtOAc in hexanes); IR (film) 2930, 2861, 1747, 1715, 1669, 1539, 1157 cm<sup>-1</sup>; <sup>1</sup>H NMR (600 MHz, CDCl<sub>3</sub>) This compound exists in multiple conformations, causing significant peak overlap. Refer to image of the <sup>1</sup>H NMR spectrum; <sup>13</sup>C NMR (150 MHz, CDCl<sub>3</sub>) This compound exists in multiple conformations, causing significant peak overlap. Refer to image of the <sup>13</sup>C NMR spectrum; HRMS (EI): Exact mass calcd for C<sub>45</sub>H<sub>83</sub>N<sub>6</sub>O<sub>11</sub> [M+NH<sub>4</sub>]<sup>+</sup> 883.6120, found 883.6122. MPT-3-078

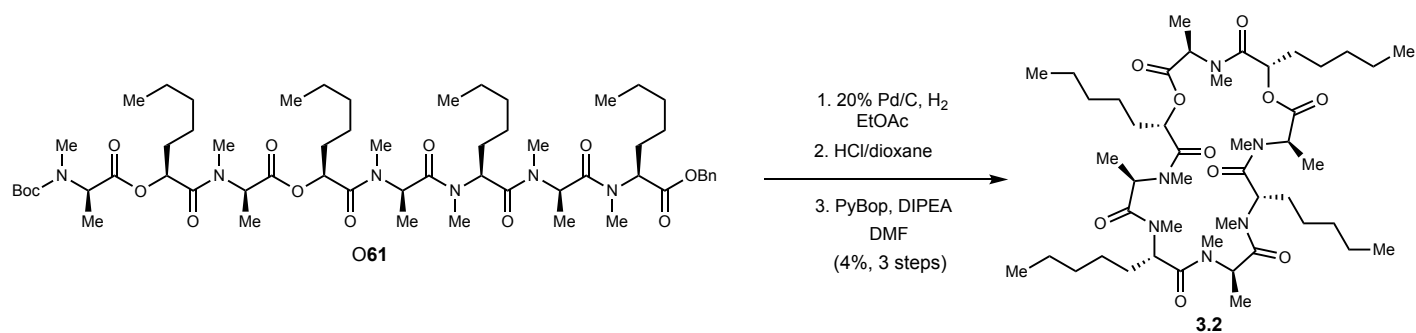

**(3R,6S,9R,12S,15R,18S,21R,24S)-3,4,9,10,13,15,16,19,21,22-decamethyl-6,12,18,24-tetrapentyl-1,7-dioxa-**

**4,10,13,16,19,22-hexaazacyclotetracosan-2,5,8,11,14,17,20,23-octaone (3.2).** A round-bottom flask was charged with the depsipeptide (149 mg, 138  $\mu$ mol), dissolved in EtOAc (1.4 mL), and treated with 10% Pd/C (29.8 mg). The reaction flask was evacuated with light vacuum. Hydrogen (balloon) was added, and the flask was cycled once more. The reaction was allowed to stir for 1 h. After purging the flask with argon, the crude reaction mixture was filtered through Celite. To the crude material was added 4M HCl/dioxane (1.0 mL) and the reaction mixture was allowed to stir for 30 min. The reaction

mixture was concentrated and added to a flame-dried round bottom flask. DMF (48.0 mL) was added and the reaction was cooled to 0 °C. Once at 0 °C, DIPEA (55.0 μL, 414 μmol) and PyBop (76.0 mg, 150 μmol) were added. The reaction was stirred at 0 °C for 1.5 h, and then allowed to warm to ambient temperature to stir for an additional 1 h. The reaction mixture was poured into cold 10% aq citric acid and extracted with EtOAc. The combined organic layers were washed with satd aq NaHCO<sub>3</sub>, brine, and then dried and concentrated. Preparative HPLC purification (5 – 95% aqueous acetonitrile, 210 nm, flow rate: 18 mL/min, R<sub>t</sub> = 23.0 m) afforded the 24-membered macrocycle (4.80 mg, 4.0%) as a yellow oil. [ $\alpha$ ]<sub>D</sub><sup>24</sup> - 13 (c 0.15, CHCl<sub>3</sub>); R<sub>f</sub> = 0.40 (60% EtOAc in hexanes); IR (film) 2930, 2850, 1744, 1698, 1456, 1156 cm<sup>-1</sup>; <sup>1</sup>H NMR (600 MHz, CDCl<sub>3</sub>) This compound exists in multiple conformations, causing significant peak overlap. Refer to image of the <sup>1</sup>H NMR spectrum; <sup>13</sup>C NMR (150 MHz, CDCl<sub>3</sub>) This compound exists in multiple conformations, causing significant peak overlap. Refer to image of the <sup>13</sup>C NMR spectrum; HRMS (EI): Exact mass calcd for C<sub>46</sub>H<sub>86</sub>N<sub>7</sub>O<sub>10</sub> [M+NH<sub>4</sub>]<sup>+</sup> 896.6436, found 896.6433. MPT-4-037

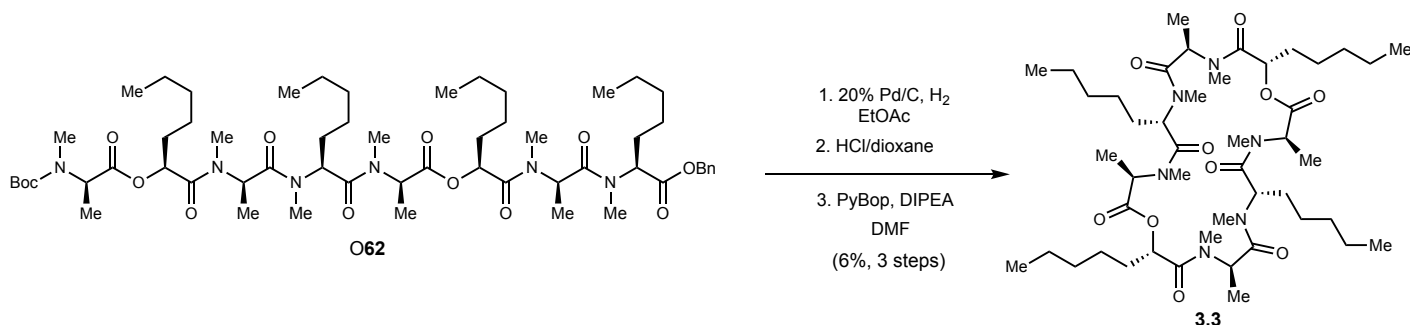

**(3R,6S,9R,12S,15R,18S,21R,24S)-3,4,7,9,10,15,16,19,21,22-decamethyl-6,12,18,24-tetrapentyl-1,13-dioxo-**

**4,7,10,16,19,22-hexaazacyclotetracosan-2,5,8,11,14,17,20,23-octaone (3.3).** A round-bottom flask was charged with the depsipeptide (154 mg, 142 μmol), dissolved in EtOAc (1.4 mL), and treated with 10% Pd/C (30.8 mg). The reaction flask was evacuated with light vacuum. Hydrogen (balloon) was added, and the flask was cycled once more. The reaction was allowed to stir for 1 h. After purging the flask with argon, the crude reaction mixture was filtered through Celite. To the crude material was added 4M HCl/dioxane (1.00 mL) and the reaction mixture was allowed to stir for 30 min. The reaction mixture was concentrated and added to a flame-dried round bottom flask. DMF (28.4 mL) was added and the reaction was cooled to 0 °C. Once at 0 °C, DIPEA (49.5 μL, 284 μmol) and PyBop (70.6 mg, 136 μmol) were added. The reaction was stirred at 0 °C for 1.5 h, then allowed to warm to ambient temperature and stir for an additional 1 h. The reaction mixture was poured into cold 10% aq citric acid and extracted with EtOAc. The combined organic layers were washed with satd aq NaHCO<sub>3</sub>, brine, and then dried and concentrated. Preparative HPLC purification (5 – 95% aqueous acetonitrile, 210 nm, flow rate: 18 mL/min, R<sub>t</sub> = 23.0 m) afforded the 24-membered macrocycle (7.0 mg, 6.1%) as a yellow oil. [ $\alpha$ ]<sub>D</sub><sup>24</sup> - 23 (c 0.22, CHCl<sub>3</sub>); R<sub>f</sub> = 0.44 (50% EtOAc in hexanes); IR (film) 2932, 2871, 1745, 1667, 1456, 1190 cm<sup>-1</sup>; <sup>1</sup>H NMR (600 MHz, CDCl<sub>3</sub>) This compound exists in multiple conformations, causing significant peak overlap. Refer to image of the <sup>1</sup>H NMR spectrum; <sup>13</sup>C NMR (150 MHz, CDCl<sub>3</sub>) This compound exists in multiple conformations, causing significant peak overlap. Refer to image of the <sup>13</sup>C NMR spectrum; HRMS (EI): Exact mass calcd for C<sub>46</sub>H<sub>86</sub>N<sub>7</sub>O<sub>10</sub> [M+NH<sub>4</sub>]<sup>+</sup> 896.6436, found 896.6435. MPT-3-035



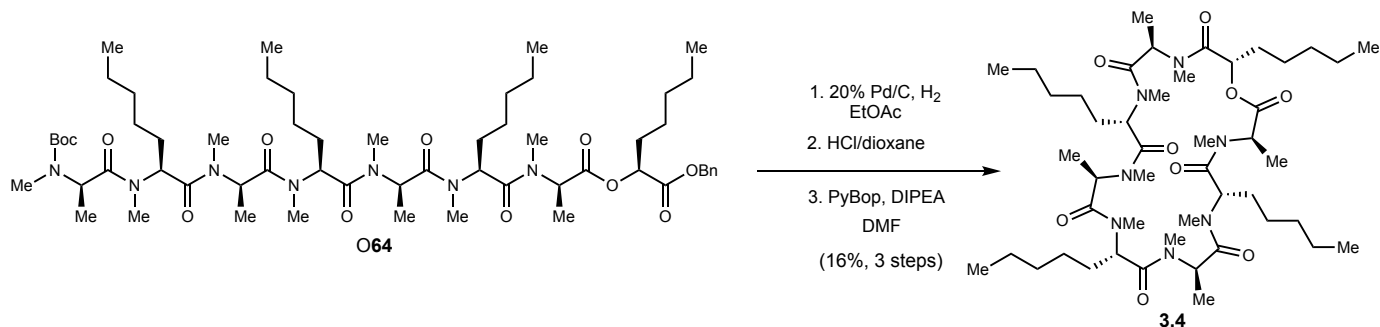

**(3R,6S,9R,12S,15R,18S,21R,24S)-3,4,7,9,10,13,15,16,19,21,22-undecamethyl-6,12,18,24-tetrapentyl-1-oxa-**

**4,7,10,13,16,19,22-heptaazacyclotetracosan-2,5,8,11,14,17,20,23-octaone (3.4).** A round-bottom flask was charged with the depsipeptide (30 mg, 27  $\mu$ mol), dissolved in EtOAc (270  $\mu$ L), and treated with 10% Pd/C (6.0 mg). The reaction flask was evacuated with light vacuum. Hydrogen (balloon) was added, and the flask was cycled once more. The reaction was allowed to stir for 1 h. After purging the flask with argon, the crude reaction mixture was filtered through Celite. To the crude material was added 4M HCl/dioxane (1.00 mL) and the reaction mixture was allowed to stir for 30 min. The reaction mixture was concentrated and added to a flame-dried round bottom flask. DMF (5.4 mL) was added and the reaction was cooled to 0 °C. Once at 0 °C, DIPEA (15  $\mu$ L, 81  $\mu$ mol) and PyBop (15 mg, 28  $\mu$ mol) were added. The reaction was stirred at 0 °C for 1.5 h, and then allowed to warm to ambient temperature to stir for an additional 1 h. The reaction mixture was poured into cold 10% aq citric acid and extracted with EtOAc. The combined organic layers were washed with satd aq NaHCO<sub>3</sub>, brine, and then dried and concentrated. Preparative HPLC purification (5 – 95% aqueous acetonitrile, 210 nm, flow rate: 18 mL/min, R<sub>t</sub> = 23.1 m) afforded the 24-membered macrocycle (2.9 mg, 16%) as a yellow oil.  $[\alpha]_D^{24} + 4.0$  (c 0.11, CHCl<sub>3</sub>); R<sub>f</sub> = 0.40 (60% EtOAc in hexanes); IR (film) 2931, 2860, 1743, 1663, 1456, 1185 cm<sup>-1</sup>; <sup>1</sup>H NMR (600 MHz, CDCl<sub>3</sub>) This compound exists in multiple conformations, causing significant peak overlap. Refer to image of the <sup>1</sup>H NMR spectrum; <sup>13</sup>C NMR (150 MHz, CDCl<sub>3</sub>) This compound exists in multiple conformations, causing significant peak overlap. Refer to image of the <sup>13</sup>C NMR spectrum; HRMS (EI): Exact mass calcd for C<sub>47</sub>H<sub>89</sub>N<sub>8</sub>O<sub>9</sub> [M+NH<sub>4</sub>]<sup>+</sup> 909.6753, found 909.6748. MPT-5-181

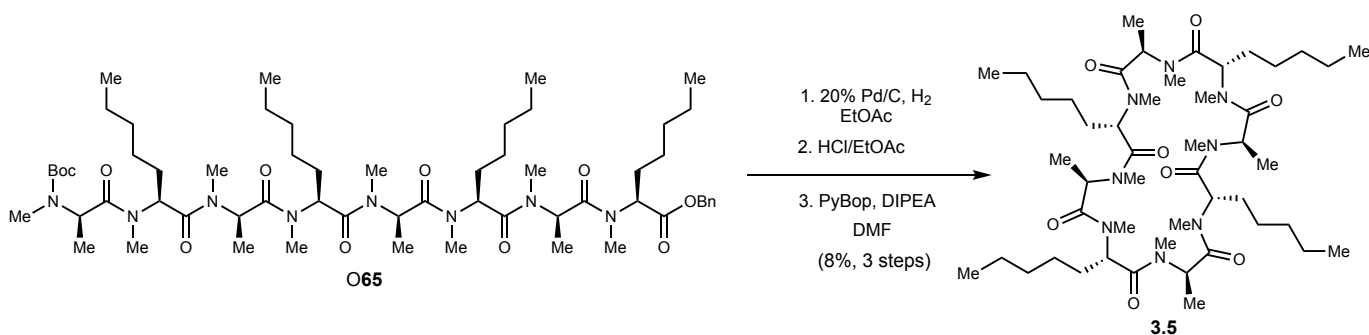

**(3R,6S,9R,12S,15R,18S,21R,24S)-1,3,4,7,9,10,13,15,16,19,21,22-dodecamethyl-6,12,18,24-tetrapentyl-**

**1,4,7,10,13,16,19,22-octaazacyclotetracosan-2,5,8,11,14,17,20,23-octaone (3.5).** A round-bottom flask was charged with the depsipeptide (74.1 mg, 66.6  $\mu$ mol), dissolved in EtOAc (666  $\mu$ L), and treated with 10% Pd/C (14.8 mg). The reaction flask was evacuated with light vacuum. Hydrogen (balloon) was added, and the flask was cycled once more. The reaction was allowed to stir for 1 h. After purging the flask with argon, the crude reaction mixture was filtered through Celite. To

the crude material was added 4M HCl/EtOAc (1.0 mL) and the reaction mixture was allowed to stir for 30 min. The reaction mixture was concentrated and added to a flame-dried round bottom flask. DMF (13.3 mL) was added and the reaction was cooled to 0 °C. Once at 0 °C, DIPEA (26.3  $\mu$ L, 200  $\mu$ mol) and PyBop (36.5 mg, 69.9  $\mu$ mol) were added. The reaction was stirred at 0 °C for 1.5 h, and then allowed to warm to ambient temperature to stir for an additional 1 h. The reaction mixture was poured into cold 10% aq citric acid and extracted with EtOAc. The combined organic layers were washed with satd aq NaHCO<sub>3</sub>, brine, and then dried and concentrated. Preparative HPLC purification (5 – 95% aqueous acetonitrile, 210 nm, flow rate: 18 mL/min,  $R_t$  = 24.7 m) afforded the 24-membered macrocycle (5.5 mg, 8.3%) as a yellow oil.  $[\alpha]_D^{24}$  + 4.9 (*c* 0.21, CHCl<sub>3</sub>);  $R_f$  = 0.31 (40% EtOAc in hexanes); IR (film) 2927, 2855, 1747, 1653, 1457, 1196 cm<sup>-1</sup>; <sup>1</sup>H NMR (600 MHz, CDCl<sub>3</sub>) This compound exists in multiple conformations, causing significant peak overlap. Refer to image of the <sup>1</sup>H NMR spectrum; <sup>13</sup>C NMR (150 MHz, CDCl<sub>3</sub>) This compound exists in multiple conformations, causing significant peak overlap. Refer to image of the <sup>13</sup>C NMR spectrum; HRMS (EI): Exact mass calcd for C<sub>48</sub>H<sub>89</sub>N<sub>8</sub>O<sub>8</sub> [M+H]<sup>+</sup> 905.6803, found 905.6800. MPT-5-242

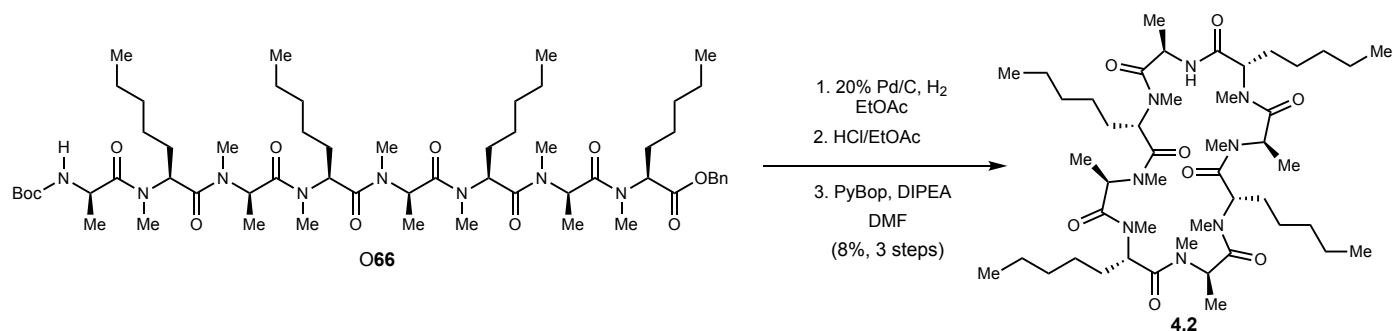

**(3*R*,6*S*,9*R*,12*S*,15*R*,18*S*,21*R*,24*S*)-1,3,4,7,9,10,13,15,16,19,21-undecamethyl-6,12,18,24-tetrapentyl-1,4,7,10,13,16,19,22-octaazacyclotetracosan-2,5,8,11,14,17,20,23-octaone (4.2).** A round-bottom flask was charged with the depsipeptide (116 mg, 110  $\mu$ mol), dissolved in EtOAc (1.1 mL), and treated with 10% Pd/C (23.2 mg). The reaction flask was evacuated with light vacuum. Hydrogen (balloon) was added, and the flask was cycled once more. The reaction was allowed to stir for 1 h. After purging the flask with argon, the crude reaction mixture was filtered through Celite. To the crude material was added 4M HCl/EtOAc (1.00 mL) and the reaction mixture was allowed to stir for 30 min. The reaction mixture was concentrated and added to a flame-dried round bottom flask. Dry DMF (24.0 mL) was added and the reaction was cooled to 0 °C. Once at 0 °C, DIPEA (43.4  $\mu$ L, 330  $\mu$ mol) and PyBop (60.0 mg, 115  $\mu$ mol) were added. The reaction was stirred at 0 °C for 1.5 h, and then allowed to warm to ambient temperature to stir for an additional 1 h. The reaction mixture was poured into cold 10% aq citric acid and extracted with EtOAc. The combined organic layers were washed with satd aq NaHCO<sub>3</sub>, brine, and then dried and concentrated. Preparative HPLC purification (5 – 95% aqueous acetonitrile, 210 nm, flow rate: 18 mL/min,  $R_t$  = 24.1 m) afforded the 24-membered macrocycle (6.0 mg, 7.5%) as a light yellow oil.  $[\alpha]_D^{24}$  – 8.1 (*c* 0.30, CHCl<sub>3</sub>);  $R_f$  = 0.55 (60% EtOAc/EtOAc in hexanes); IR (film) 3380, 2925, 2854, 1744, 1661, 1458, 1202, 1092 cm<sup>-1</sup>; <sup>1</sup>H NMR (600 MHz, CDCl<sub>3</sub>) This compound exists in multiple conformations, causing significant peak overlap. Refer to image of the <sup>1</sup>H NMR spectrum; <sup>13</sup>C NMR (150 MHz, CDCl<sub>3</sub>) This compound exists in multiple conformations, causing significant peak overlap. Refer to image of the <sup>13</sup>C NMR spectrum; HRMS (EI): Exact mass calcd for C<sub>47</sub>H<sub>87</sub>N<sub>8</sub>O<sub>8</sub> [M+H]<sup>+</sup> 891.6641, found 891.6640. MPT-4-224

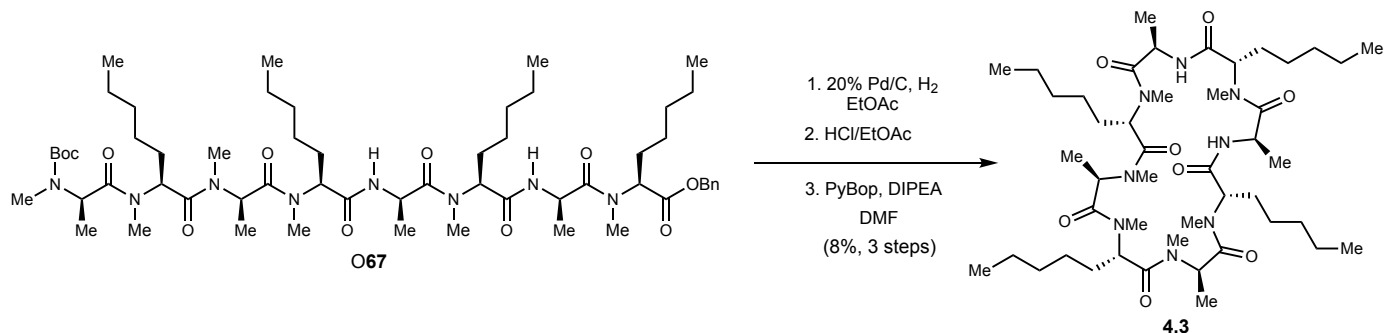

**(3R,6S,9R,12S,15R,18S,21R,24S)-1,3,4,7,9,10,13,15,19,21-decamethyl-6,12,18,24-tetrapentyl-1,4,7,10,13,16,19,22-octazacyclotetracosan-2,5,8,11,14,17,20,23-octaone (4.3).** A round-bottom flask was charged with the depsipeptide (64.0 mg, 59.2  $\mu\text{mol}$ ), dissolved in EtOAc (592  $\mu\text{L}$ ), and treated with 10% Pd/C (12.8 mg). The reaction flask was evacuated with light vacuum. Hydrogen (balloon) was added, and the flask was cycled once more. The reaction was allowed to stir for 1 h. After purging the flask with argon, the crude reaction mixture was filtered through Celite. To the crude material was added 4M HCl/EtOAc (1.00 mL) and the reaction mixture was allowed to stir for 30 min. The reaction mixture was concentrated and added to a flame-dried round bottom flask. Dry DMF (11.9 mL) was added and the reaction was cooled to 0 °C. Once at 0 °C, DIPEA (23.4  $\mu\text{L}$ , 178  $\mu\text{mol}$ ) and PyBop (32.4 mg, 62.2  $\mu\text{mol}$ ) were added. The reaction was stirred at 0 °C for 0.5 h, and then allowed to warm to ambient temperature to stir for an additional 2.5 h. The reaction mixture was poured into cold 10% aq citric acid and extracted with EtOAc. The combined organic layers were washed with satd aq NaHCO<sub>3</sub>, brine, and then dried and concentrated. Preparative HPLC purification (5 – 95% aqueous acetonitrile, 210 nm, flow rate: 18 mL/min, R<sub>t</sub> = 22.9 m) afforded the 24-membered macrocycle (4.2 mg, 8.1%) as a light yellow oil.  $[\alpha]_D^{24}$  – 3.7 (c 0.16, CHCl<sub>3</sub>); R<sub>f</sub> = 0.50 (60% EtOAc in hexanes); IR (film) 3319, 2926, 2857, 1745, 1692, 1456, 1155, 1028 cm<sup>-1</sup>; <sup>1</sup>H NMR (600 MHz, CDCl<sub>3</sub>) This compound exists in multiple conformations, causing significant peak overlap. Refer to image of the <sup>1</sup>H NMR spectrum; <sup>13</sup>C NMR (150 MHz, CDCl<sub>3</sub>) This compound exists in multiple conformations, causing significant peak overlap. Refer to image of the <sup>13</sup>C NMR spectrum; HRMS (EI): Exact mass calcd for C<sub>46</sub>H<sub>85</sub>N<sub>8</sub>O<sub>8</sub> [M+H]<sup>+</sup> 877.6490, found 877.6486. MPT-4-251

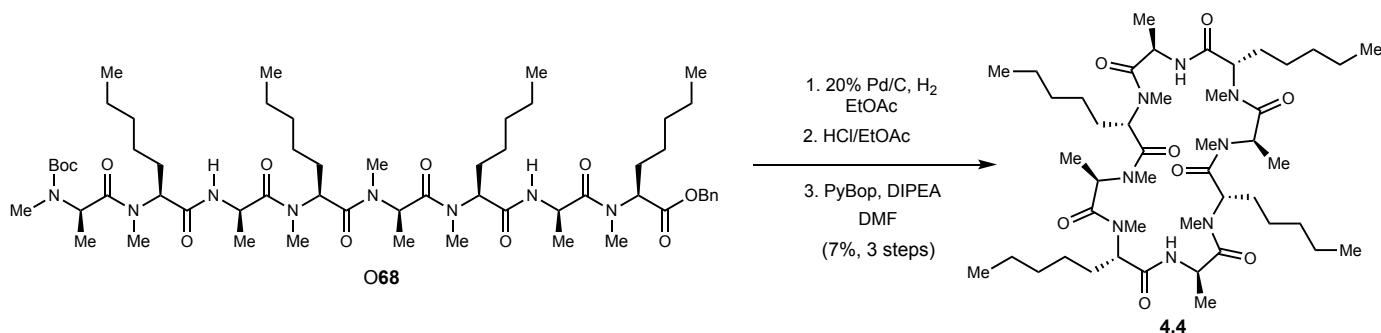

**(3R,6S,9R,12S,15R,18S,21R,24S)-1,3,4,7,9,10,13,15,19,21-decamethyl-6,12,18,24-tetrapentyl-1,4,7,10,13,16,19,22-octazacyclotetracosan-2,5,8,11,14,17,20,23-octaone (4.4).** A round-bottom flask was charged with the depsipeptide (102 mg, 94.0  $\mu\text{mol}$ ), dissolved in EtOAc (940  $\mu\text{L}$ ), and treated with 10% Pd/C (18.8 mg). The reaction flask was evacuated with light vacuum. Hydrogen (balloon) was added, and the flask was cycled once more. The reaction was allowed to stir

for 1 h. After purging the flask with argon, the crude reaction mixture was filtered through Celite. To the crude material was added 4M HCl/EtOAc (1.00 mL) and the reaction mixture was allowed to stir for 30 min. The reaction mixture was concentrated and added to a flame-dried round bottom flask. Dry DMF (19.0 mL) was added and the reaction was cooled to 0 °C. Once at 0 °C, DIPEA (37.3 μL, 282 μmol) and PyBop (51.6 mg, 99.1 μmol) were added. The reaction was stirred at 0 °C for 0.5 h, and then allowed to warm to ambient temperature to stir for an additional 2.5 h. The reaction mixture was poured into cold 10% aq citric acid and extracted with EtOAc. The combined organic layers were washed with satd aq NaHCO<sub>3</sub>, brine, and then dried and concentrated. Preparative HPLC purification (5 – 95% aqueous acetonitrile, 210 nm, flow rate: 18 mL/min, R<sub>t</sub> = 23.2 m) afforded the 24-membered macrocycle (5.3 mg, 6.6%) as a light yellow oil.  $[\alpha]_D^{24}$  - 3.2 (c 0.13, CHCl<sub>3</sub>); R<sub>f</sub> = 0.34 (60% EtOAc in hexanes); IR (film) 3287, 2922, 2860, 1744, 1649, 1555, 1456, 1210 cm<sup>-1</sup>; <sup>1</sup>H NMR (600 MHz, CDCl<sub>3</sub>) This compound exists in multiple conformations, causing significant peak overlap. Refer to image of the <sup>1</sup>H NMR spectrum; <sup>13</sup>C NMR (150 MHz, CDCl<sub>3</sub>) This compound exists in multiple conformations, causing significant peak overlap. Refer to image of the <sup>13</sup>C NMR spectrum; HRMS (EI): Exact mass calcd for C<sub>46</sub>H<sub>88</sub>N<sub>9</sub>O<sub>8</sub> [M+NH<sub>4</sub>]<sup>+</sup> 894.6756, found 894.6753. MPT-3-103

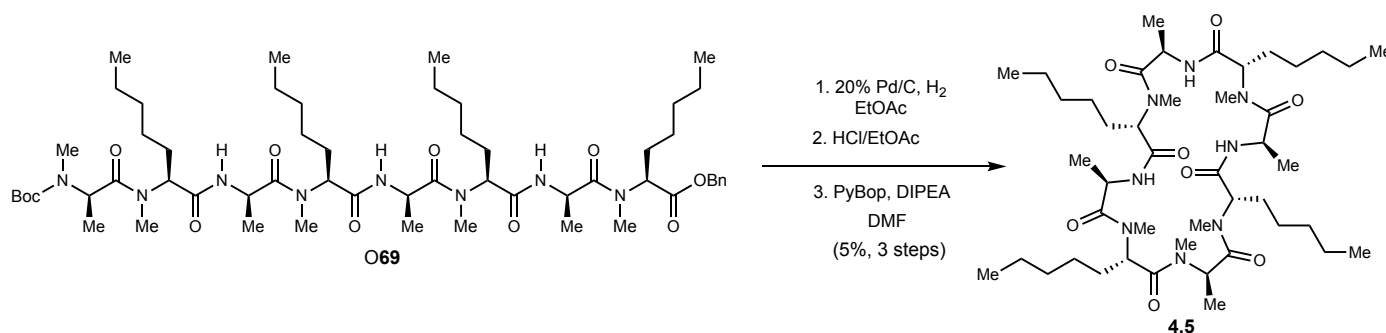

**(3R,6S,9R,12S,15R,18S,21R,24S)-1,3,4,7,9,13,15,19,21-nonamethyl-6,12,18,24-tetrapentyl-1,4,7,10,13,16,19,22-octaazacyclotetracosan-2,5,8,11,14,17,20,23-octaone (4.5).** A round-bottom flask was charged with the depsipeptide (76 mg, 71.0 μmol), dissolved in EtOAc (710 μL), and treated with 10% Pd/C (15.2 mg). The reaction flask was evacuated with light vacuum. Hydrogen (balloon) was added, and the flask was cycled once more. The reaction was allowed to stir for 1 h. After purging the flask with argon, the crude reaction mixture was filtered through Celite. To the crude material was added 4M HCl/dioxane (1.00 mL) and the reaction mixture was allowed to stir for 30 min. The reaction mixture was concentrated and added to a flame-dried round bottom flask. Dry DMF (14.2 mL) was added and the reaction was cooled to 0 °C. Once at 0 °C, DIPEA (9.34 μL, 215 μmol) and PyBop (13.0 mg, 74.6 μmol) were added. The reaction was stirred at 0 °C for 1.5 h, and then allowed to warm to ambient temperature to stir for an additional 1 h. The reaction mixture was poured into cold 10% aq citric acid and extracted with EtOAc. The combined organic layers were washed with satd aq NaHCO<sub>3</sub>, brine, and then dried and concentrated. Preparative HPLC purification (5 – 95% aqueous acetonitrile, 210 nm, flow rate: 18 mL/min, R<sub>t</sub> = 23.0 m) afforded the 24-membered macrocycle (3.0 mg, 4.9%) as a light yellow oil.  $[\alpha]_D^{24}$  - 7.2 (c 0.14, CHCl<sub>3</sub>); R<sub>f</sub> = 0.18 (60% EtOAc in hexanes); IR (film) 3340, 2934, 2861, 1747, 1666, 1456, 1391, 1084 cm<sup>-1</sup>; <sup>1</sup>H NMR (600 MHz, CDCl<sub>3</sub>) This compound exists in multiple conformations, causing significant peak overlap. Refer to image of the <sup>1</sup>H NMR spectrum; <sup>13</sup>C NMR (150 MHz, CDCl<sub>3</sub>) This compound exists in multiple conformations, causing significant peak overlap. Refer to image of the <sup>13</sup>C NMR spectrum; HRMS (EI): Exact mass calcd for C<sub>45</sub>H<sub>86</sub>N<sub>9</sub>O<sub>8</sub> [M+NH<sub>4</sub>]<sup>+</sup> 880.6599, found 880.6603. MPT-5-254

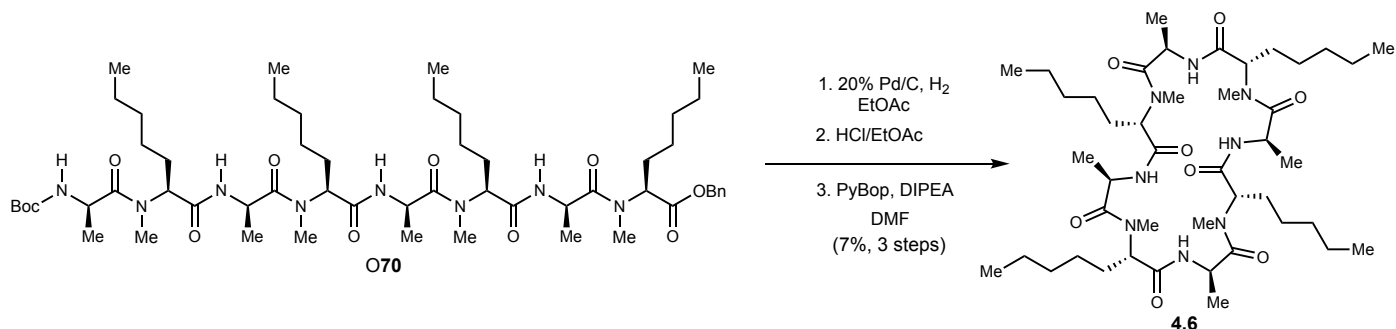

**(3R,6S,9R,12S,15R,18S,21R,24S)-1,3,7,9,13,15,19,21-octamethyl-6,12,18,24-tetrapentyl-1,4,7,10,13,16,19,22-octaazacyclotetracosan-2,5,8,11,14,17,20,23-octaone (4.6).** A round-bottom flask was charged with the depsipeptide (136 mg, 128  $\mu$ mol), dissolved in EtOAc (1.3 mL), and treated with 10% Pd/C (27.2 mg). The reaction flask was evacuated with light vacuum. Hydrogen (balloon) was added, and the flask was cycled once more. The reaction was allowed to stir for 1 h. After purging the flask with argon, the crude reaction mixture was filtered through Celite. To the crude material was added 4M HCl/EtOAc (1.00 mL) and the reaction mixture was allowed to stir for 30 min. The reaction mixture was concentrated and added to a flame-dried round bottom flask. DMF (25.7 mL) was added and the reaction was cooled to 0 °C. Once at 0 °C, DIPEA (50.5  $\mu$ L, 384  $\mu$ mol) and PyBop (69.8 mg, 134  $\mu$ mol) were added. The reaction was stirred at 0 °C for 0.5 h, then allowed to warm to ambient temperature and stir for an additional 2.5 h. The reaction mixture was poured into cold 10% aq citric acid and extracted with EtOAc. The combined organic layers were washed with satd aq NaHCO<sub>3</sub>, brine, and then dried and concentrated. Preparative HPLC purification (5 – 95% aqueous acetonitrile, 210 nm, flow rate: 18 mL/min, R<sub>t</sub> = 23.1 min) afforded the 24-membered macrocycle (7.6 mg, 7.0%) as a light yellow oil.  $[\alpha]_D^{24}$  – 9.9 (c 0.23, CHCl<sub>3</sub>); R<sub>f</sub> = 0.48 (60% EtOAc in hexanes); IR (film) 3443, 2821, 2851, 1741, 1650, 1260, 1019 cm<sup>-1</sup>; <sup>1</sup>H NMR (600 MHz, CDCl<sub>3</sub>) This compound exists in multiple conformations, causing significant peak overlap. Refer to image of the <sup>1</sup>H NMR spectrum; <sup>13</sup>C NMR (150 MHz, CDCl<sub>3</sub>) This compound exists in multiple conformations, causing significant peak overlap. Refer to image of the <sup>13</sup>C NMR spectrum; HRMS (EI): Exact mass calcd for C<sub>44</sub>H<sub>81</sub>N<sub>8</sub>O<sub>8</sub> [M+H]<sup>+</sup> 849.6177, found 849.6176. MPT-4-081

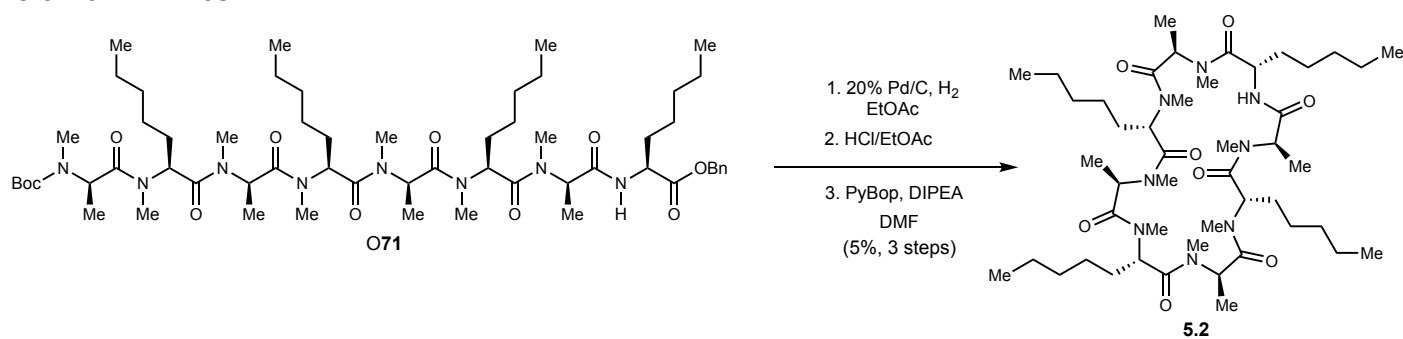

**(3S,6R,9S,12R,15S,18R,21S,24R)-1,4,6,7,10,12,13,16,18,19,24-undecamethyl-3,9,15,21-tetrapentyl-1,4,7,10,13,16,19,22-octaazacyclotetracosan-2,5,8,11,14,17,20,23-octaone (5.2).** A round-bottom flask was charged with the depsipeptide (95.9 mg, 86.9  $\mu$ mol), dissolved in EtOAc (869  $\mu$ L), and treated with 10% Pd/C (19.2 mg). The reaction flask was evacuated with light vacuum. Hydrogen (balloon) was added, and the flask was cycled once more. The reaction was allowed to stir for 1 h. After purging the flask with argon, the crude reaction mixture was filtered through Celite. To the crude material was added 4M HCl/EtOAc (1.0 mL) and the reaction mixture was allowed to stir for 30 min. The reaction

mixture was concentrated and added to a flame-dried round bottom flask. DMF (17.4 mL) was added and the reaction was cooled to 0 °C. Once at 0 °C, DIPEA (34.3  $\mu$ L, 261  $\mu$ mol) and PyBop (47.5 mg, 91.2  $\mu$ mol) were added. The reaction was stirred at 0 °C for 0.5 h, and then allowed to warm to ambient temperature to stir for an additional 2.5 h. The reaction mixture was poured into cold 10% aq citric acid and extracted with EtOAc. The combined organic layers were washed with satd aq NaHCO<sub>3</sub>, brine, and then dried and concentrated. Preparative HPLC purification (5 – 95% aqueous acetonitrile, 210 nm, flow rate: 18 mL/min, R<sub>t</sub> = 24.2 m) afforded the 24-membered macrocycle (4.1 mg, 5.3%) as a yellow oil.  $[\alpha]_D^{24}$  - 5.1 (c 0.12, CHCl<sub>3</sub>); R<sub>f</sub> = 0.61 (60% EtOAc in hexanes); IR (film) 3478, 2922, 2851, 1740, 1633, 1455, 1260 cm<sup>-1</sup>; <sup>1</sup>H NMR (600 MHz, CDCl<sub>3</sub>) This compound exists in multiple conformations, causing significant peak overlap. Refer to image of the <sup>1</sup>H NMR spectrum; <sup>13</sup>C NMR (150 MHz, CDCl<sub>3</sub>) This compound exists in multiple conformations, causing significant peak overlap. Refer to image of the <sup>13</sup>C NMR spectrum; HRMS (EI): Exact mass calcd for C<sub>47</sub>H<sub>87</sub>N<sub>8</sub>O<sub>8</sub> [M+H]<sup>+</sup> 891.6647, found 891.6643. MPT-4-184

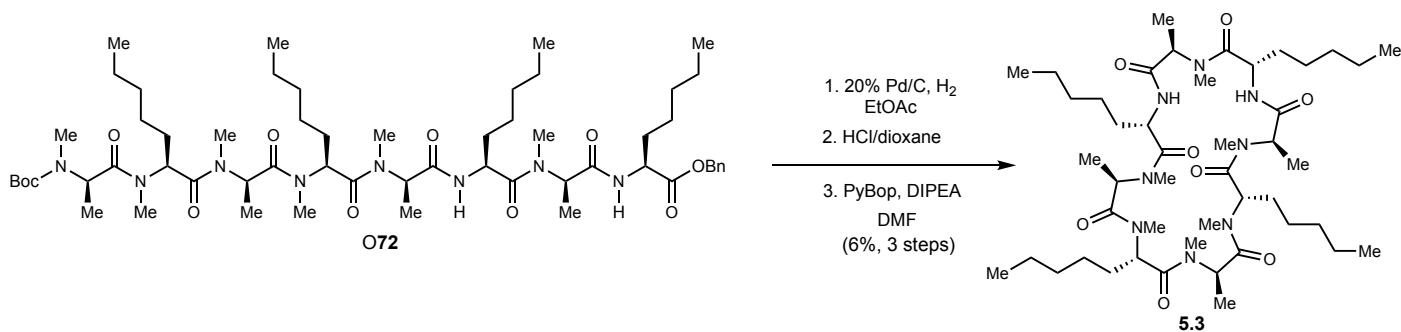

**(3S,6R,9S,12R,15S,18R,21S,24R)-1,4,6,7,10,12,13,18,19,24-decamethyl-3,9,15,21-tetrapentyl-1,4,7,10,13,16,19,22-octazacyclotetracosan-2,5,8,11,14,17,20,23-octaone (5.3).** A round-bottom flask was charged with the depsipeptide (90.2 mg, 83.2  $\mu$ mol), dissolved in EtOAc (832  $\mu$ L), and treated with 10% Pd/C (18.0 mg). The reaction flask was evacuated with light vacuum. Hydrogen (balloon) was added, and the flask was cycled once more. The reaction was allowed to stir for 1 h. After purging the flask with argon, the crude reaction mixture was filtered through Celite. To the crude material was added 4M HCl/dioxane (1.00 mL) and the reaction mixture was allowed to stir for 30 min. The reaction mixture was concentrated and added to a flame-dried round bottom flask. DMF (16.7 mL) was added and the reaction was cooled to 0 °C. Once at 0 °C, DIPEA (32.8  $\mu$ L, 250  $\mu$ mol) and PyBop (44.9 mg, 87.4  $\mu$ mol) were added. The reaction was stirred at 0 °C for 0.5 h, and then allowed to warm to ambient temperature to stir for an additional 2.5 h. The reaction mixture was poured into cold 10% aq citric acid and extracted with EtOAc. The combined organic layers were washed with satd aq NaHCO<sub>3</sub>, brine, and then dried and concentrated. Preparative HPLC purification (5 – 95% aqueous acetonitrile, 210 nm, flow rate: 18 mL/min, R<sub>t</sub> = 22.9 m) afforded the 24-membered macrocycle (4.3 mg, 5.9%) as a light yellow oil.  $[\alpha]_D^{24}$  - 3.3 (c 0.19, CHCl<sub>3</sub>); R<sub>f</sub> = 0.55 (60% EtOAc in hexanes); IR (film) 3284, 2929, 2860, 1744, 1649, 1554, 1210, 1066 cm<sup>-1</sup>; <sup>1</sup>H NMR (600 MHz, CDCl<sub>3</sub>) This compound exists in multiple conformations, causing significant peak overlap. Refer to image of the <sup>1</sup>H NMR spectrum; <sup>13</sup>C NMR (150 MHz, CDCl<sub>3</sub>) This compound exists in multiple conformations, causing significant peak overlap. Refer to image of the <sup>13</sup>C NMR spectrum; HRMS (EI): Exact mass calcd for C<sub>46</sub>H<sub>85</sub>N<sub>8</sub>O<sub>8</sub> [M+H]<sup>+</sup> 877.6490, found 877.6489. MPT-5-149

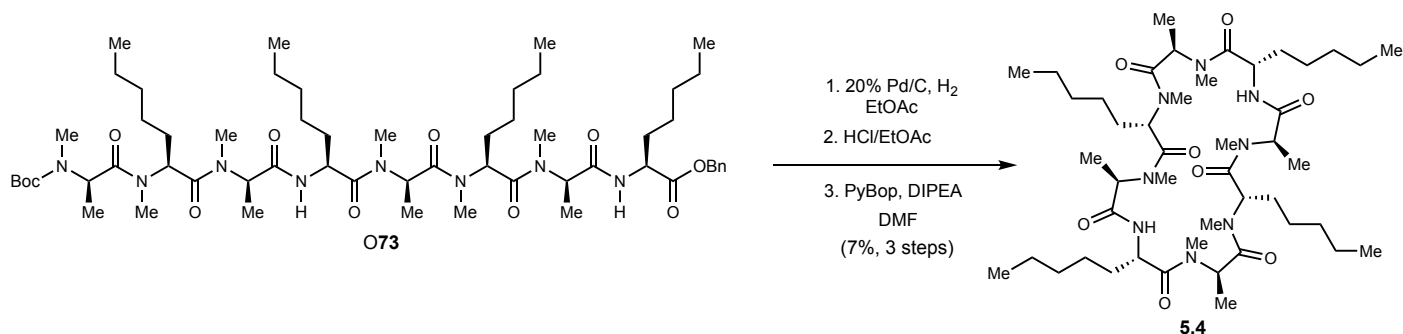

**(3S,6R,9S,12R,15S,18R,21S,24R)-1,4,6,7,12,13,16,18,19,24-decamethyl-3,9,15,21-tetrapentyl-1,4,7,10,13,16,19,22-octaazacyclotetracosan-2,5,8,11,14,17,20,23-octaone (5.4).** A round-bottom flask was charged with the depsipeptide (66.9 mg, 61.7  $\mu\text{mol}$ ), dissolved in EtOAc (617  $\mu\text{L}$ ), and treated with 10% Pd/C (13.4 mg). The reaction flask was evacuated with light vacuum. Hydrogen (balloon) was added, and the flask was cycled once more. The reaction was allowed to stir for 1 h. After purging the flask with argon, the crude reaction mixture was filtered through Celite. To the crude material was added 4M HCl/EtOAc (1.00 mL) and the reaction mixture was allowed to stir for 30 min. The reaction mixture was concentrated and added to a flame-dried round bottom flask. Dry DMF (12.4 mL) was added and the reaction was cooled to 0 °C. Once at 0 °C, DIPEA (24.3  $\mu\text{L}$ , 185  $\mu\text{mol}$ ) and PyBop (33.4 mg, 64.5  $\mu\text{mol}$ ) were added. The reaction was stirred at 0 °C for 0.5 h, then allowed to warm to ambient temperature and stir for an additional 2.5 h. The reaction mixture was poured into cold 10% aq citric acid and extracted with EtOAc. The combined organic layers were washed with satd aq NaHCO<sub>3</sub>, brine, and then dried and concentrated. Preparative HPLC purification (5 – 95% aqueous acetonitrile, 210 nm, flow rate: 18 mL/min, R<sub>t</sub> = 23.1 m) afforded the 24-membered macrocycle (3.9 mg, 7.2%) as a light yellow oil.  $[\alpha]_D^{24}$  - 4.2 (c 0.11, CHCl<sub>3</sub>); R<sub>f</sub> = 0.37 (60% EtOAc in hexanes); IR (film) 3419, 2923, 2852, 1747, 1653, 1541, 1260, 1100 cm<sup>-1</sup>; <sup>1</sup>H NMR (600 MHz, CDCl<sub>3</sub>) This compound exists in multiple conformations, causing significant peak overlap. Refer to image of the <sup>1</sup>H NMR spectrum; <sup>13</sup>C NMR (150 MHz, CDCl<sub>3</sub>); HRMS (EI): Exact mass calcd for C<sub>46</sub>H<sub>85</sub>N<sub>8</sub>O<sub>8</sub> [M+H]<sup>+</sup> 877.6490, found 877.6486. MPT-5-212

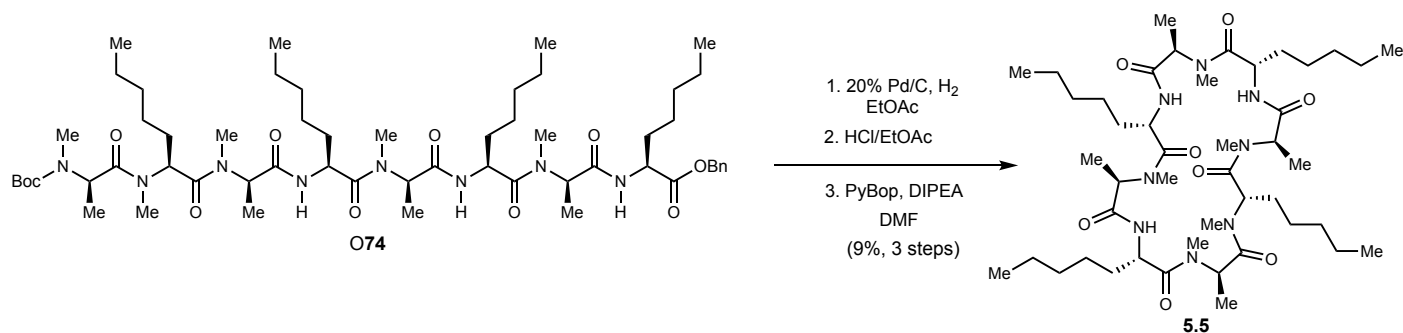

**(3S,6R,9S,12R,15S,18R,21S,24R)-1,4,6,7,12,13,18,19,24-nonamethyl-3,9,15,21-tetrapentyl-1,4,7,10,13,16,19,22-octaazacyclotetracosan-2,5,8,11,14,17,20,23-octaone (5.5).** A round-bottom flask was charged with the depsipeptide (98 mg, 91.5  $\mu\text{mol}$ ), dissolved in EtOAc (915  $\mu\text{L}$ ), and treated with 10% Pd/C (19.6 mg). The reaction flask was evacuated with

light vacuum. Hydrogen (balloon) was added, and the flask was cycled once more. The reaction was allowed to stir for 1 h. After purging the flask with argon, the crude reaction mixture was filtered through Celite. To the crude material was added 4M HCl/EtOAc (1.0 mL) and the reaction mixture was allowed to stir for 30 min. The reaction mixture was concentrated and added to a flame-dried round bottom flask. Dry DMF (21.4 mL) was added and the reaction was cooled to 0 °C. Once at 0 °C, DIPEA (36.1 μL, 275 μmol) and PyBop (50.0 mg, 96.1 μmol) were added. The reaction was stirred at 0 °C for 0.5 h, and then allowed to warm to ambient temperature to stir for an additional 2.5 h. The reaction mixture was poured into cold 10% aq citric acid and extracted with EtOAc. The combined organic layers were washed with satd aq NaHCO<sub>3</sub>, brine, and then dried and concentrated. Preparative HPLC purification (5 – 95% aqueous acetonitrile, 210 nm, flow rate: 18 mL/min, R<sub>t</sub> = 23.9 m) afforded the 24-membered macrocycle (6.1 mg, 9.0%) as a light yellow oil.  $[\alpha]_D^{24}$  - 2.1 (c 0.12, CHCl<sub>3</sub>); R<sub>f</sub> = 0.43 (60% EtOAc in hexanes); IR (film) 3292, 2929, 2843, 1654, 1637, 1560, 1458 cm<sup>-1</sup>; <sup>1</sup>H NMR (600 MHz, CDCl<sub>3</sub>) This compound exists in multiple conformations, causing significant peak overlap. Refer to image of the <sup>1</sup>H NMR spectrum; <sup>13</sup>C NMR (150 MHz, CDCl<sub>3</sub>) This compound exists in multiple conformations, causing significant peak overlap. Refer to image of the <sup>13</sup>C NMR spectrum; HRMS (EI): Exact mass calcd for C<sub>45</sub>H<sub>83</sub>N<sub>8</sub>O<sub>8</sub> [M+H]<sup>+</sup> 863.6328, found 863.6325. MPT-4-227





Figure S2.  $^{13}\text{C}$  NMR (150 MHz,  $\text{CDCl}_3$ ) of **14**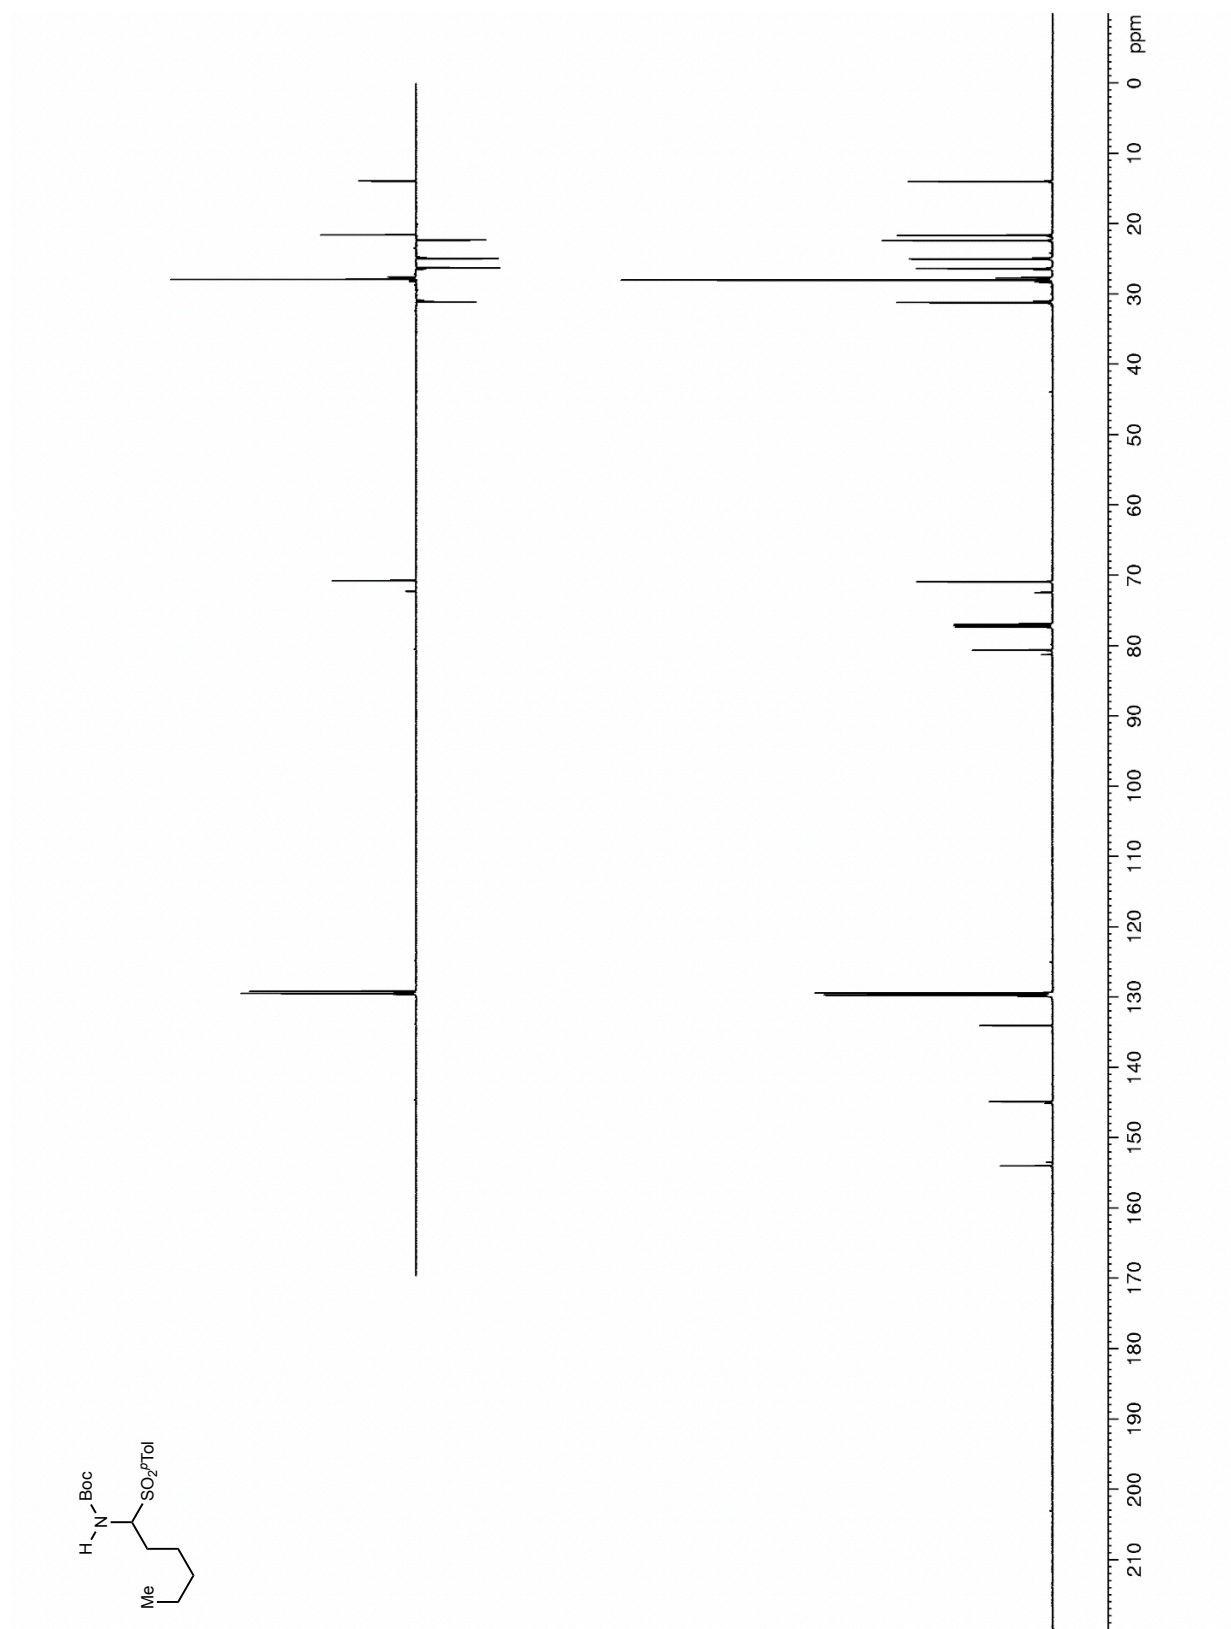

Figure S3.  $^1\text{H}$  NMR (600 MHz,  $\text{CDCl}_3$ ) of **16**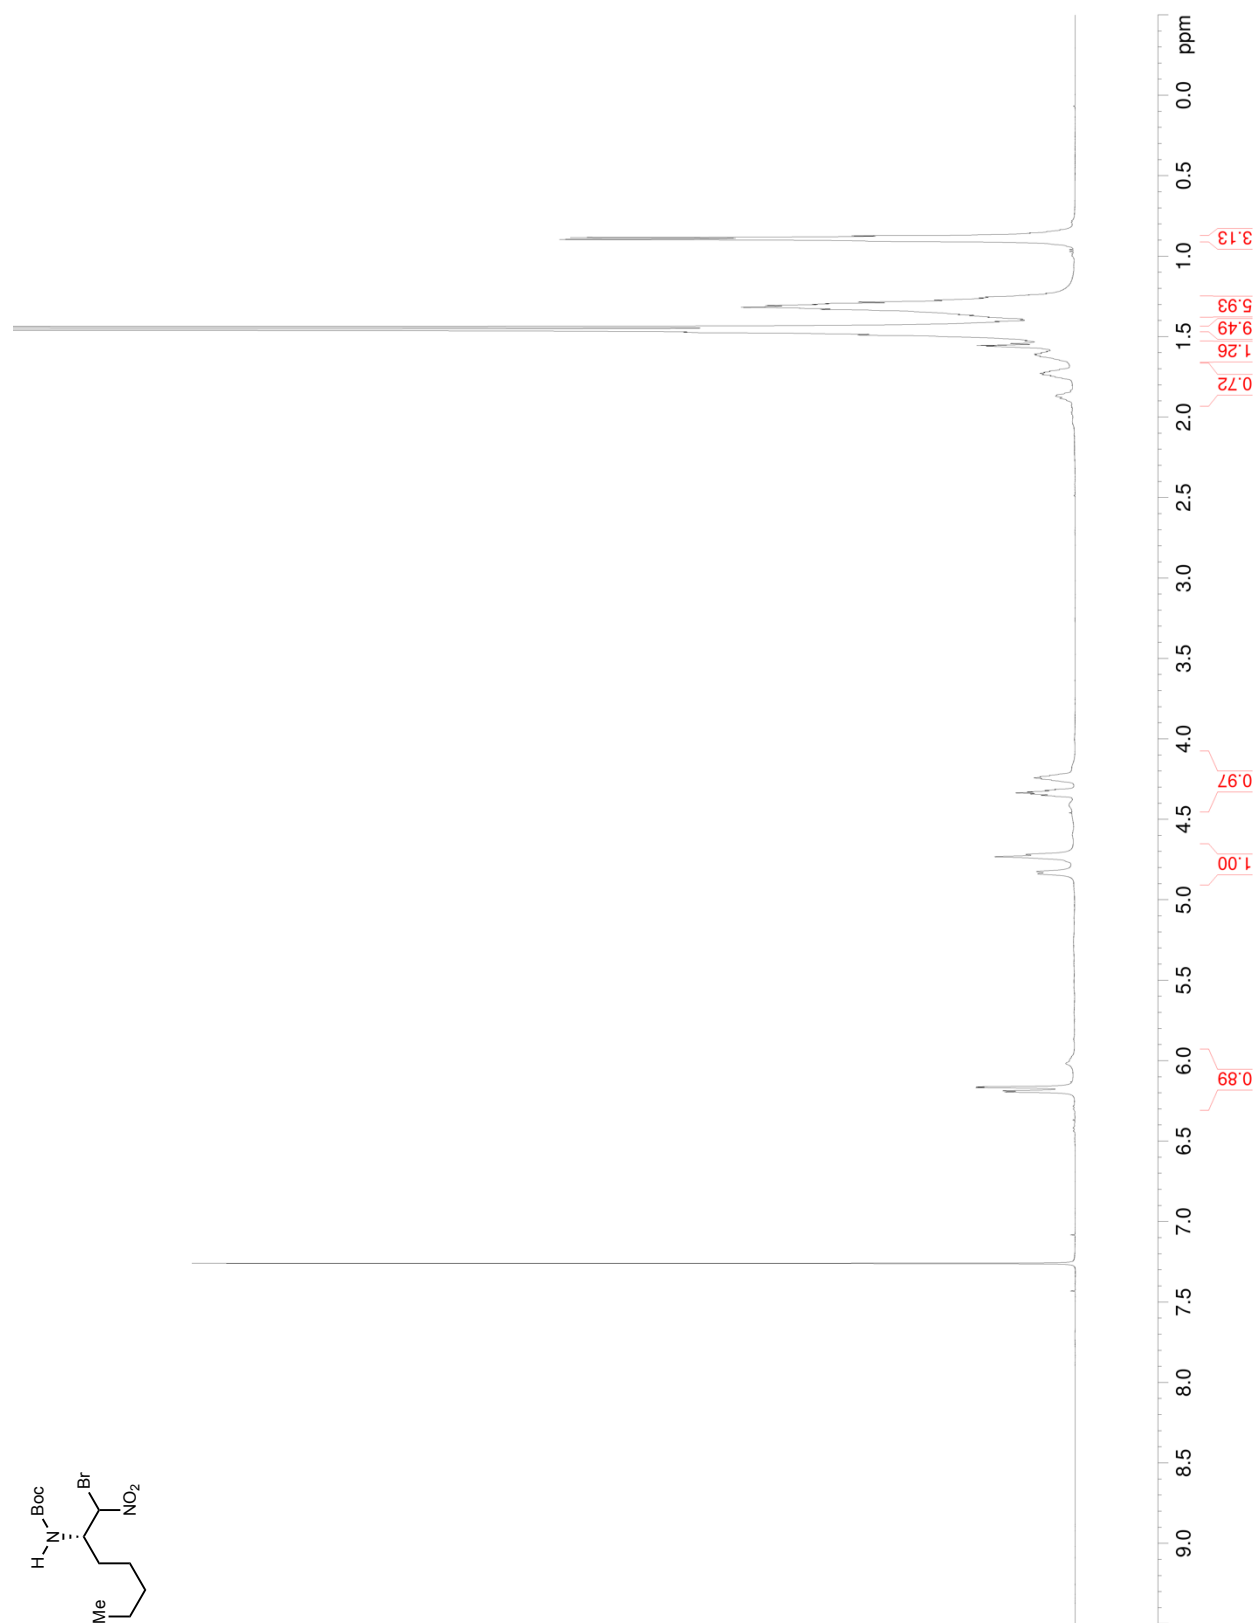

**Figure S4.**  $^{13}\text{C}$  NMR (150 MHz,  $\text{CDCl}_3$ ) of **16**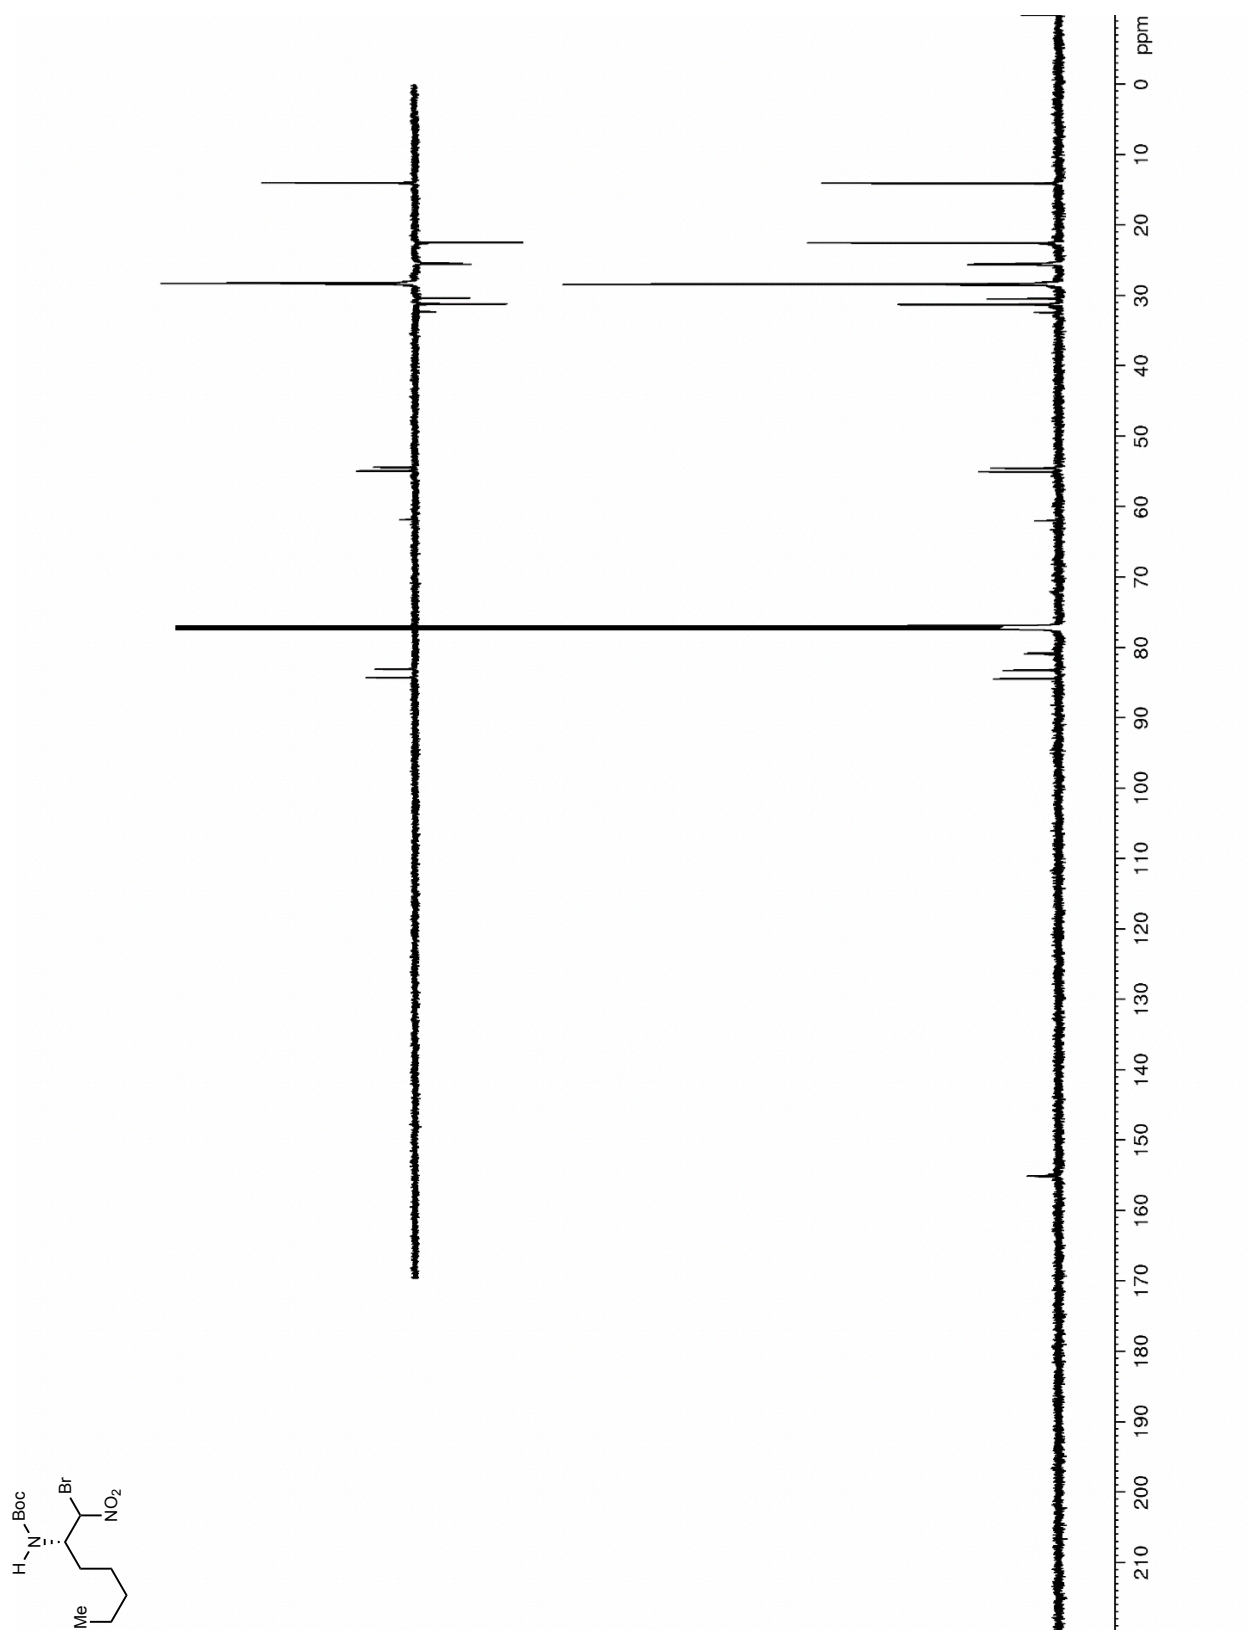

Figure S5.  $^1\text{H}$  NMR (600 MHz,  $\text{CDCl}_3$ ) of **19**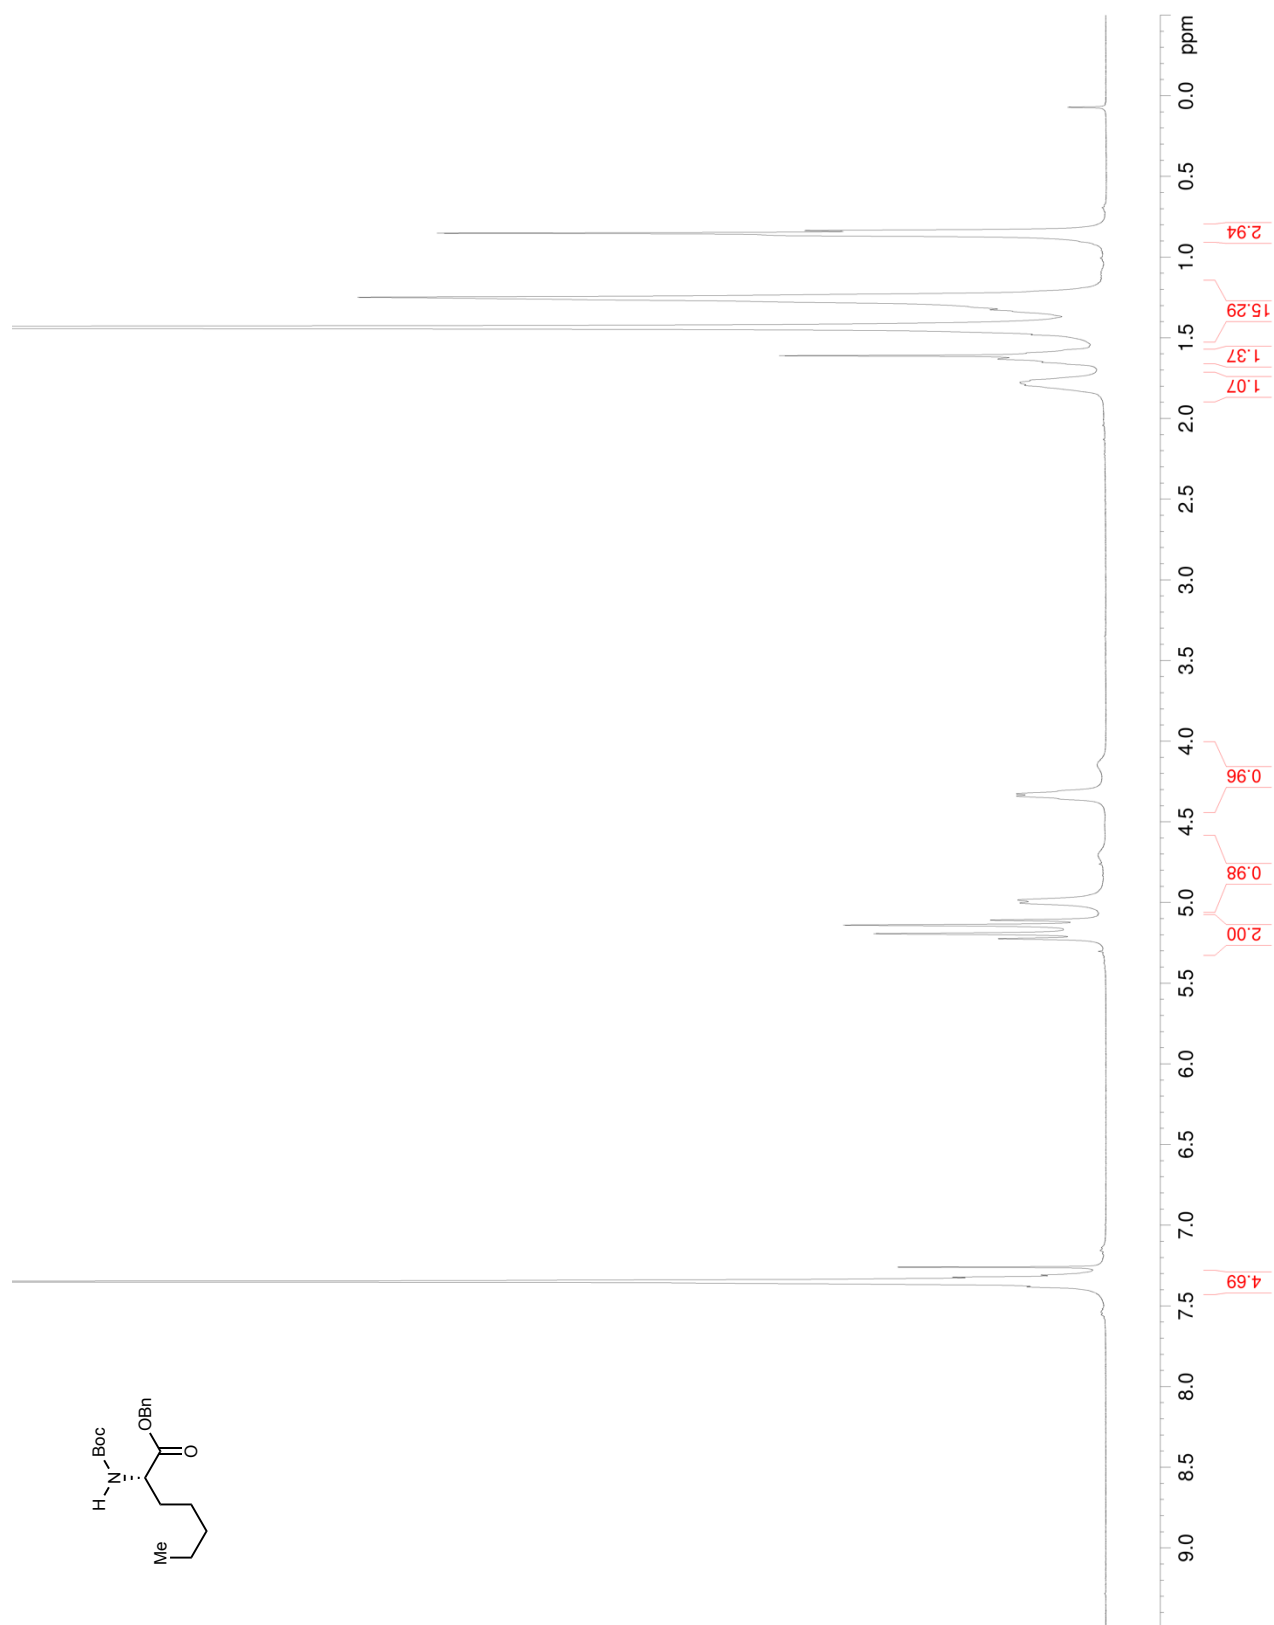

Figure S6.  $^{13}\text{C}$  NMR (150 MHz,  $\text{CDCl}_3$ ) of **19**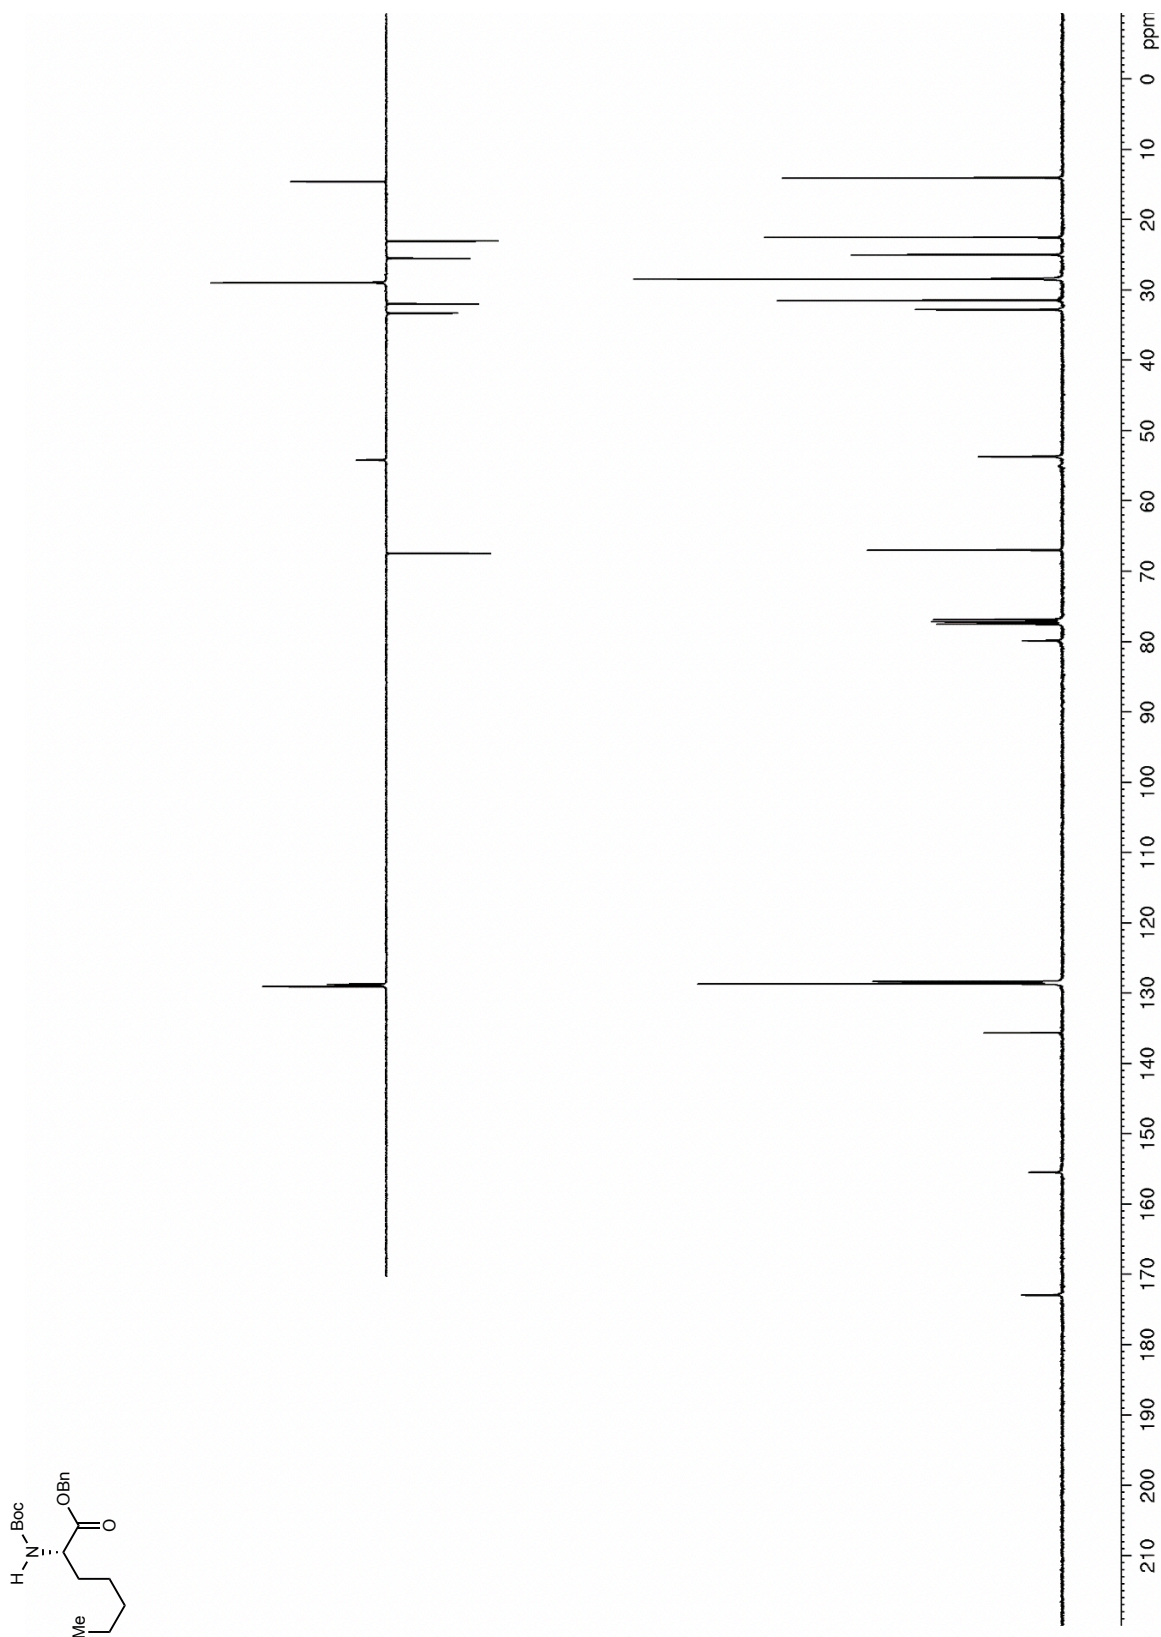

Figure S7.  $^1\text{H}$  NMR (600 MHz,  $\text{CDCl}_3$ ) of **21**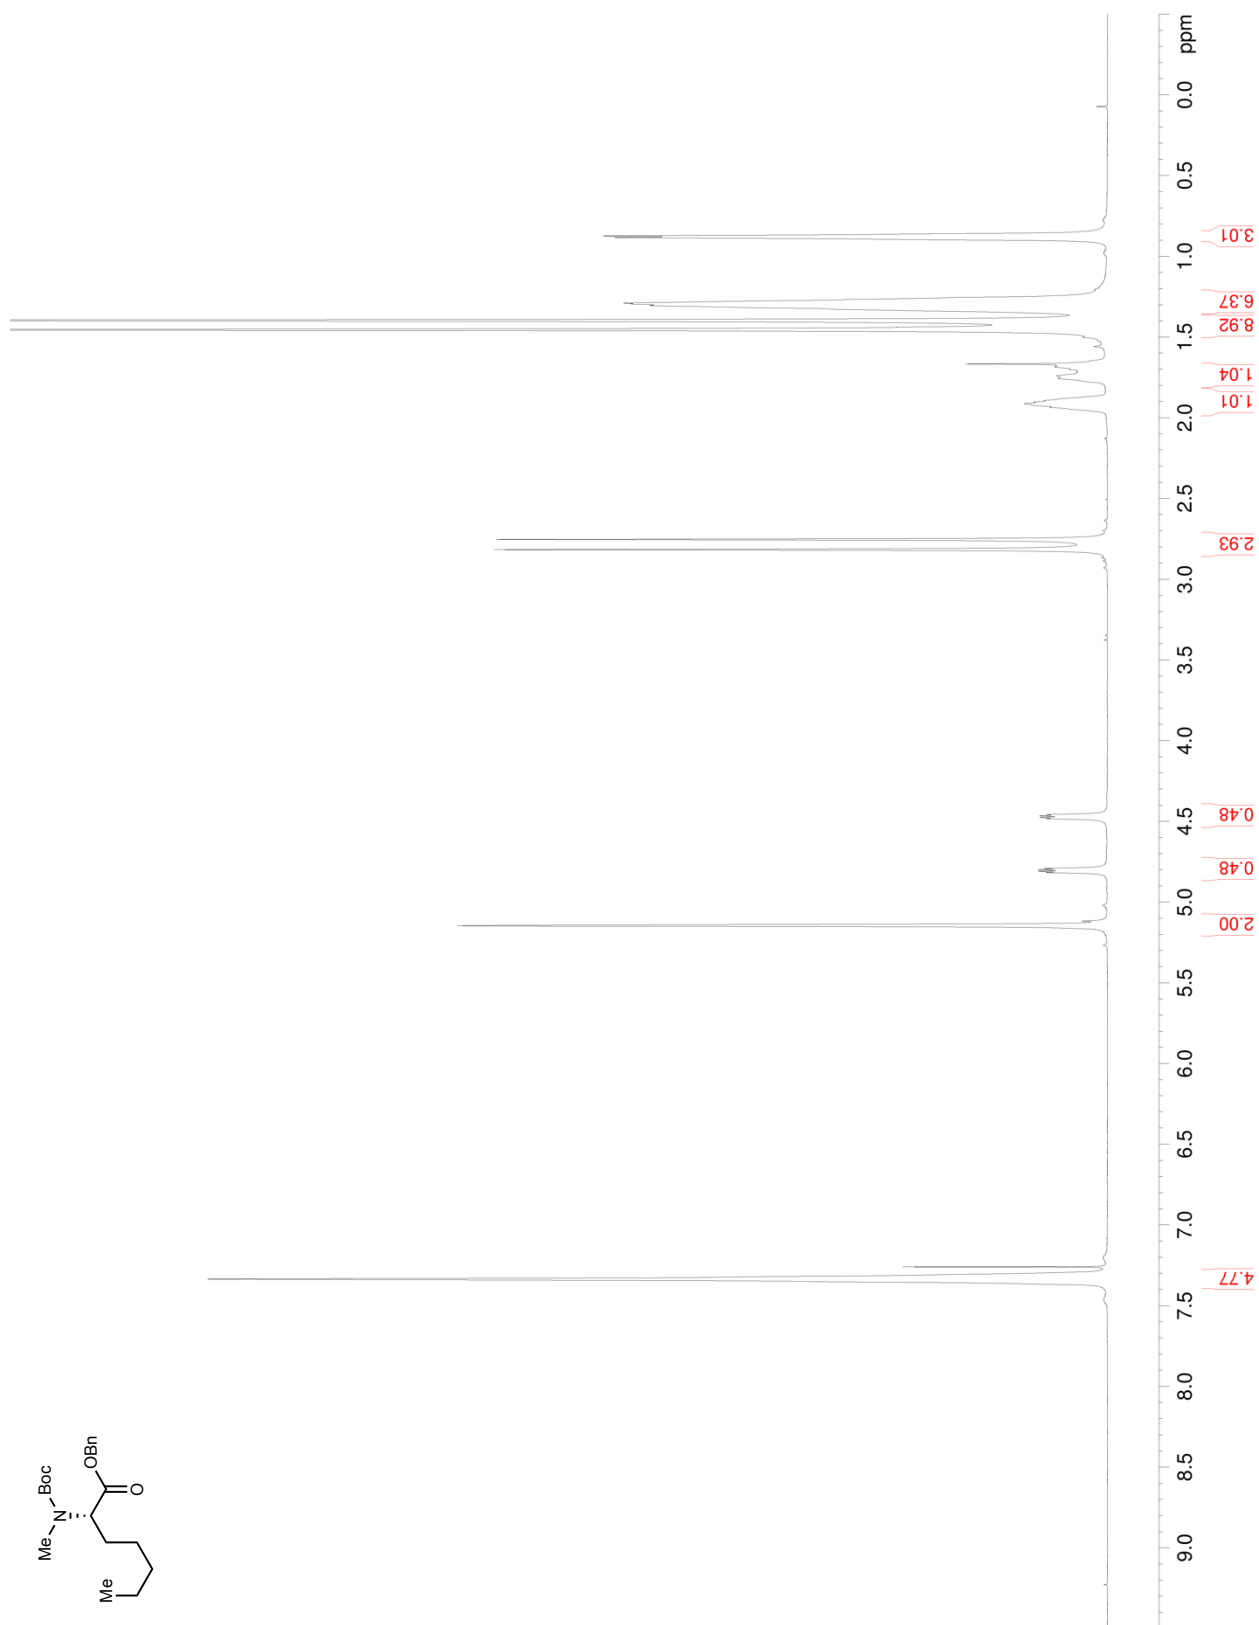

Figure S8.  $^{13}\text{C}$  NMR (150 MHz,  $\text{CDCl}_3$ ) of **21**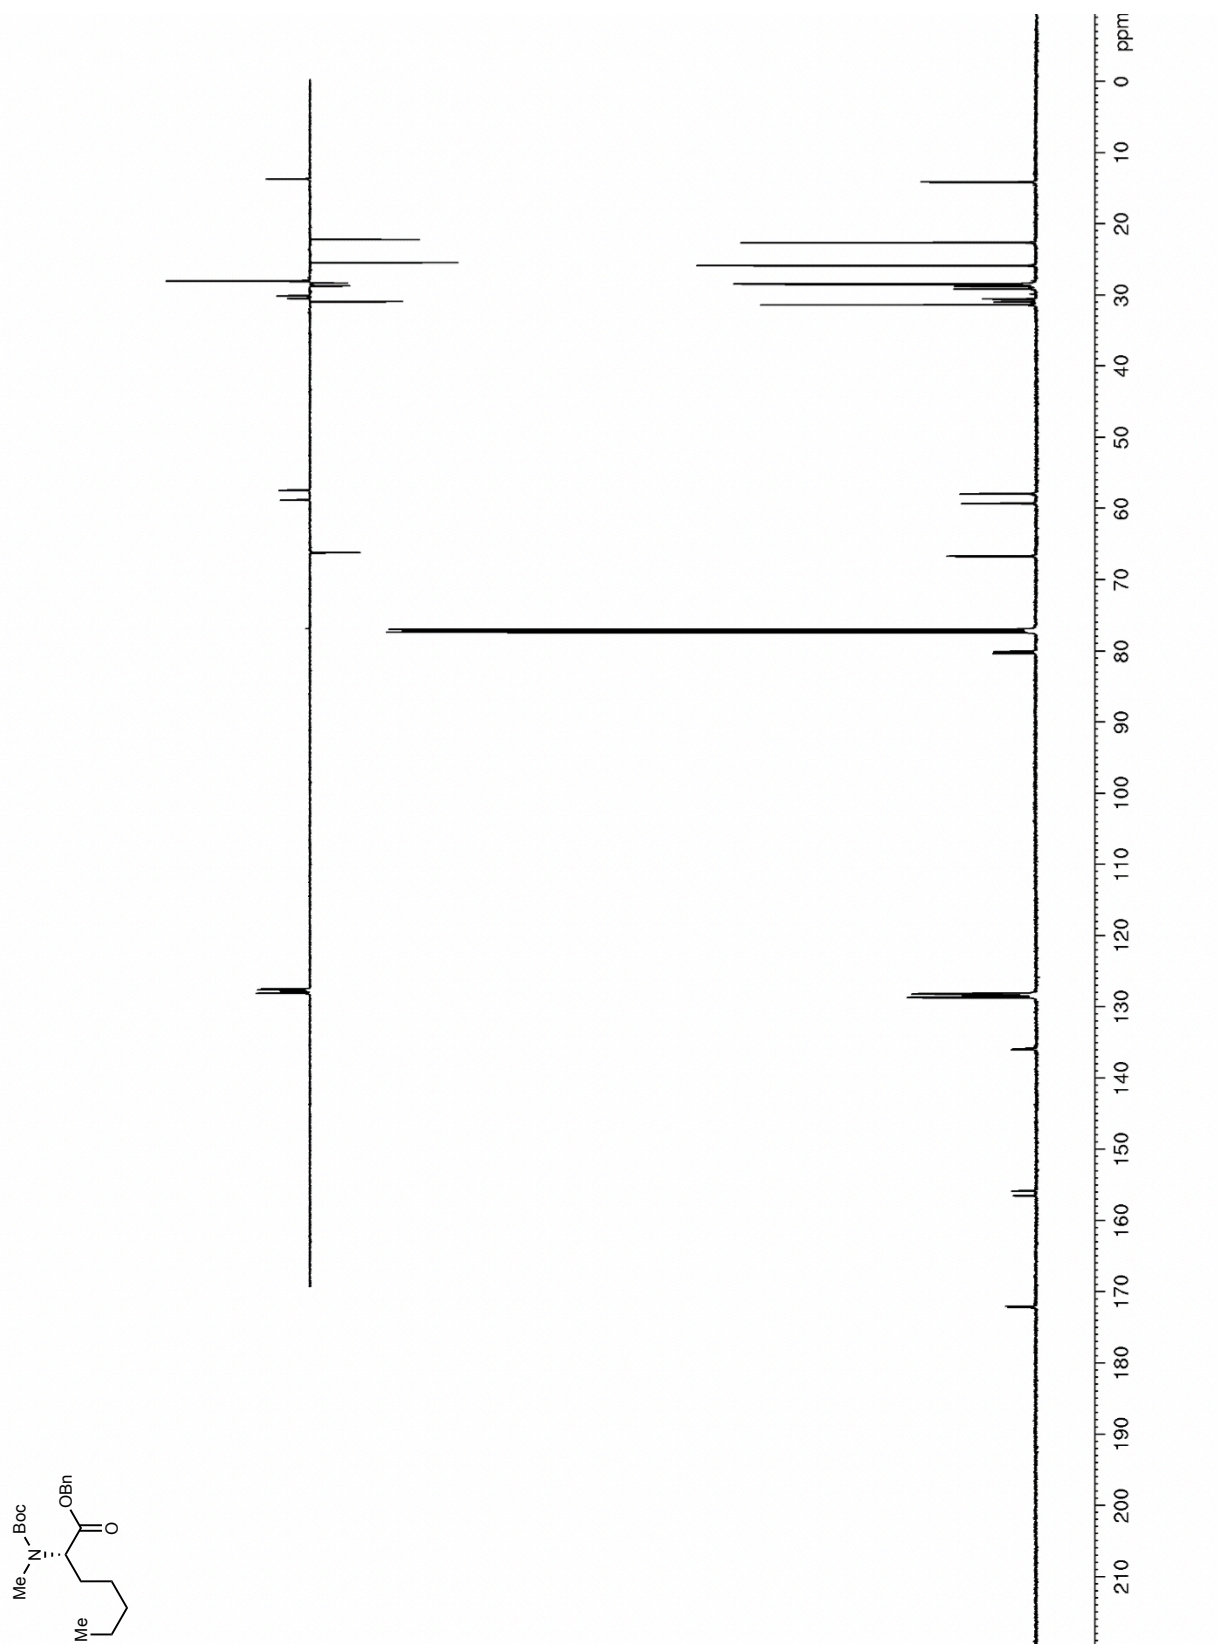



Figure S9.  $^1\text{H}$  NMR (600 MHz,  $\text{CDCl}_3$ ) of **23**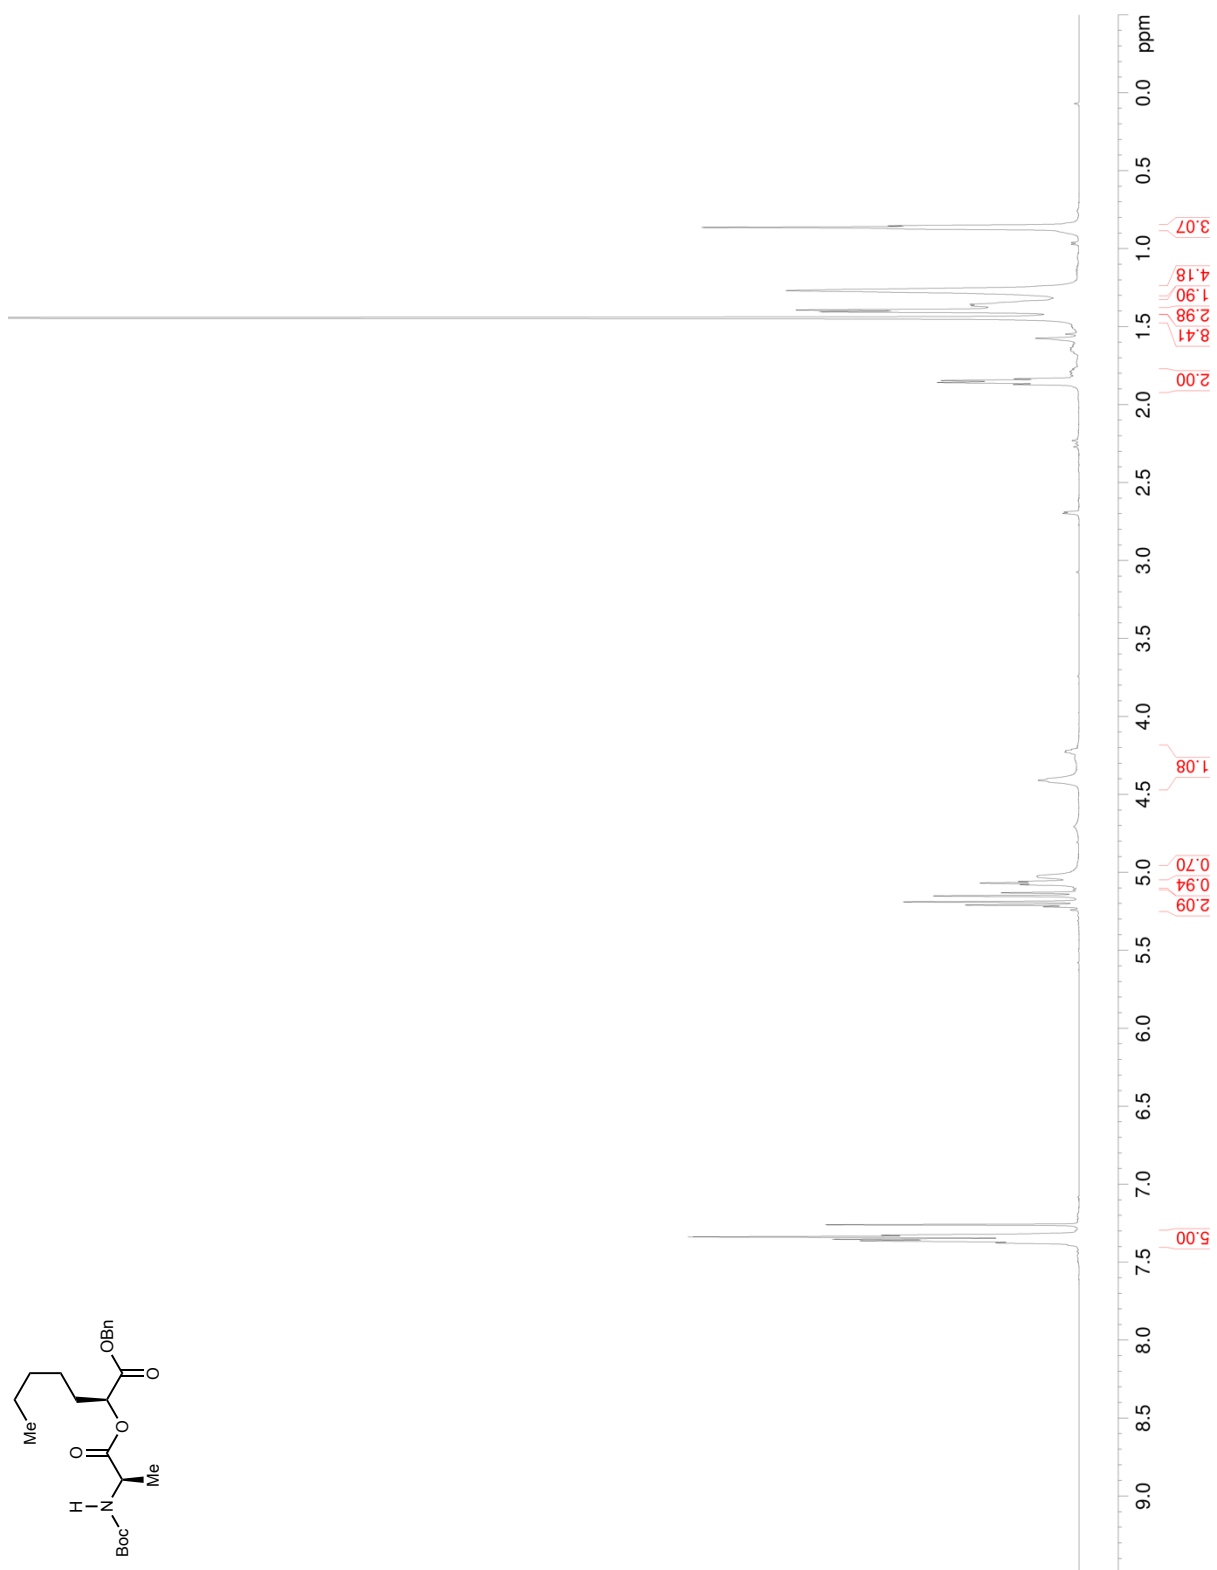

Figure S10.  $^{13}\text{C}$  NMR (150 MHz,  $\text{CDCl}_3$ ) of **23**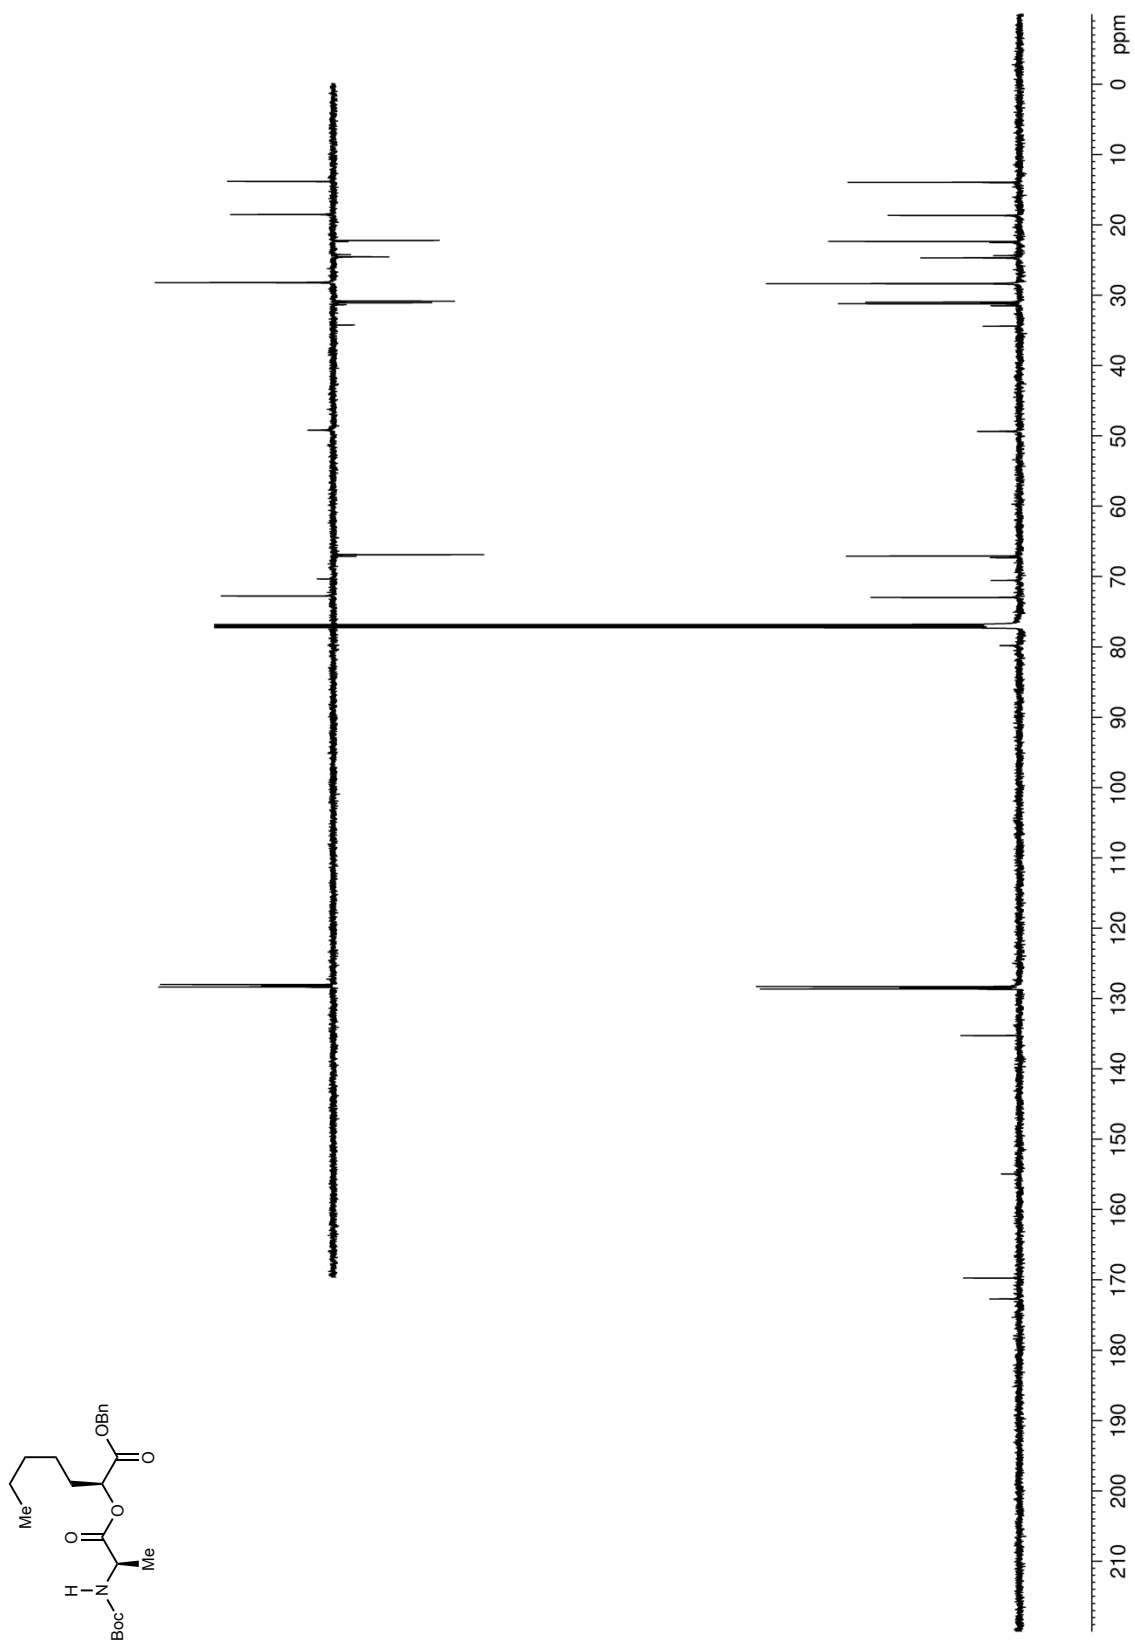

Figure S11.  $^1\text{H}$  NMR (600 MHz,  $\text{CDCl}_3$ ) of **29**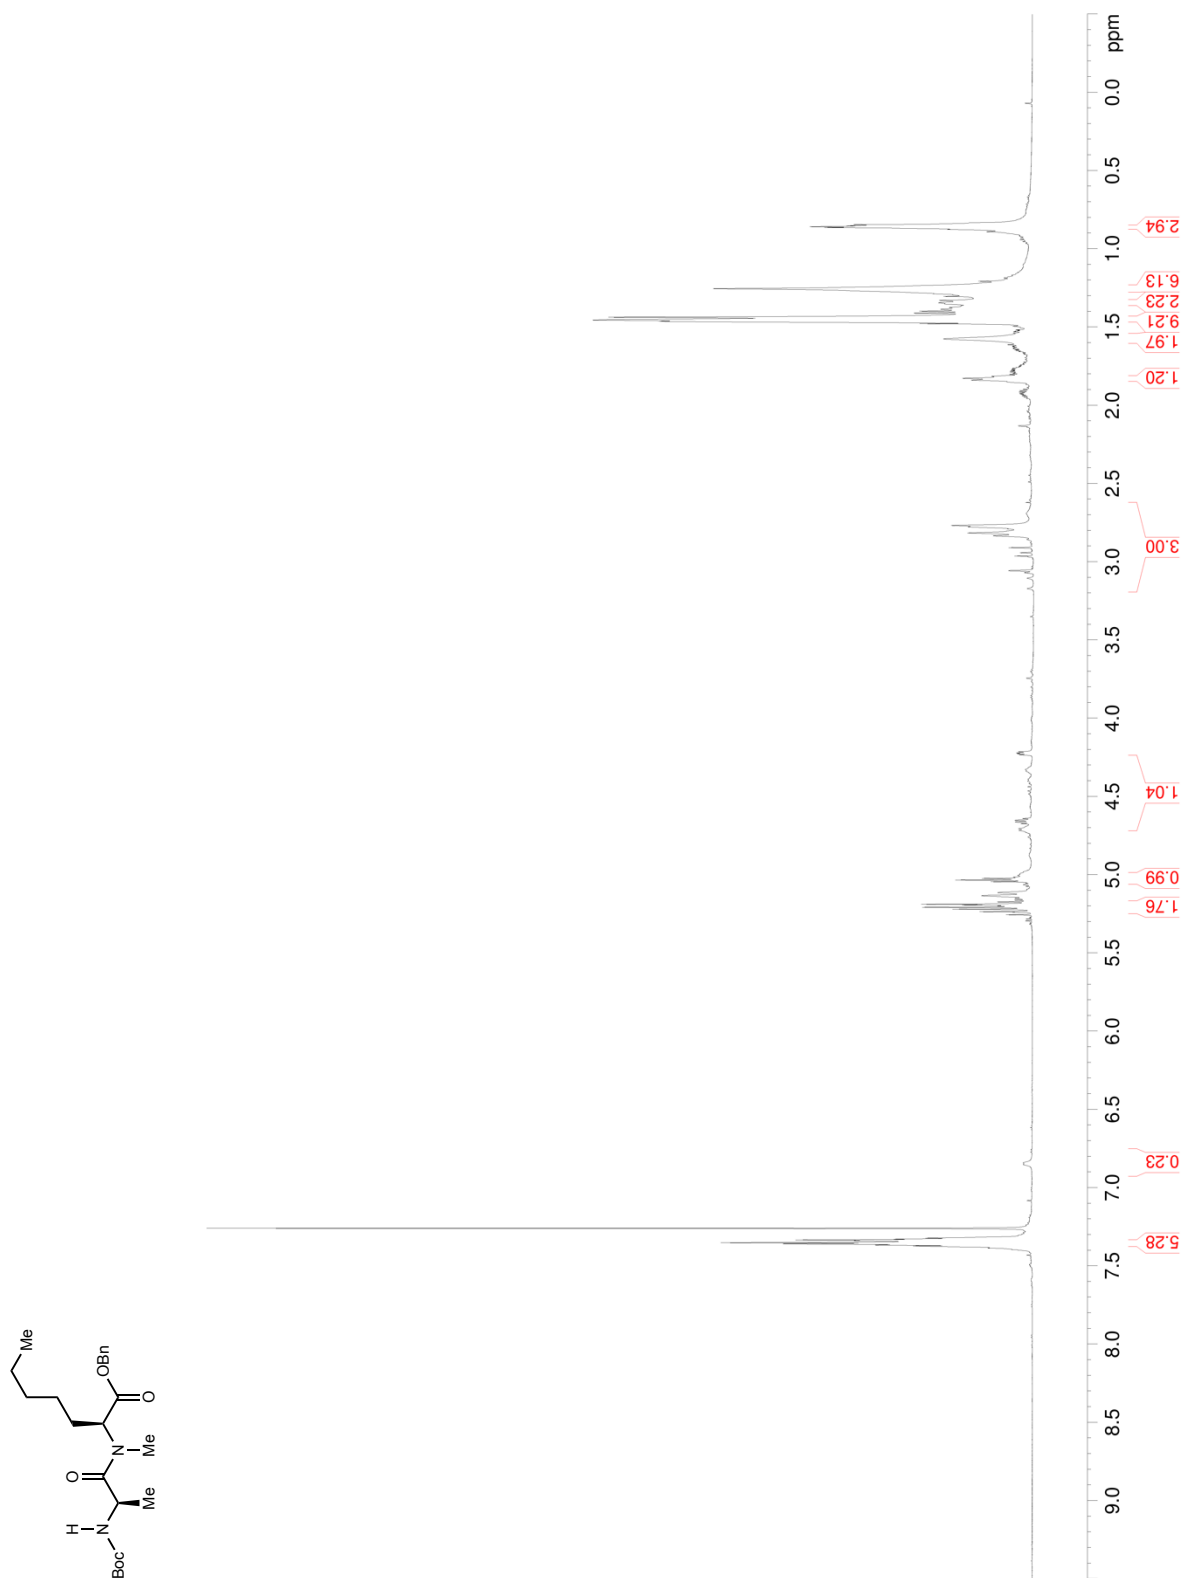

Figure S12.  $^{13}\text{C}$  NMR (150 MHz,  $\text{CDCl}_3$ ) of **29**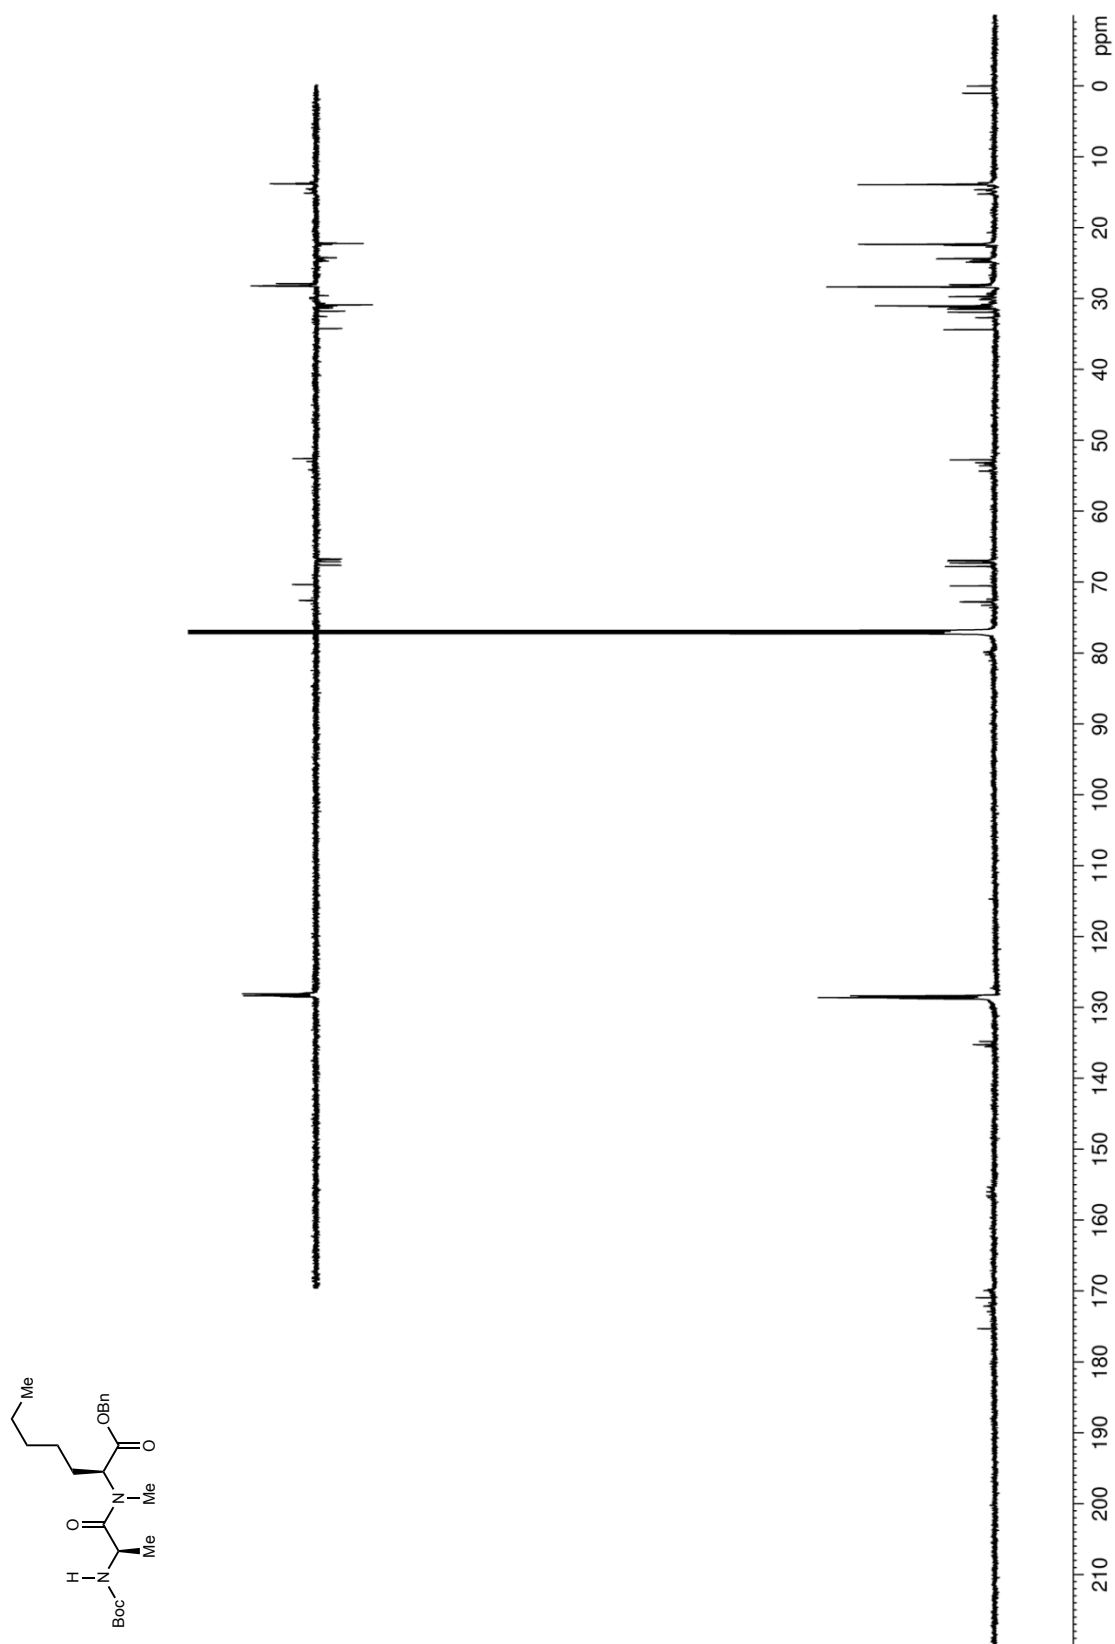

Figure S13.  $^1\text{H}$  NMR (600 MHz,  $\text{CDCl}_3$ ) of **32**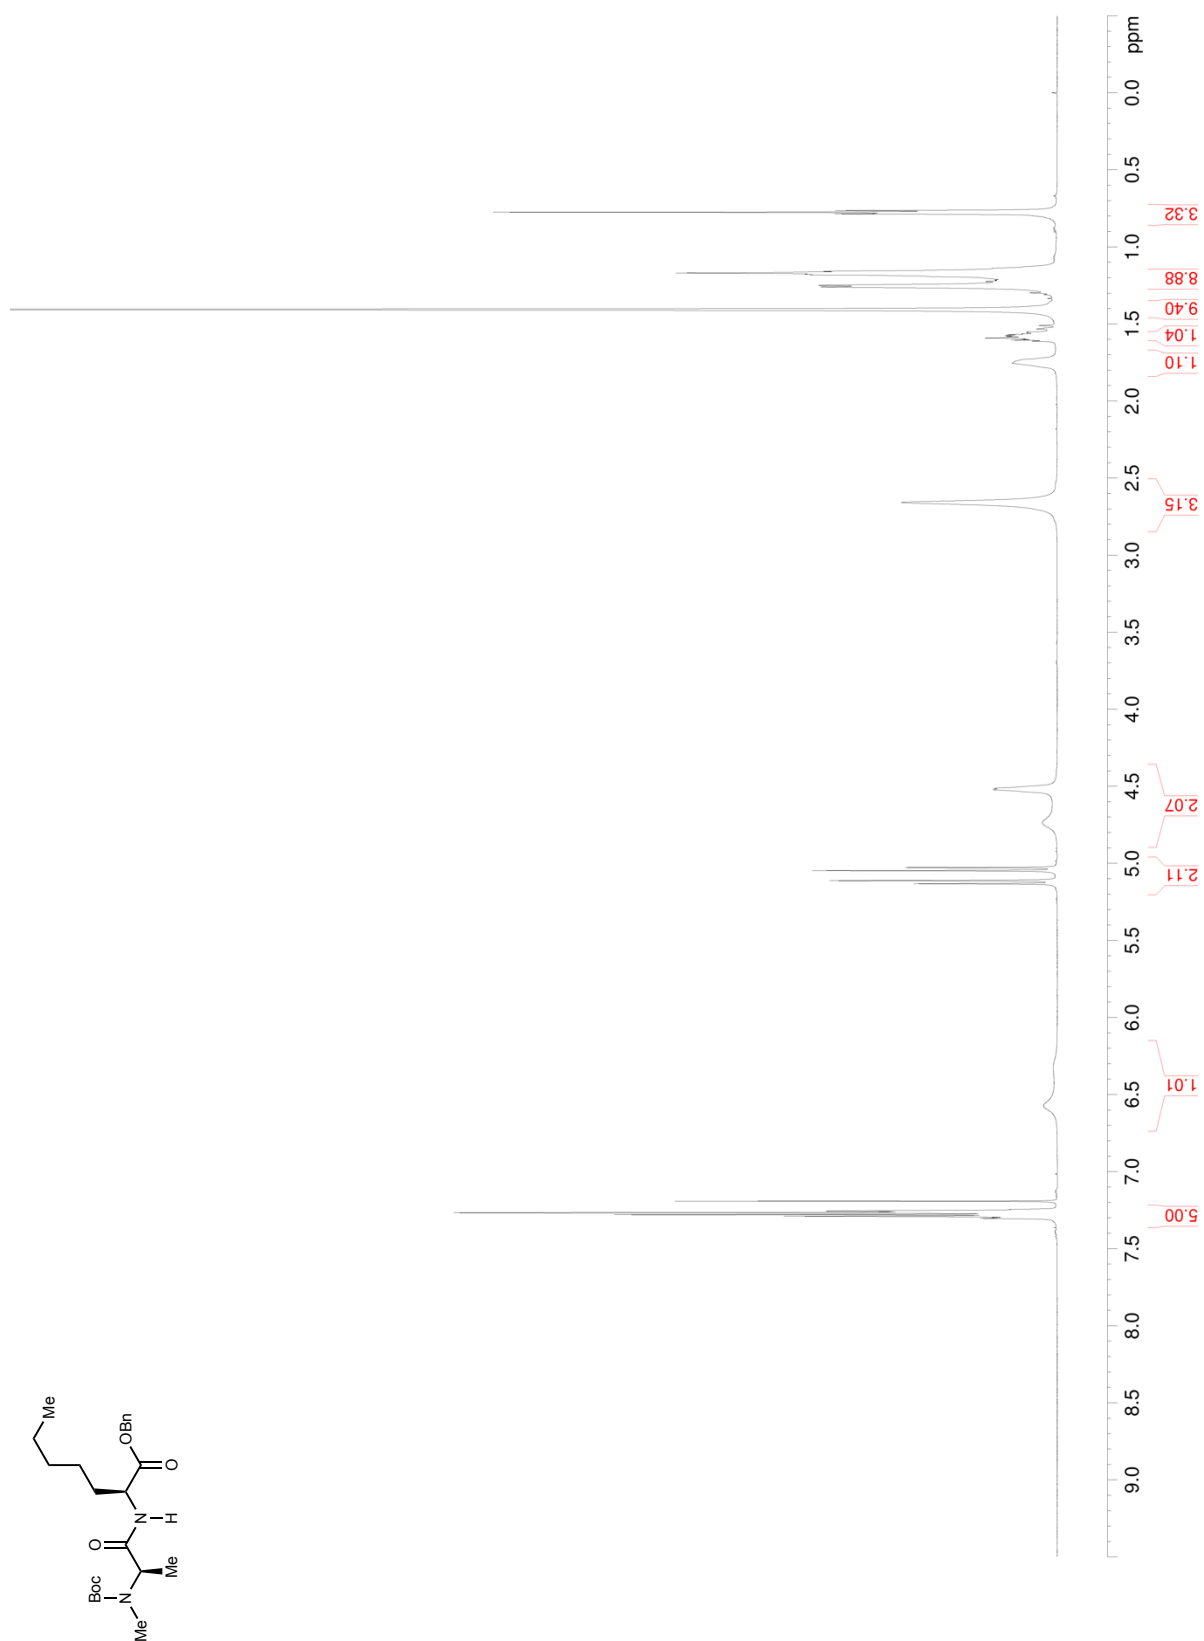

**Figure S14.**  $^{13}\text{C}$  NMR (150 MHz,  $\text{CDCl}_3$ ) of **32**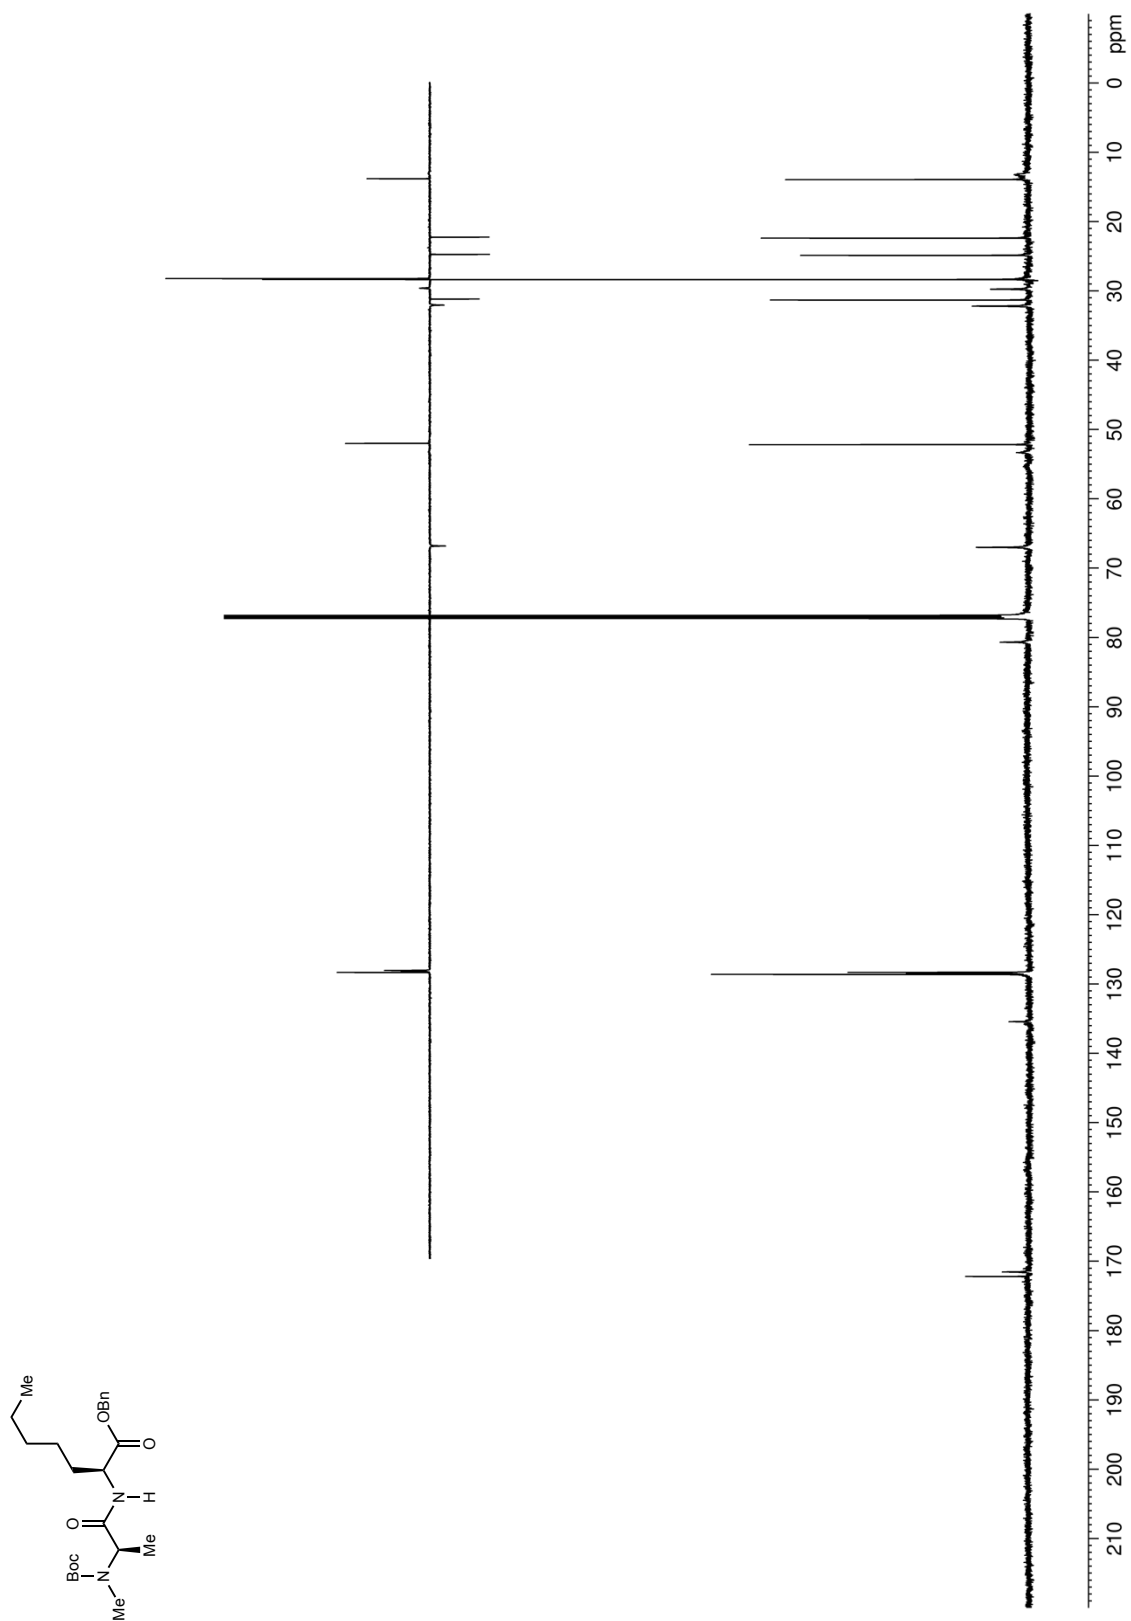

Figure S15.  $^1\text{H}$  NMR (600 MHz,  $\text{CDCl}_3$ ) of **35**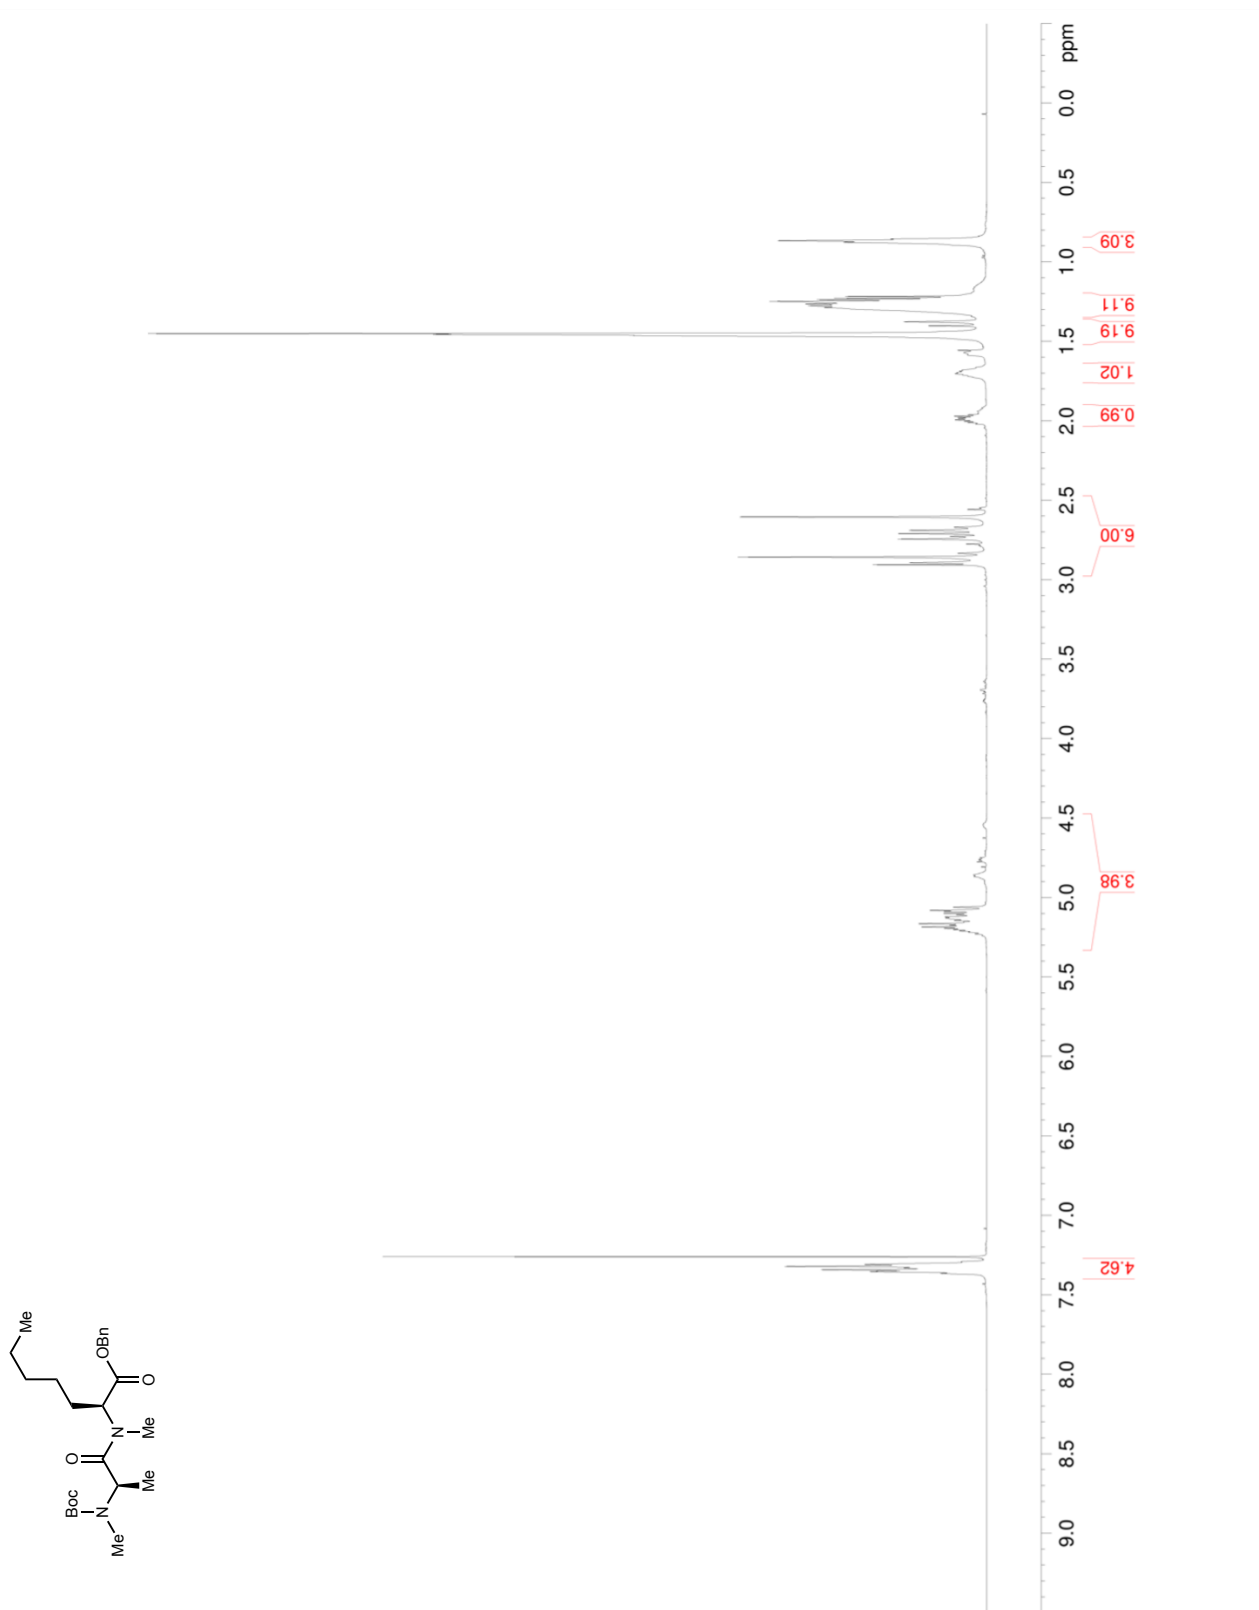

Figure S16.  $^{13}\text{C}$  NMR (150 MHz,  $\text{CDCl}_3$ ) of **35**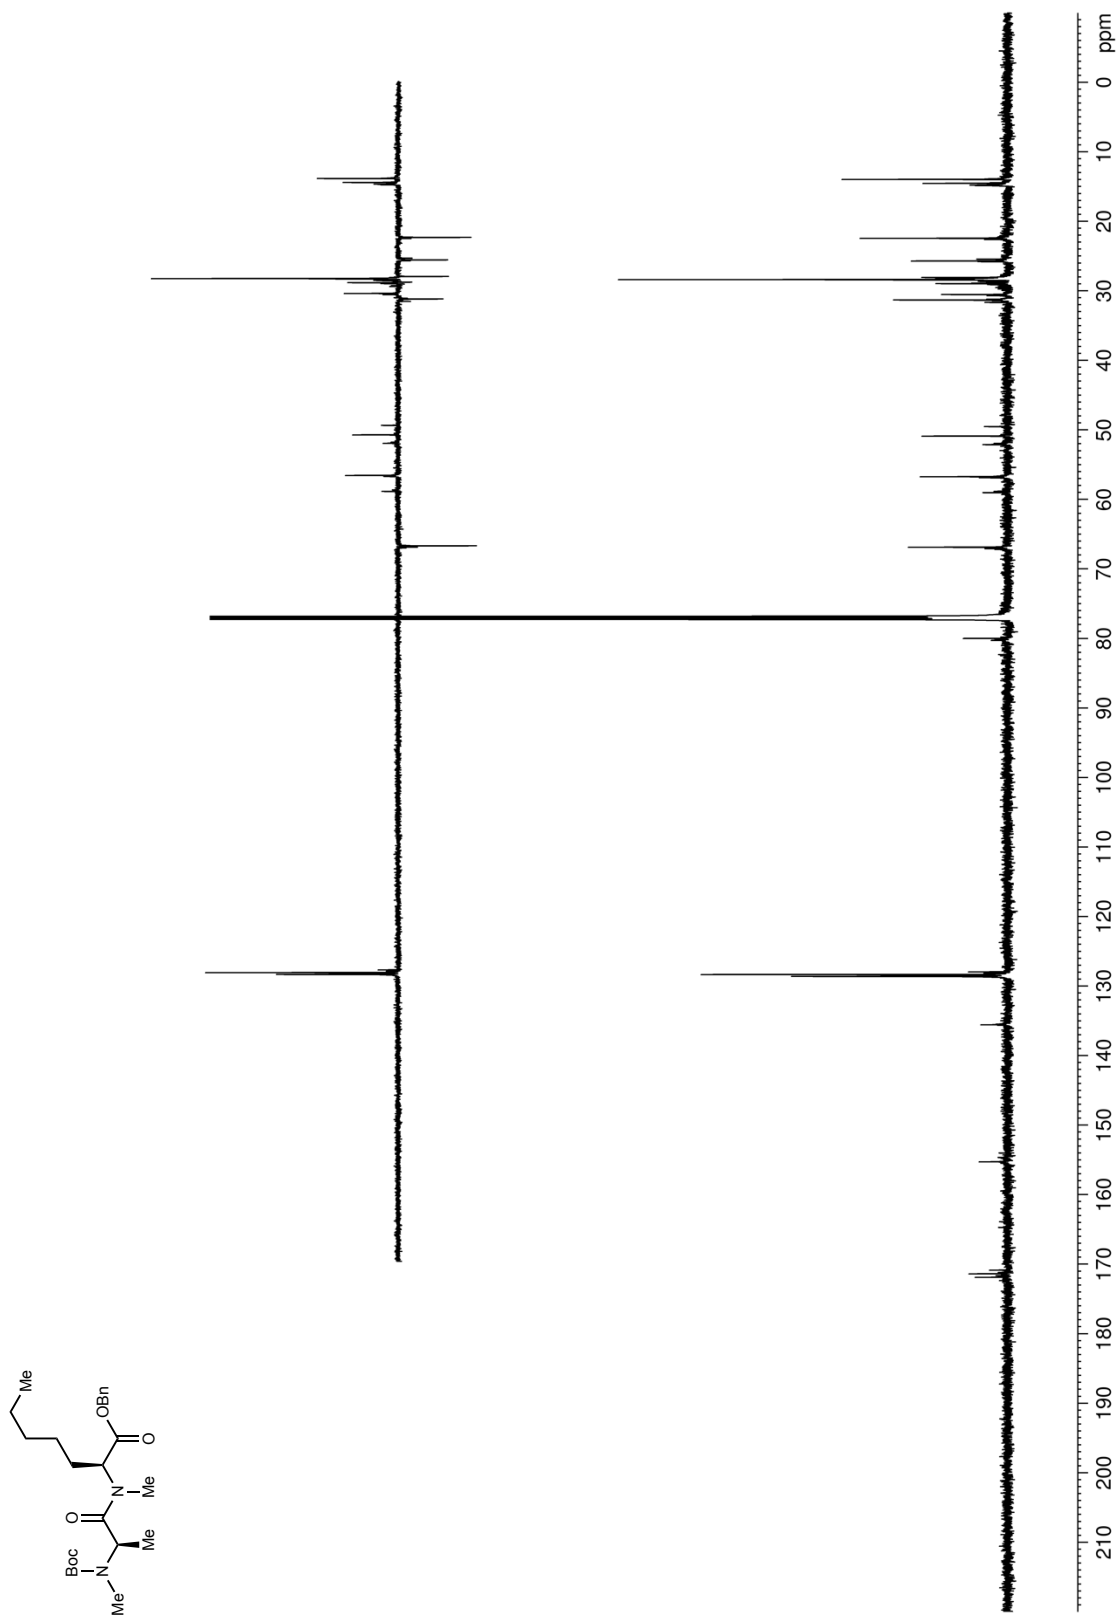



Figure S17.  $^1\text{H}$  NMR (600 MHz,  $\text{CDCl}_3$ ) of T38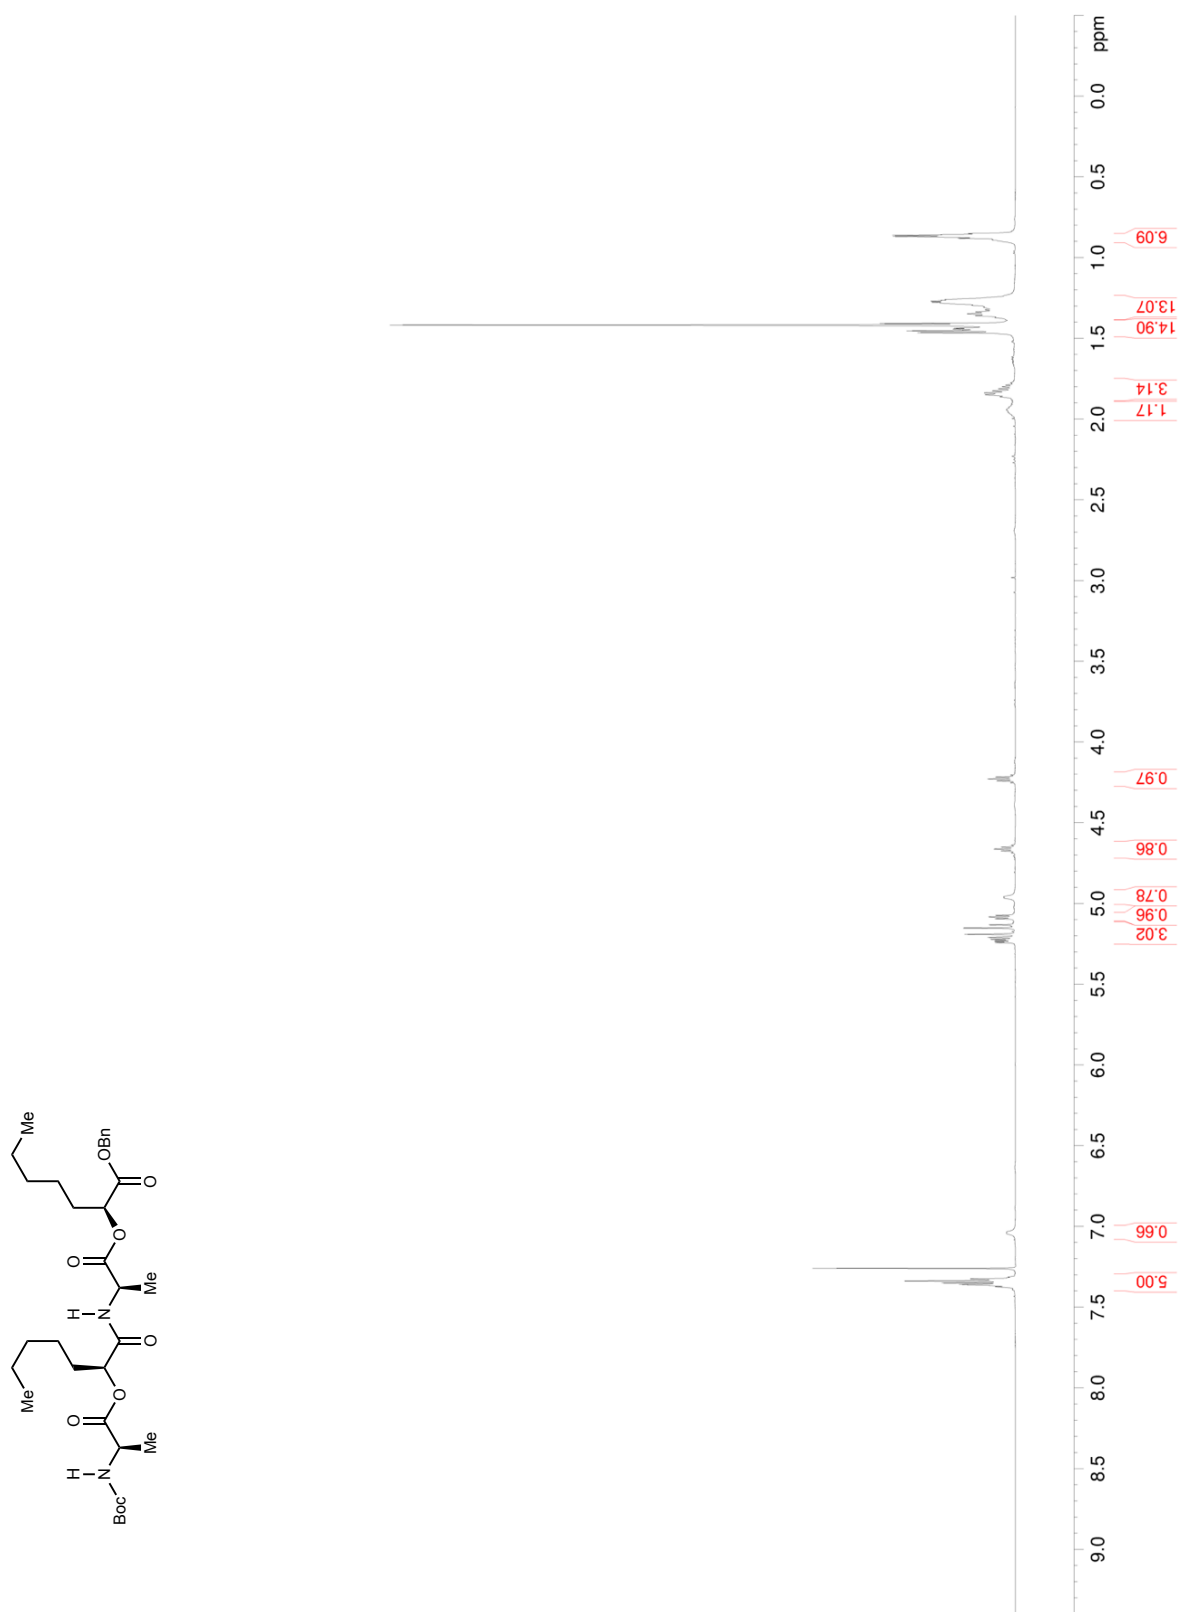

Figure S18.  $^{13}\text{C}$  NMR (150 MHz,  $\text{CDCl}_3$ ) of T38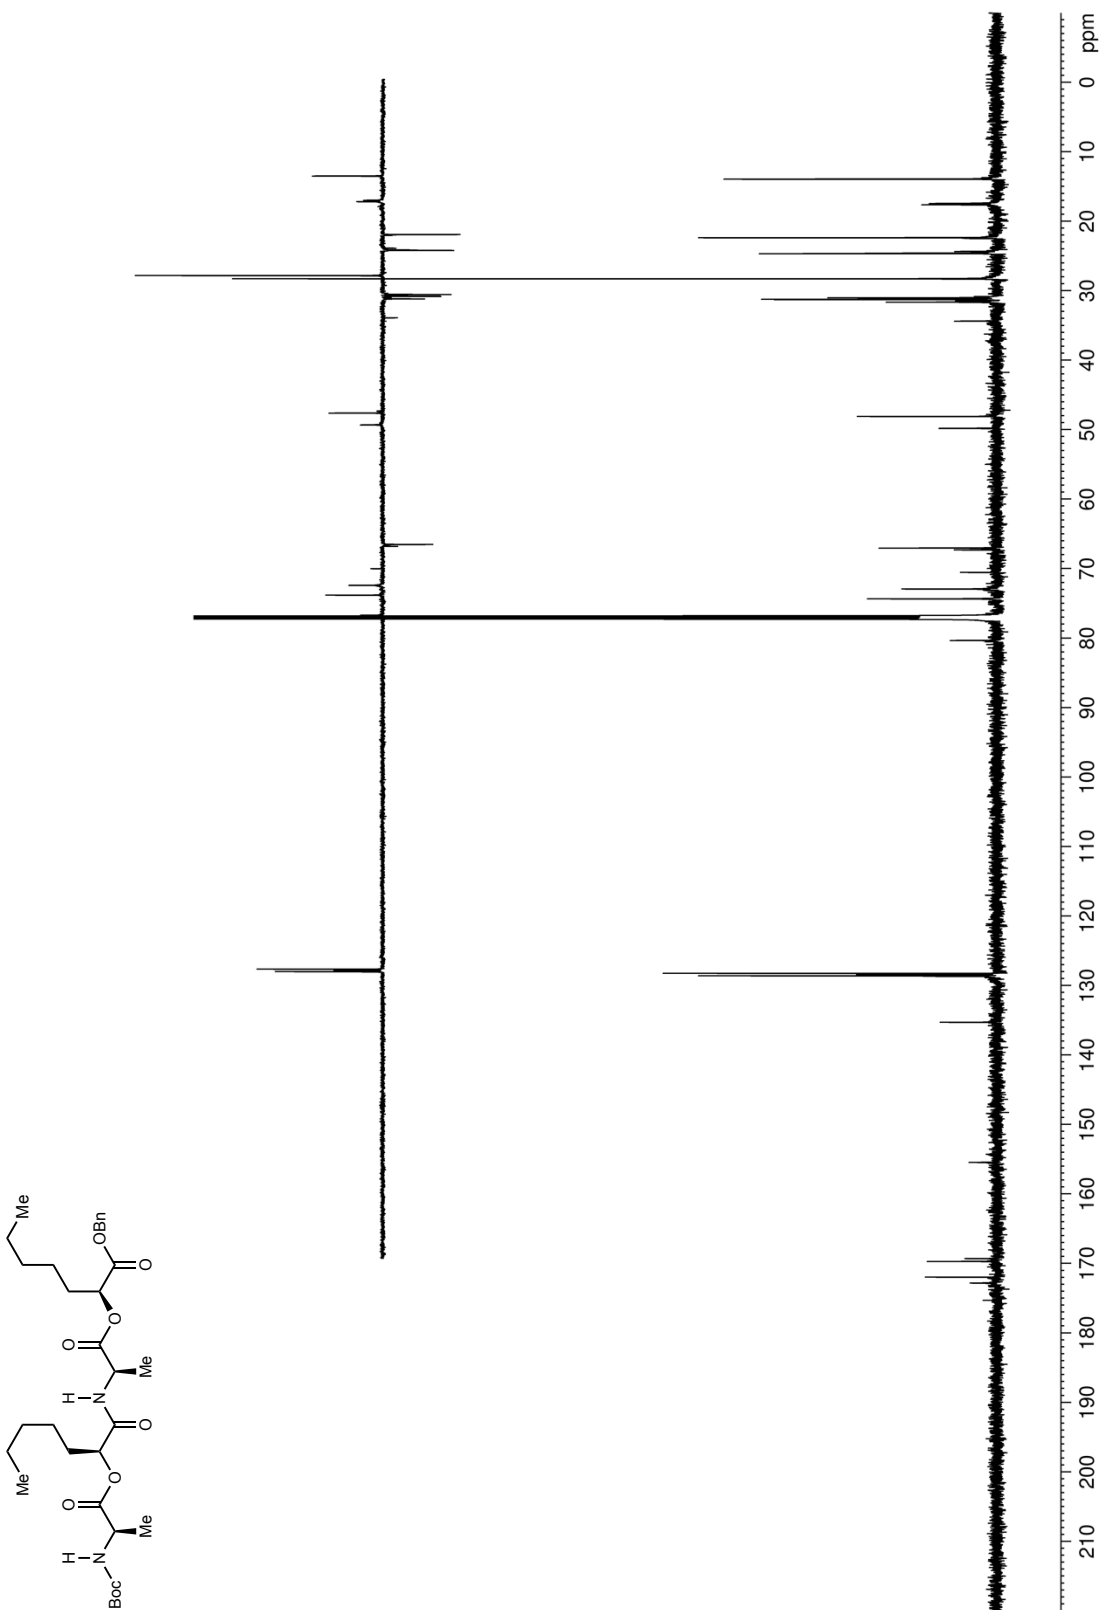

Figure S19.  $^1\text{H}$  NMR (600 MHz,  $\text{CDCl}_3$ ) of T40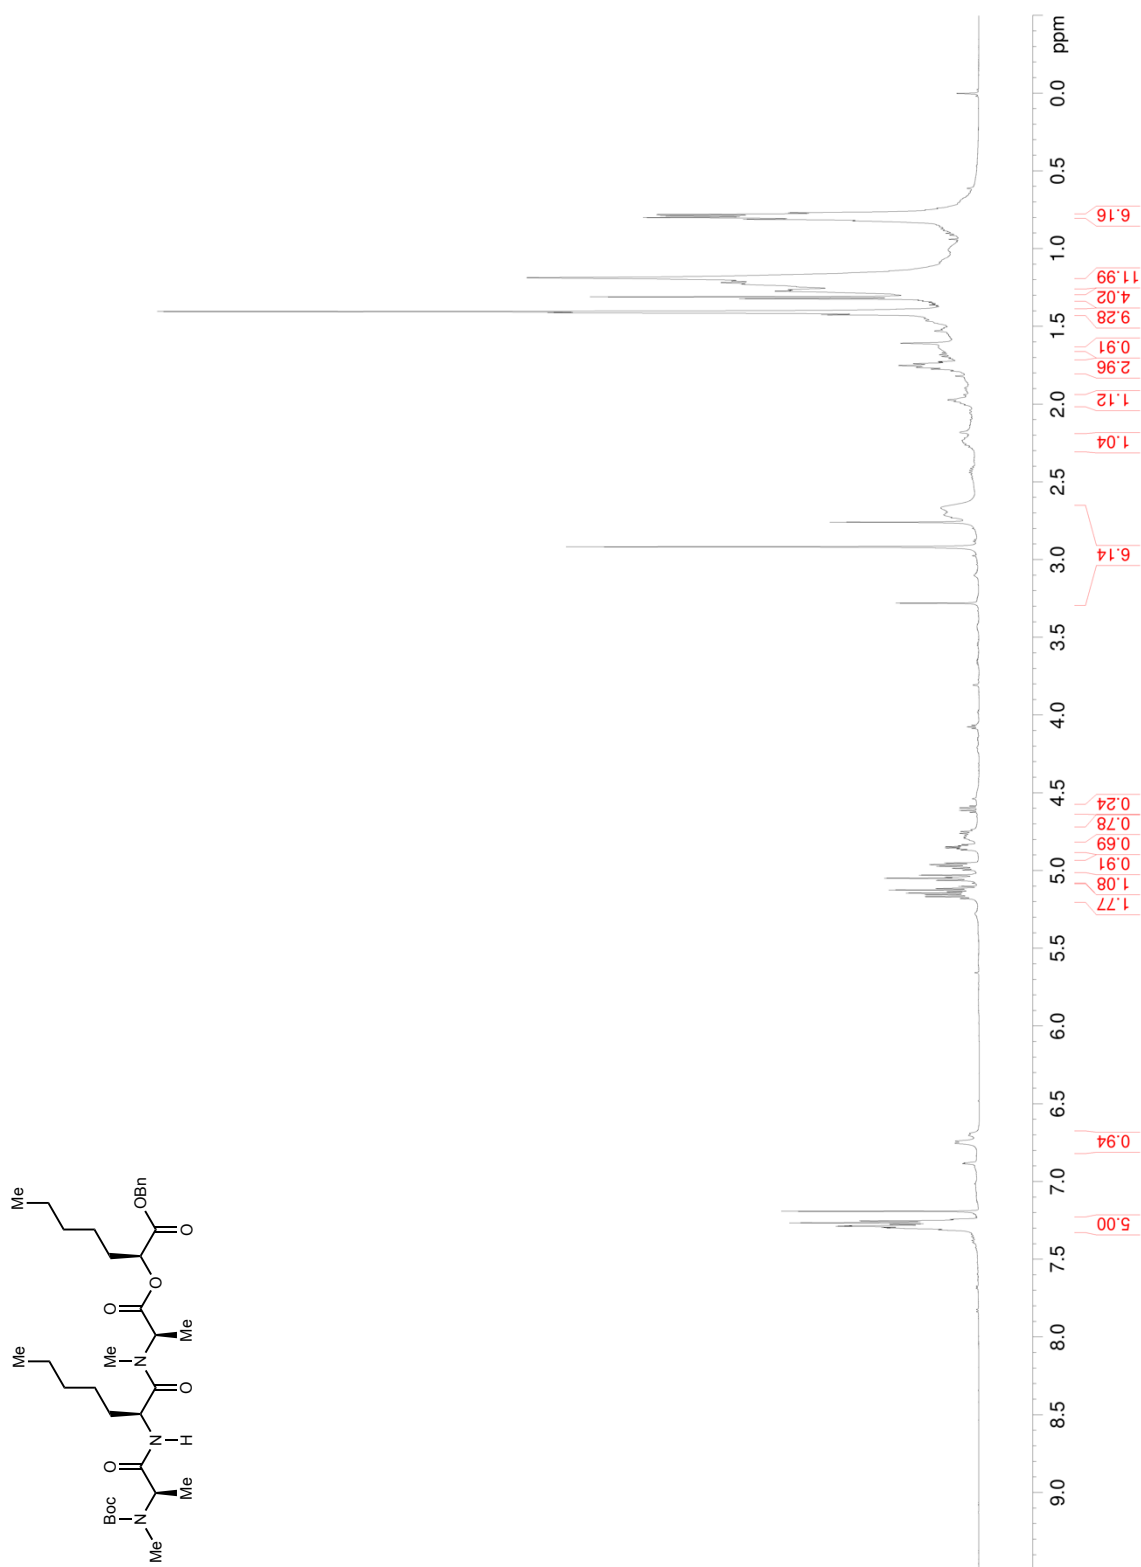

Figure S20.  $^{13}\text{C}$  NMR (150 MHz,  $\text{CDCl}_3$ ) of T40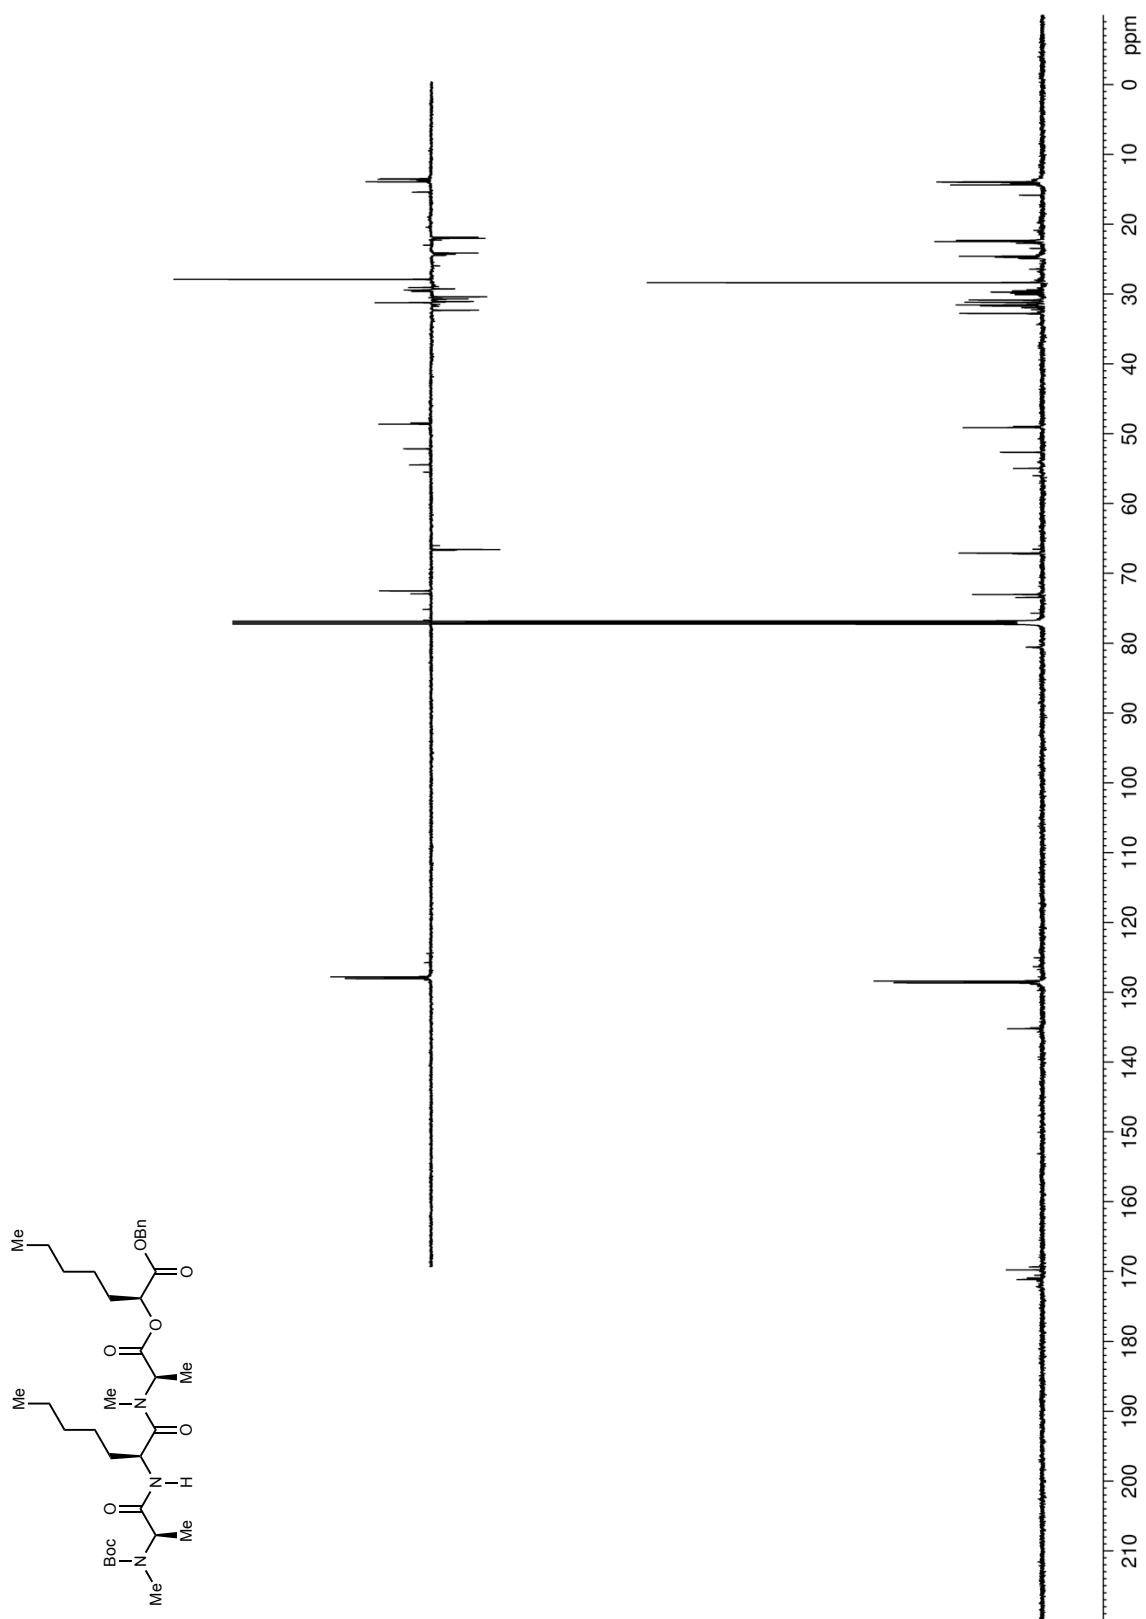

Figure S21.  $^1\text{H}$  NMR (600 MHz,  $\text{CDCl}_3$ ) of T41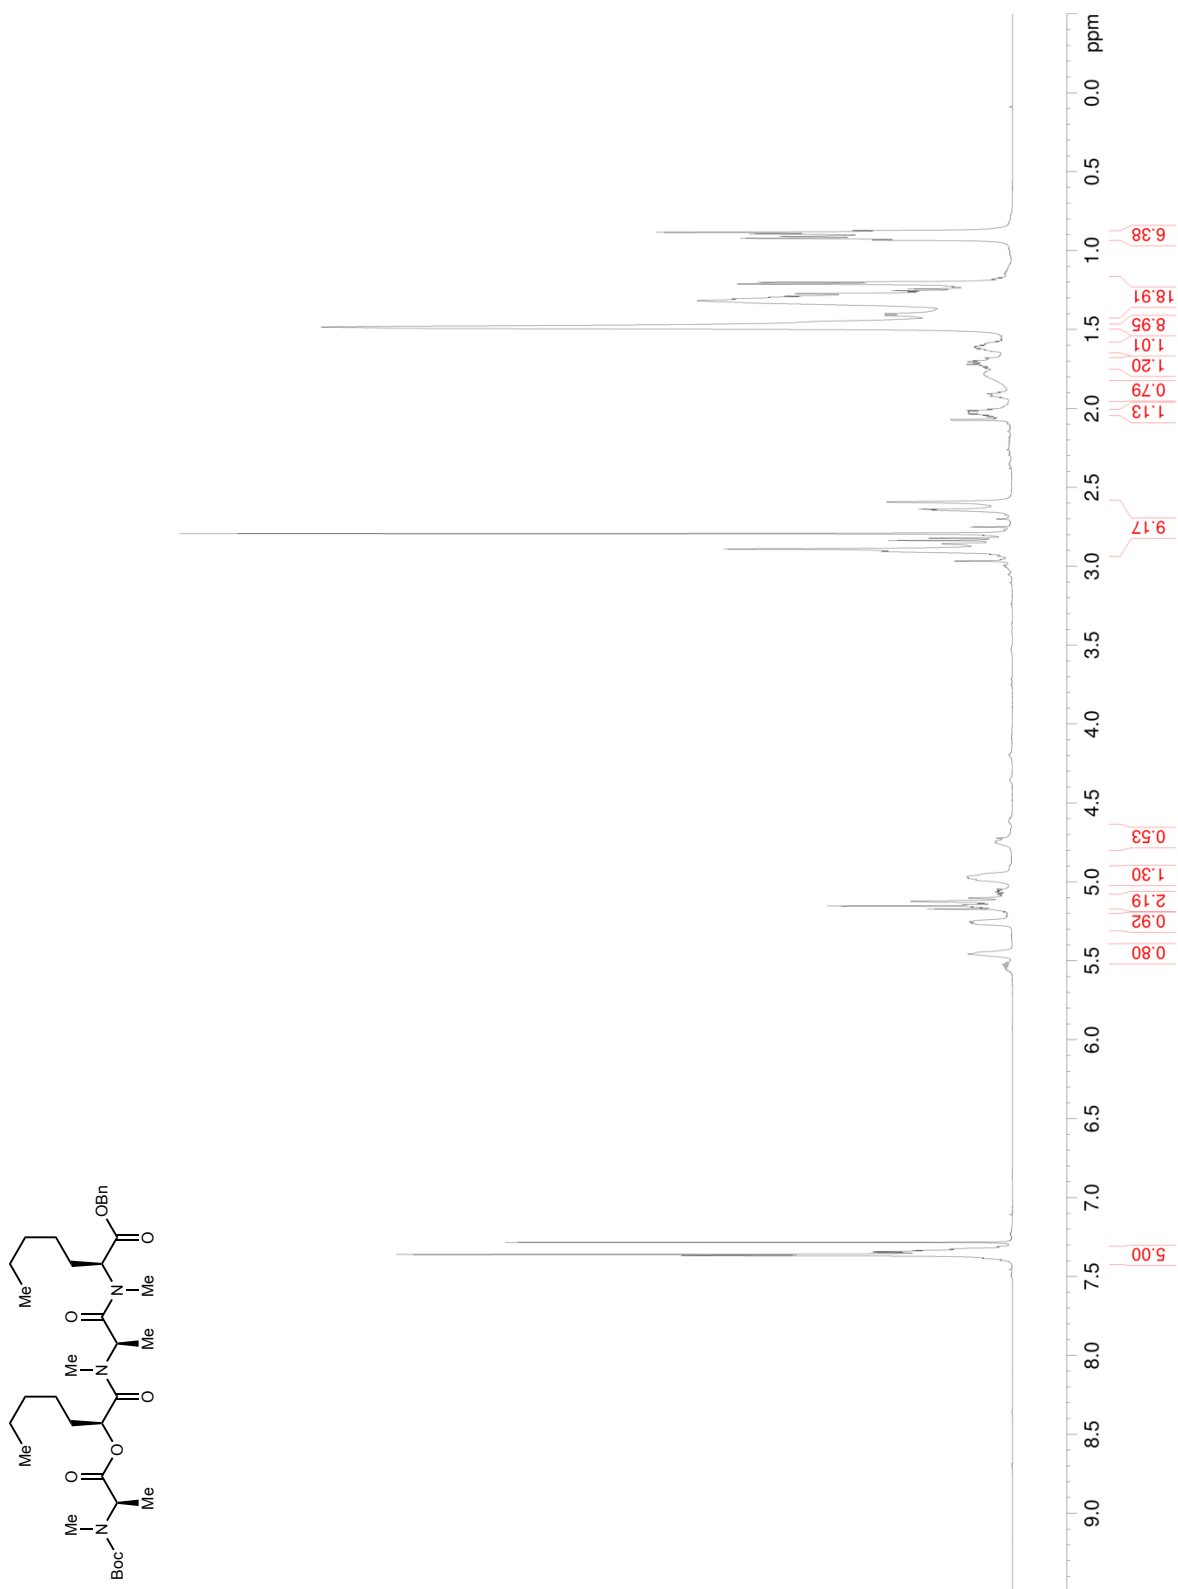

Figure S22.  $^{13}\text{C}$  NMR (150 MHz,  $\text{CDCl}_3$ ) of T41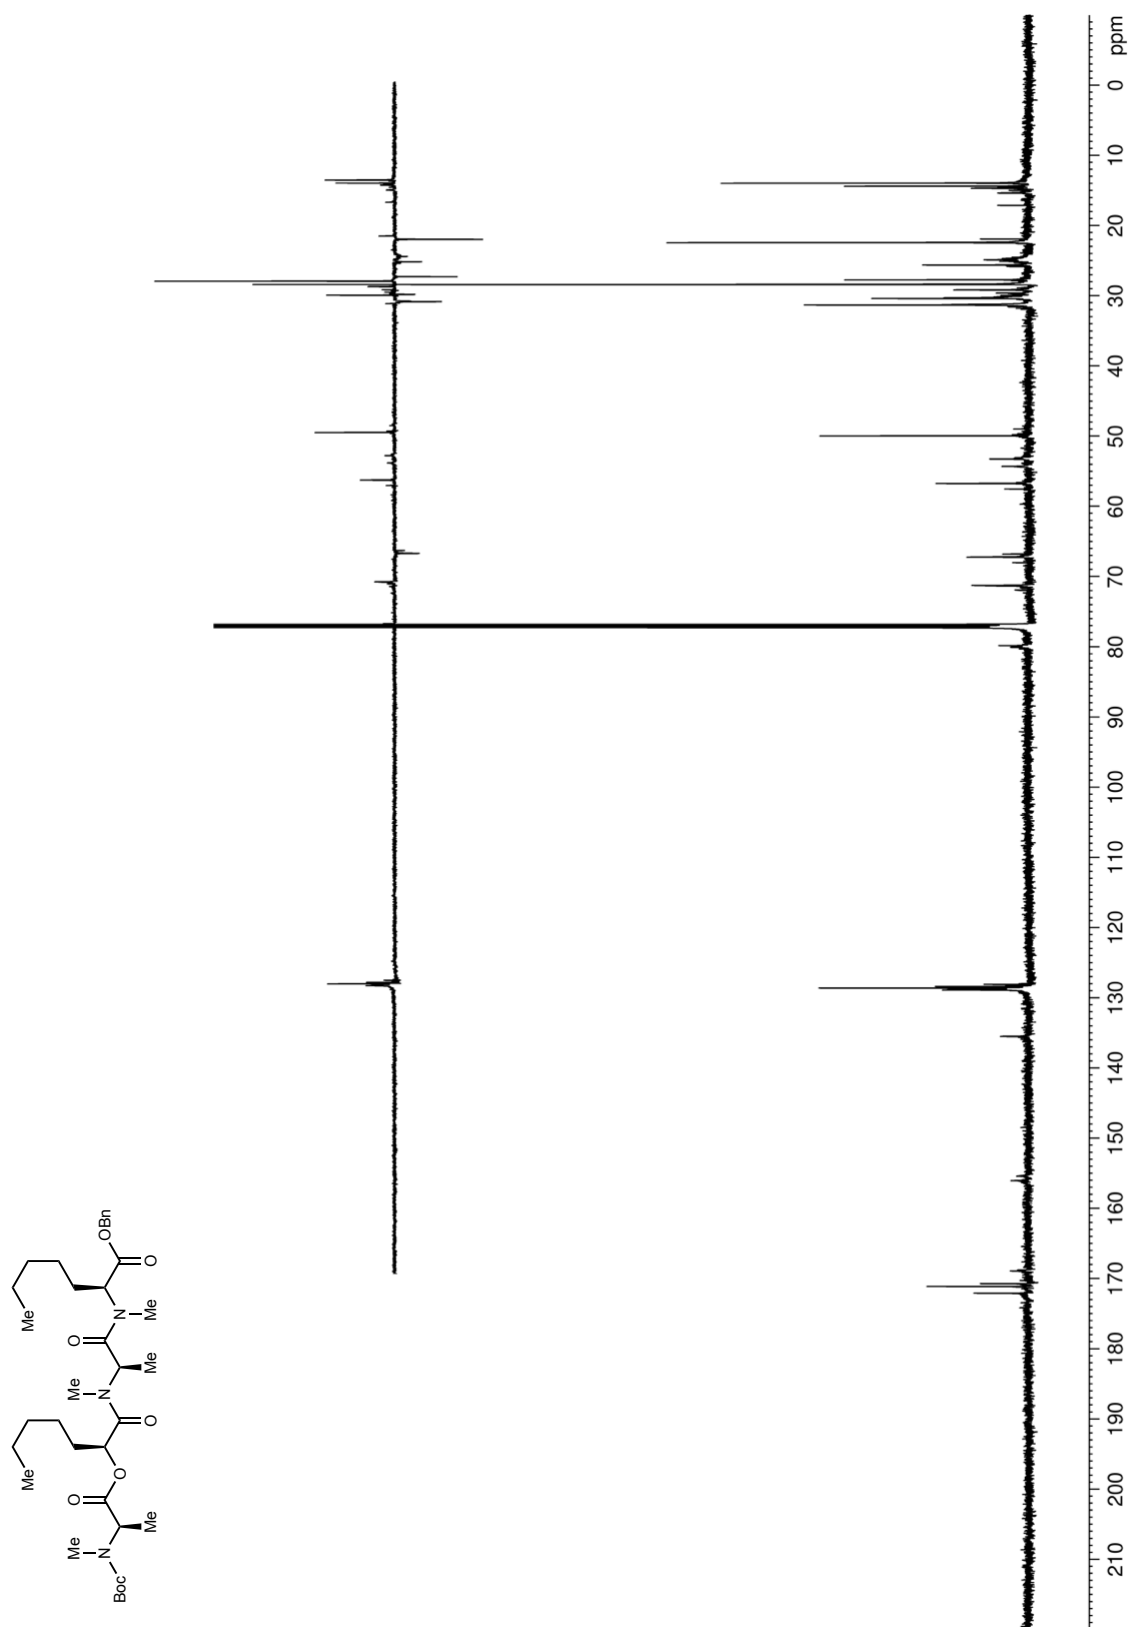

Figure S23.  $^1\text{H}$  NMR (600 MHz,  $\text{CDCl}_3$ ) of T42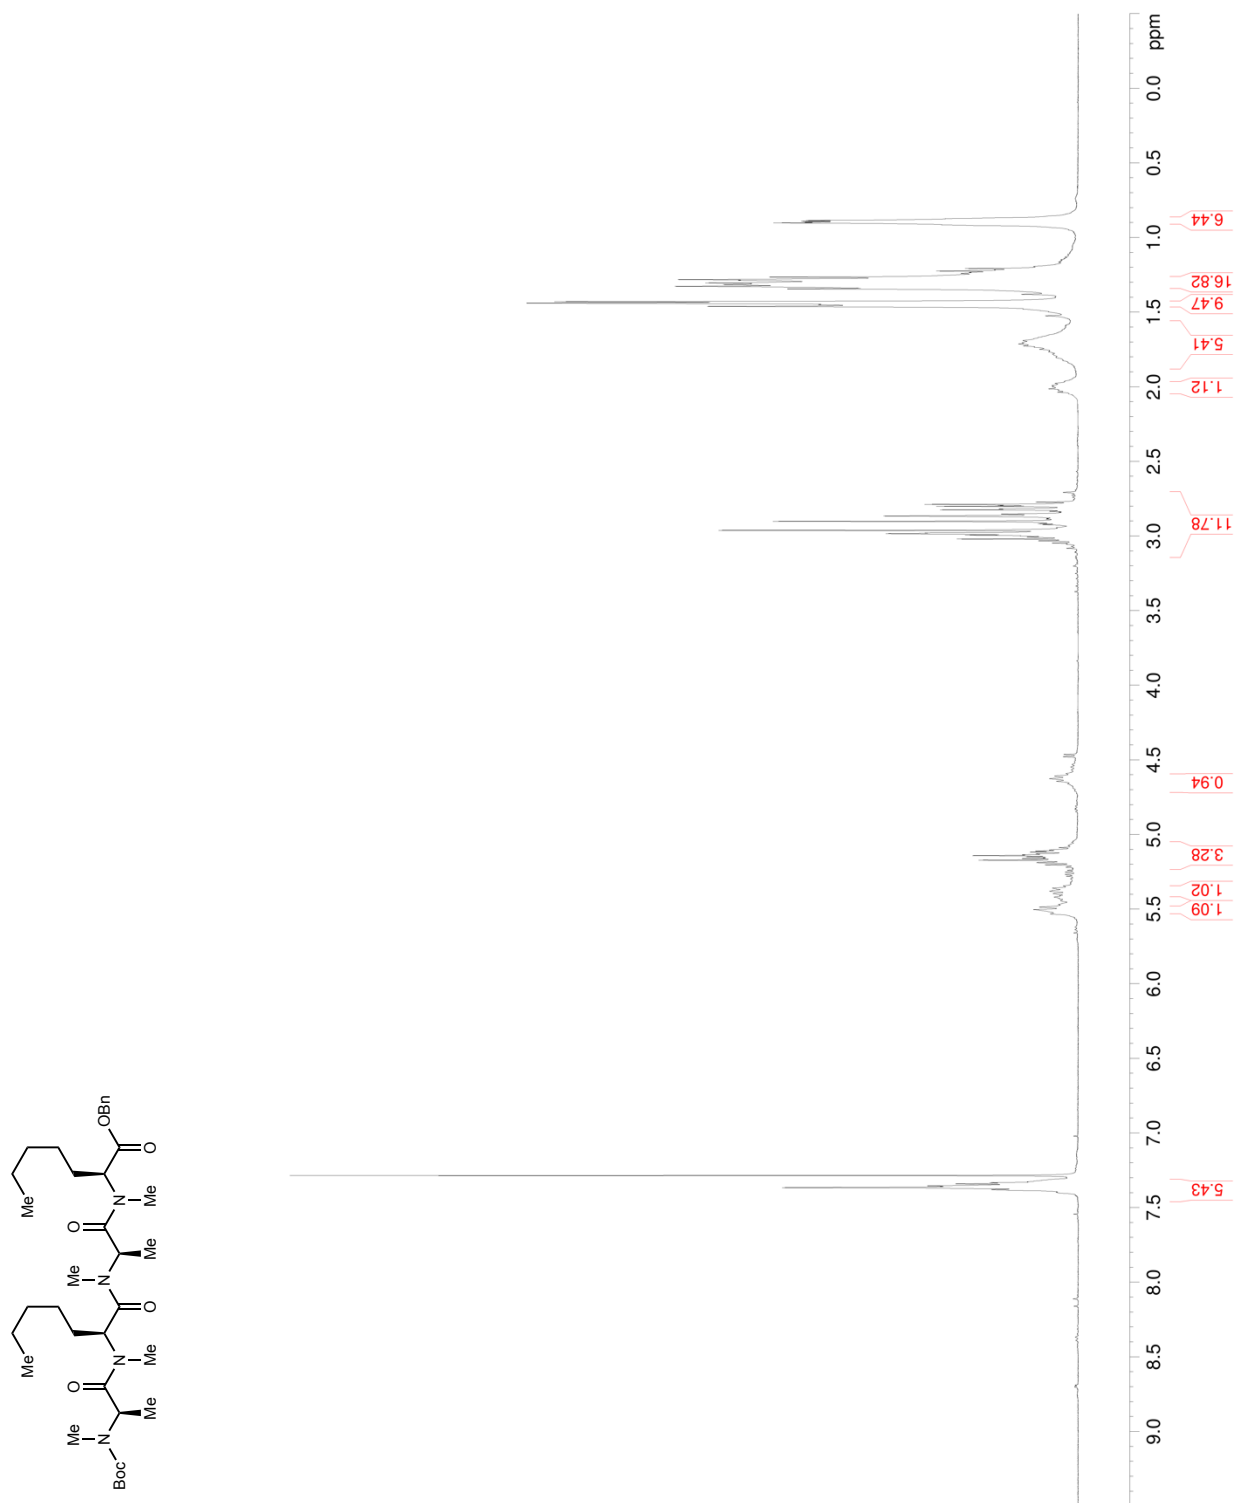





Figure S25.  $^1\text{H}$  NMR (600 MHz,  $\text{CDCl}_3$ ) of T43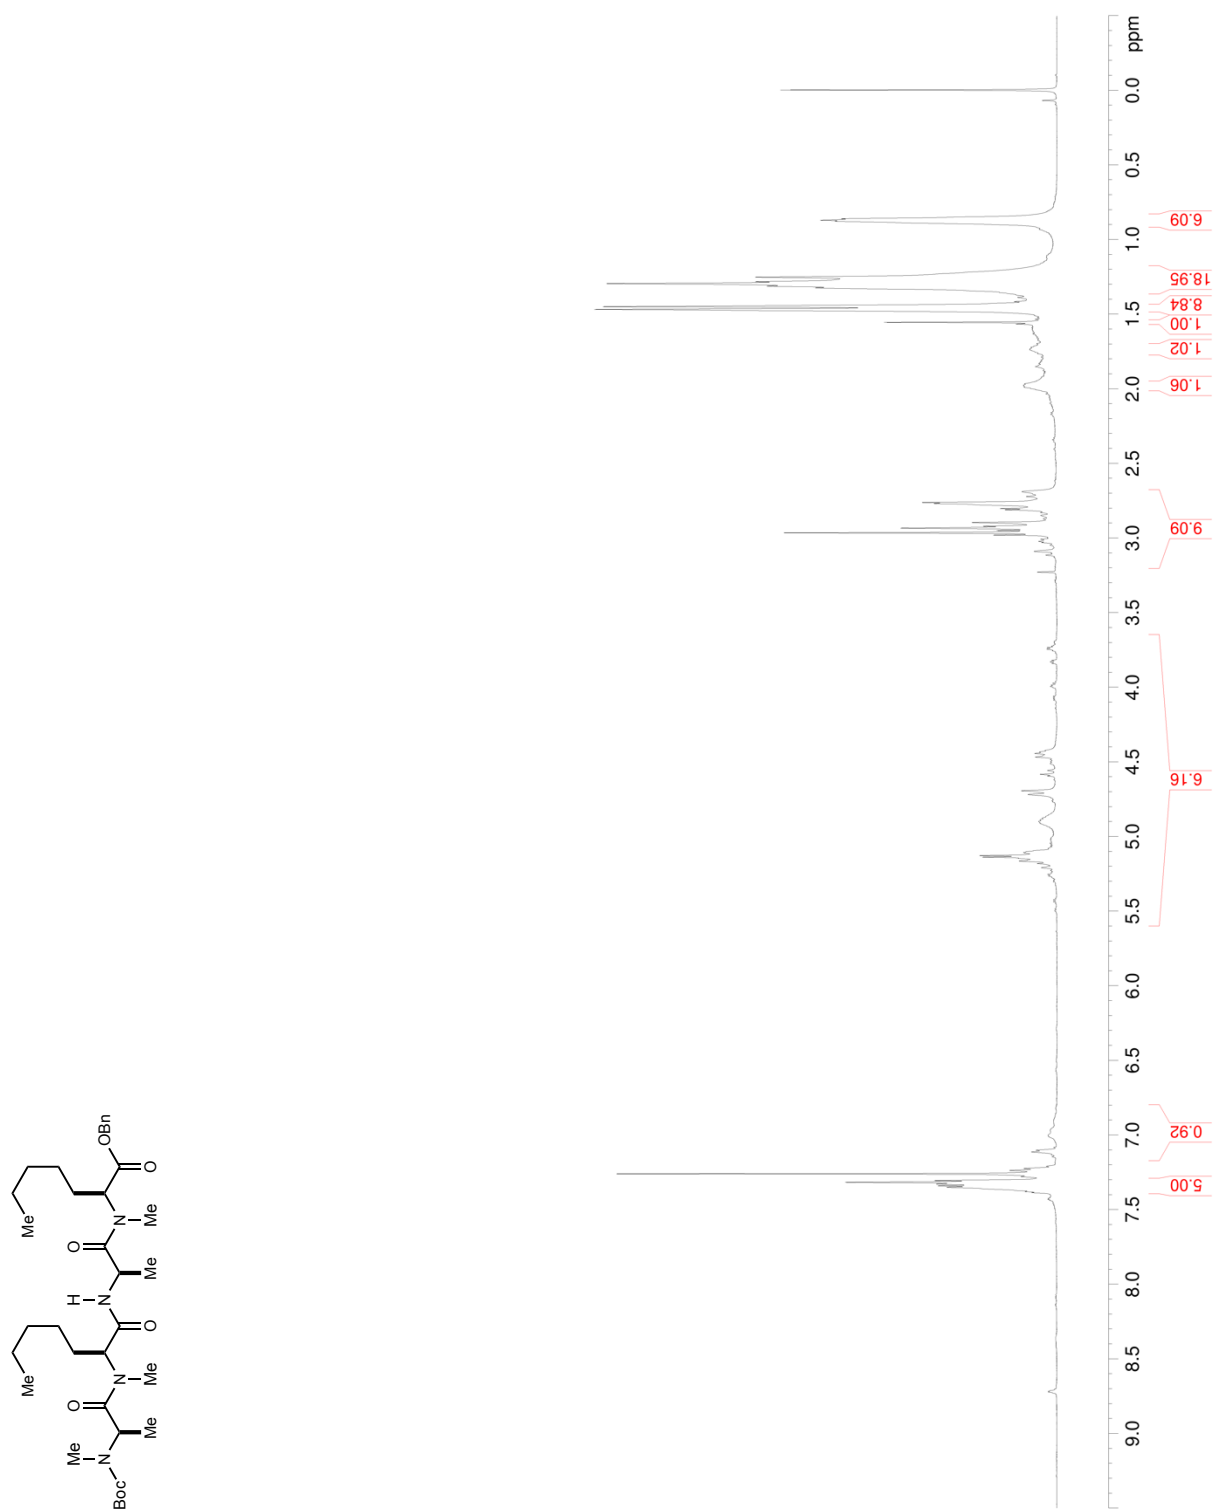



Figure S27.  $^1\text{H}$  NMR (600 MHz,  $\text{CDCl}_3$ ) of T44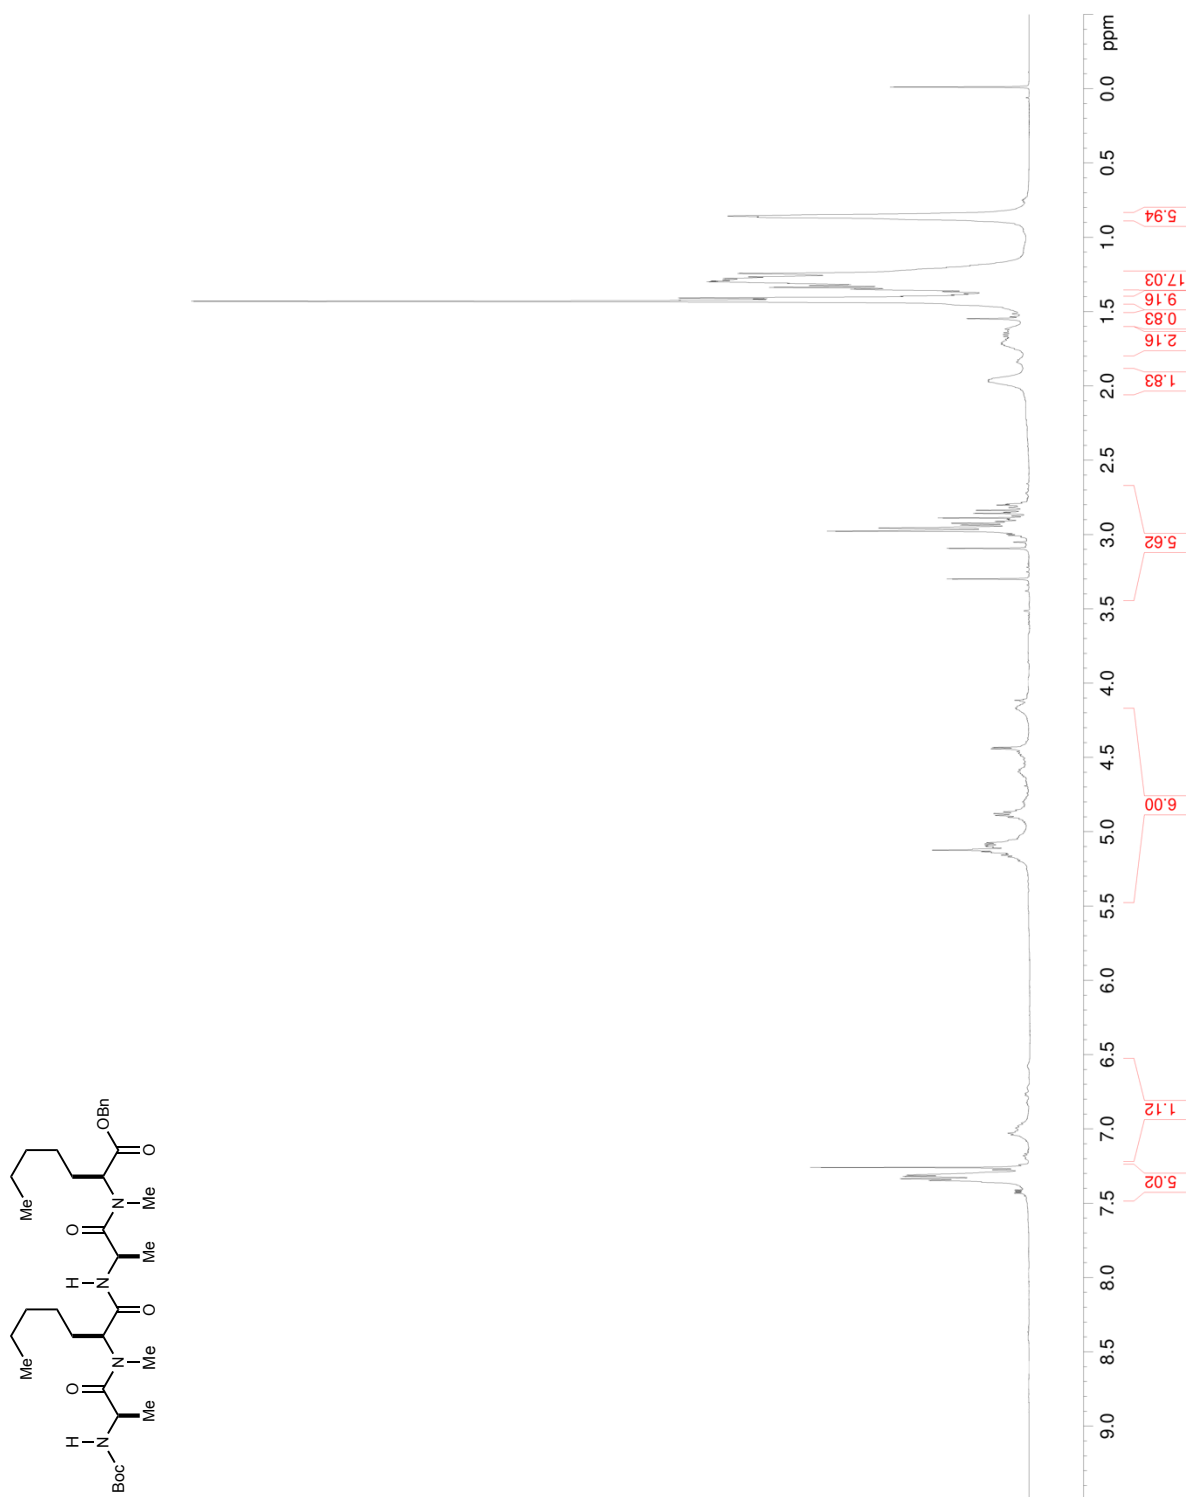

**Figure S28.**  $^{13}\text{C}$  NMR (150 MHz,  $\text{CDCl}_3$ ) of **T44**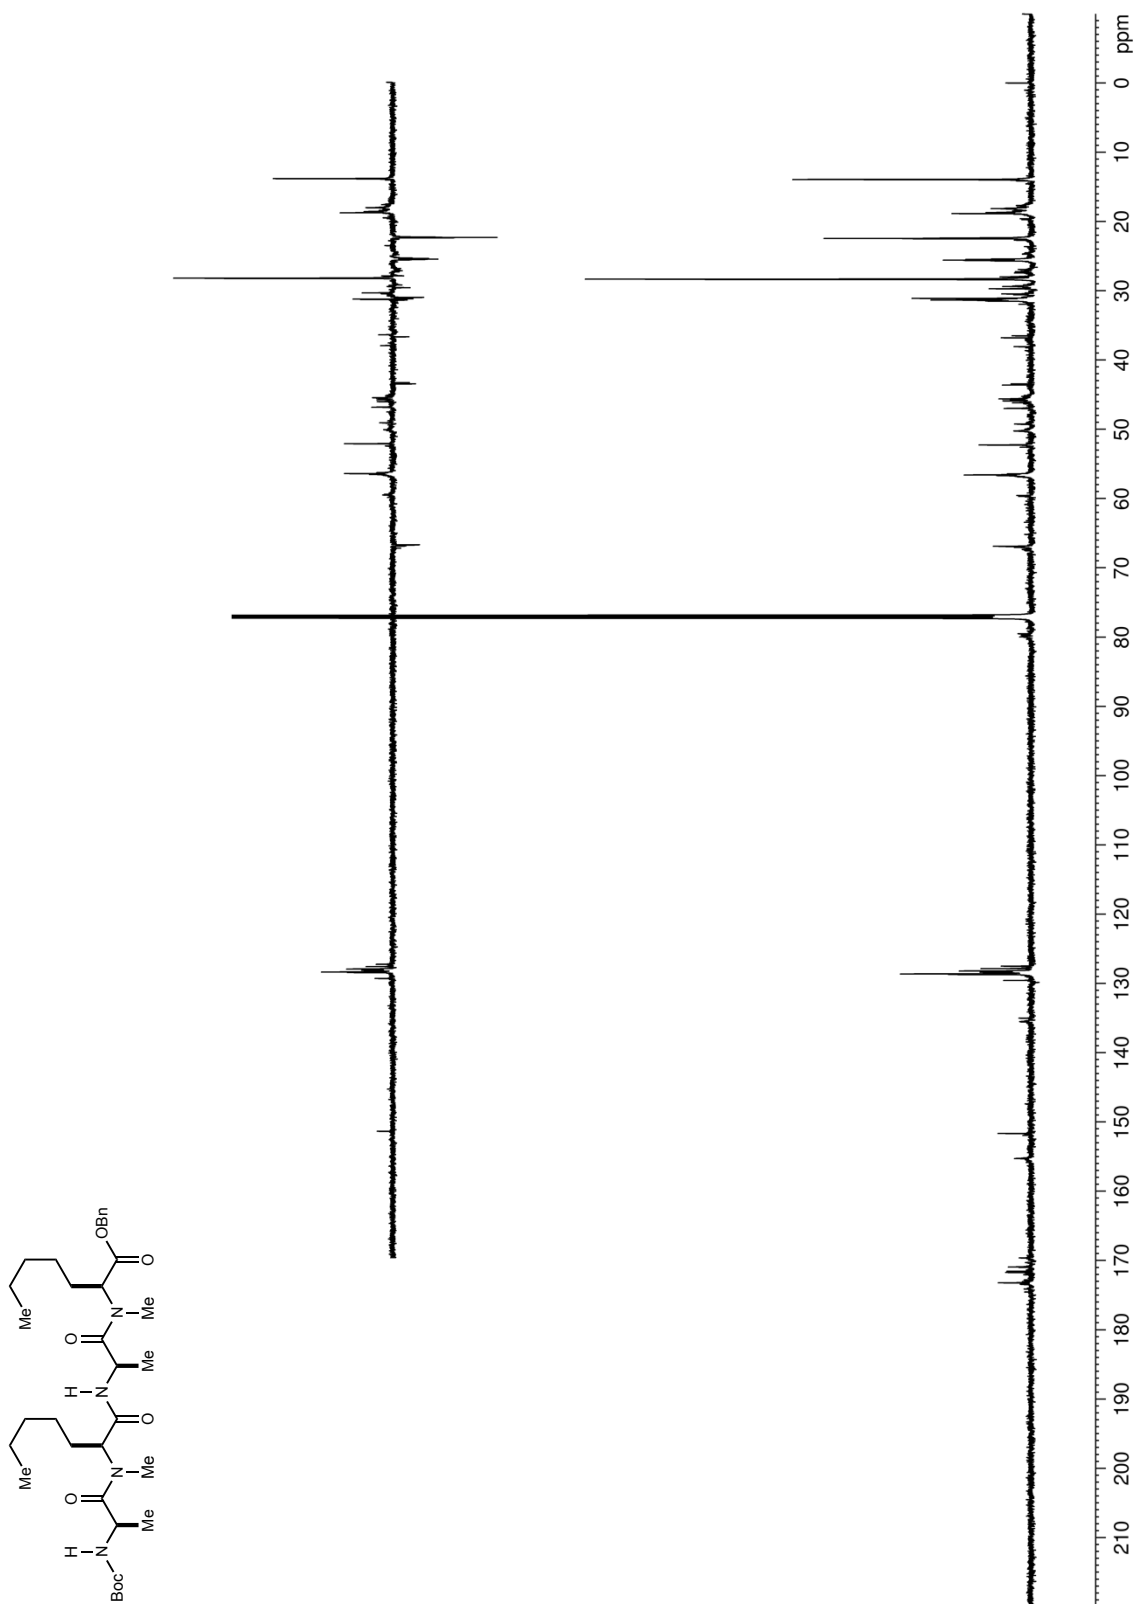

Figure S29.  $^1\text{H}$  NMR (600 MHz,  $\text{CDCl}_3$ ) of T45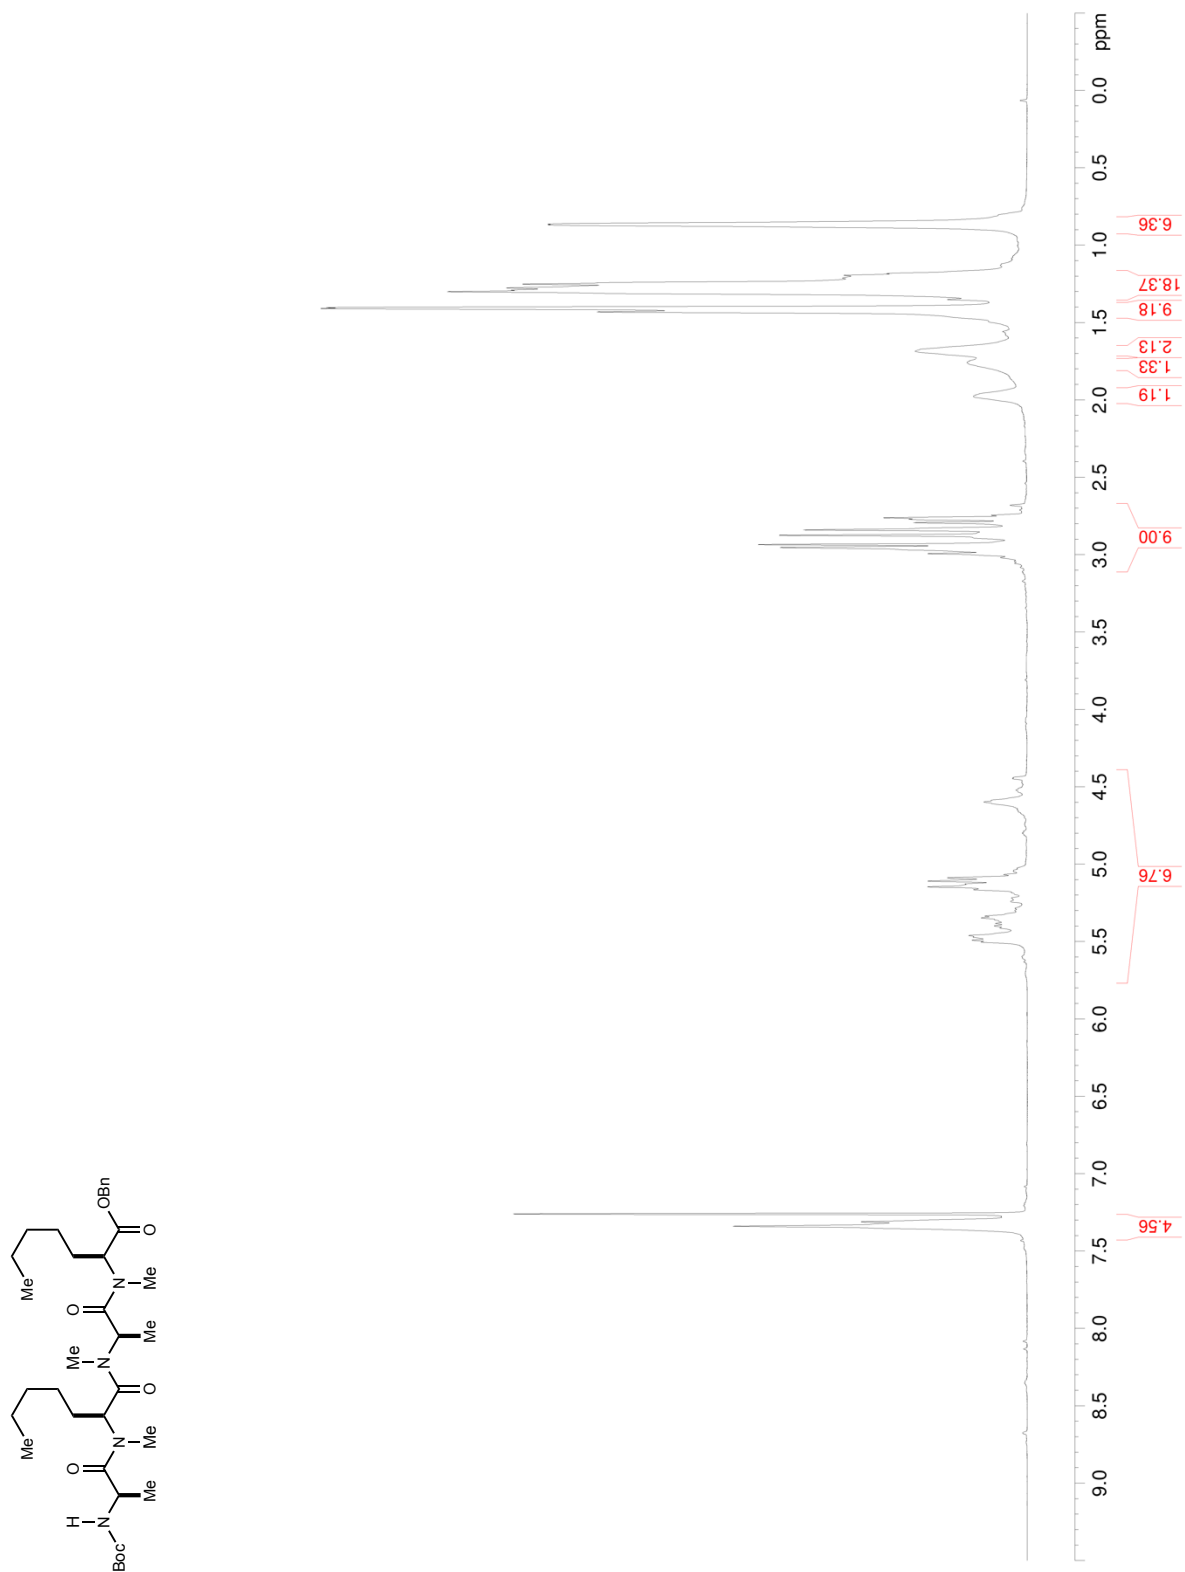

Figure S30.  $^{13}\text{C}$  NMR (150 MHz,  $\text{CDCl}_3$ ) of T45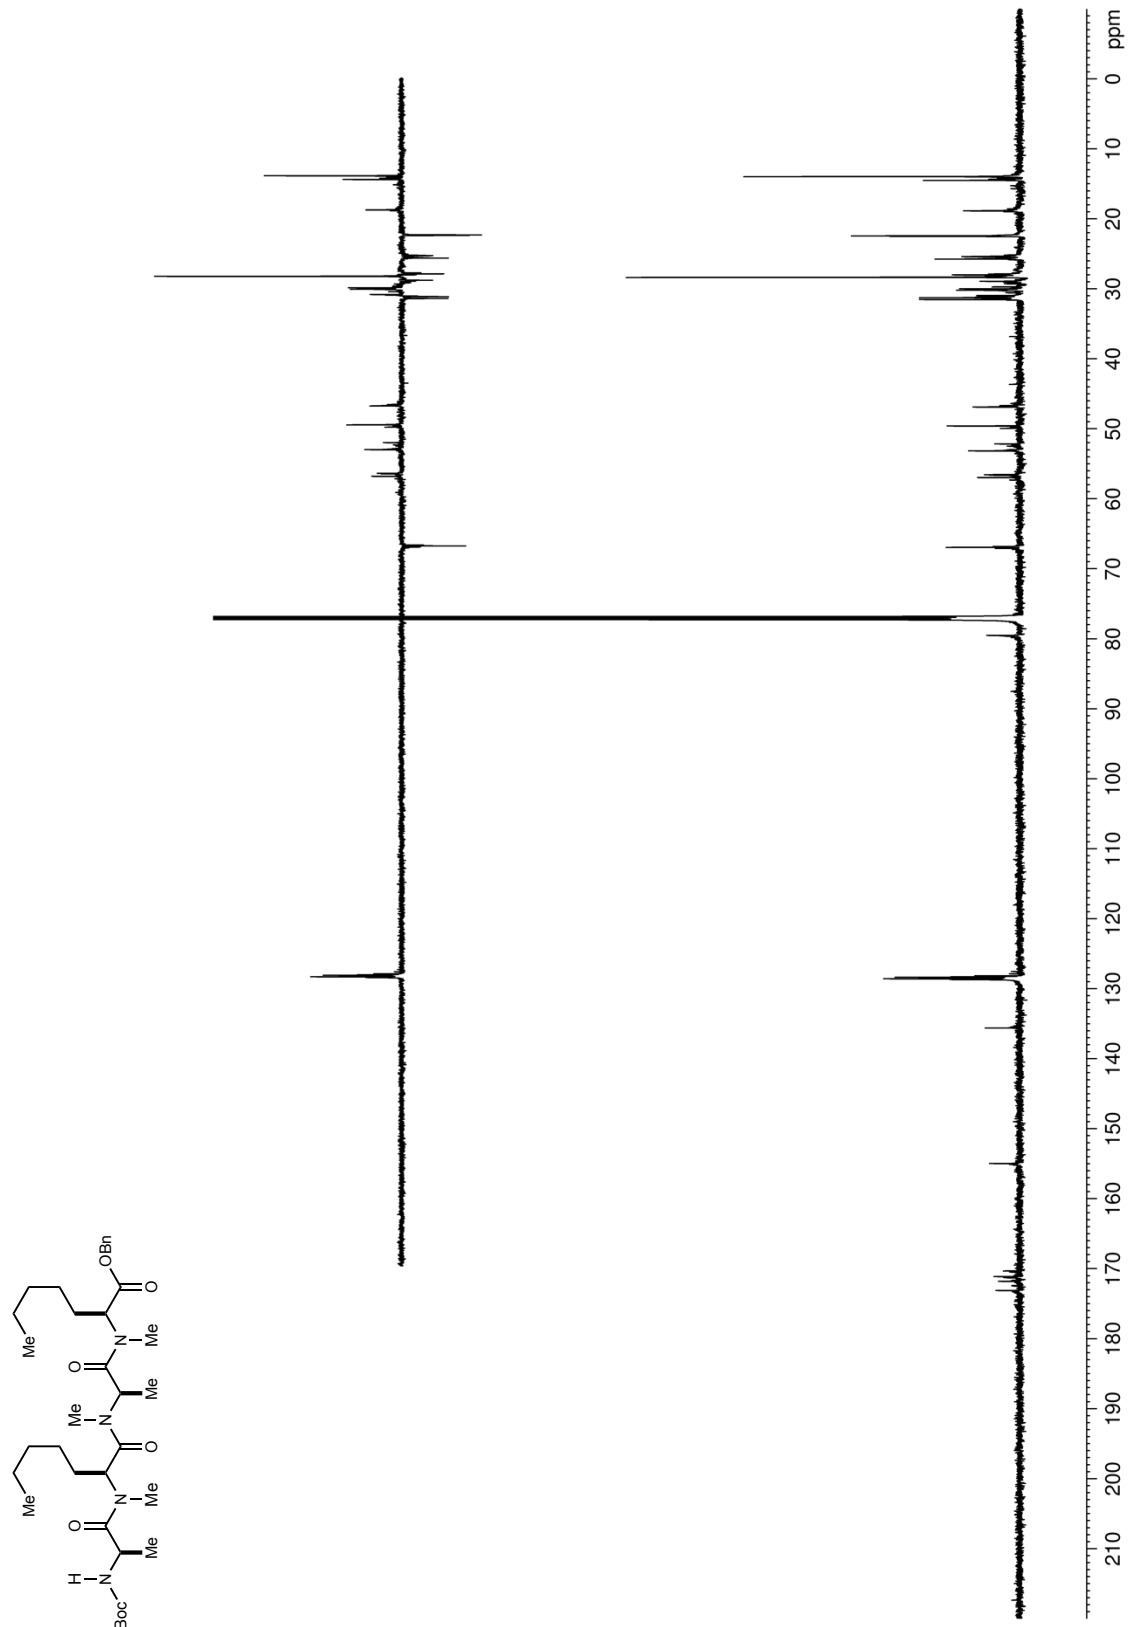

Figure S31.  $^1\text{H}$  NMR (600 MHz,  $\text{CDCl}_3$ ) of T46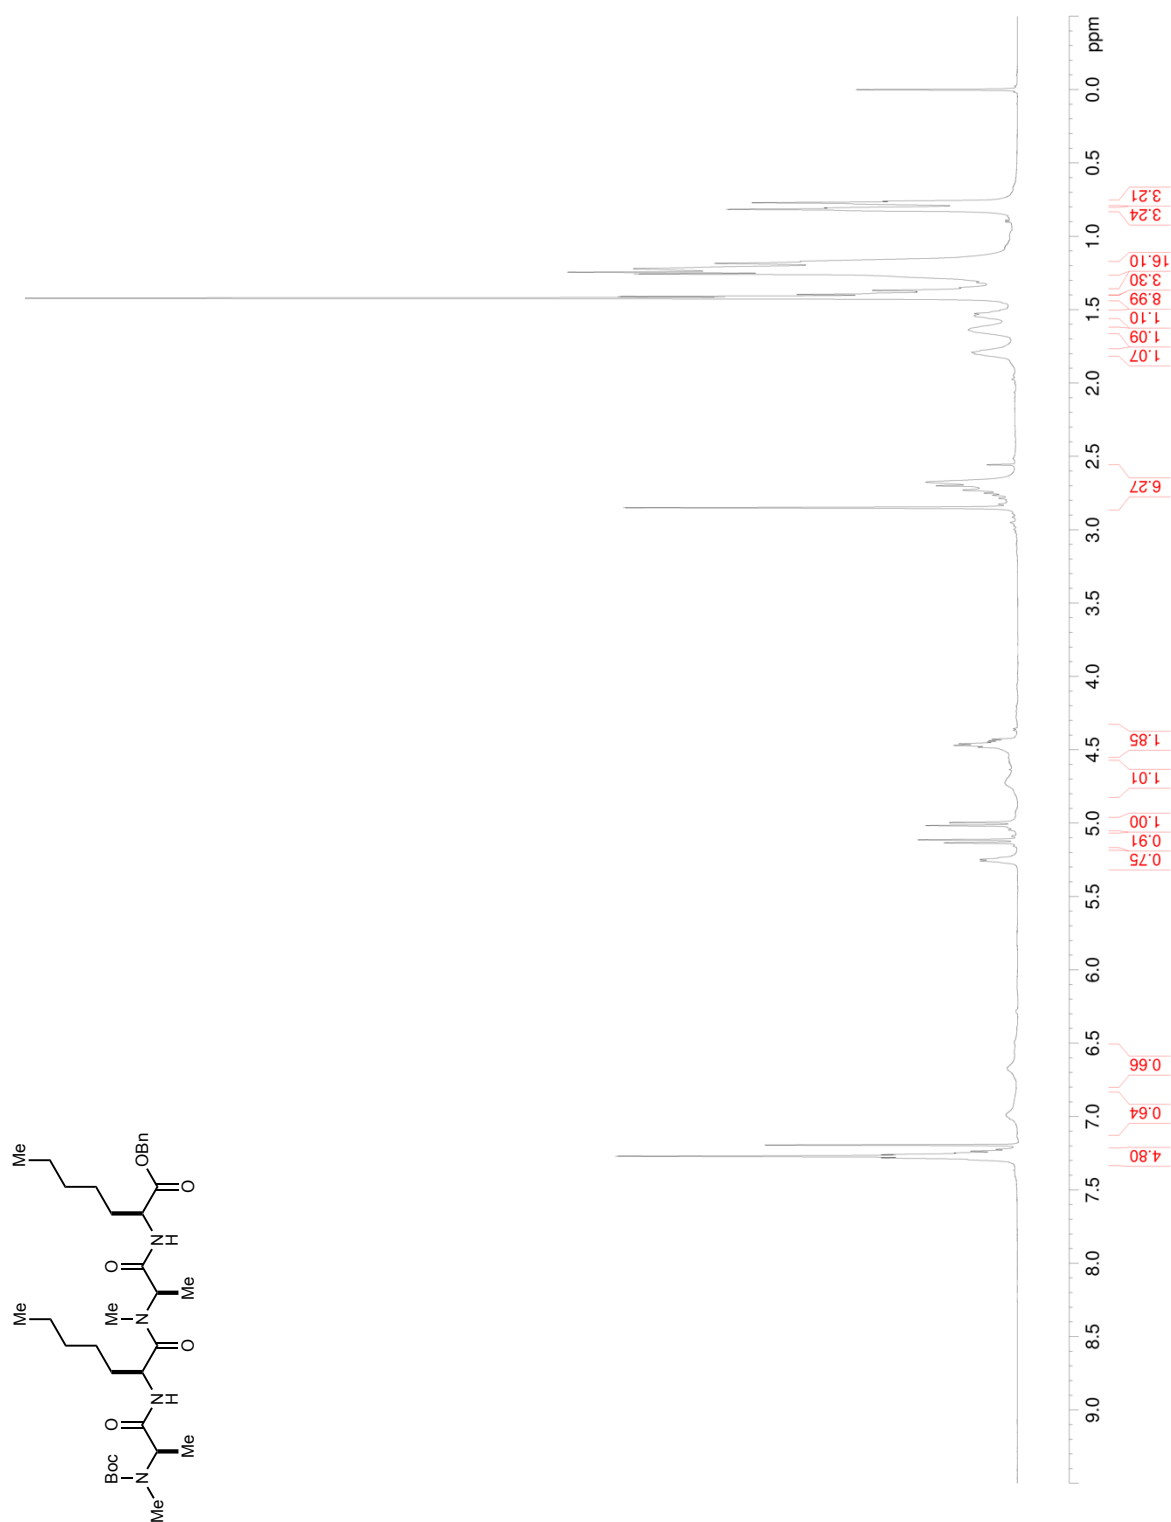

Figure S32.  $^{13}\text{C}$  NMR (150 MHz,  $\text{CDCl}_3$ ) of T46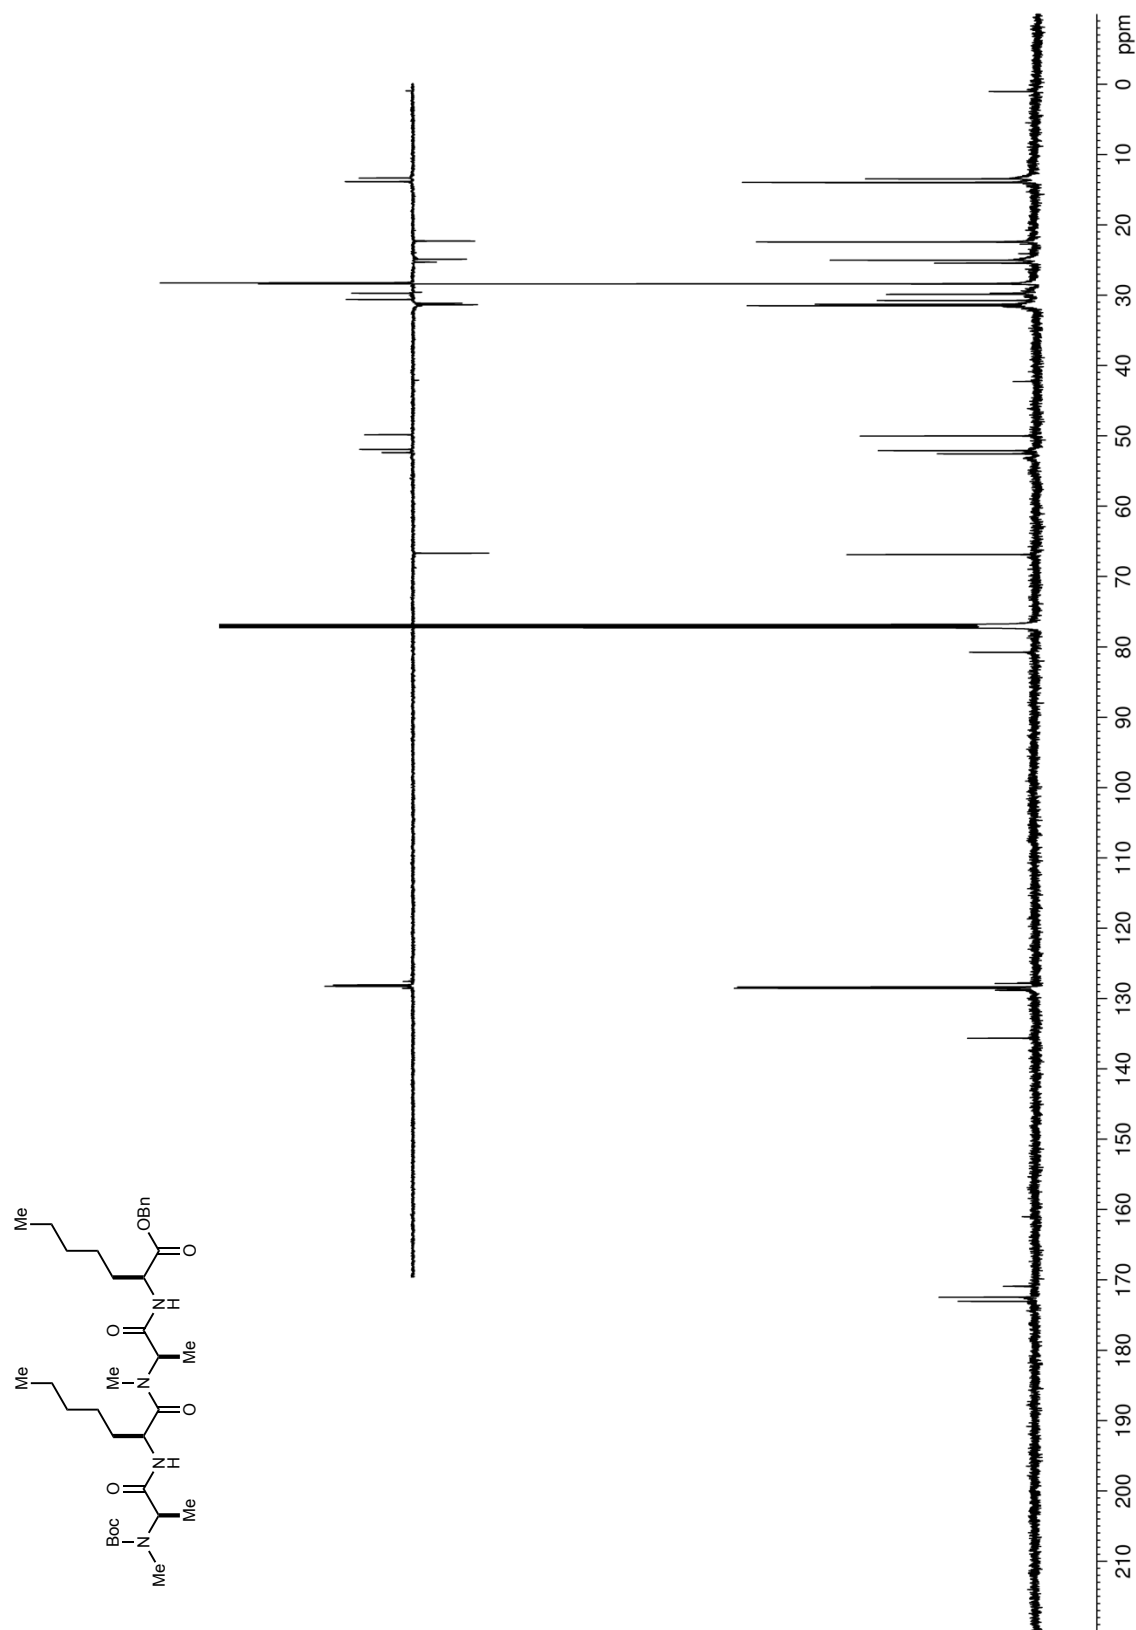



Figure S33.  $^1\text{H}$  NMR (600 MHz,  $\text{CDCl}_3$ ) of T47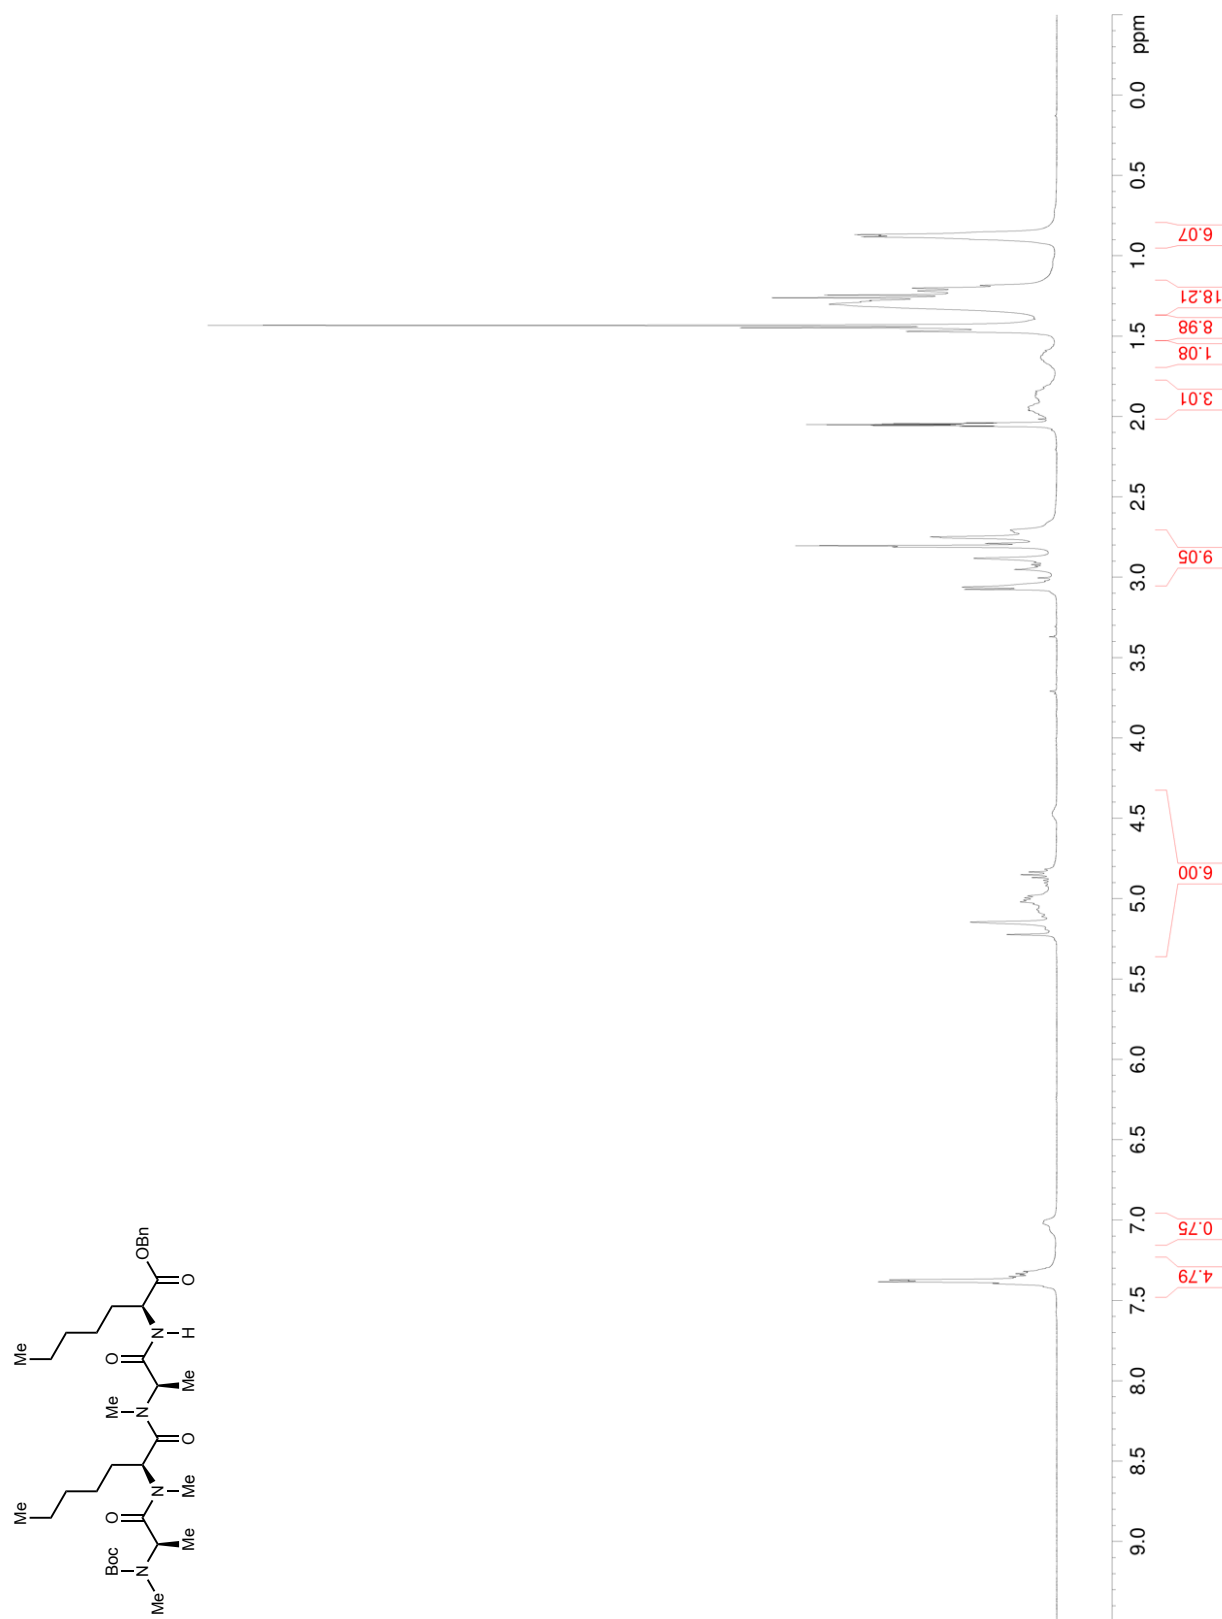

**Figure S34.**  $^{13}\text{C}$  NMR (150 MHz,  $\text{CDCl}_3$ ) of **T47**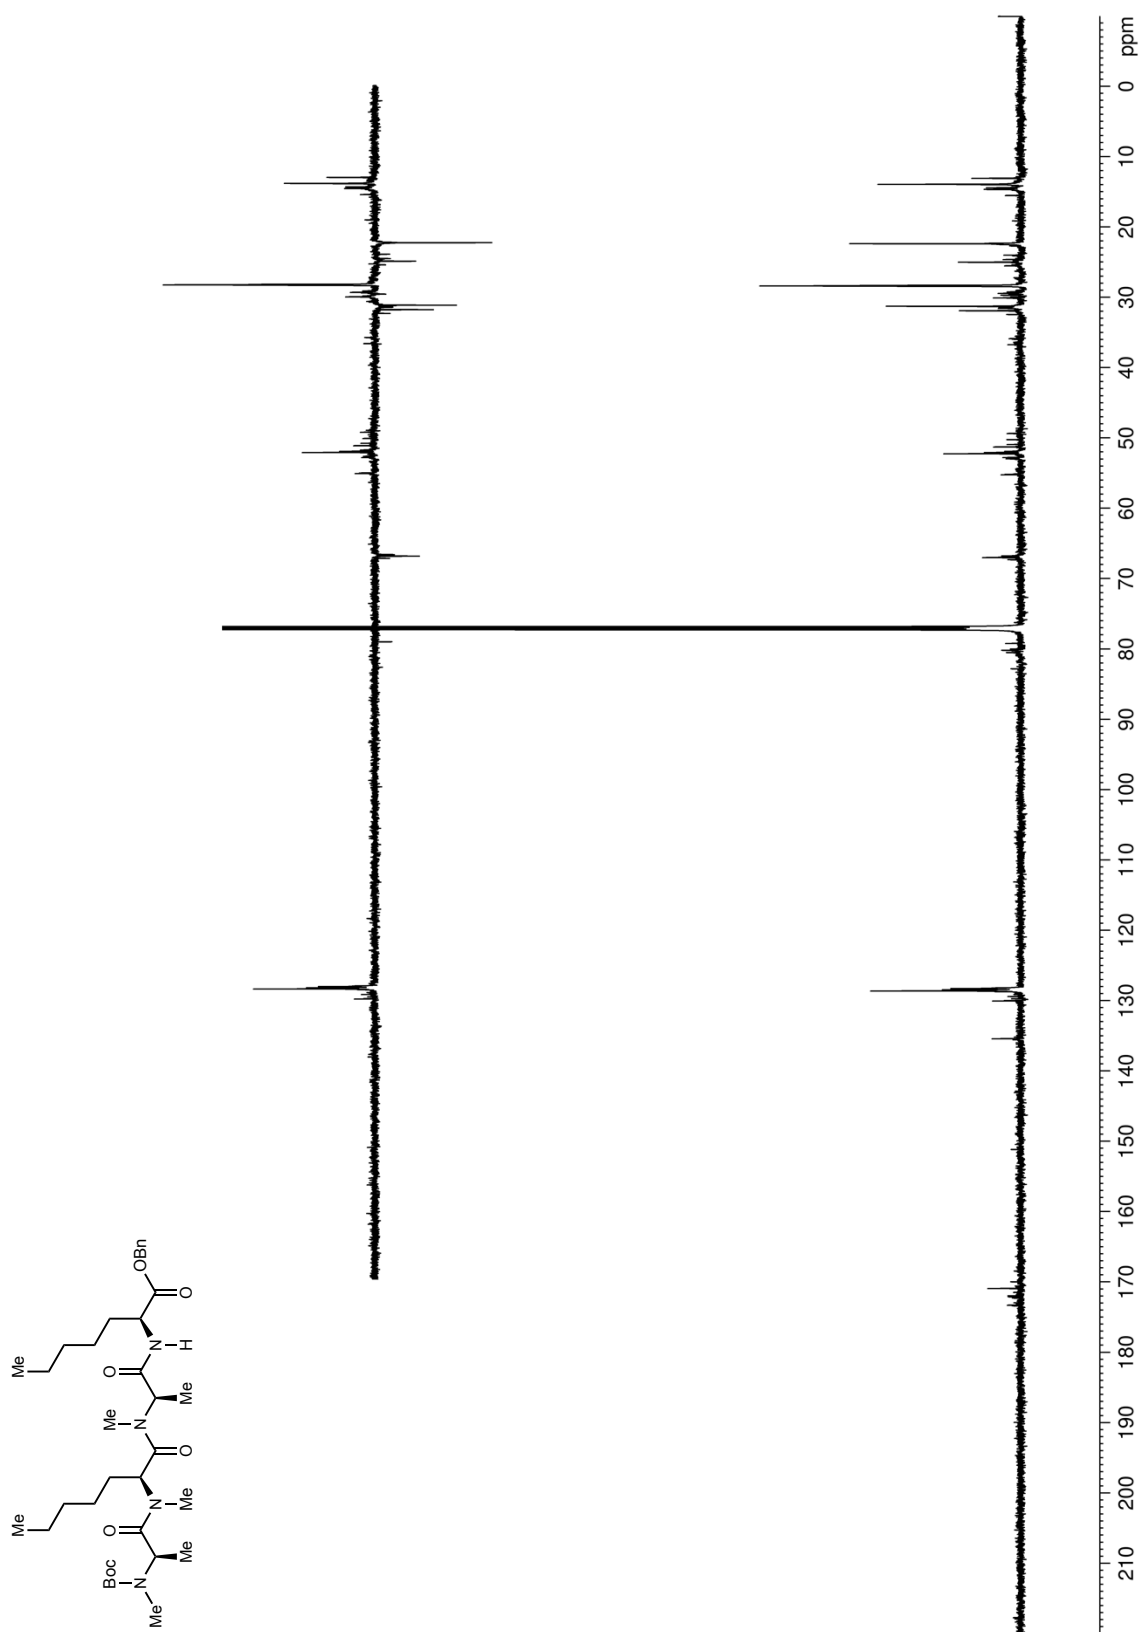

Figure S35.  $^1\text{H}$  NMR (600 MHz,  $\text{CDCl}_3$ ) of **O49**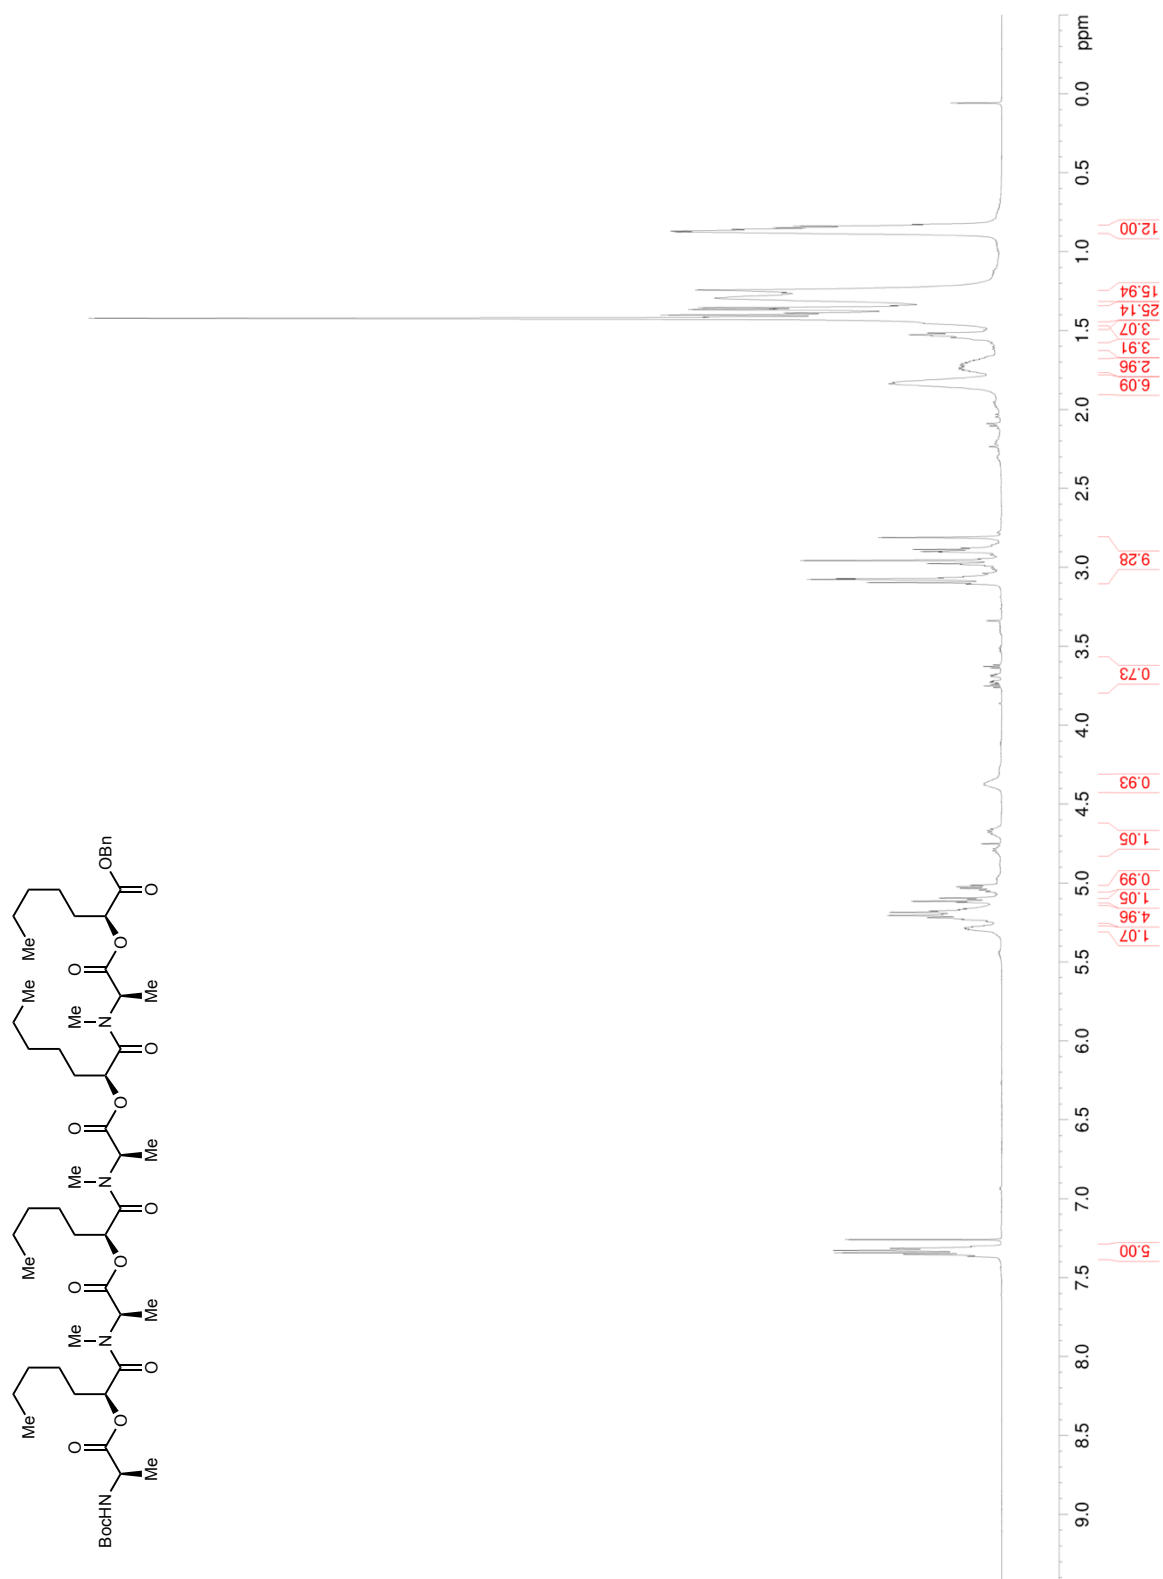

Figure S36.  $^{13}\text{C}$  NMR (150 MHz,  $\text{CDCl}_3$ ) of **O49**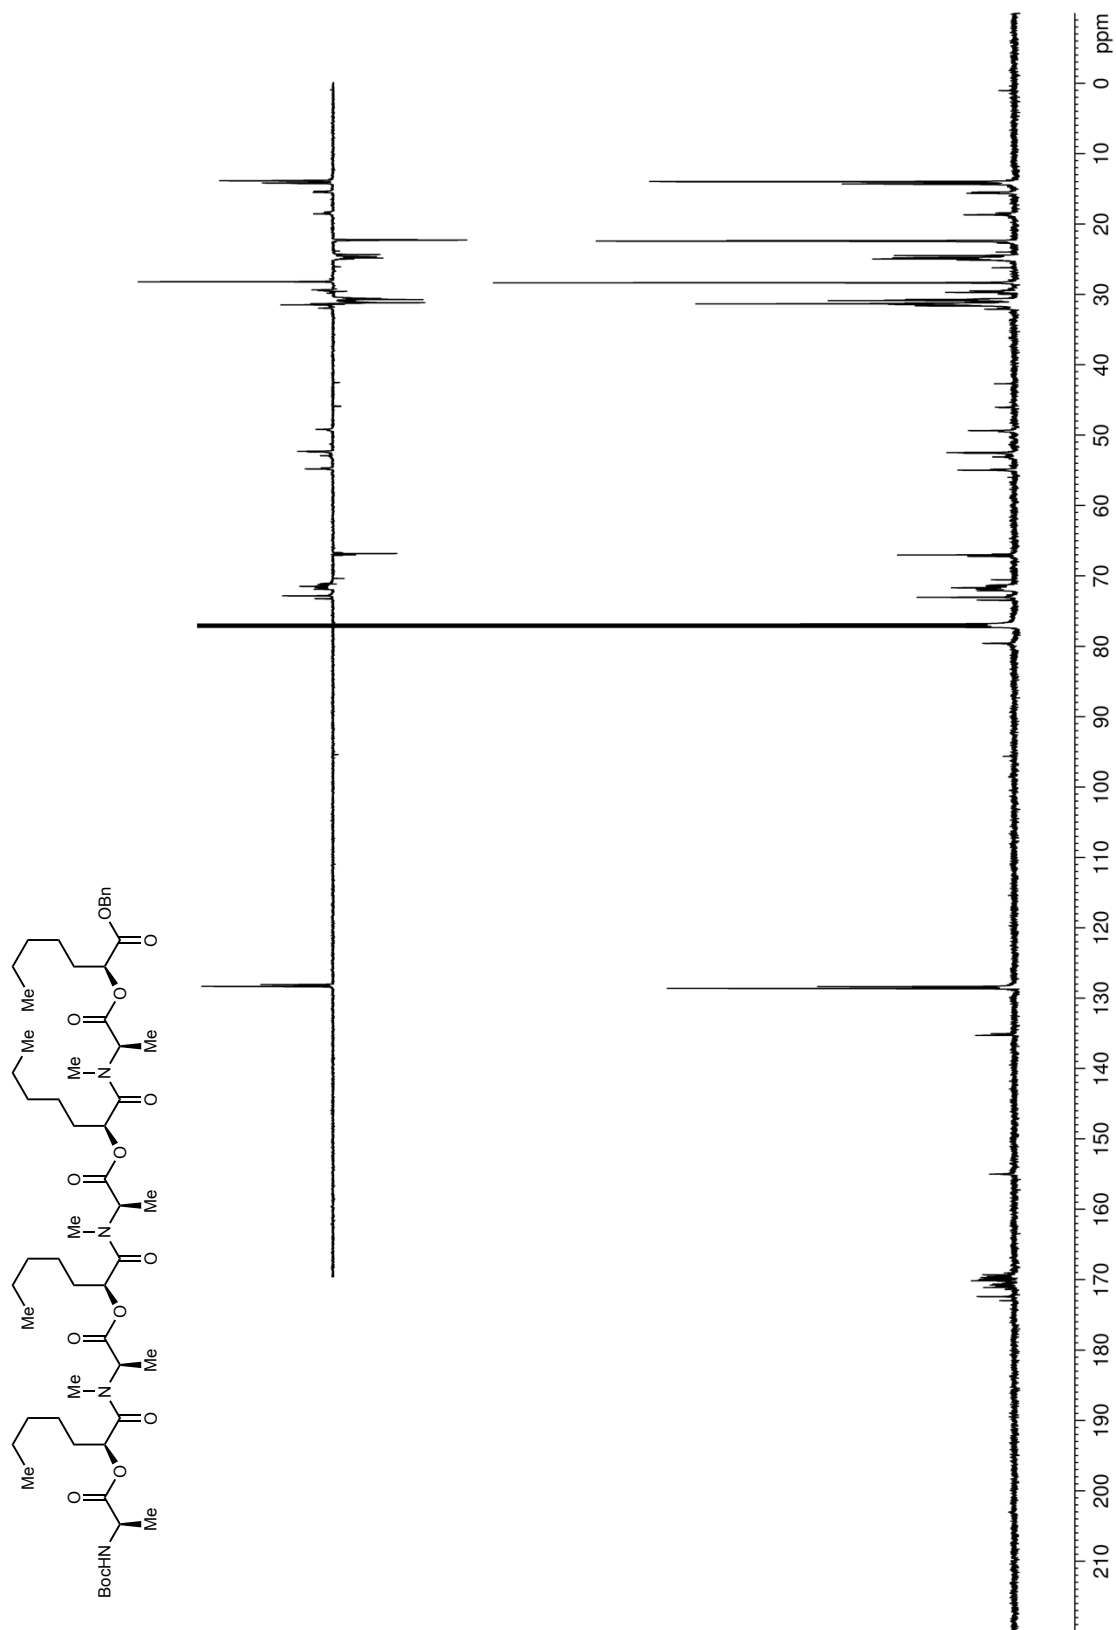

Figure S37.  $^1\text{H}$  NMR (600 MHz,  $\text{CDCl}_3$ ) of **O50**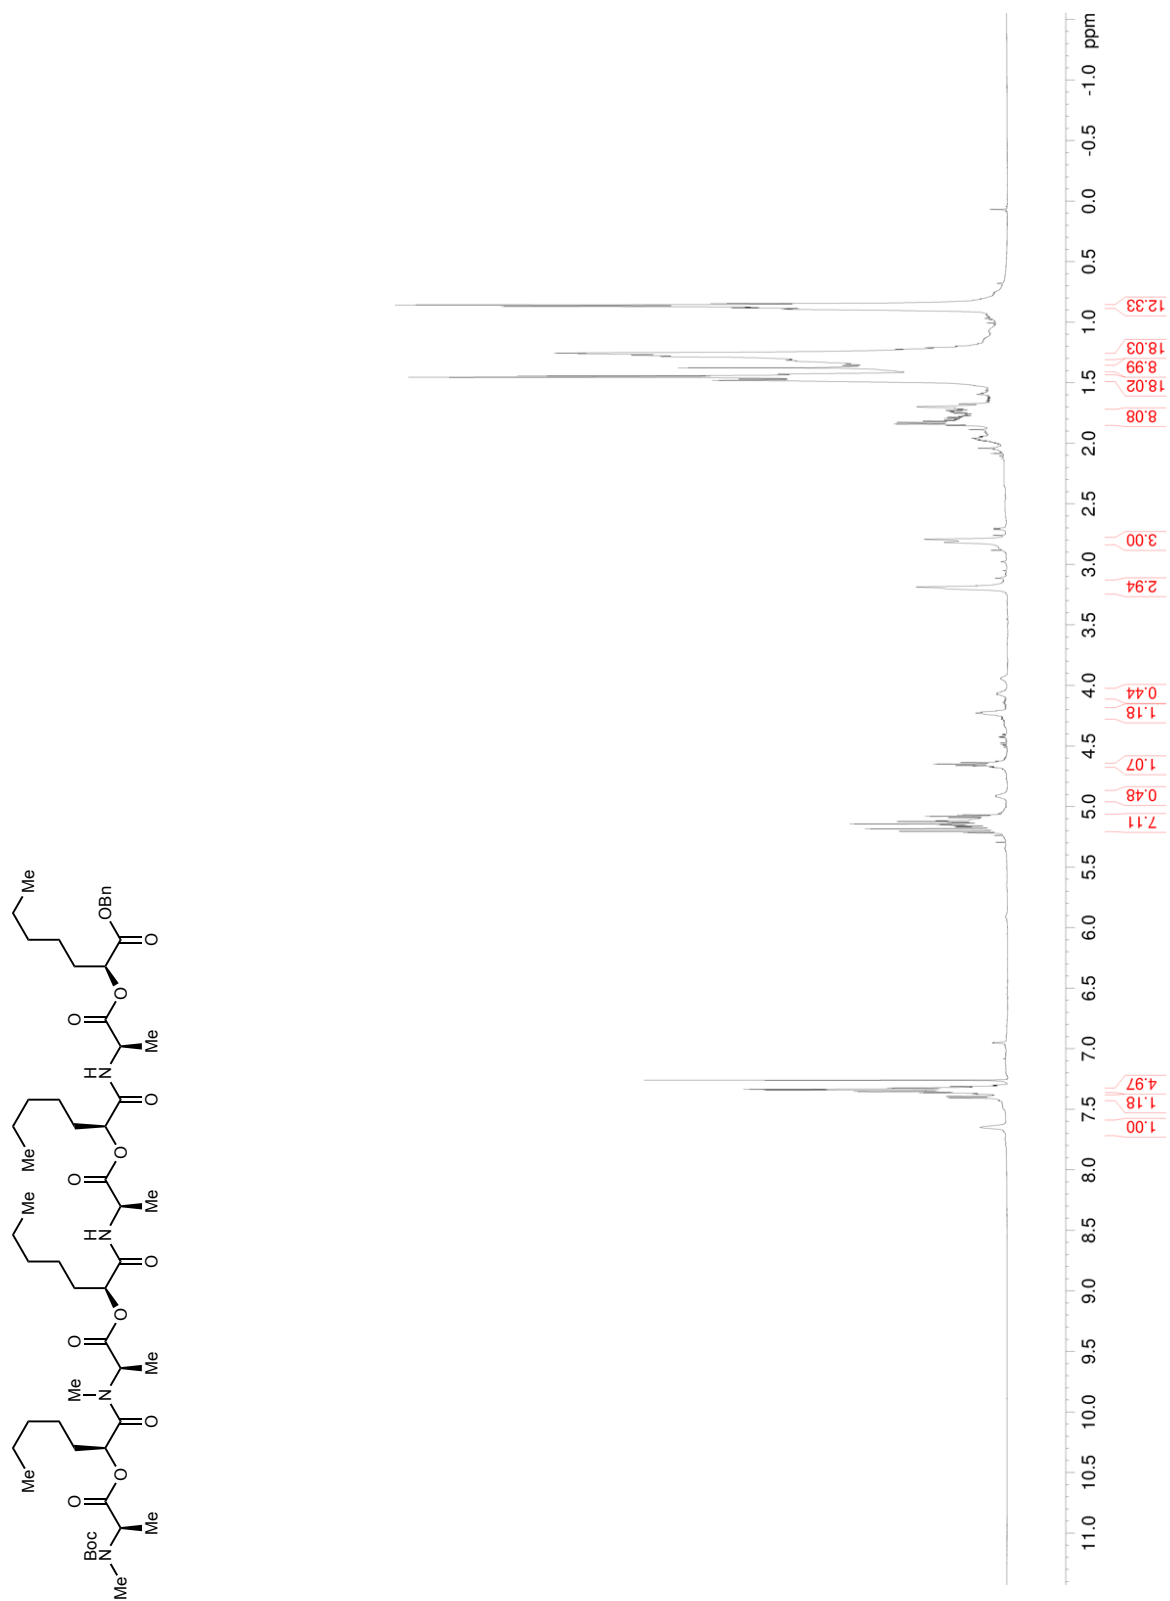

**Figure S38.**  $^{13}\text{C}$  NMR (150 MHz,  $\text{CDCl}_3$ ) of **O50**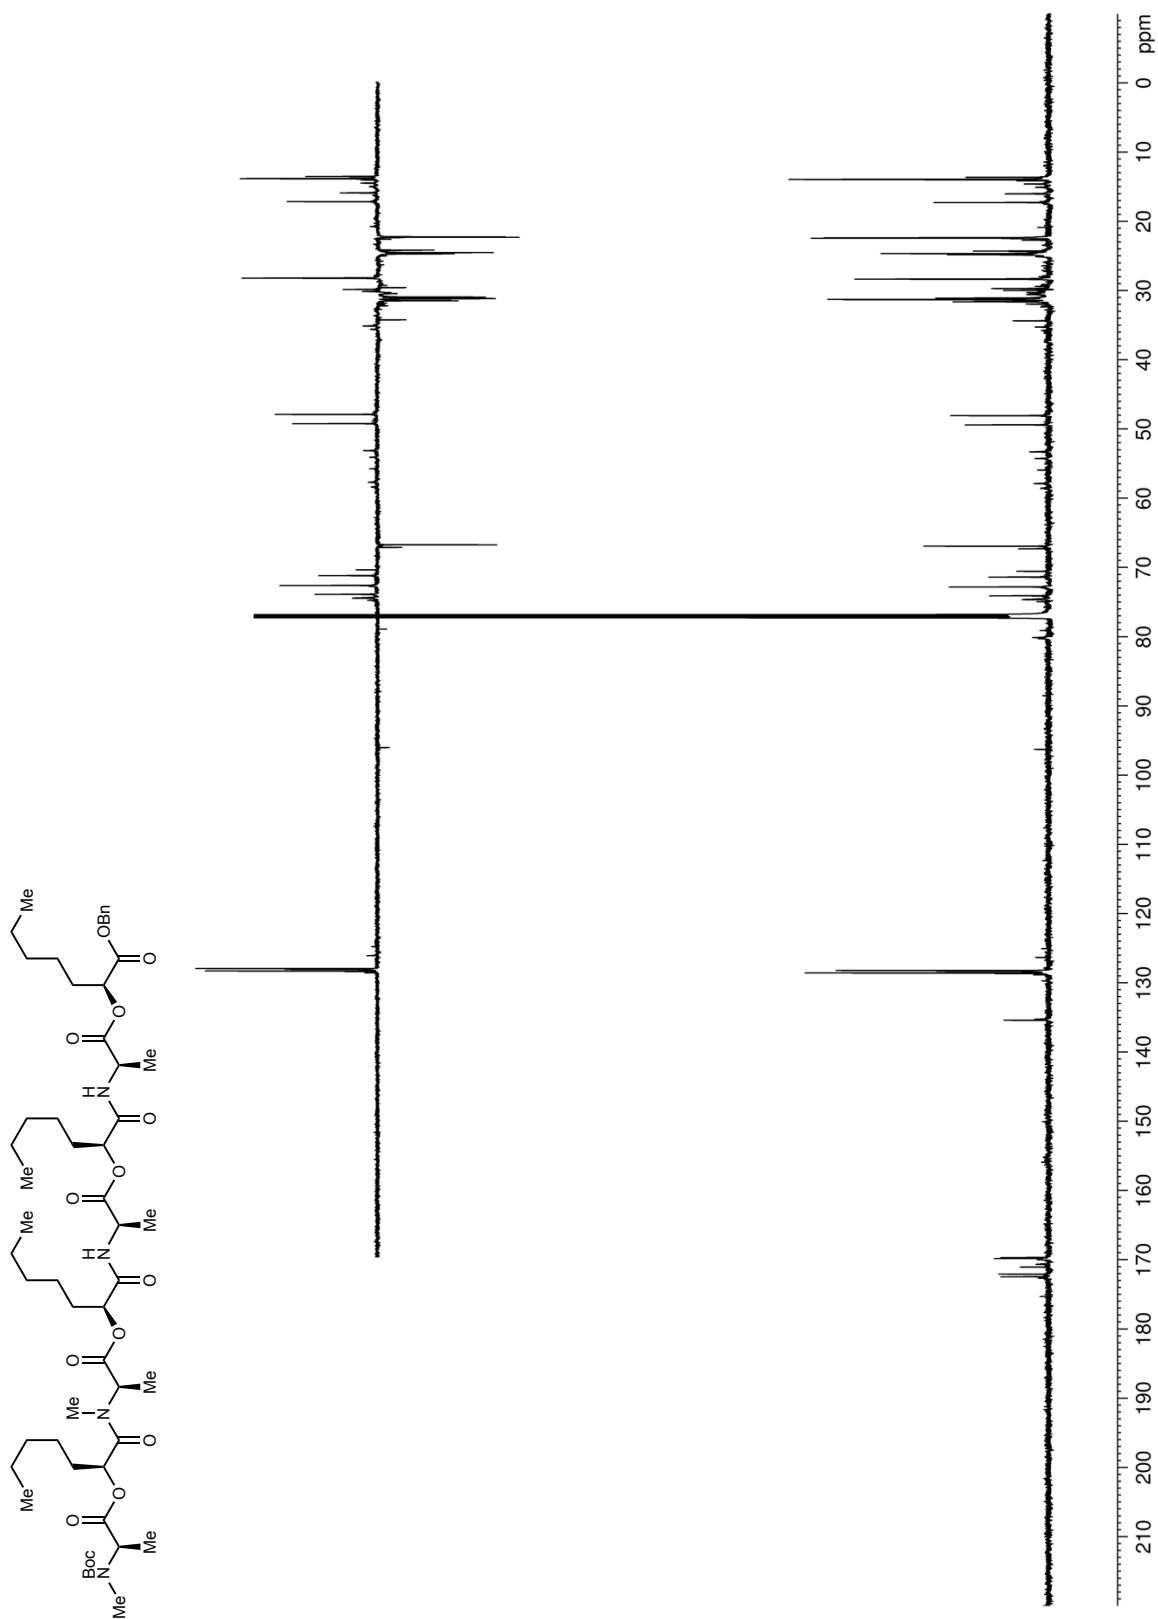

Figure S39.  $^1\text{H}$  NMR (600 MHz,  $\text{CDCl}_3$ ) of H51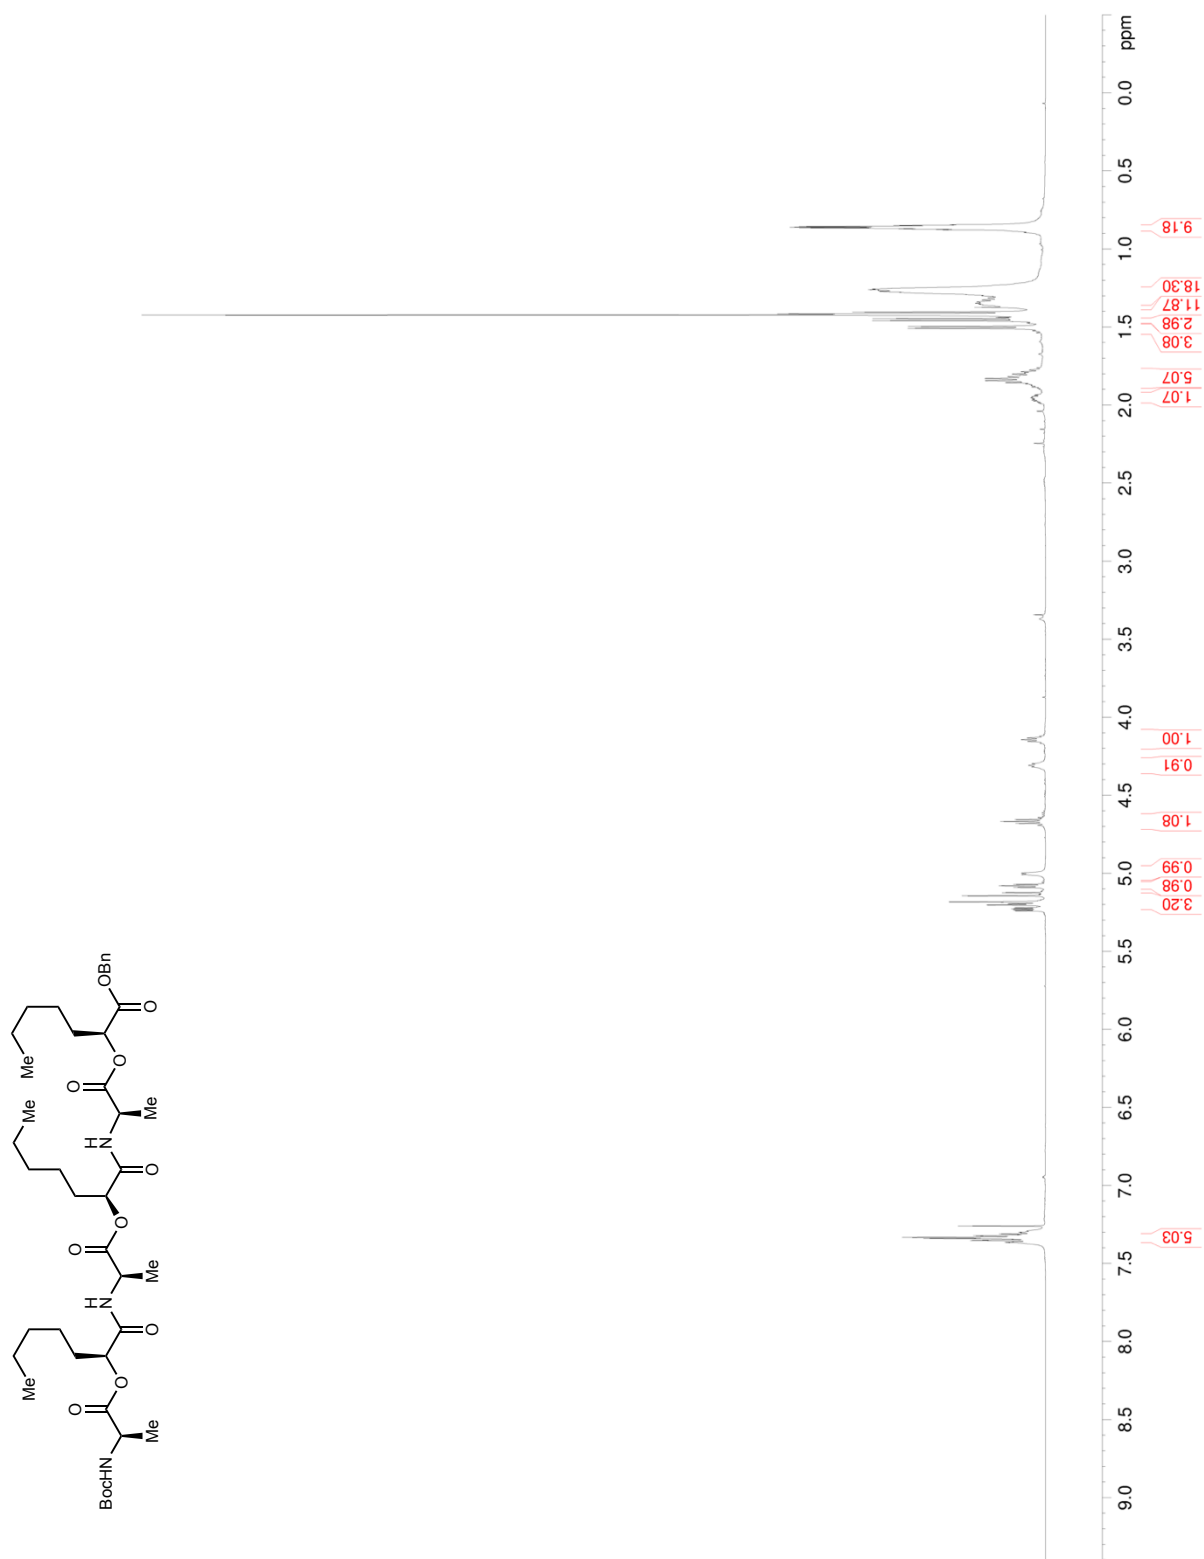

Figure S40.  $^{13}\text{C}$  NMR (150 MHz,  $\text{CDCl}_3$ ) of H51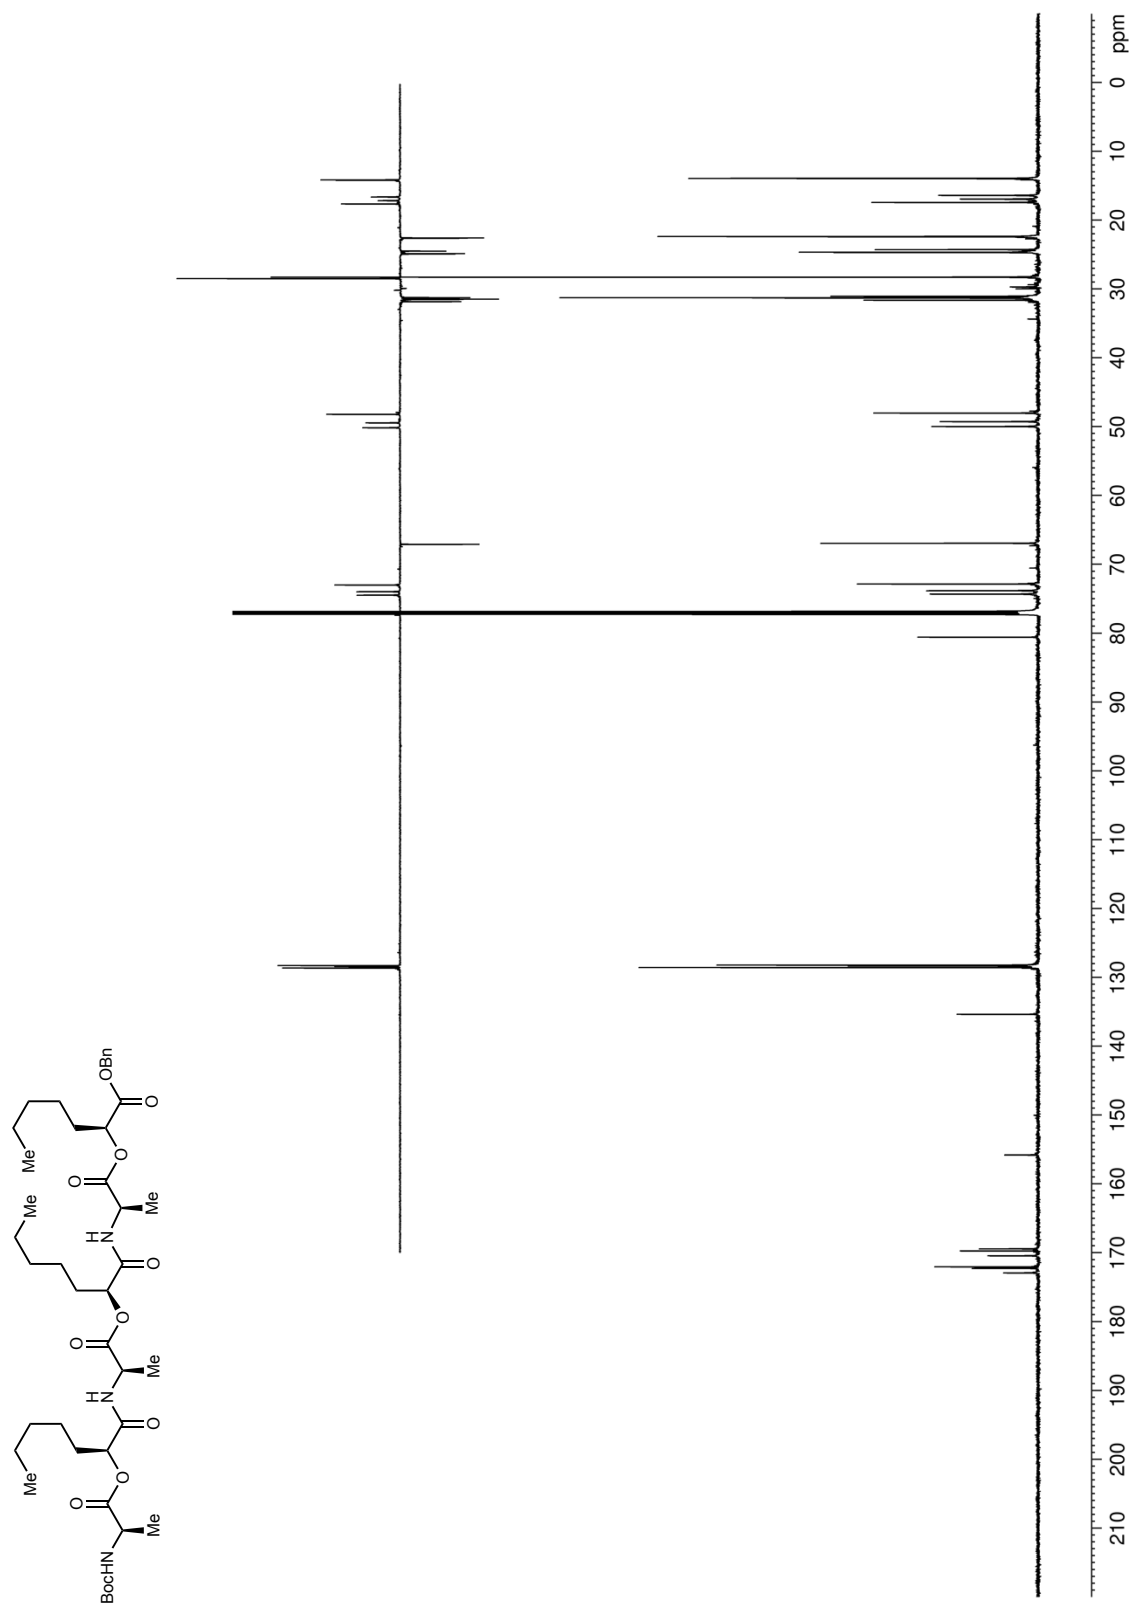



Figure S41.  $^1\text{H}$  NMR (600 MHz,  $\text{CDCl}_3$ ) of **O52**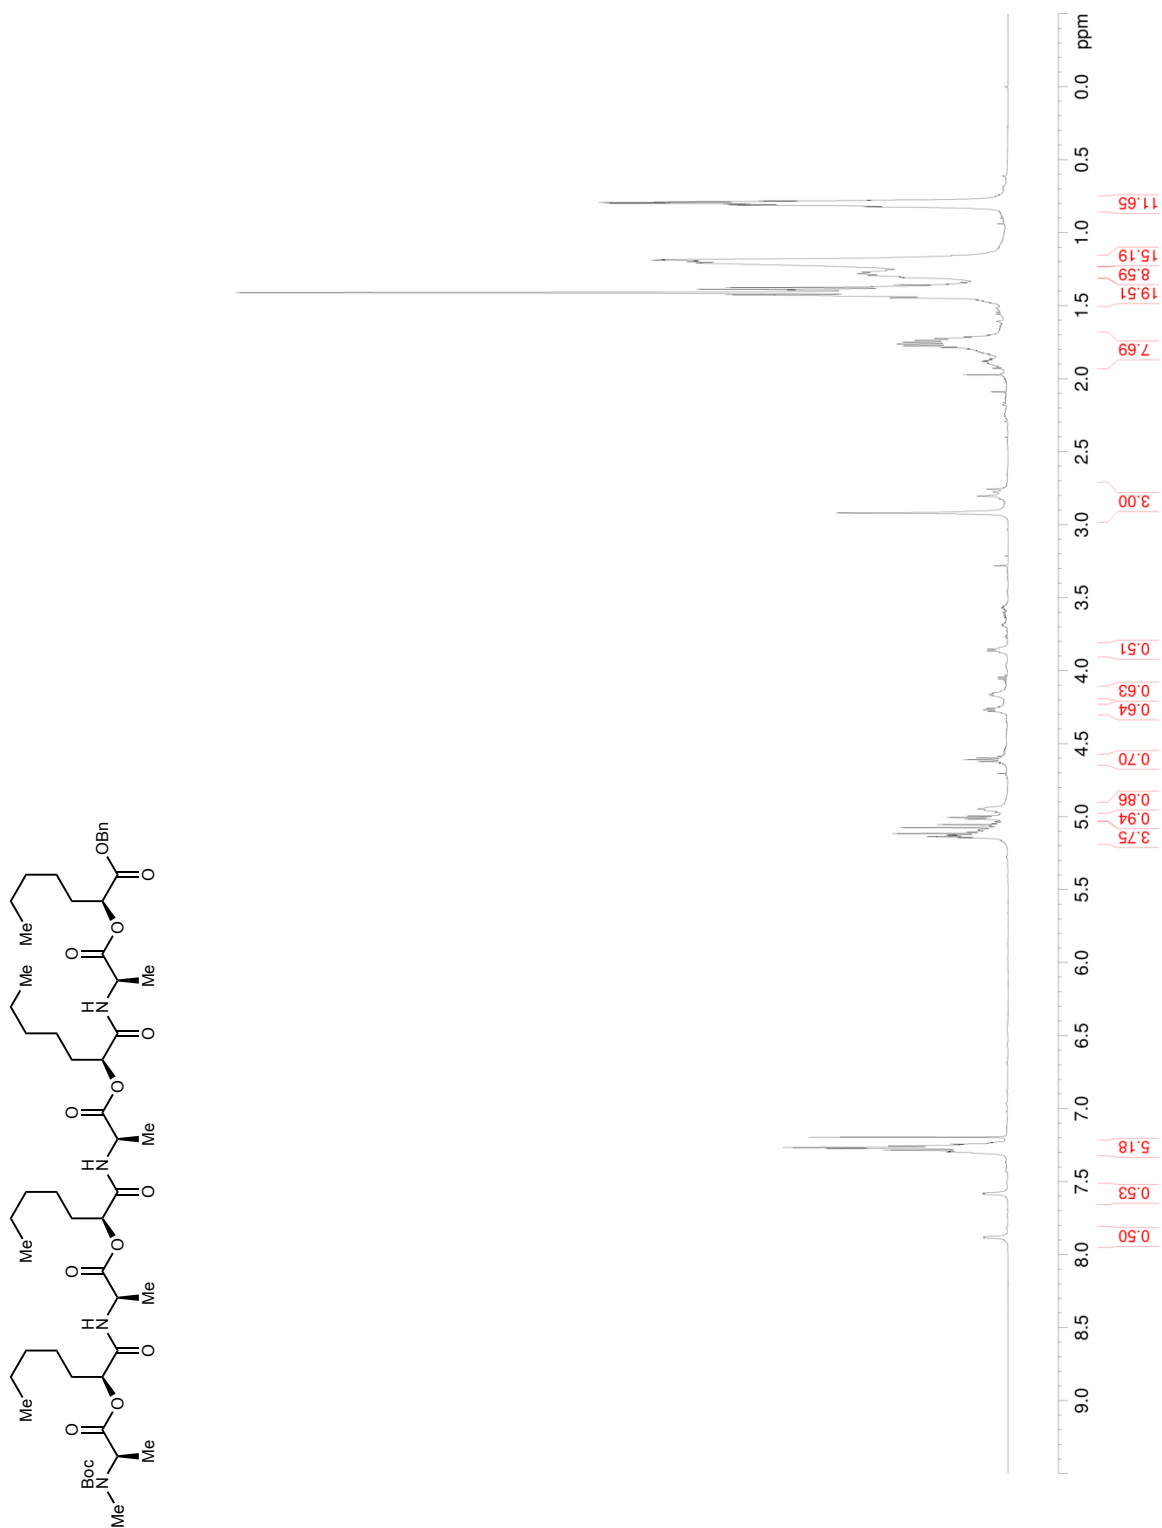

Figure S42.  $^{13}\text{C}$  NMR (150 MHz,  $\text{CDCl}_3$ ) of **O52**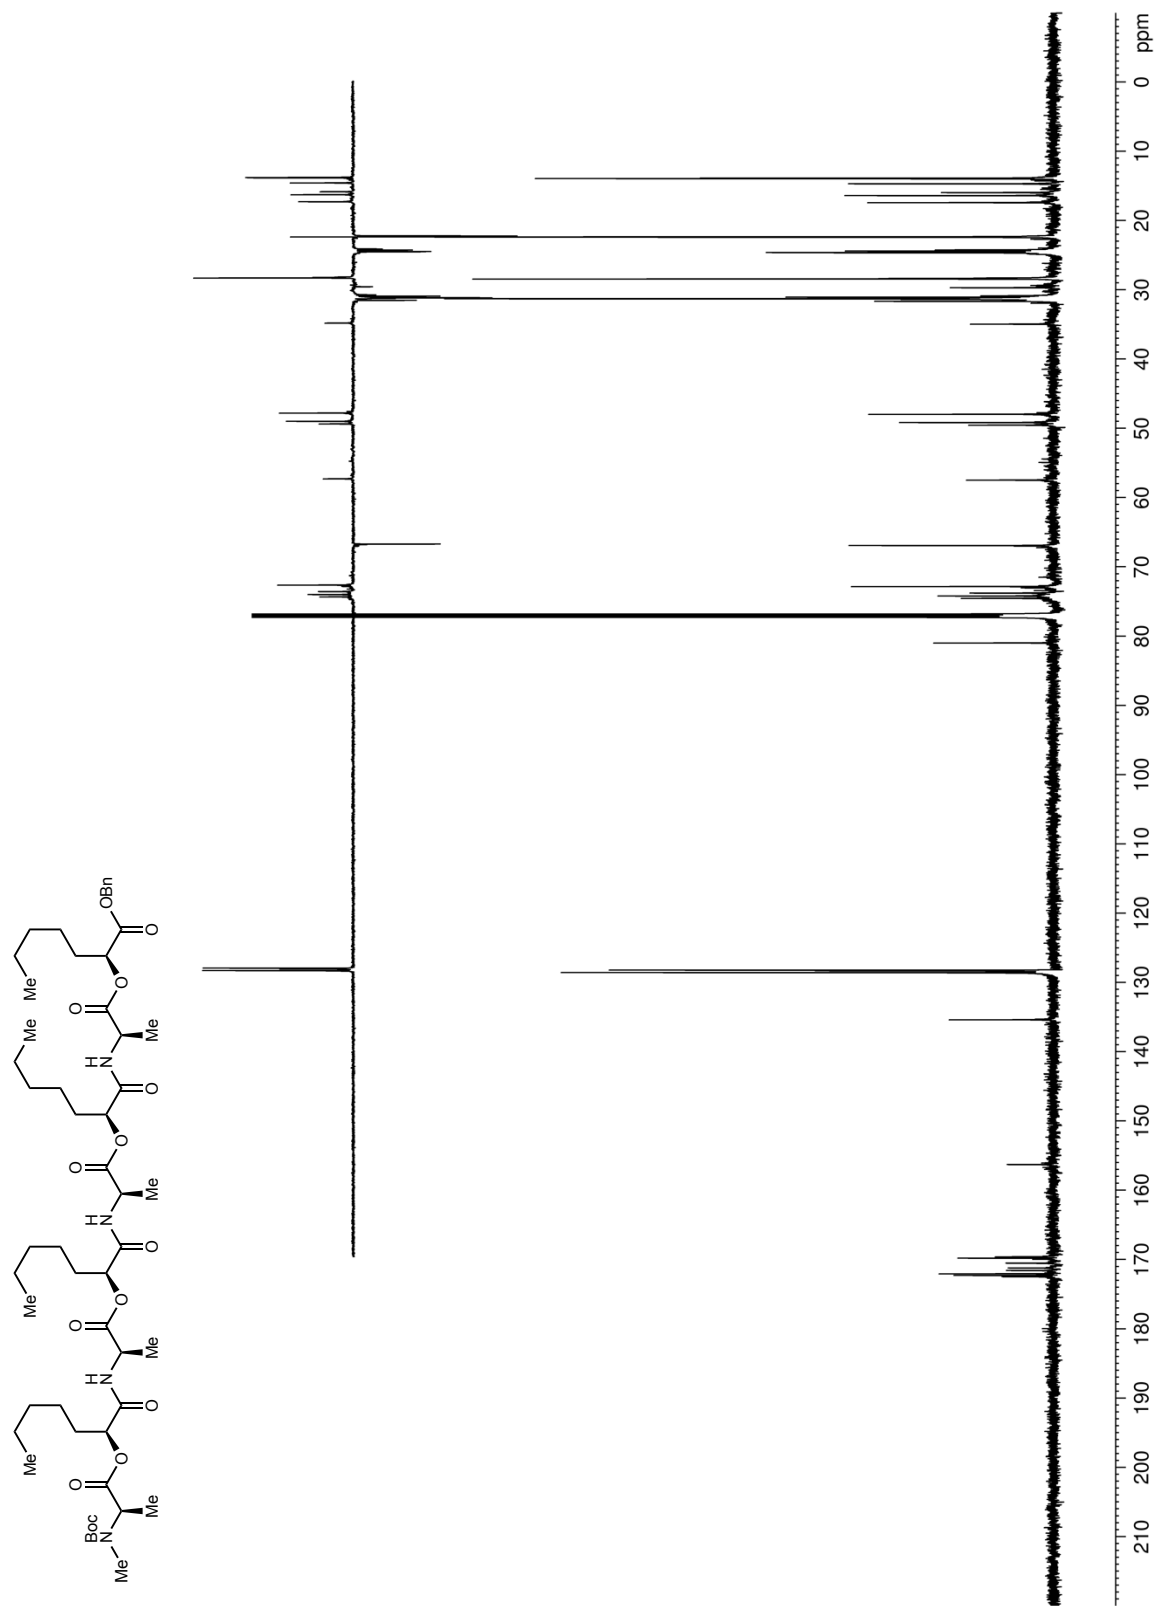

Figure S43.  $^1\text{H}$  NMR (600 MHz,  $\text{CDCl}_3$ ) of **O54**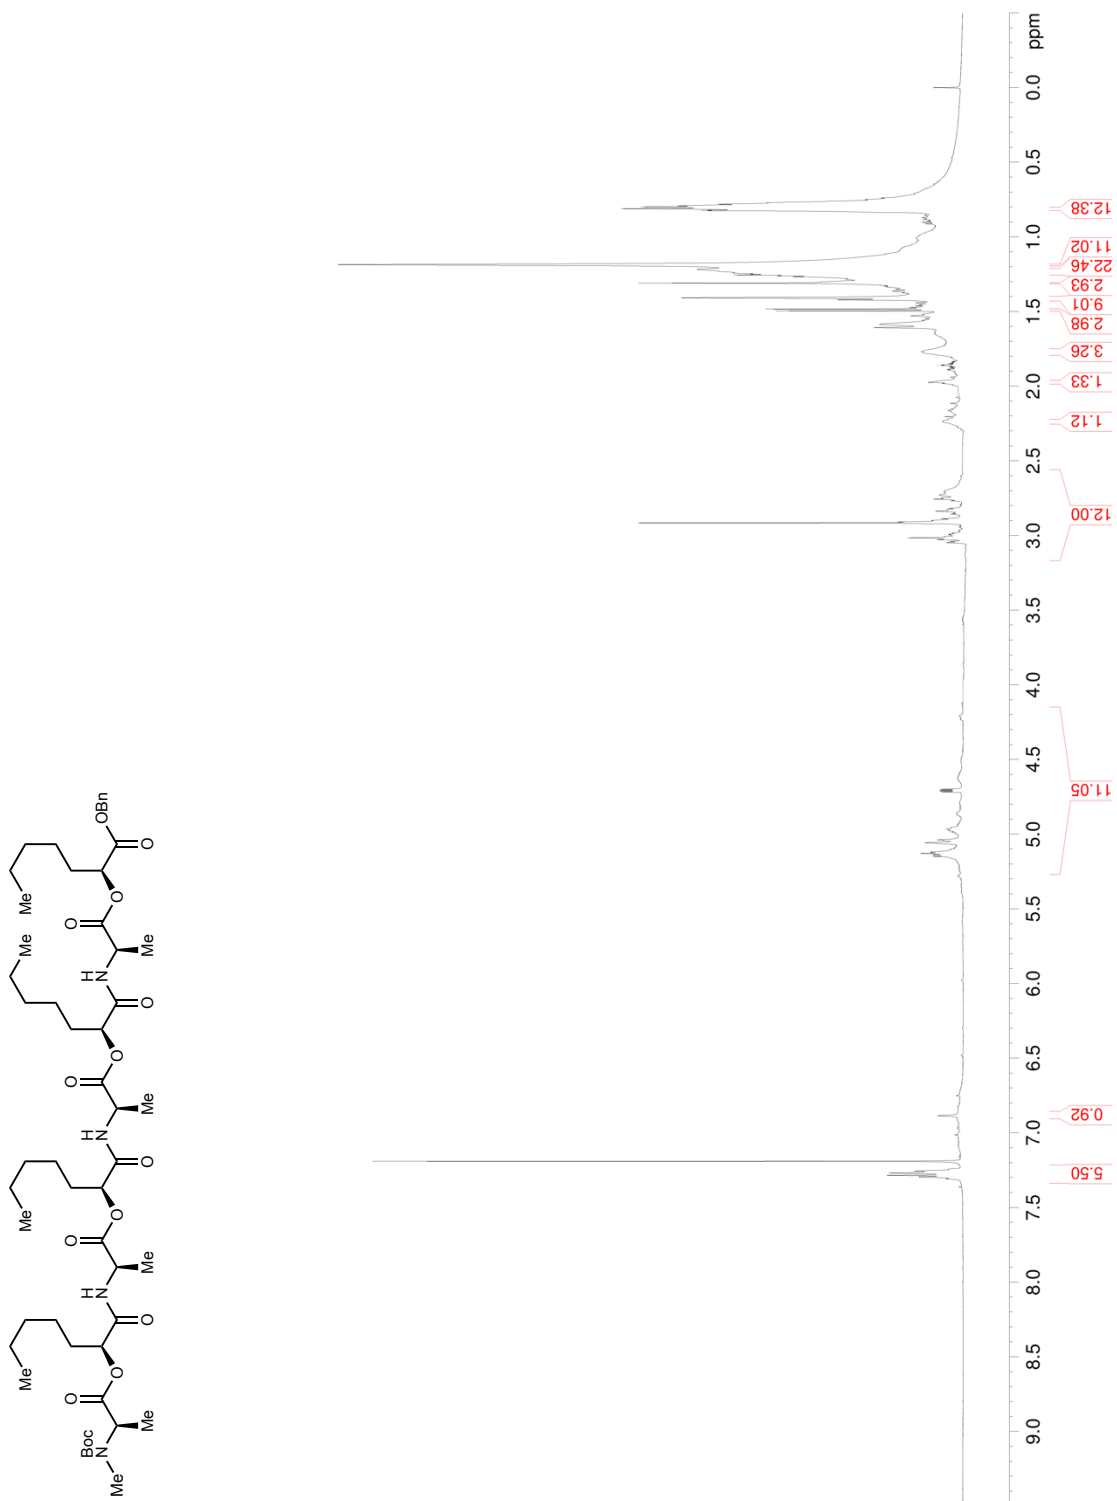

**Figure S44.**  $^{13}\text{C}$  NMR (150 MHz,  $\text{CDCl}_3$ ) of **O54**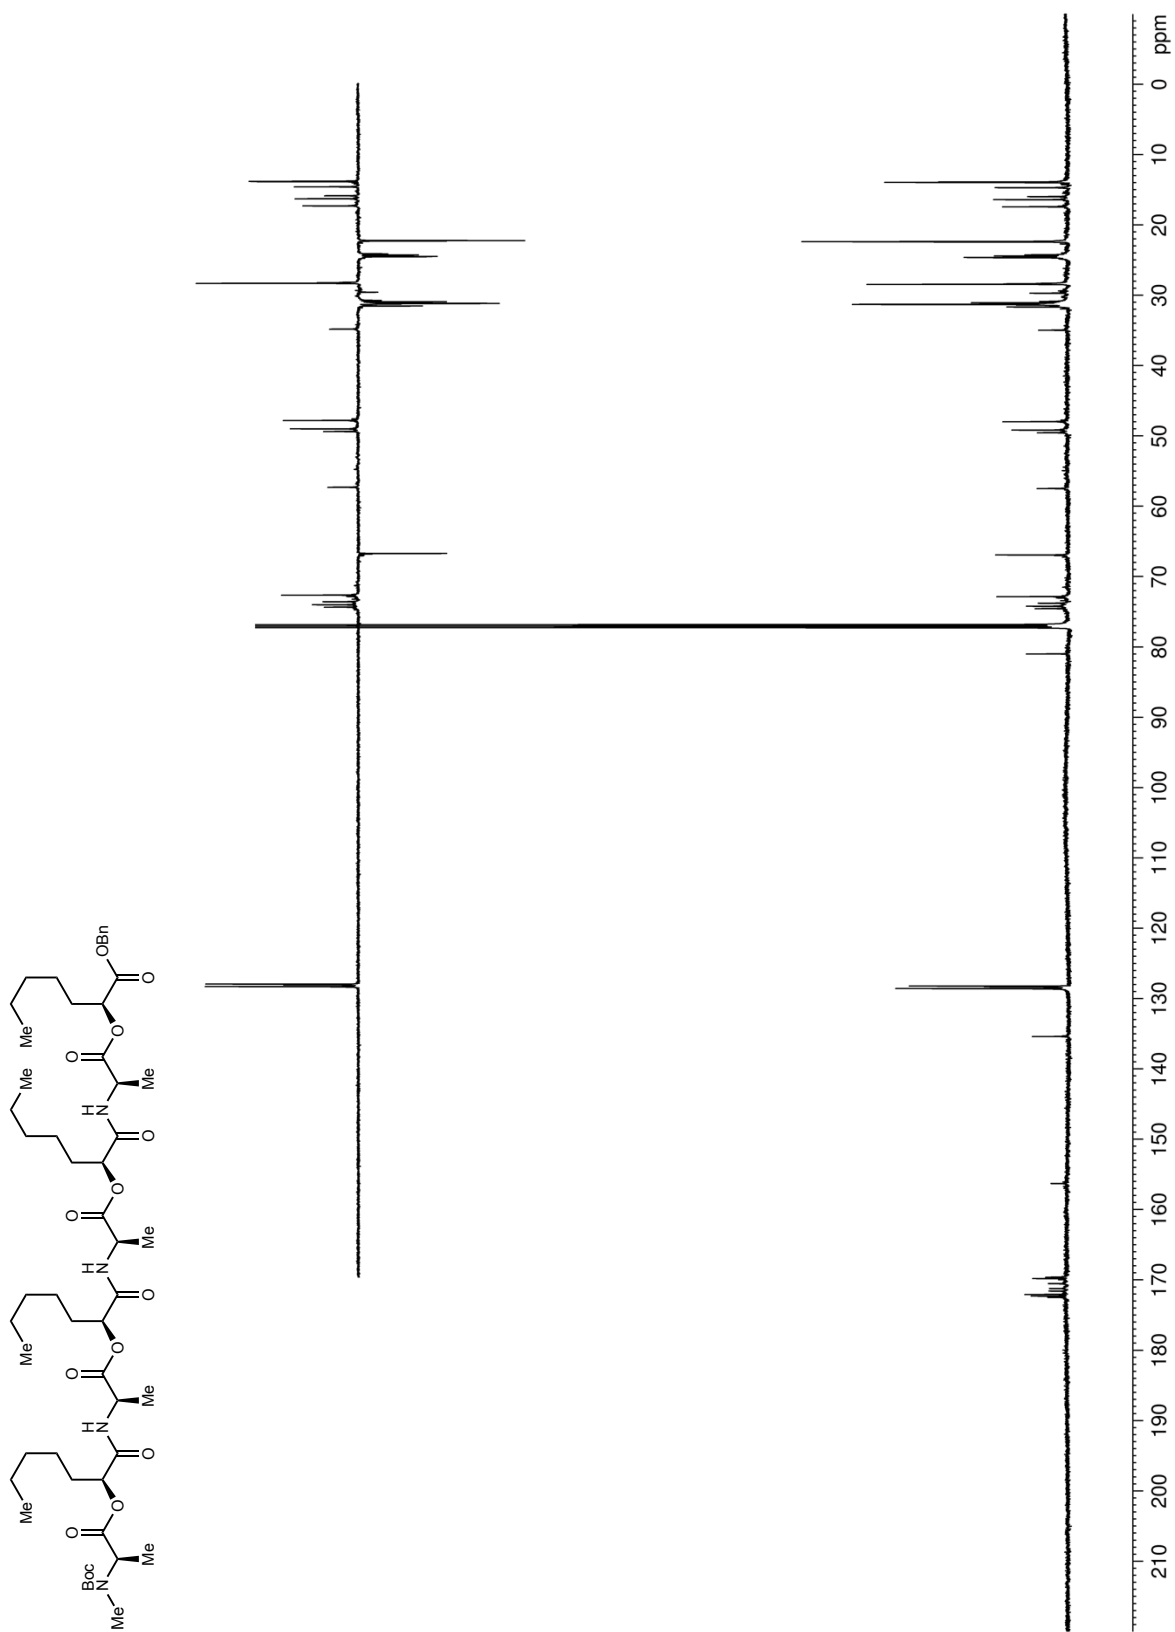

Figure S45.  $^1\text{H}$  NMR (600 MHz,  $\text{CDCl}_3$ ) of **O55**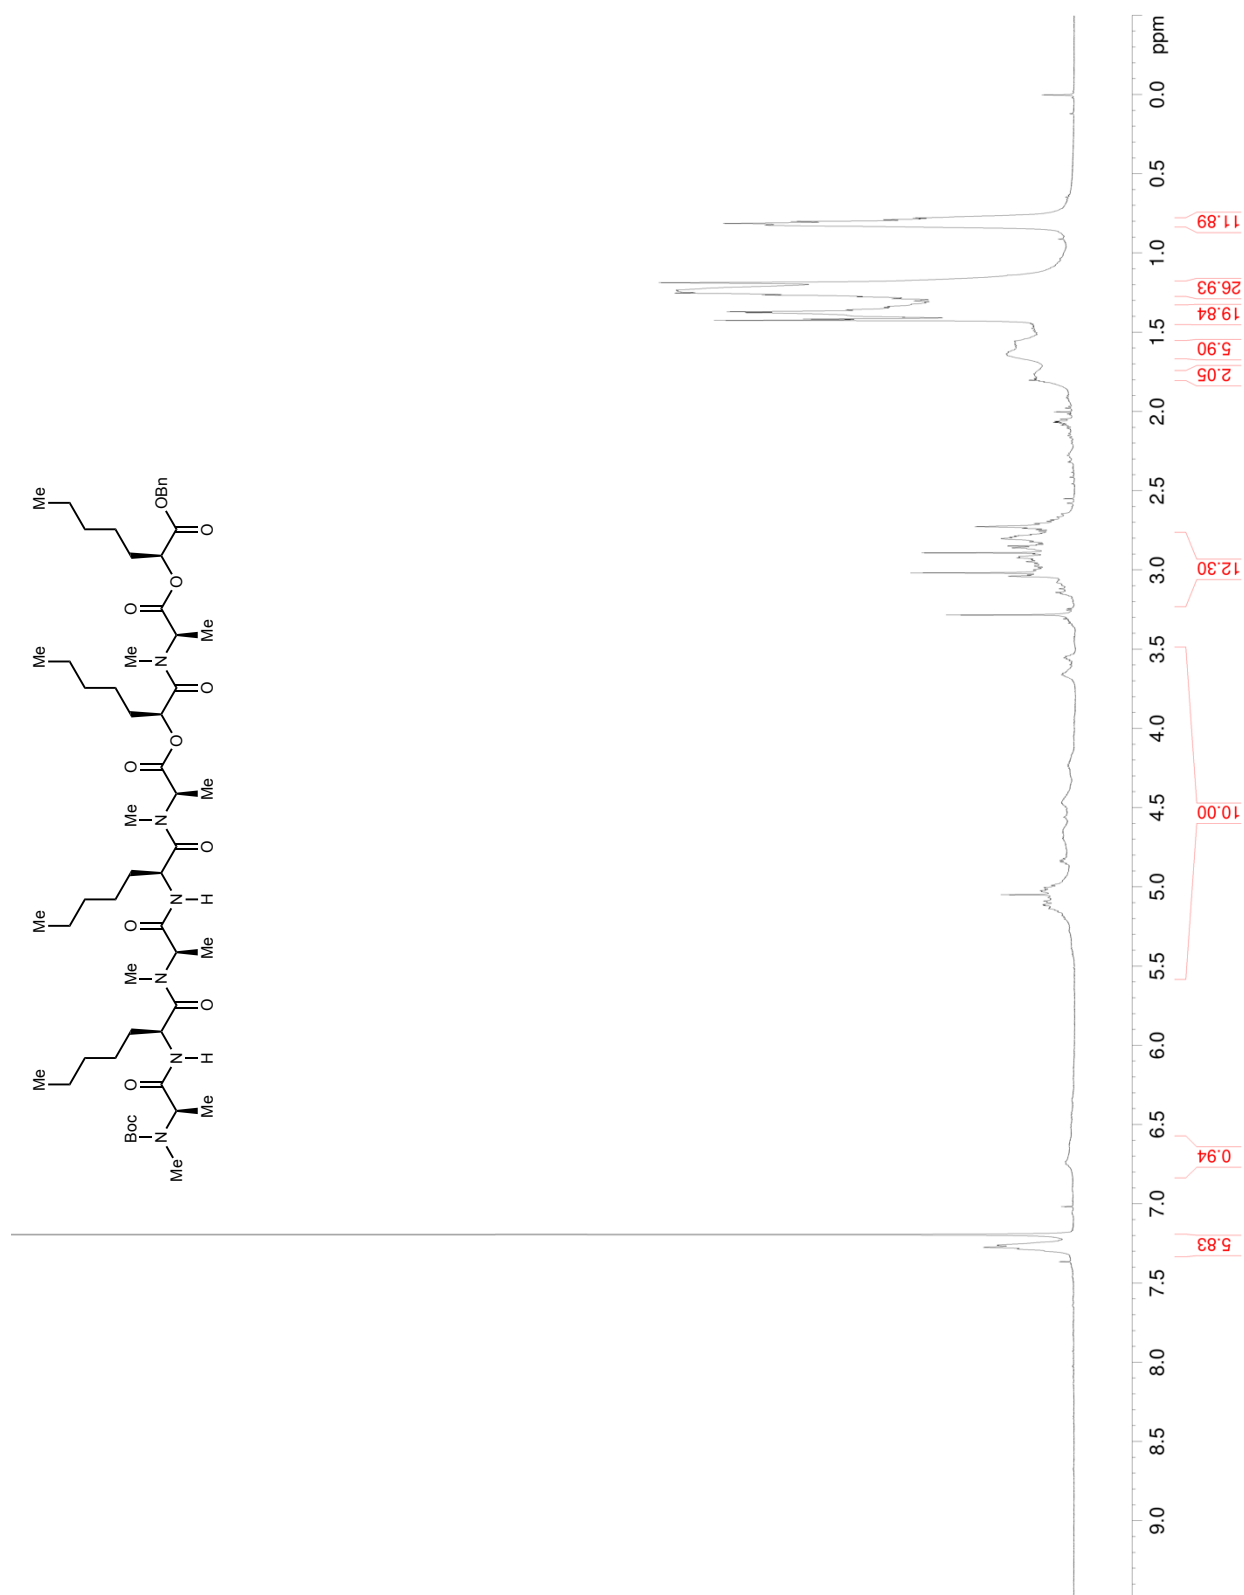

Figure S46.  $^{13}\text{C}$  NMR (150 MHz,  $\text{CDCl}_3$ ) of **O55**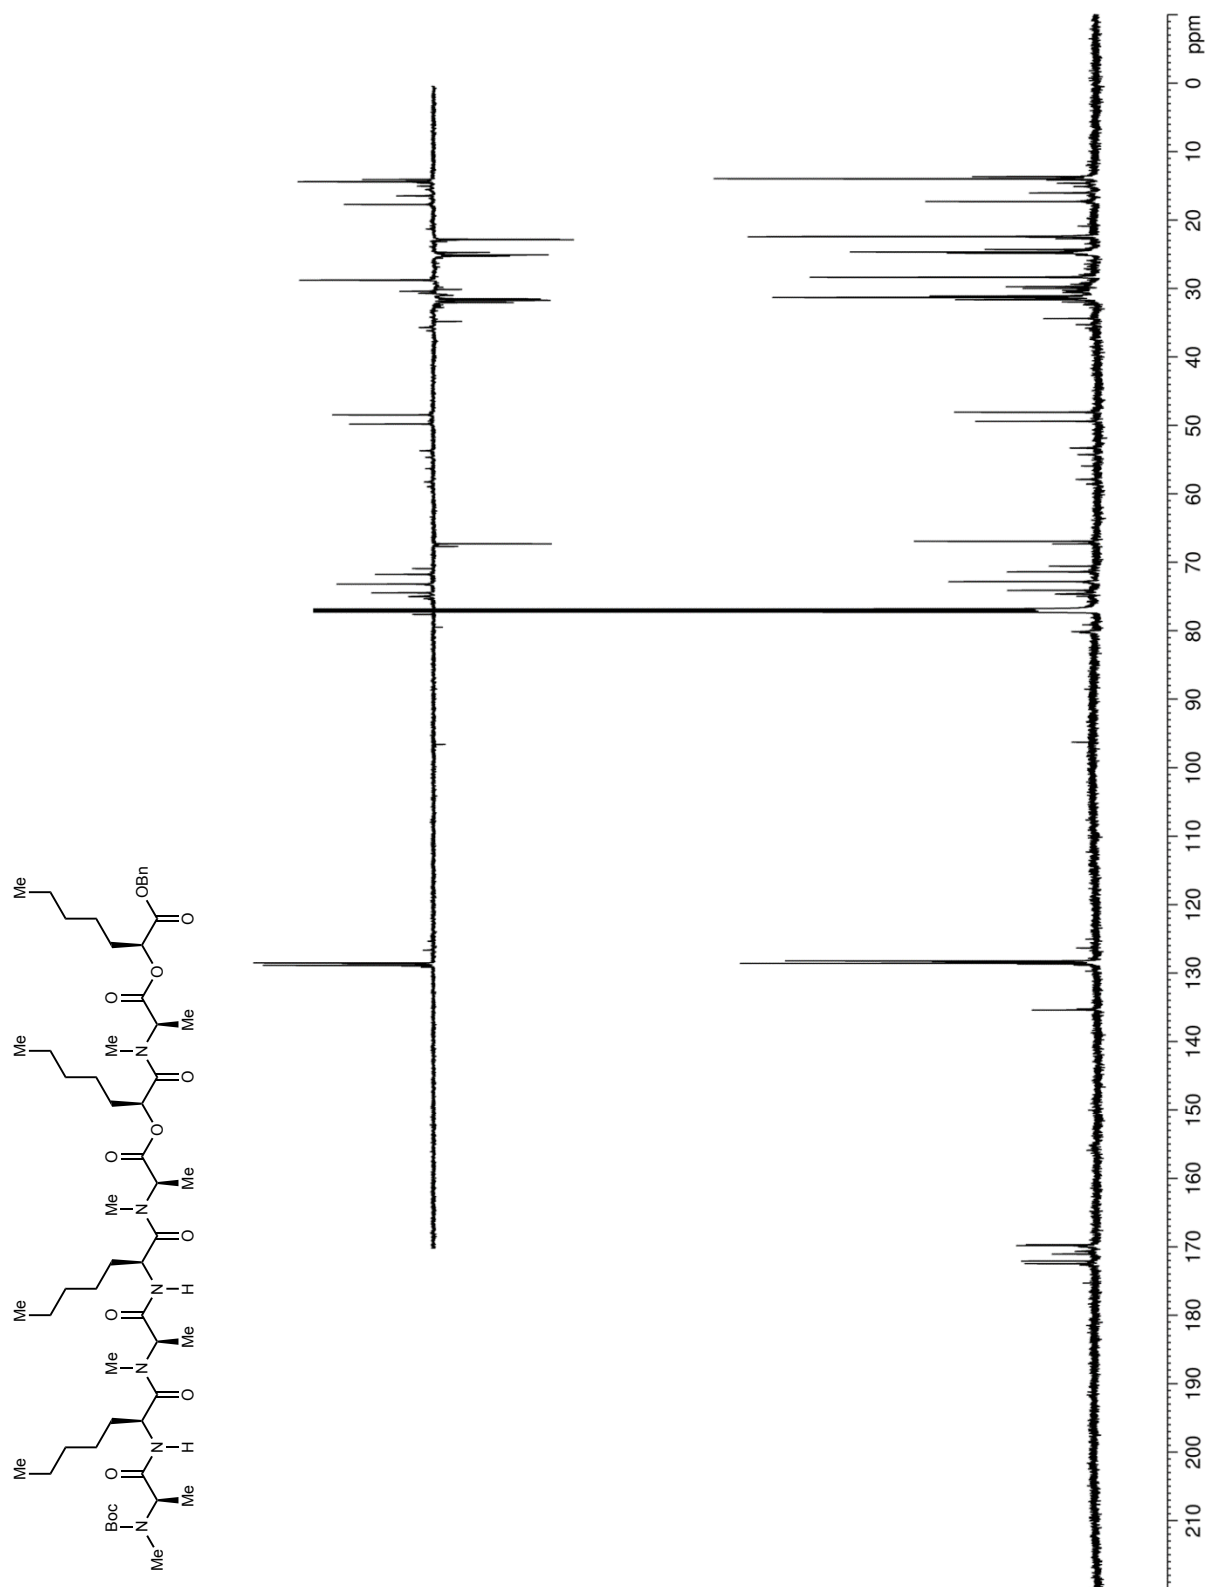

Figure S47.  $^1\text{H}$  NMR (600 MHz,  $\text{CDCl}_3$ ) of **O56**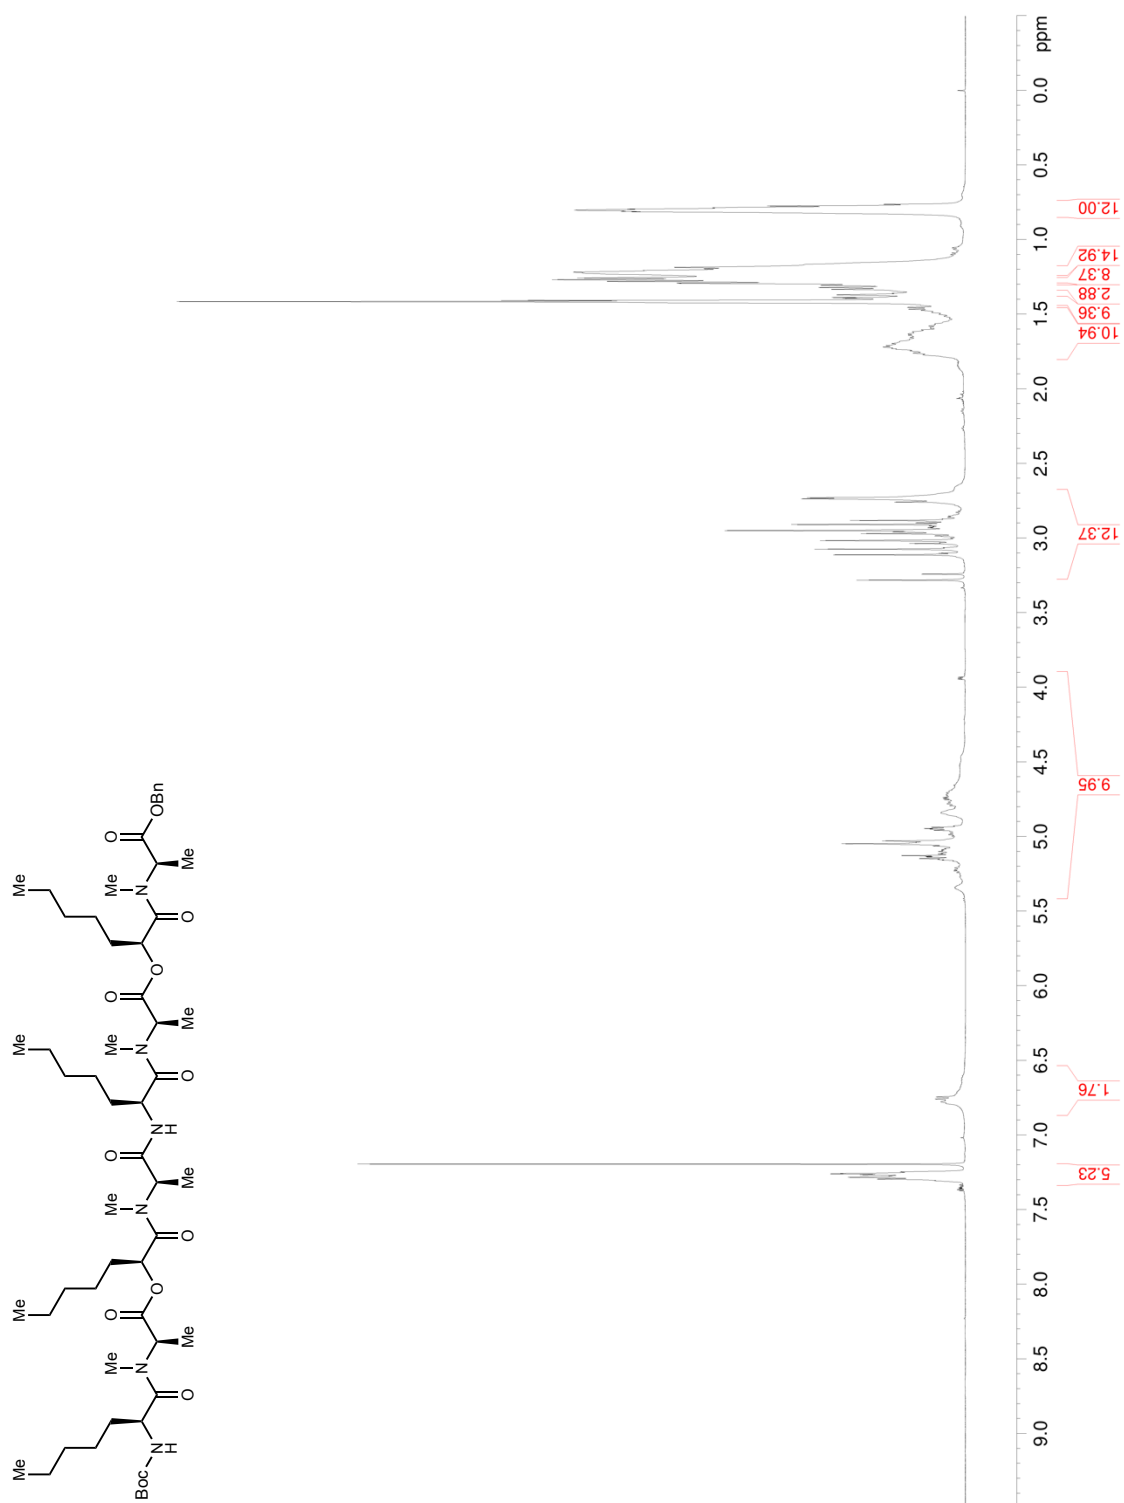

Figure S48.  $^{13}\text{C}$  NMR (150 MHz,  $\text{CDCl}_3$ ) of **O56**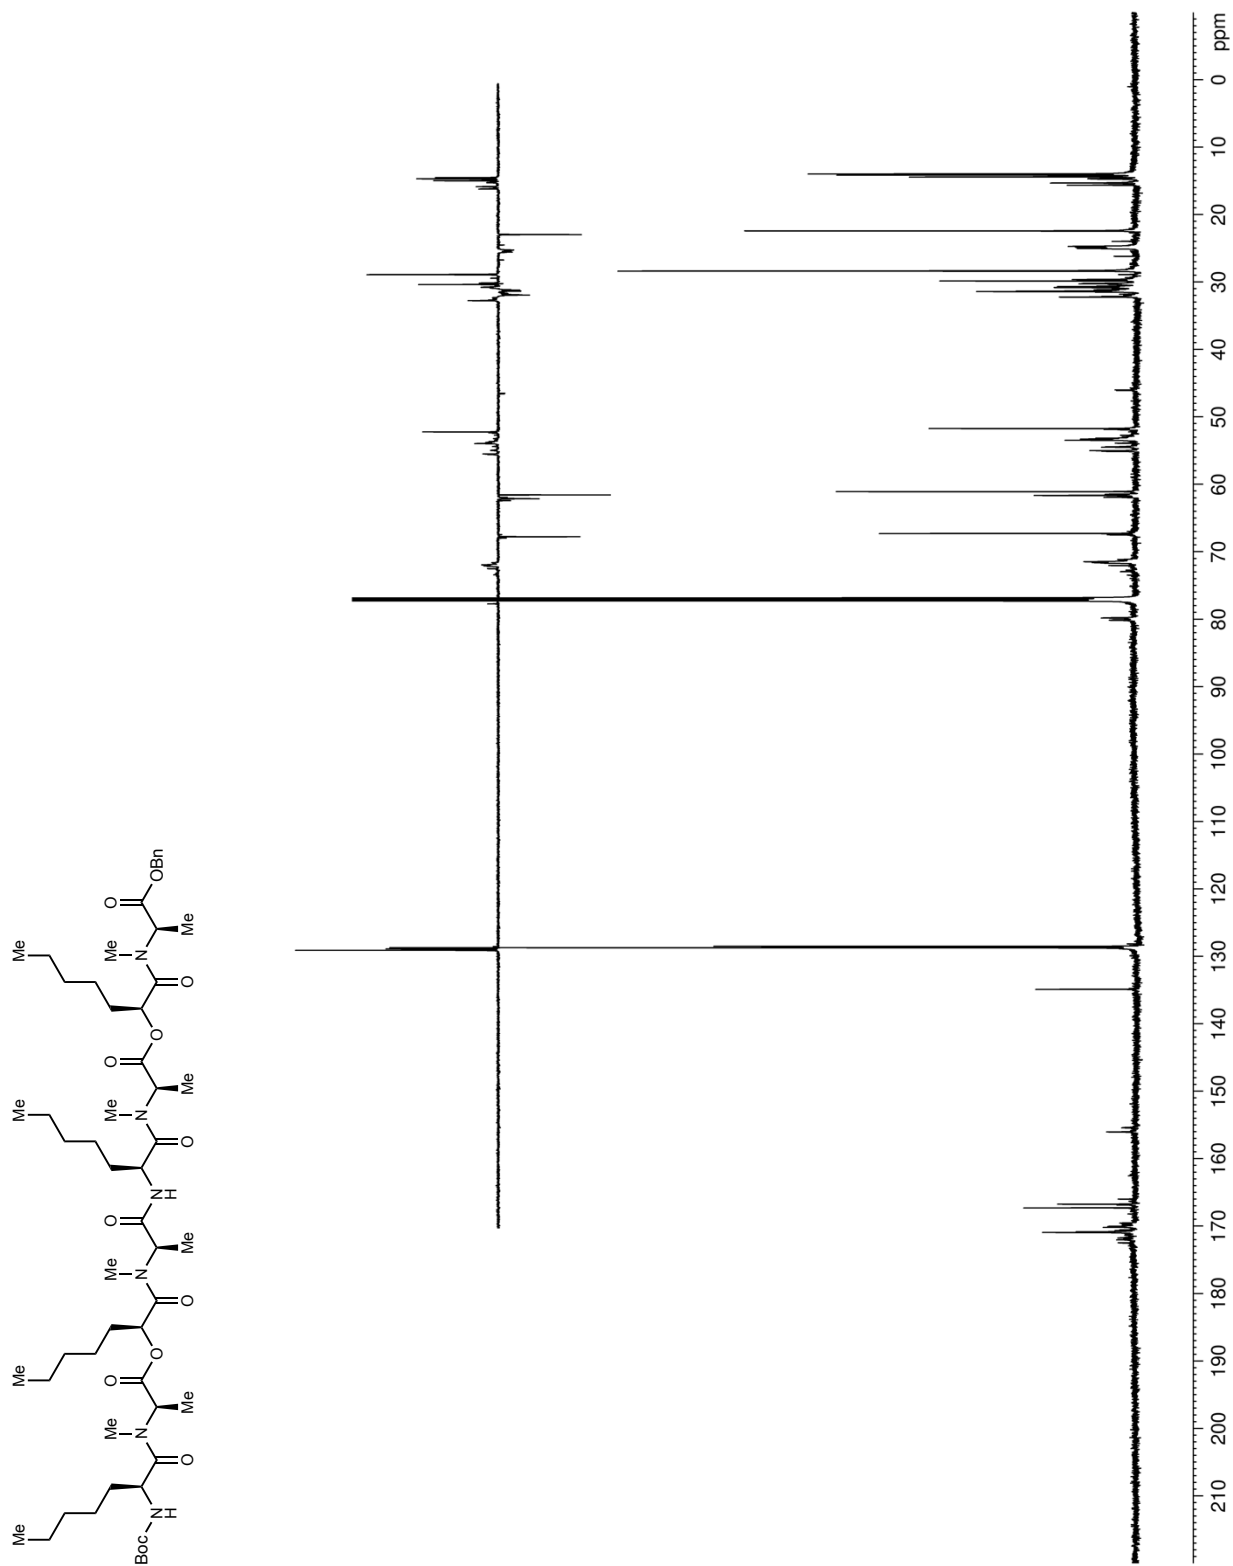



Figure S49.  $^1\text{H}$  NMR (600 MHz,  $\text{CDCl}_3$ ) of H57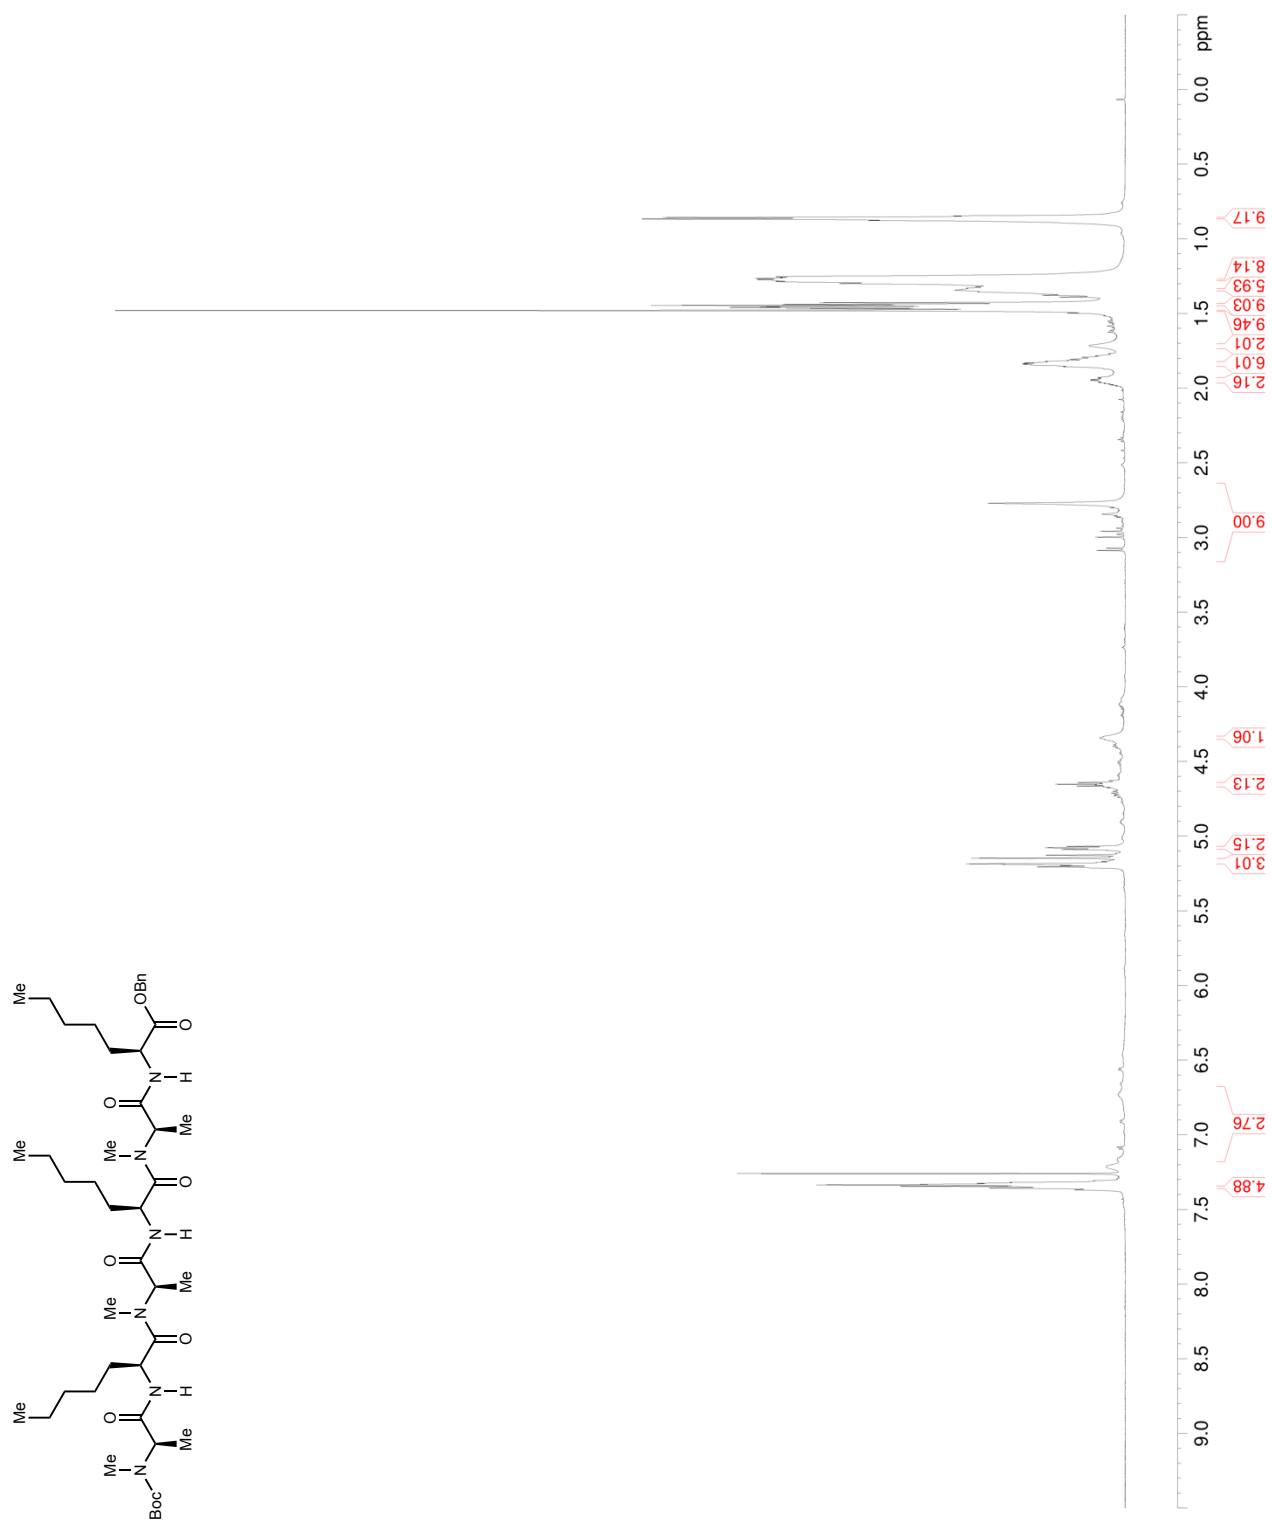

Figure S50.  $^{13}\text{C}$  NMR (150 MHz,  $\text{CDCl}_3$ ) of H57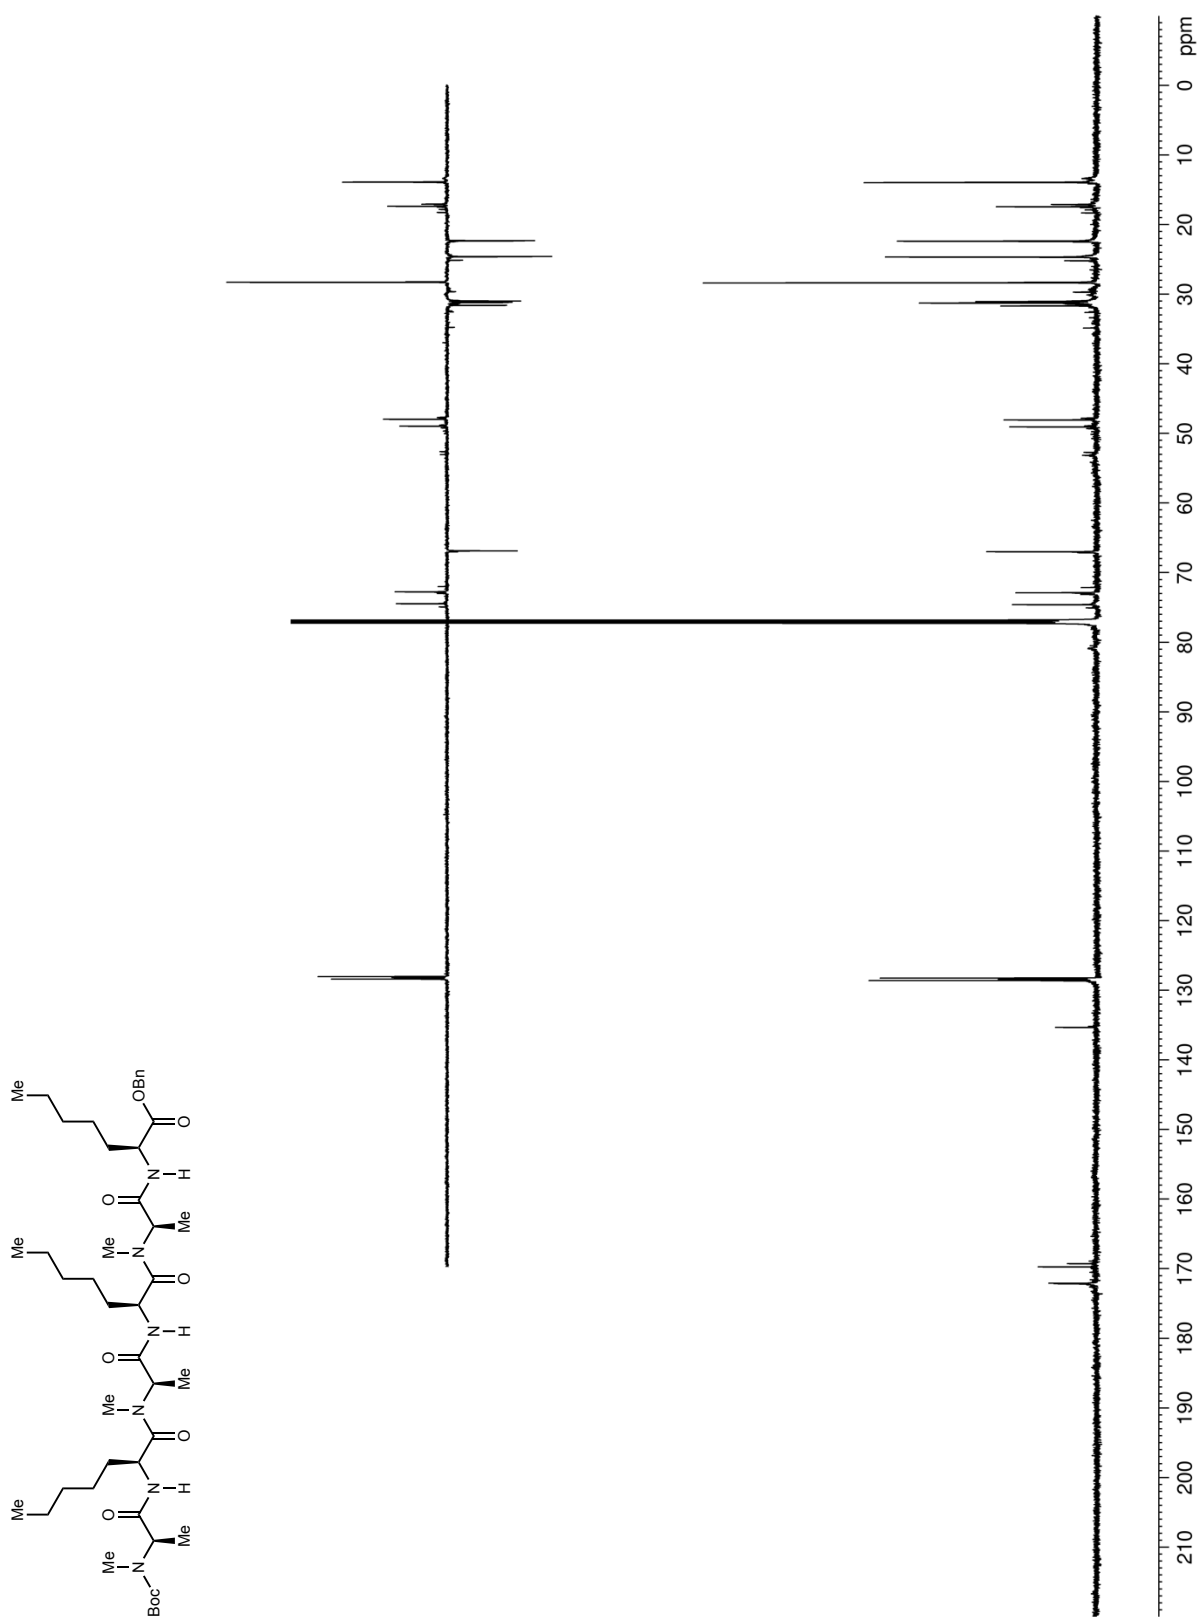

Figure S51.  $^1\text{H}$  NMR (600 MHz,  $\text{CDCl}_3$ ) of O58 (Boc deprotected)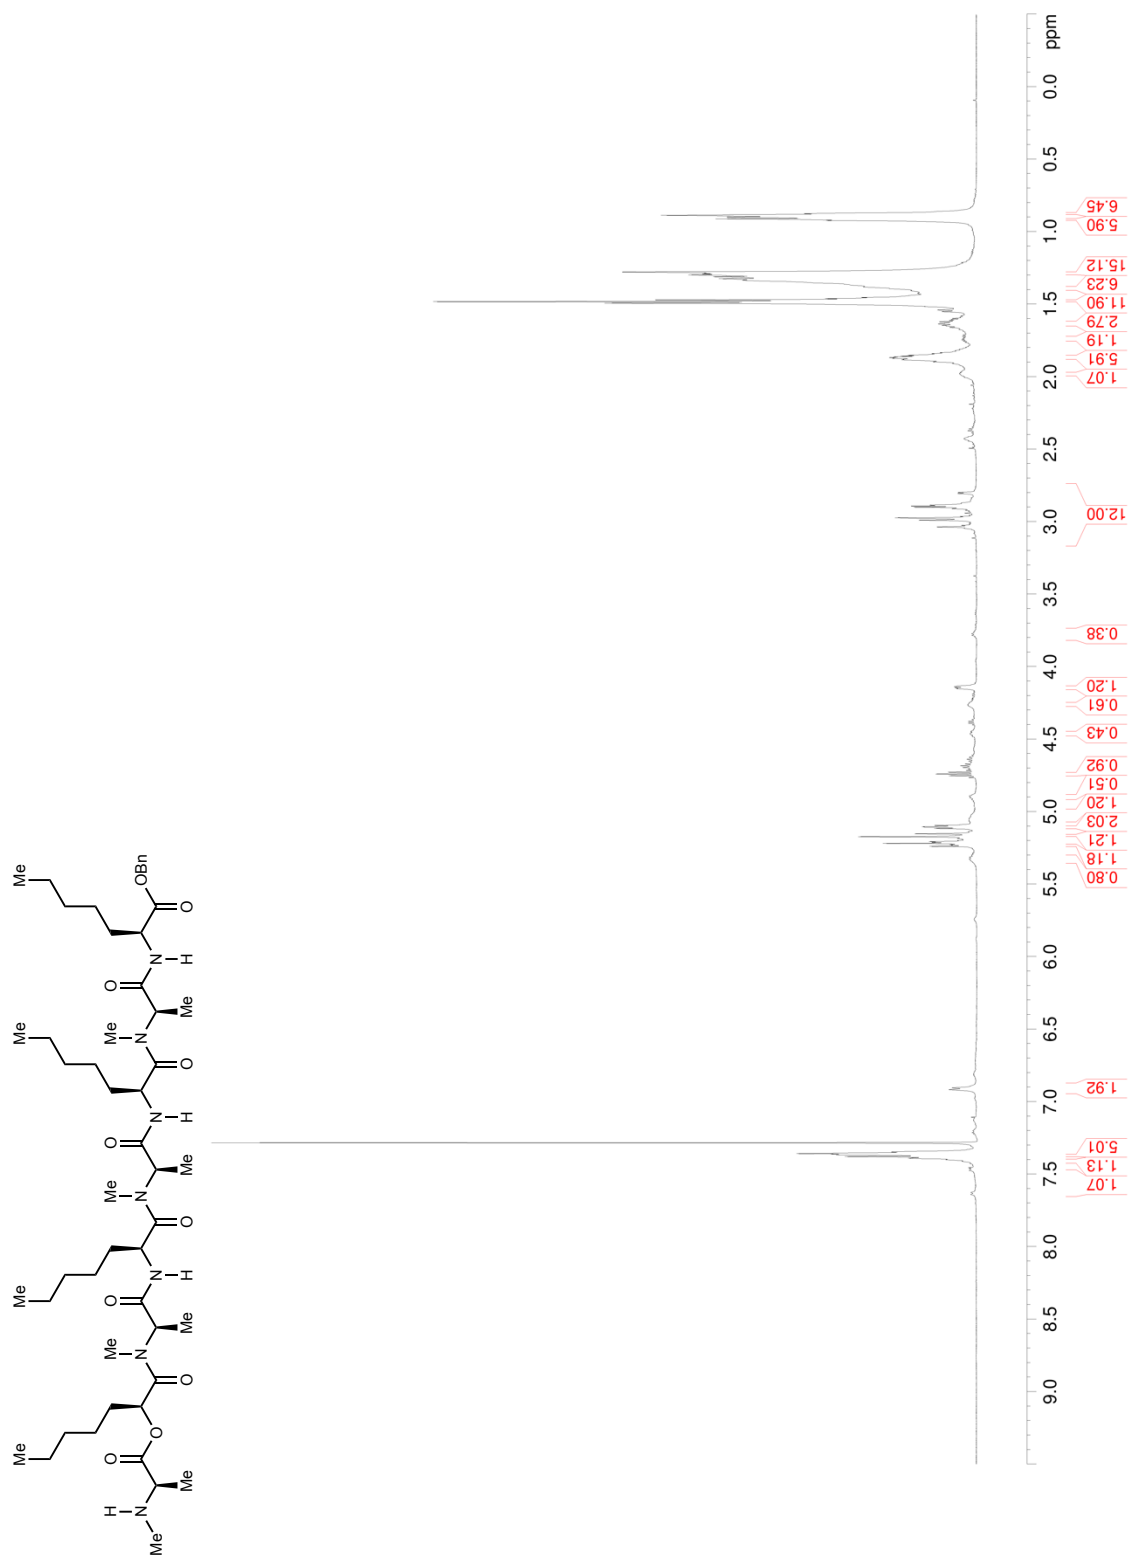



Figure S53.  $^1\text{H}$  NMR (600 MHz,  $\text{CDCl}_3$ ) of **O59**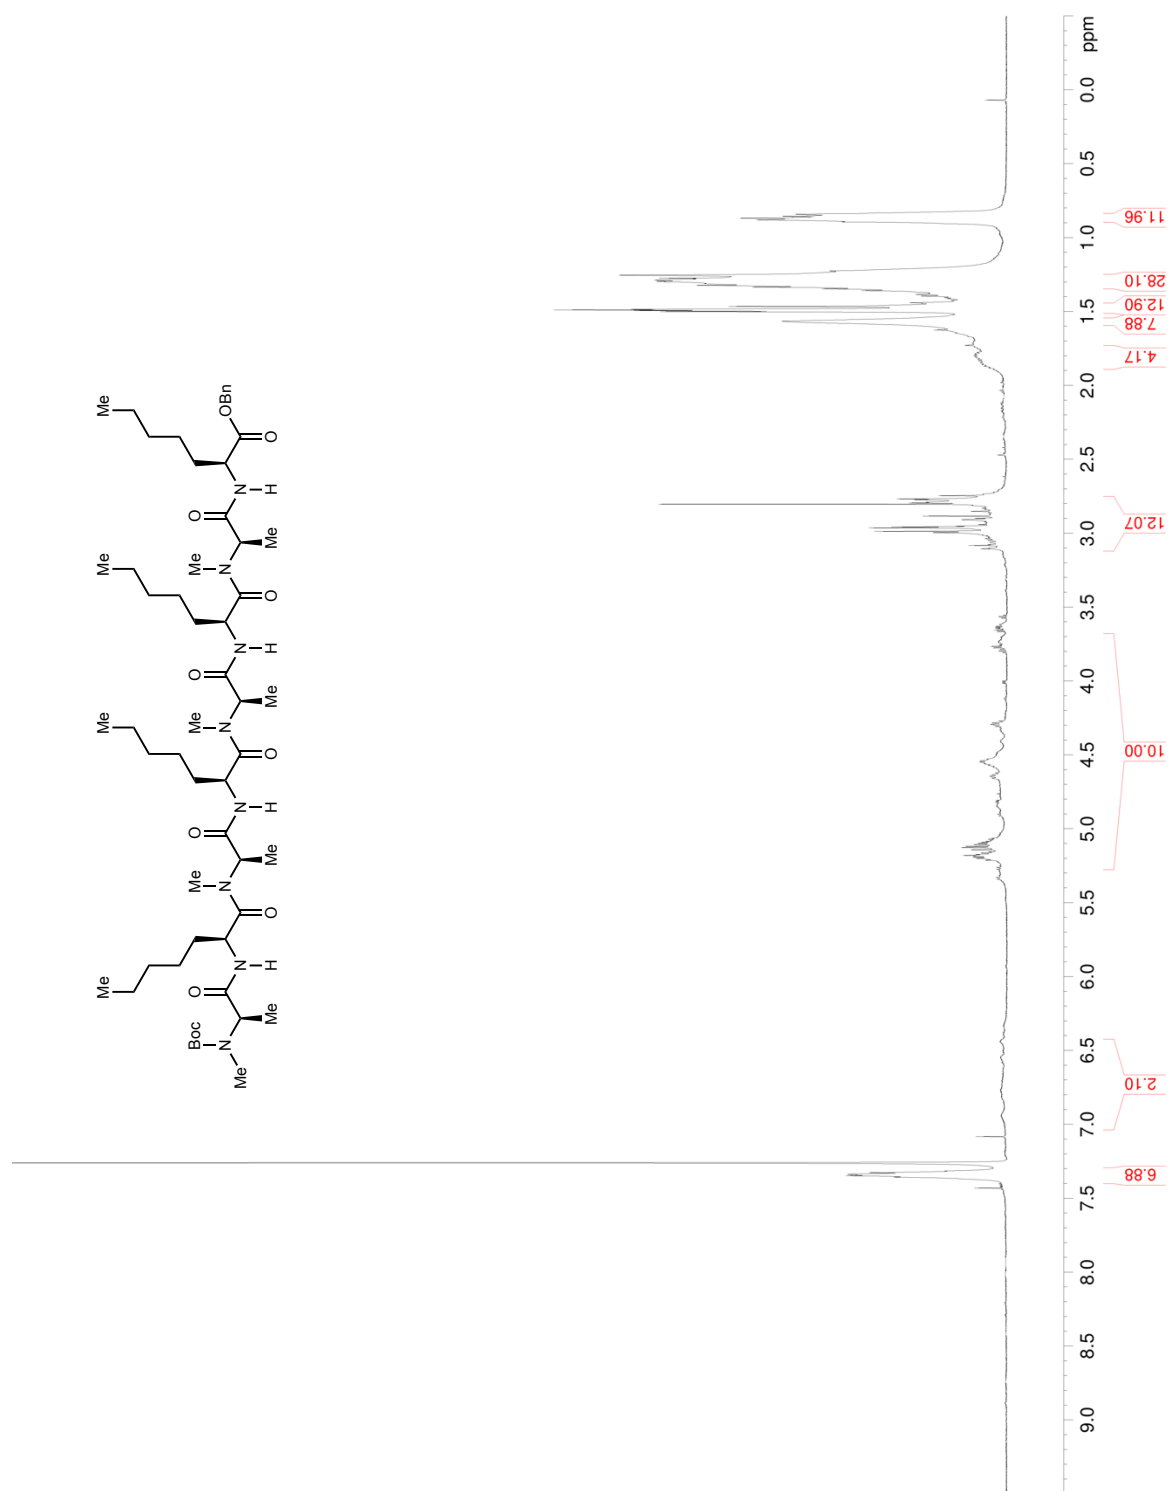

Figure S54.  $^{13}\text{C}$  NMR (150 MHz,  $\text{CDCl}_3$ ) of **O59**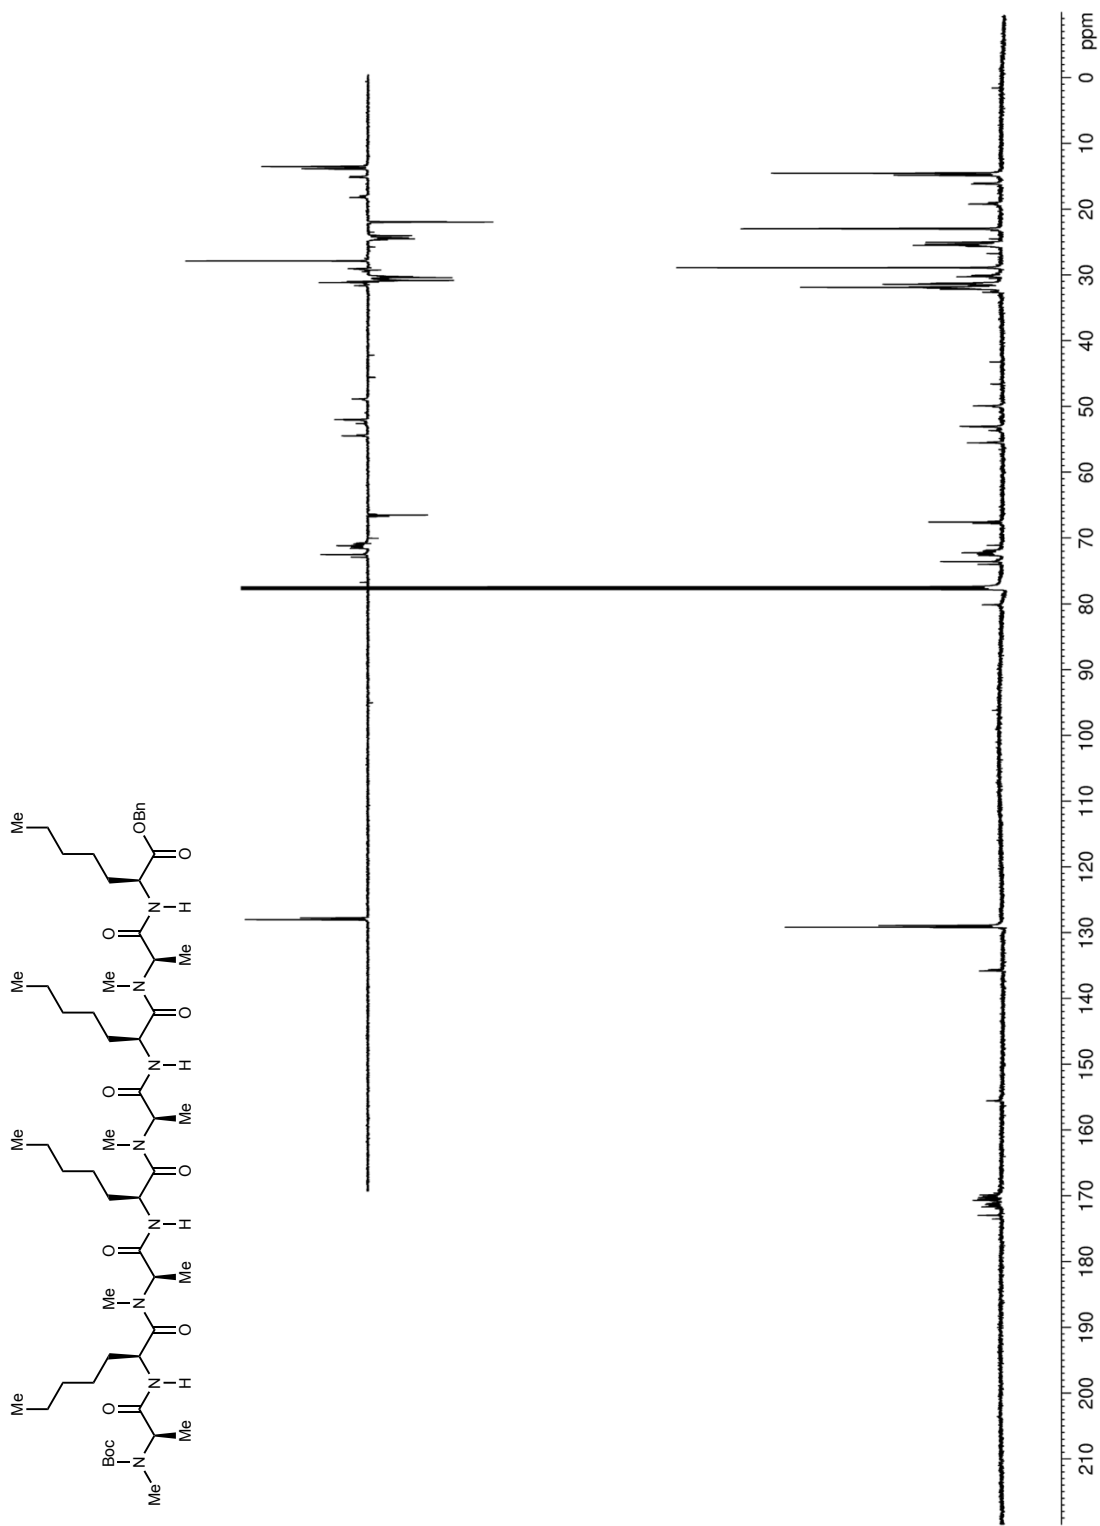

Figure S55.  $^1\text{H}$  NMR (600 MHz,  $\text{CDCl}_3$ ) of **O60**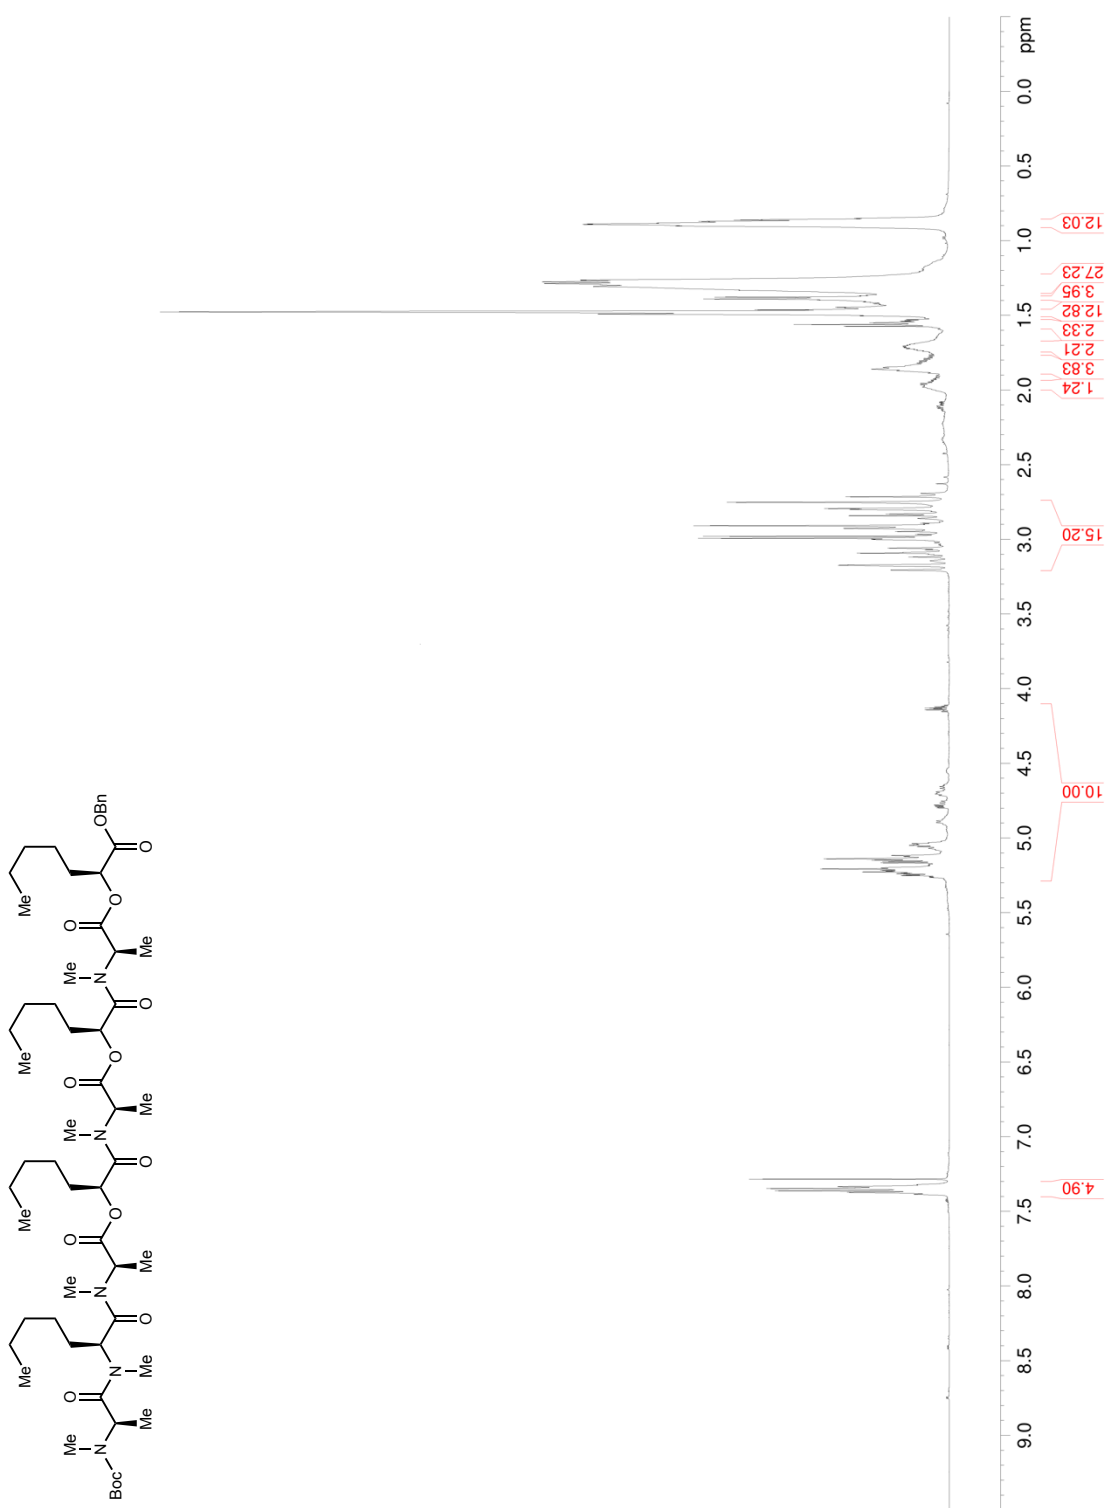

**Figure S56.**  $^{13}\text{C}$  NMR (150 MHz,  $\text{CDCl}_3$ ) of **O60**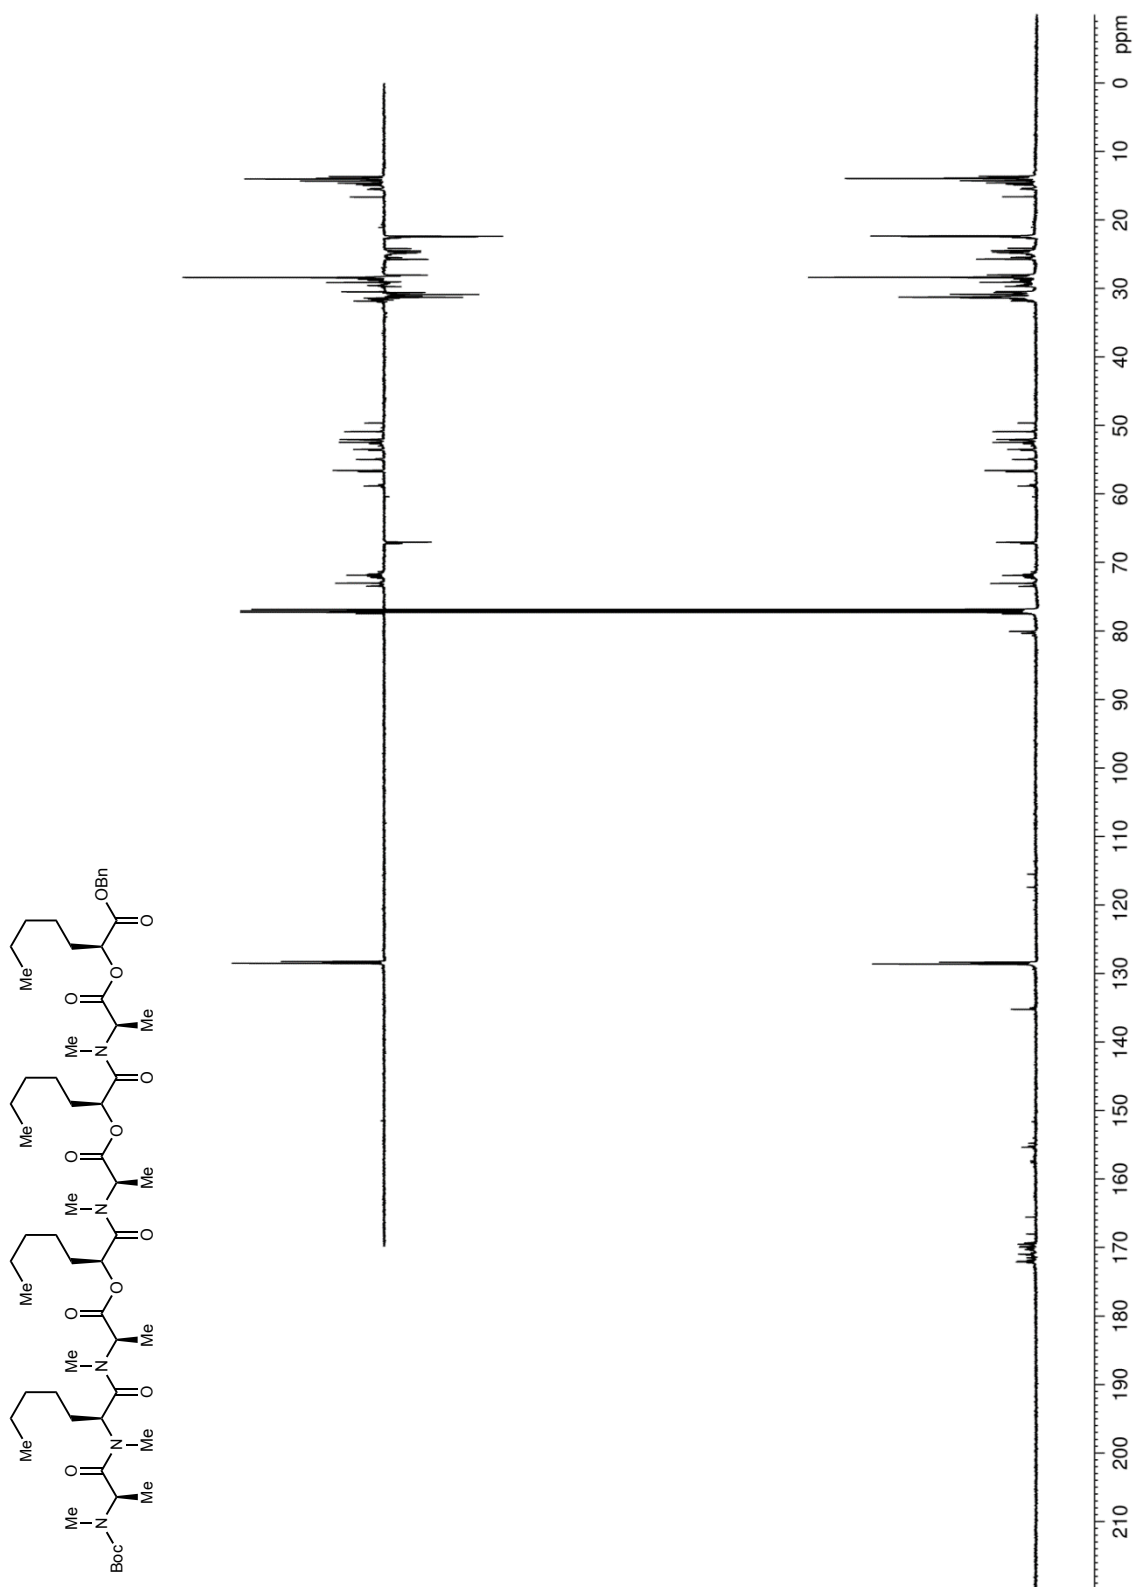



Figure S57.  $^1\text{H}$  NMR (600 MHz,  $\text{CDCl}_3$ ) of **O61**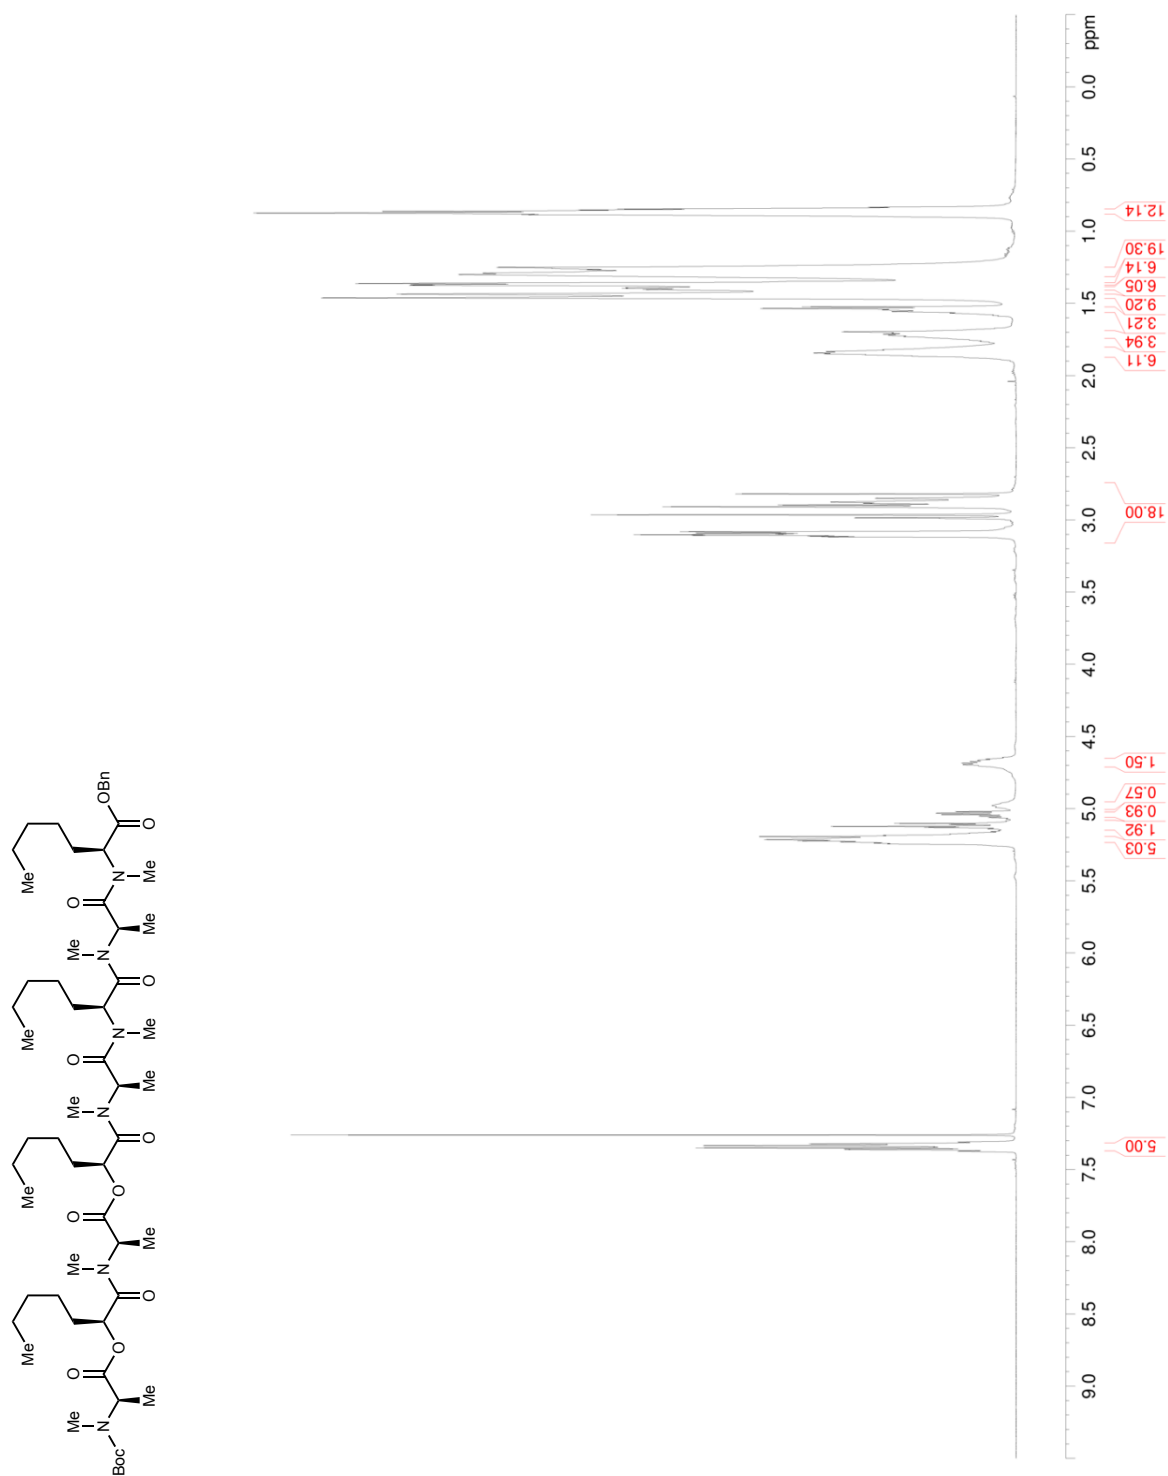

Figure S58.  $^{13}\text{C}$  NMR (150 MHz,  $\text{CDCl}_3$ ) of O61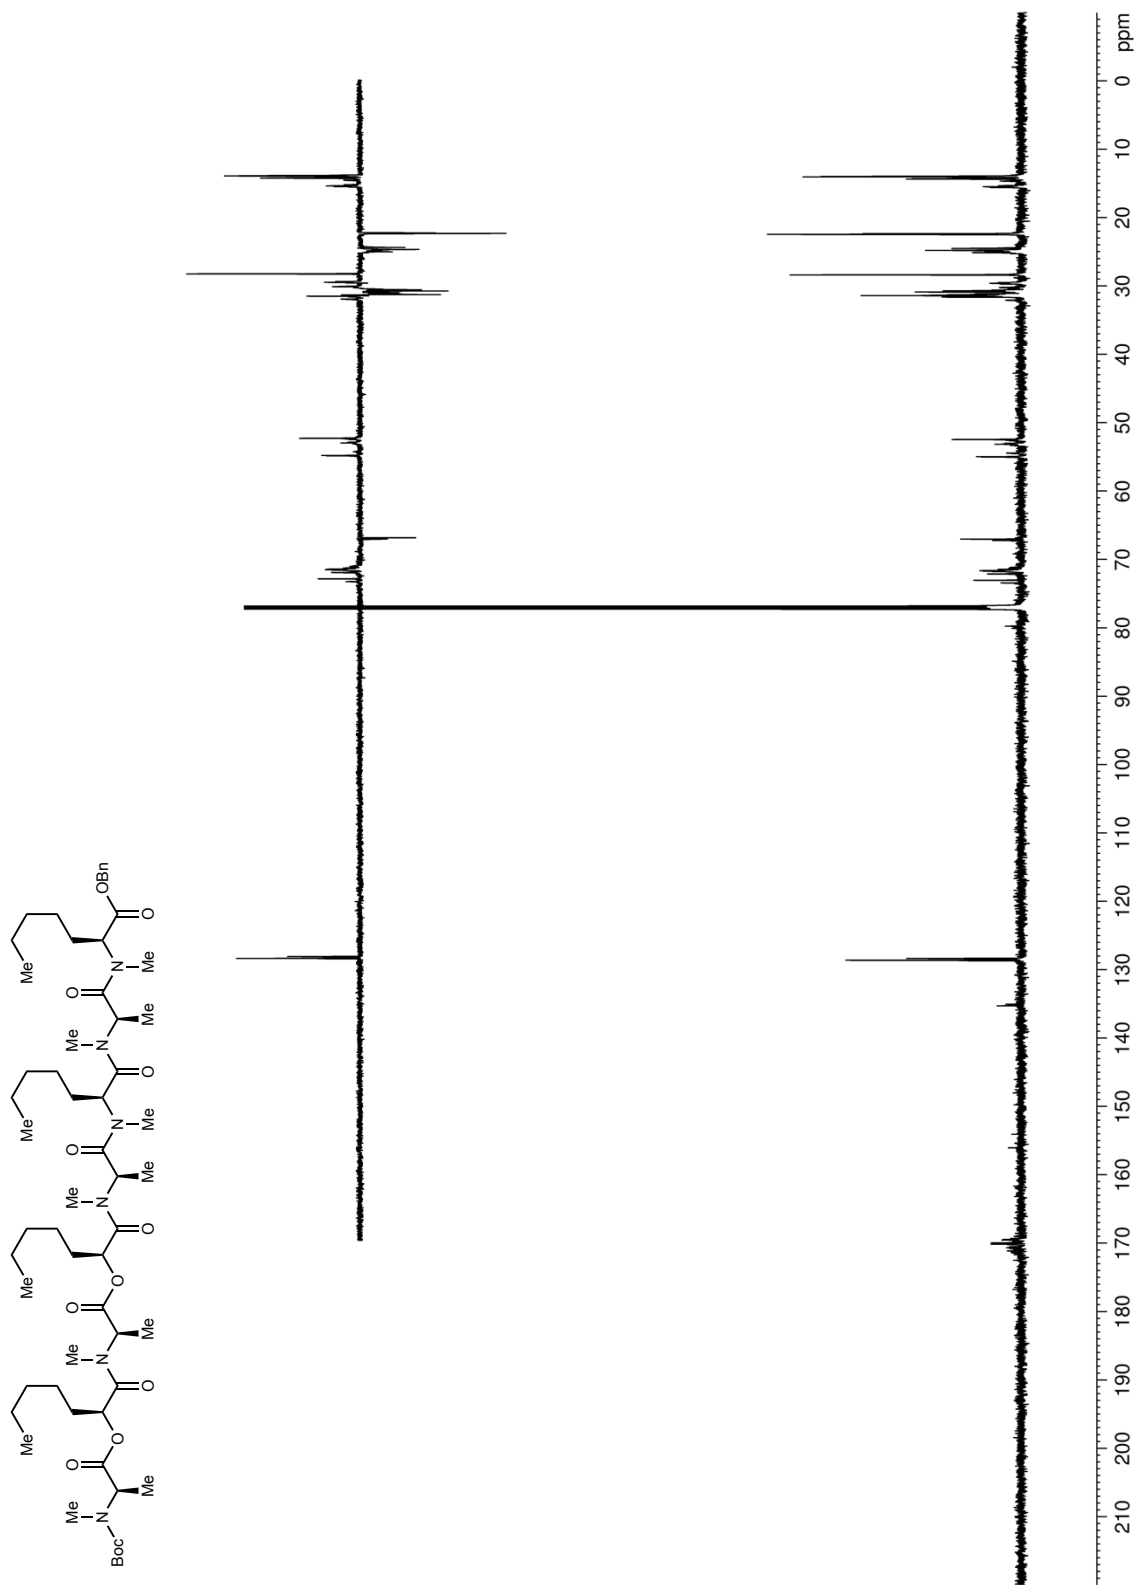

Figure S59.  $^1\text{H}$  NMR (600 MHz,  $\text{CDCl}_3$ ) of **O62**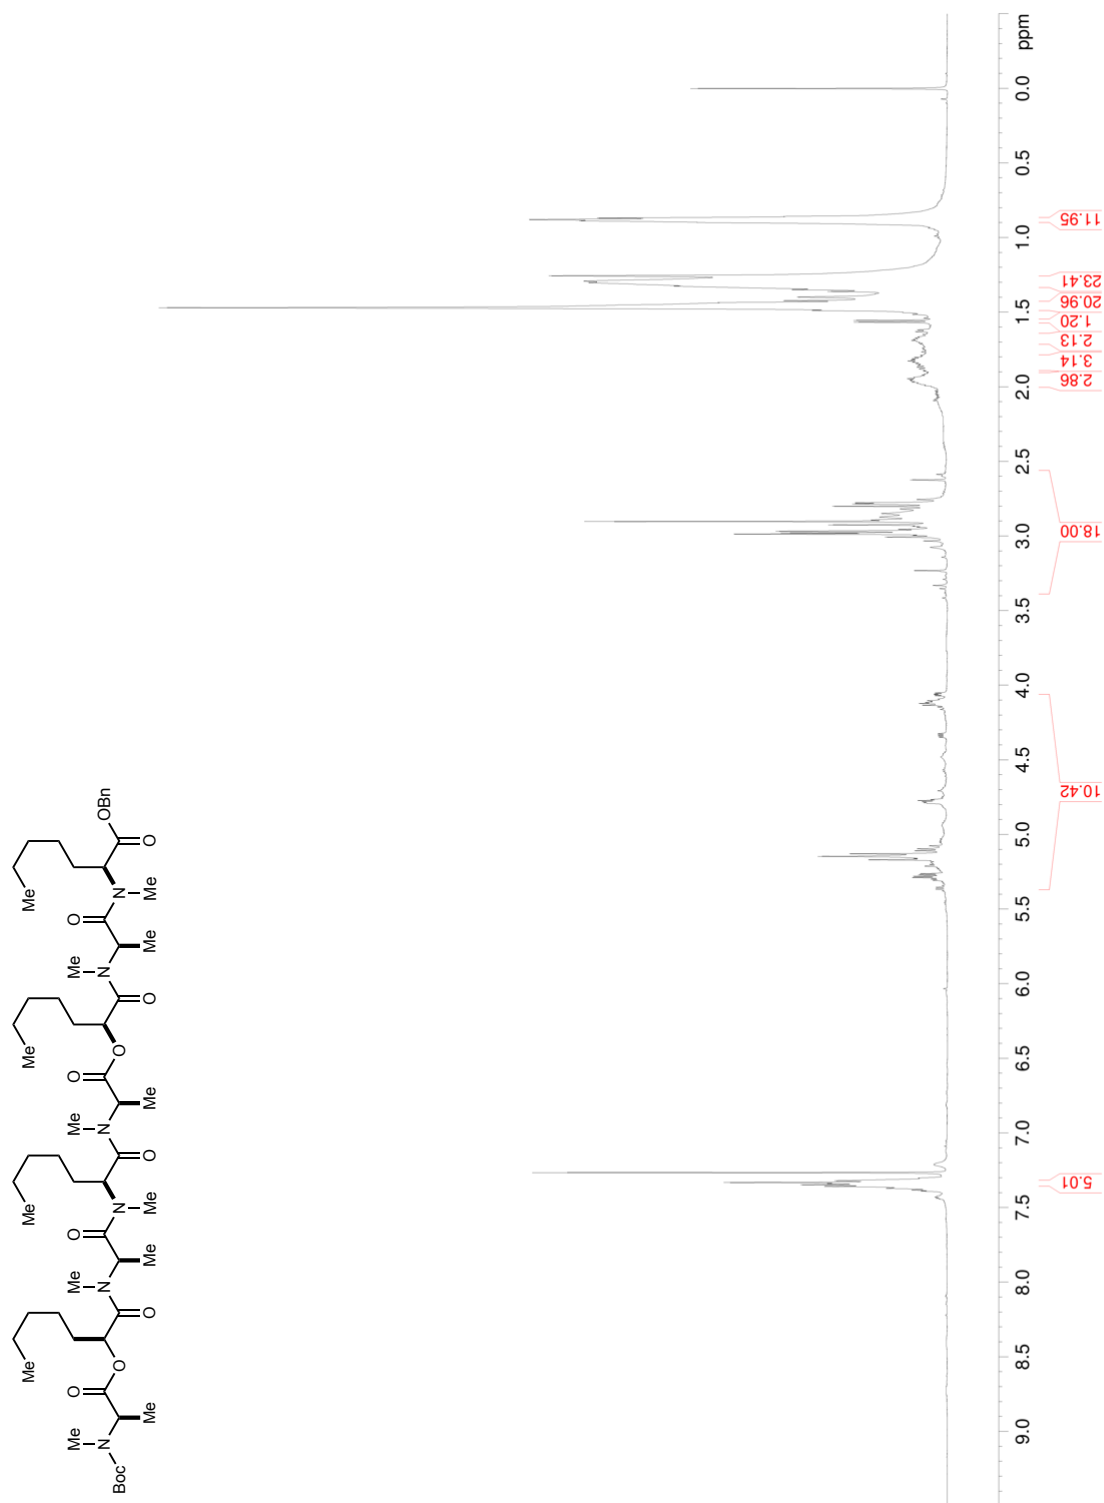

Figure S60.  $^{13}\text{C}$  NMR (150 MHz,  $\text{CDCl}_3$ ) of O62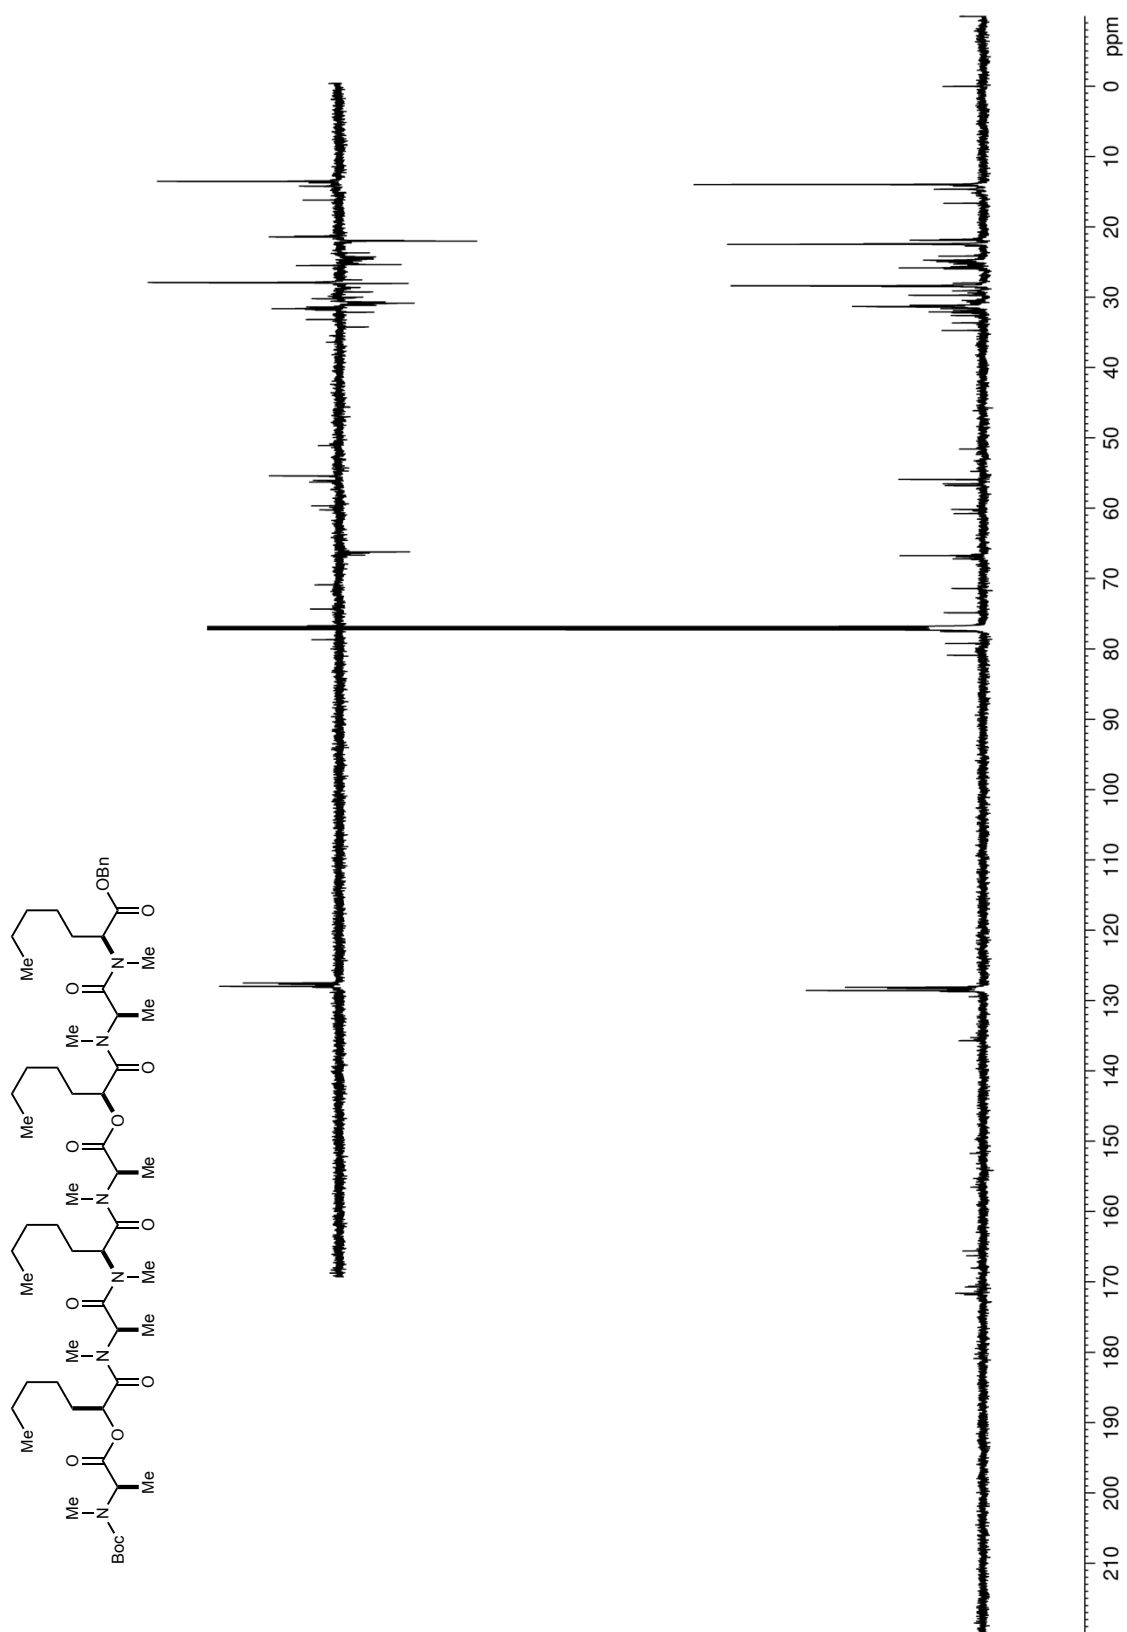

Figure S61.  $^1\text{H}$  NMR (600 MHz,  $\text{CDCl}_3$ ) of H63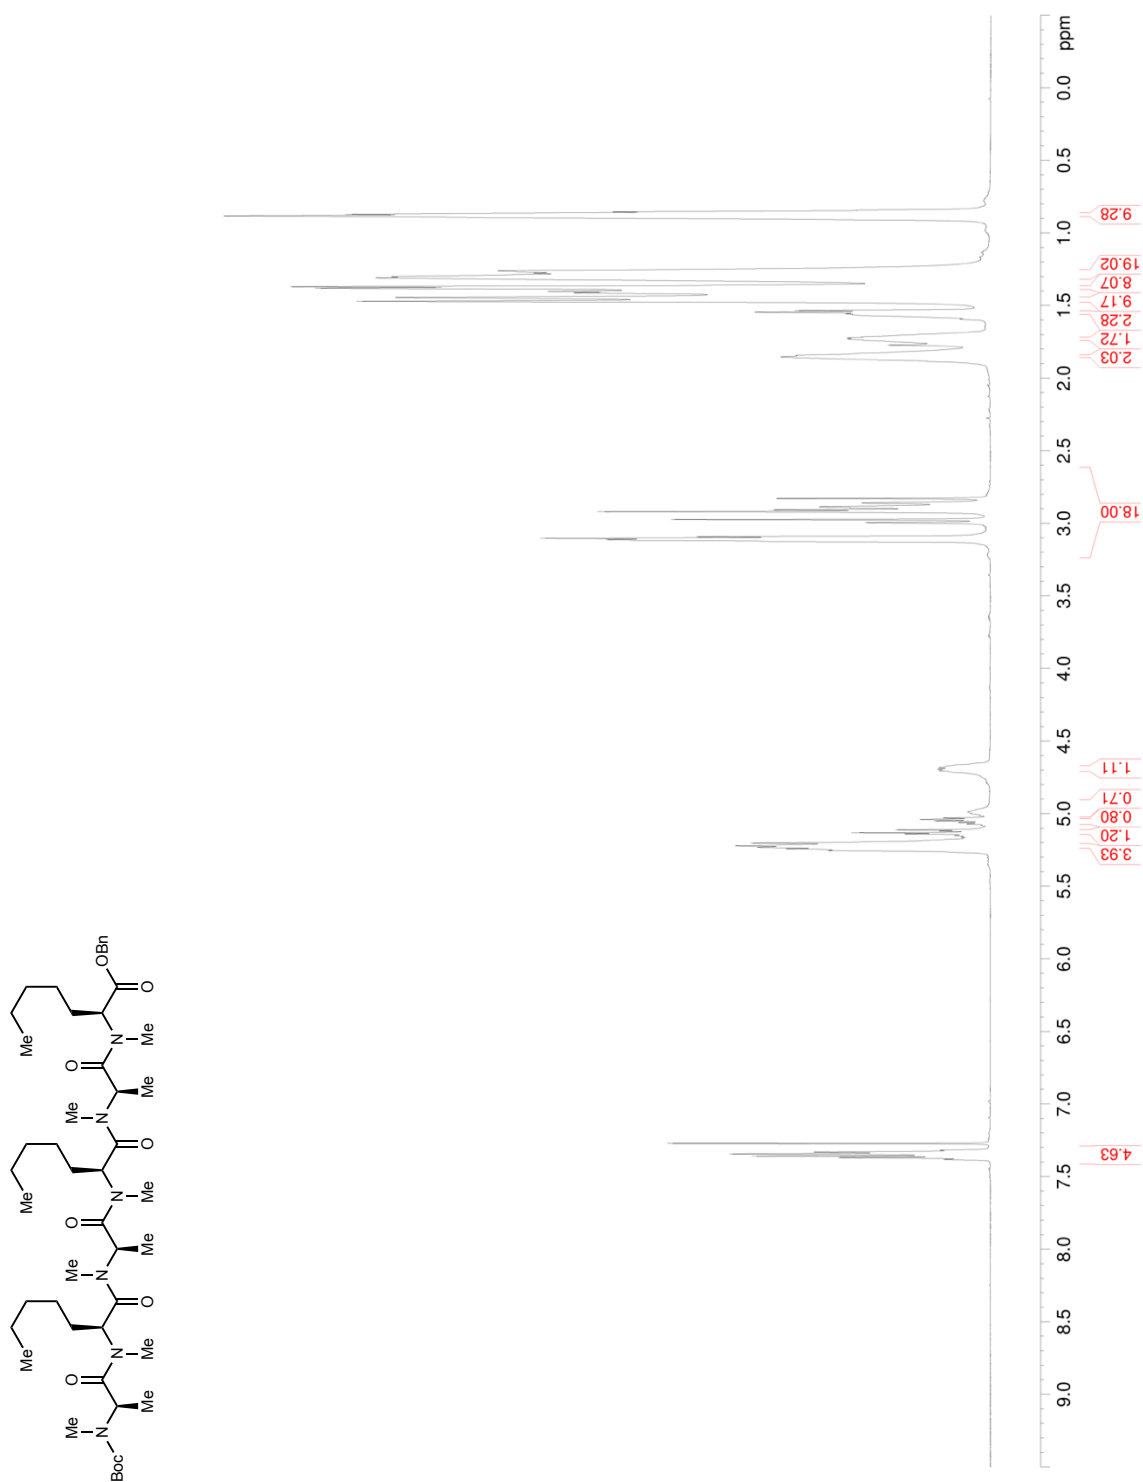



Figure S63.  $^1\text{H}$  NMR (600 MHz,  $\text{CDCl}_3$ ) of **O64**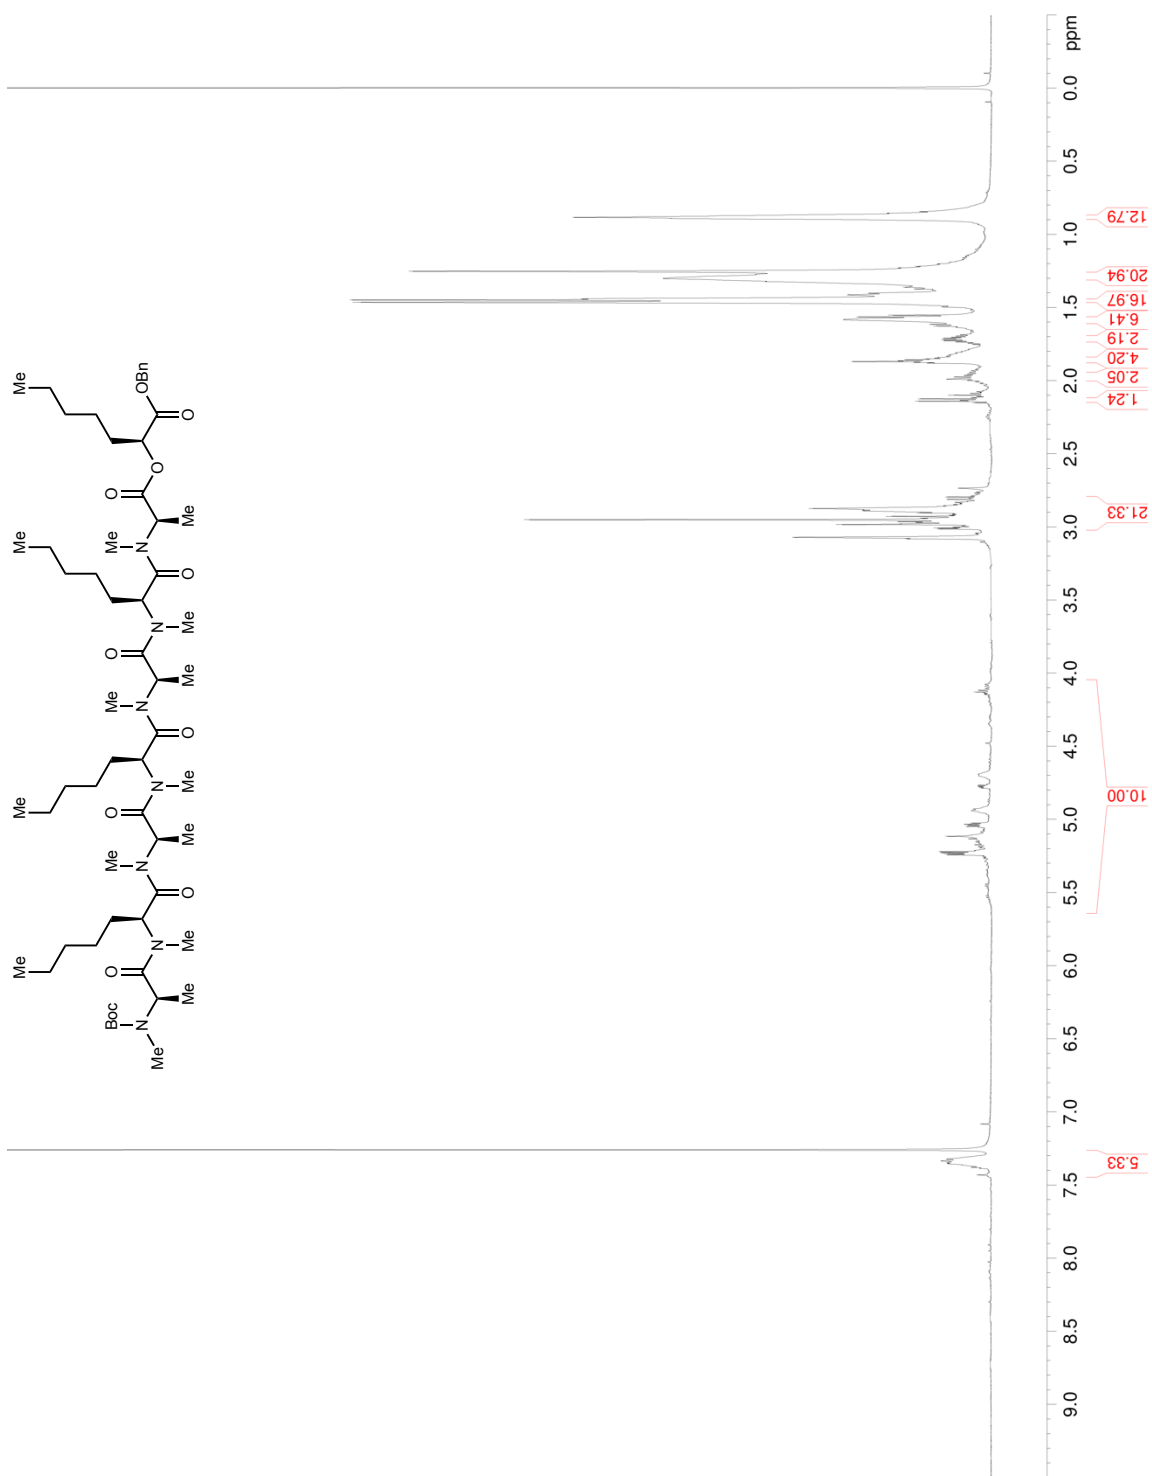

Figure S64.  $^{13}\text{C}$  NMR (150 MHz,  $\text{CDCl}_3$ ) of O64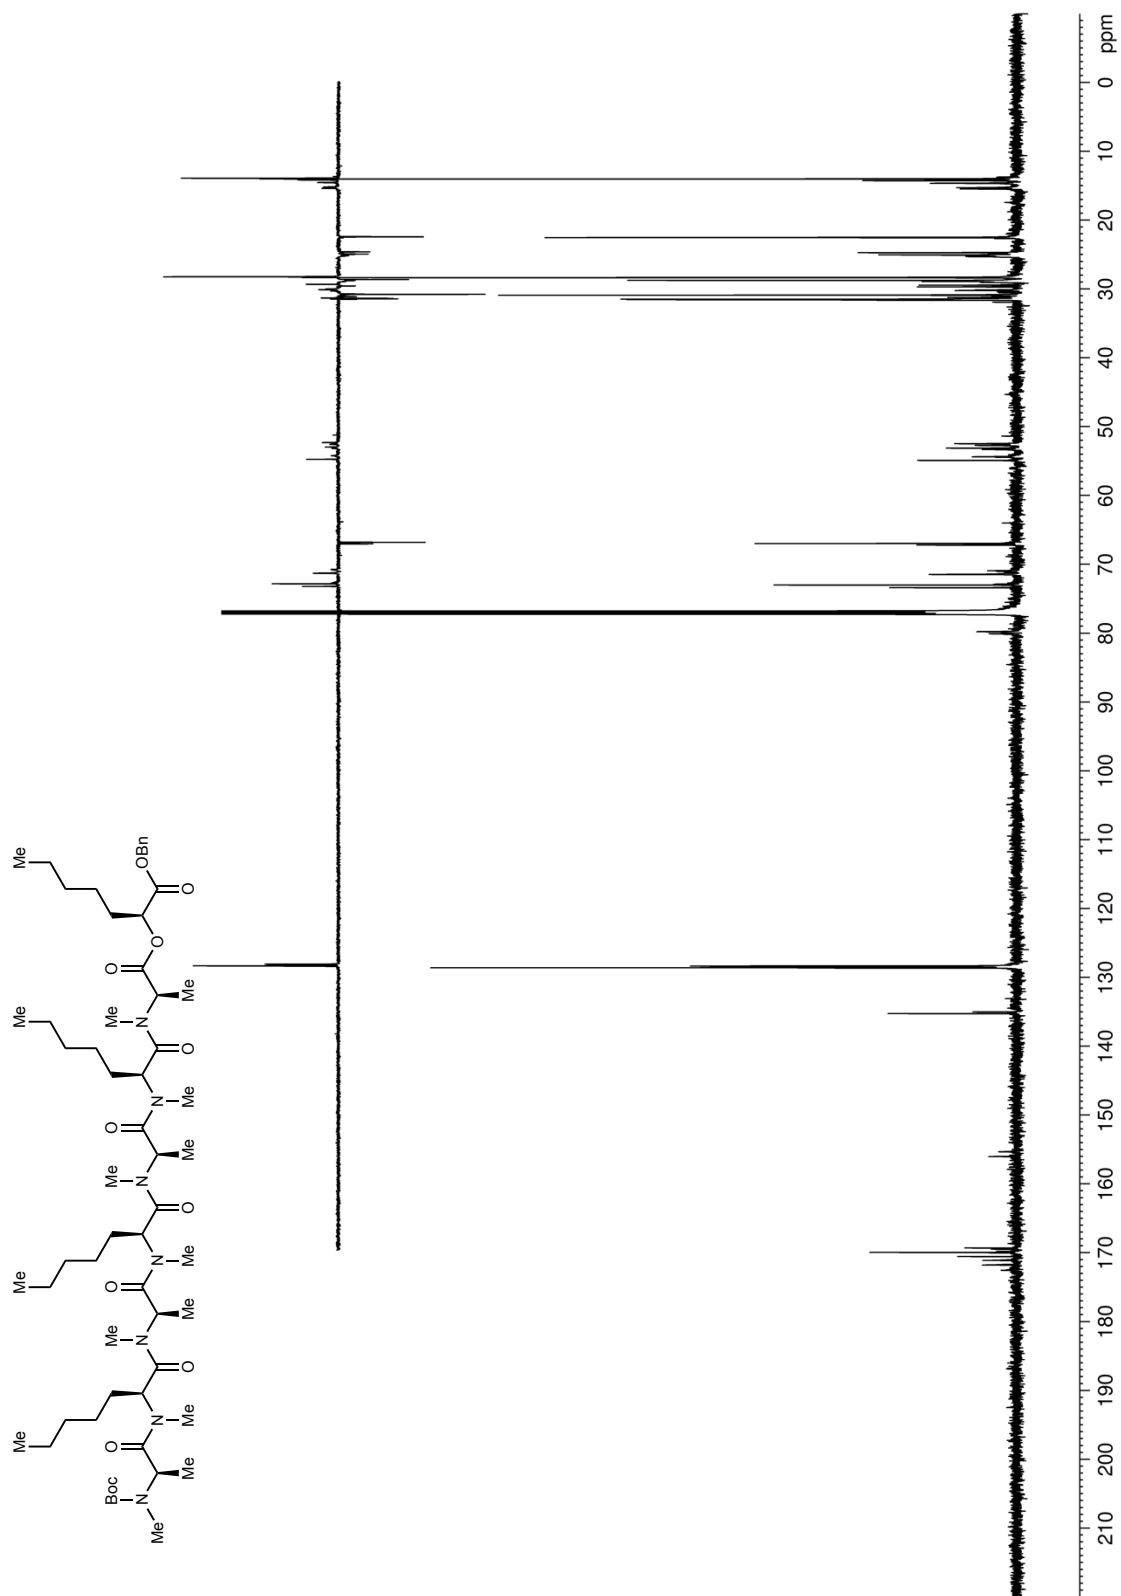



Figure S65.  $^1\text{H}$  NMR (600 MHz,  $\text{CDCl}_3$ ) of **O65**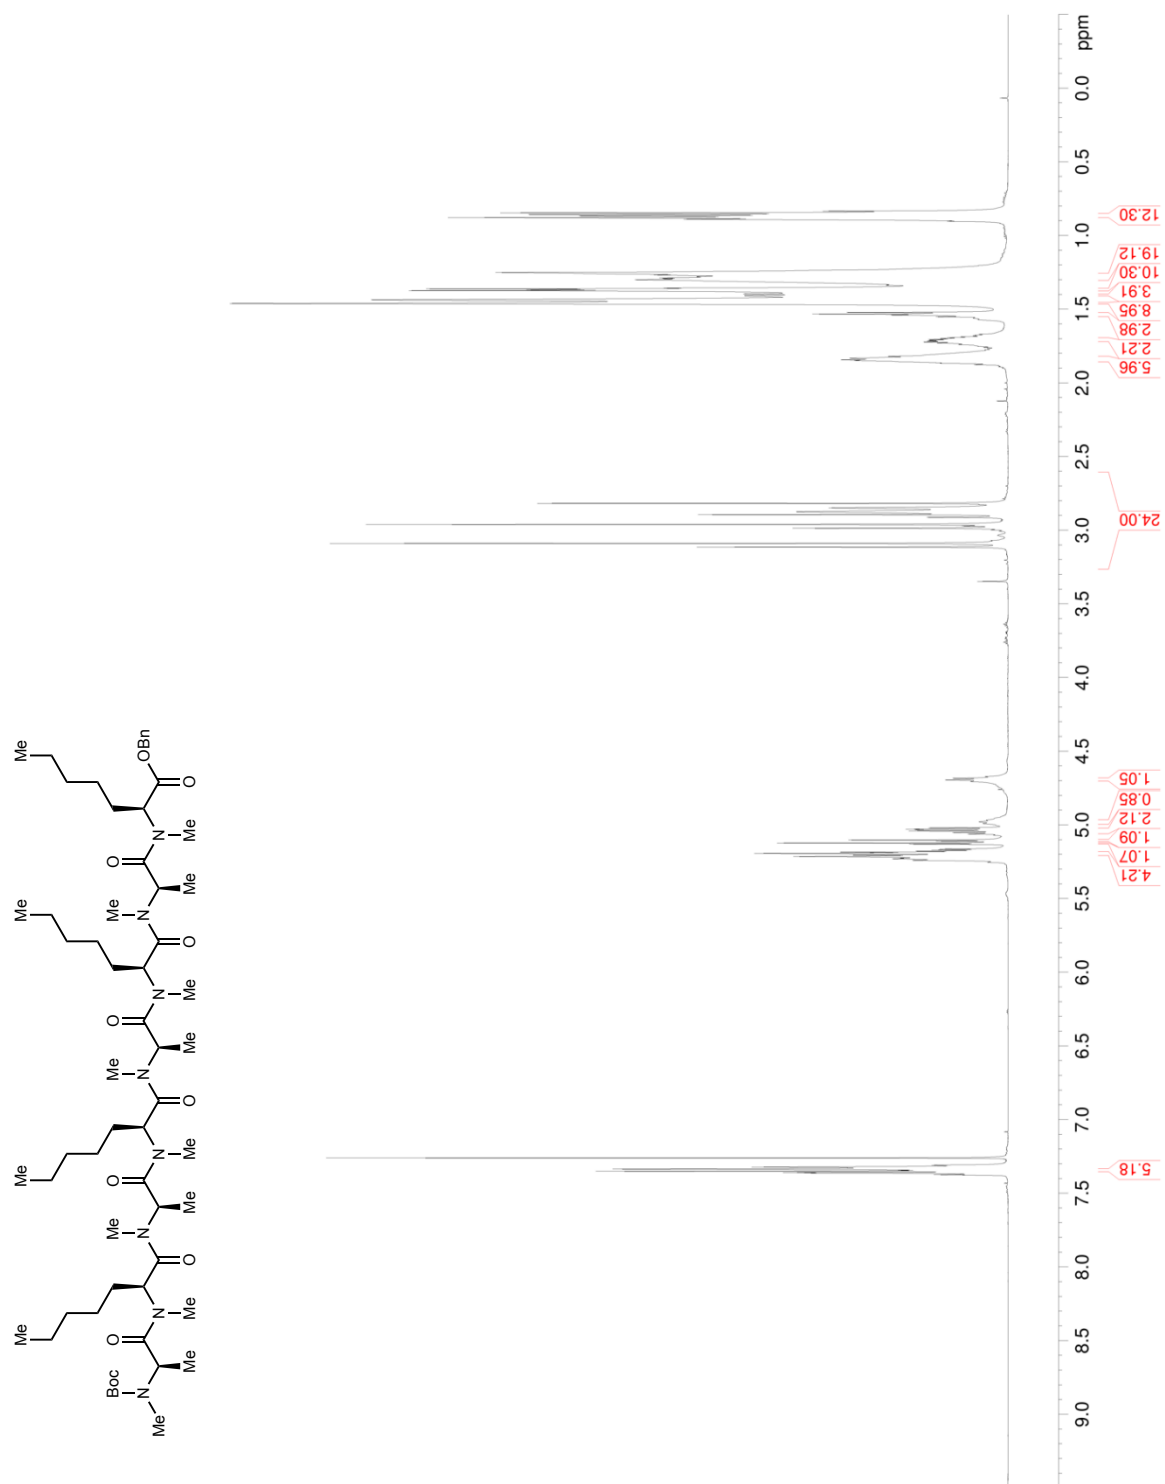

Figure S66.  $^{13}\text{C}$  NMR (150 MHz,  $\text{CDCl}_3$ ) of O65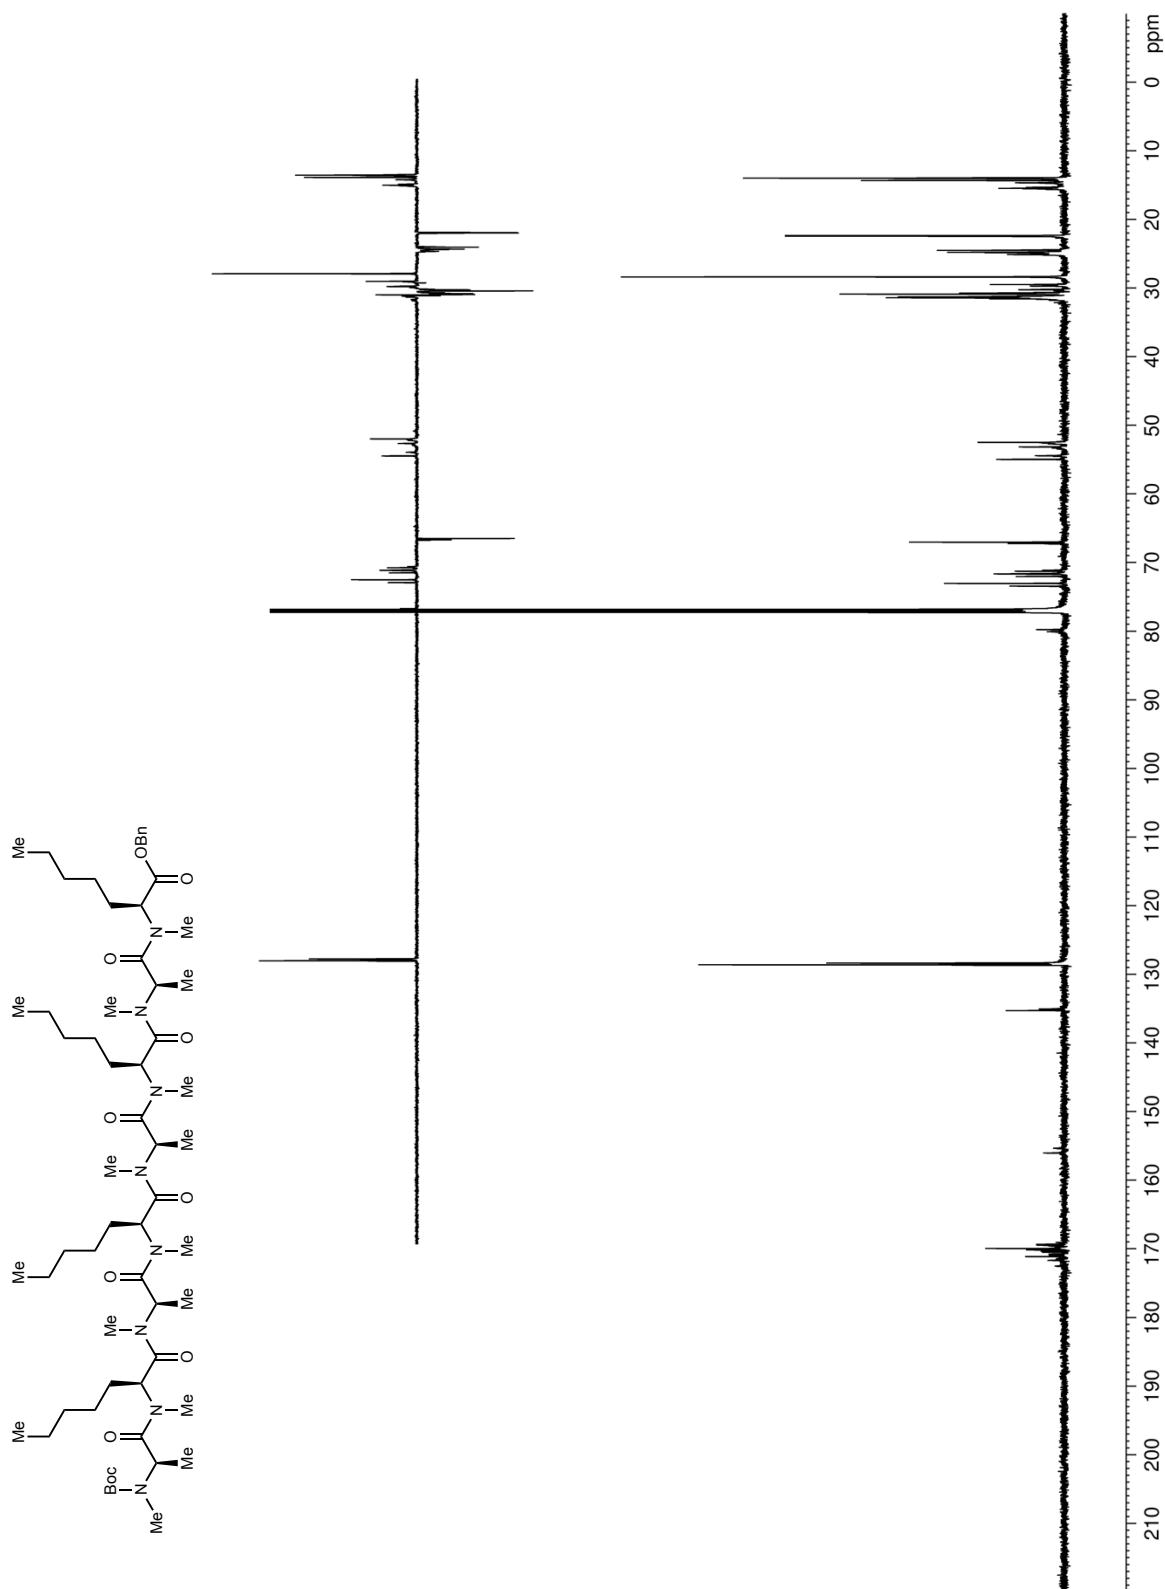



Figure S68.  $^{13}\text{C}$  NMR (150 MHz,  $\text{CDCl}_3$ ) of O66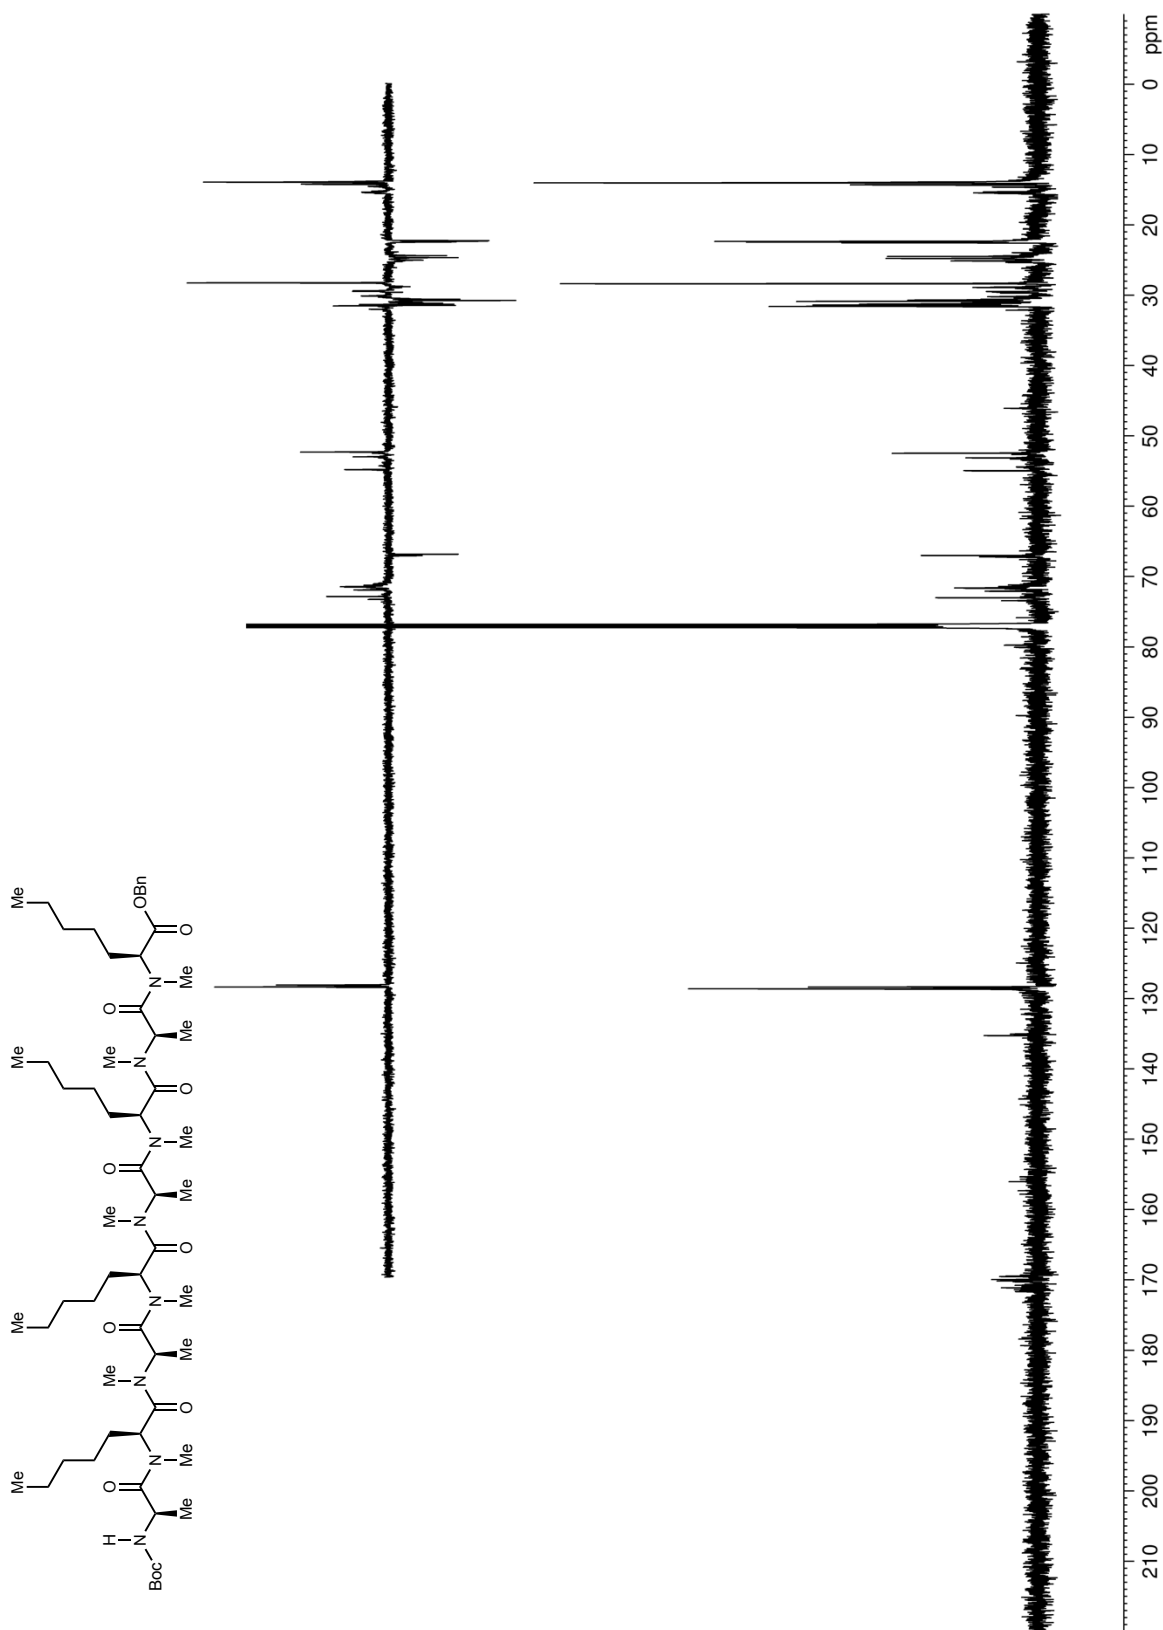

Figure S69.  $^1\text{H}$  NMR (600 MHz,  $\text{CDCl}_3$ ) of **O67**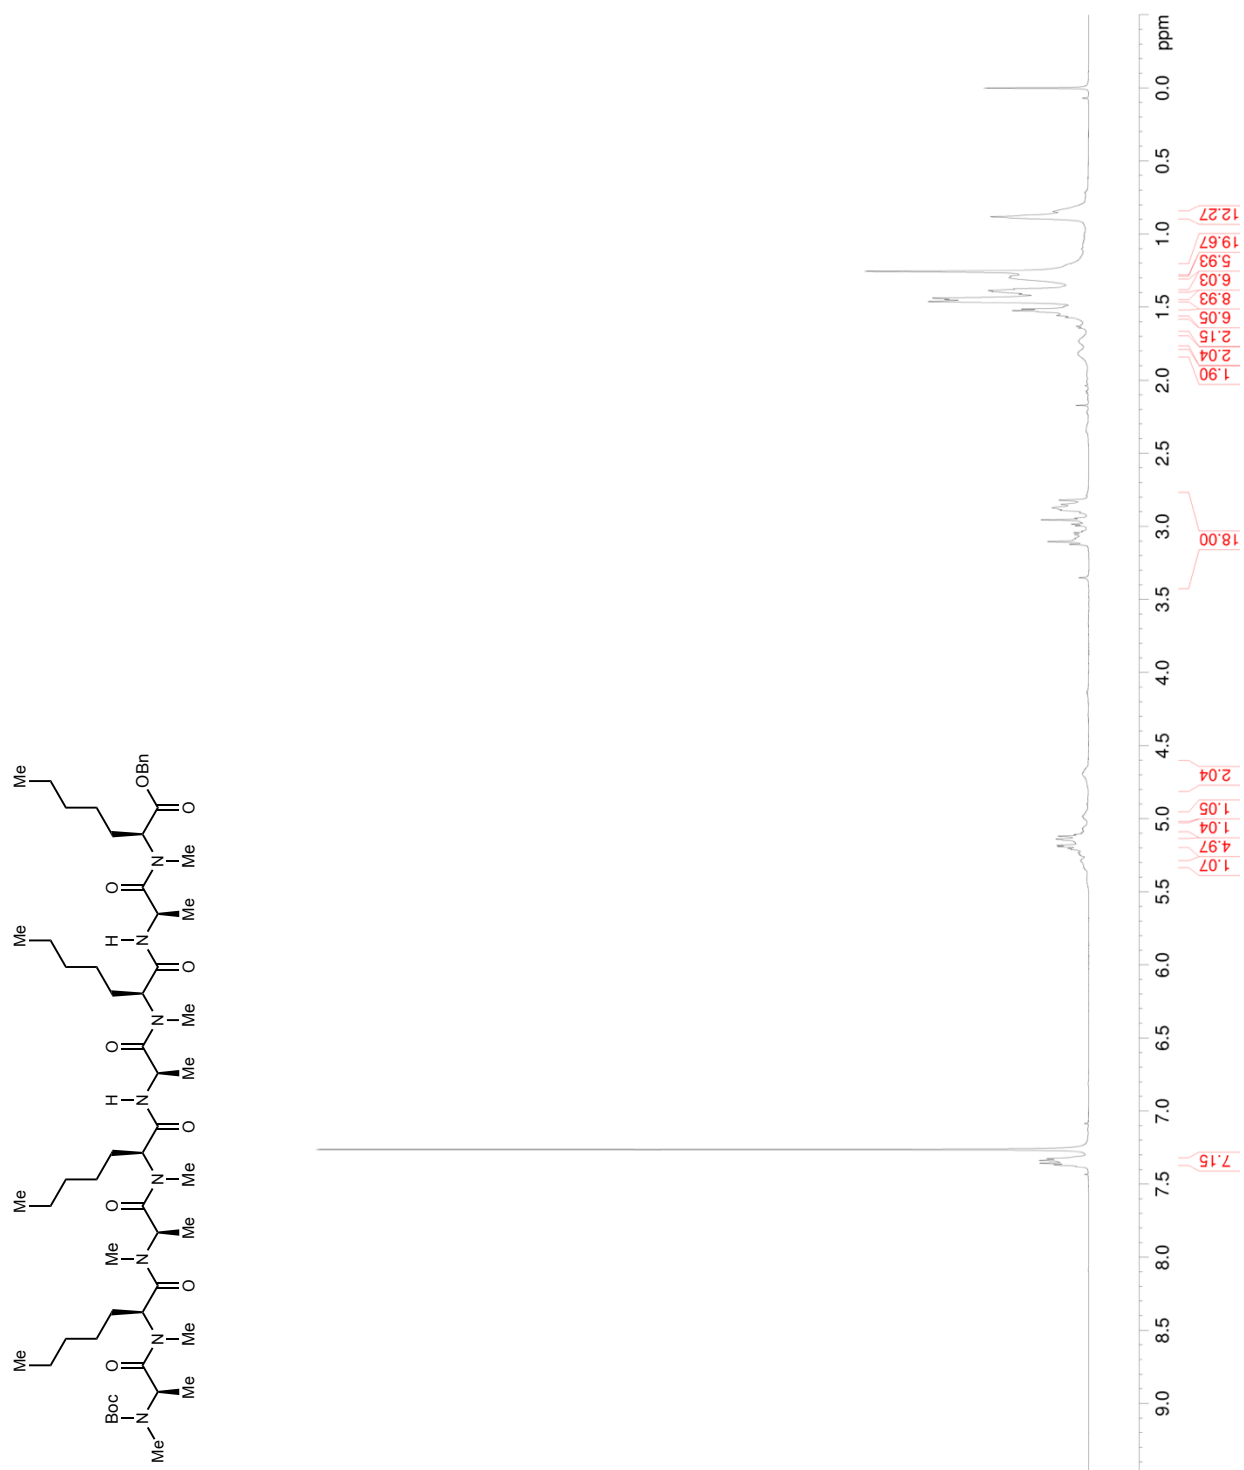

Figure S70.  $^{13}\text{C}$  NMR (150 MHz,  $\text{CDCl}_3$ ) of **O67**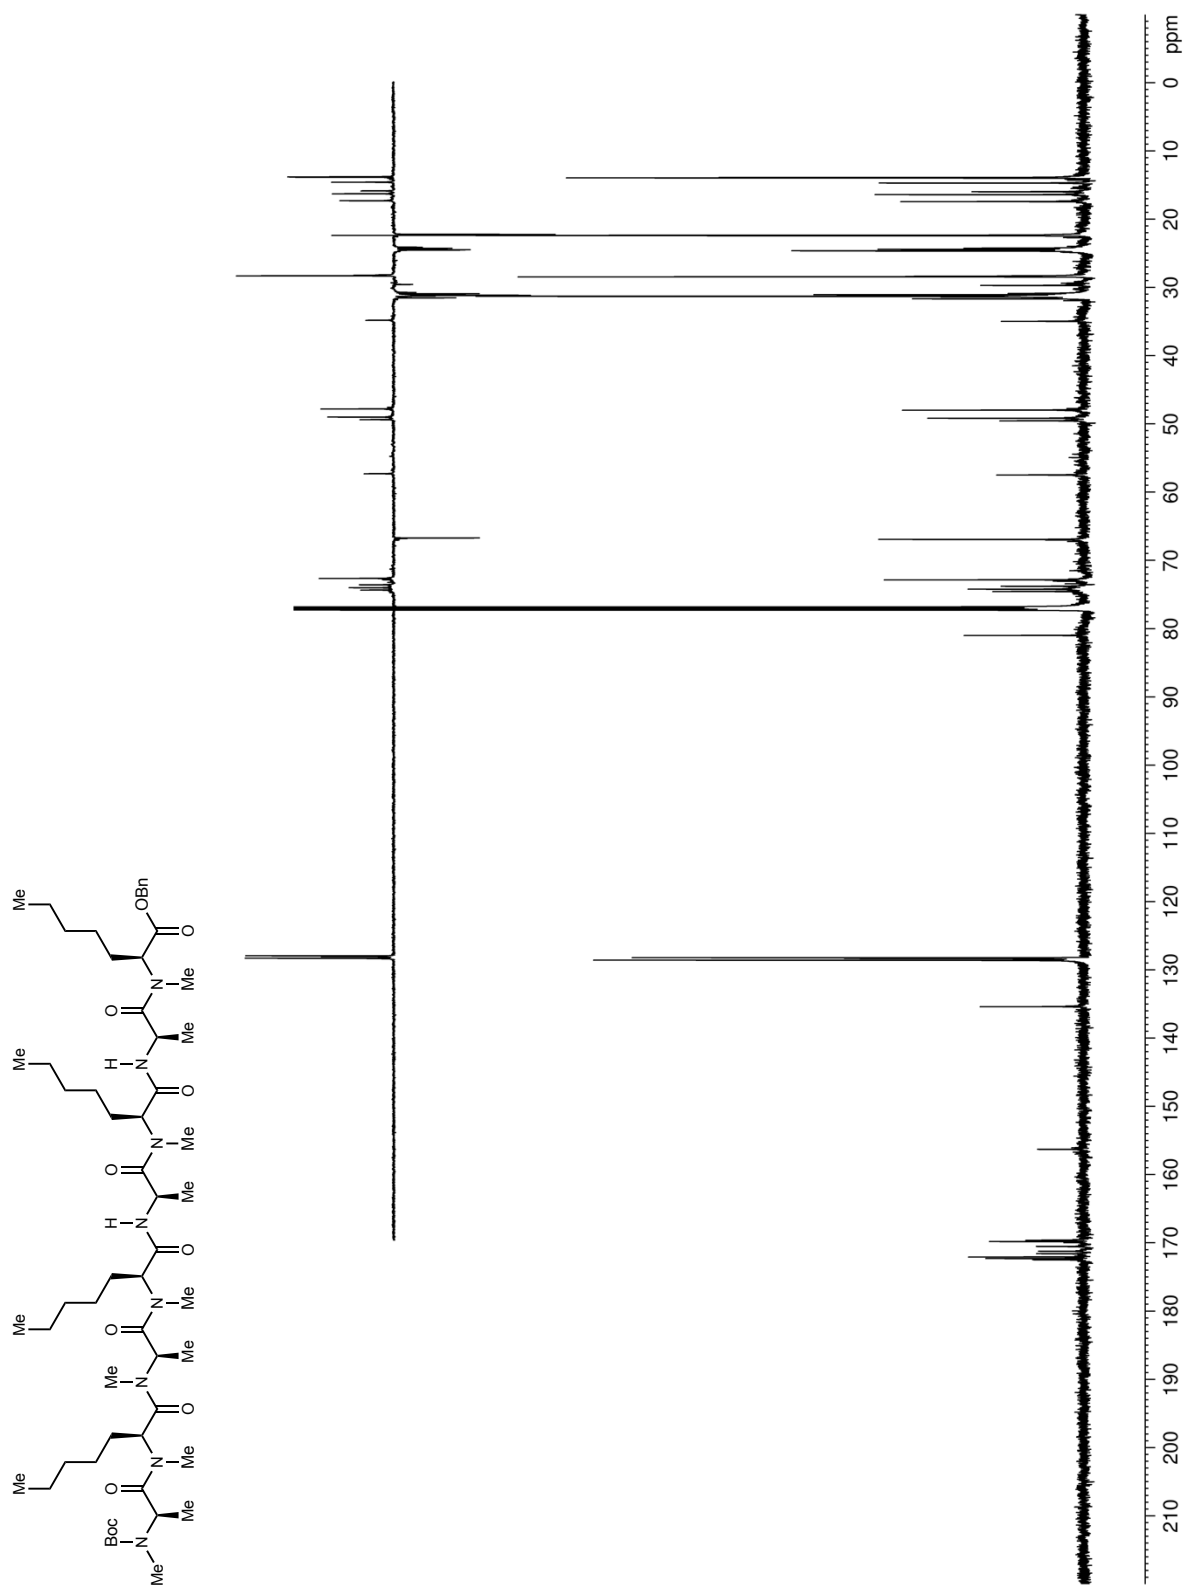

Figure S71.  $^1\text{H}$  NMR (600 MHz,  $\text{CDCl}_3$ ) of **O68**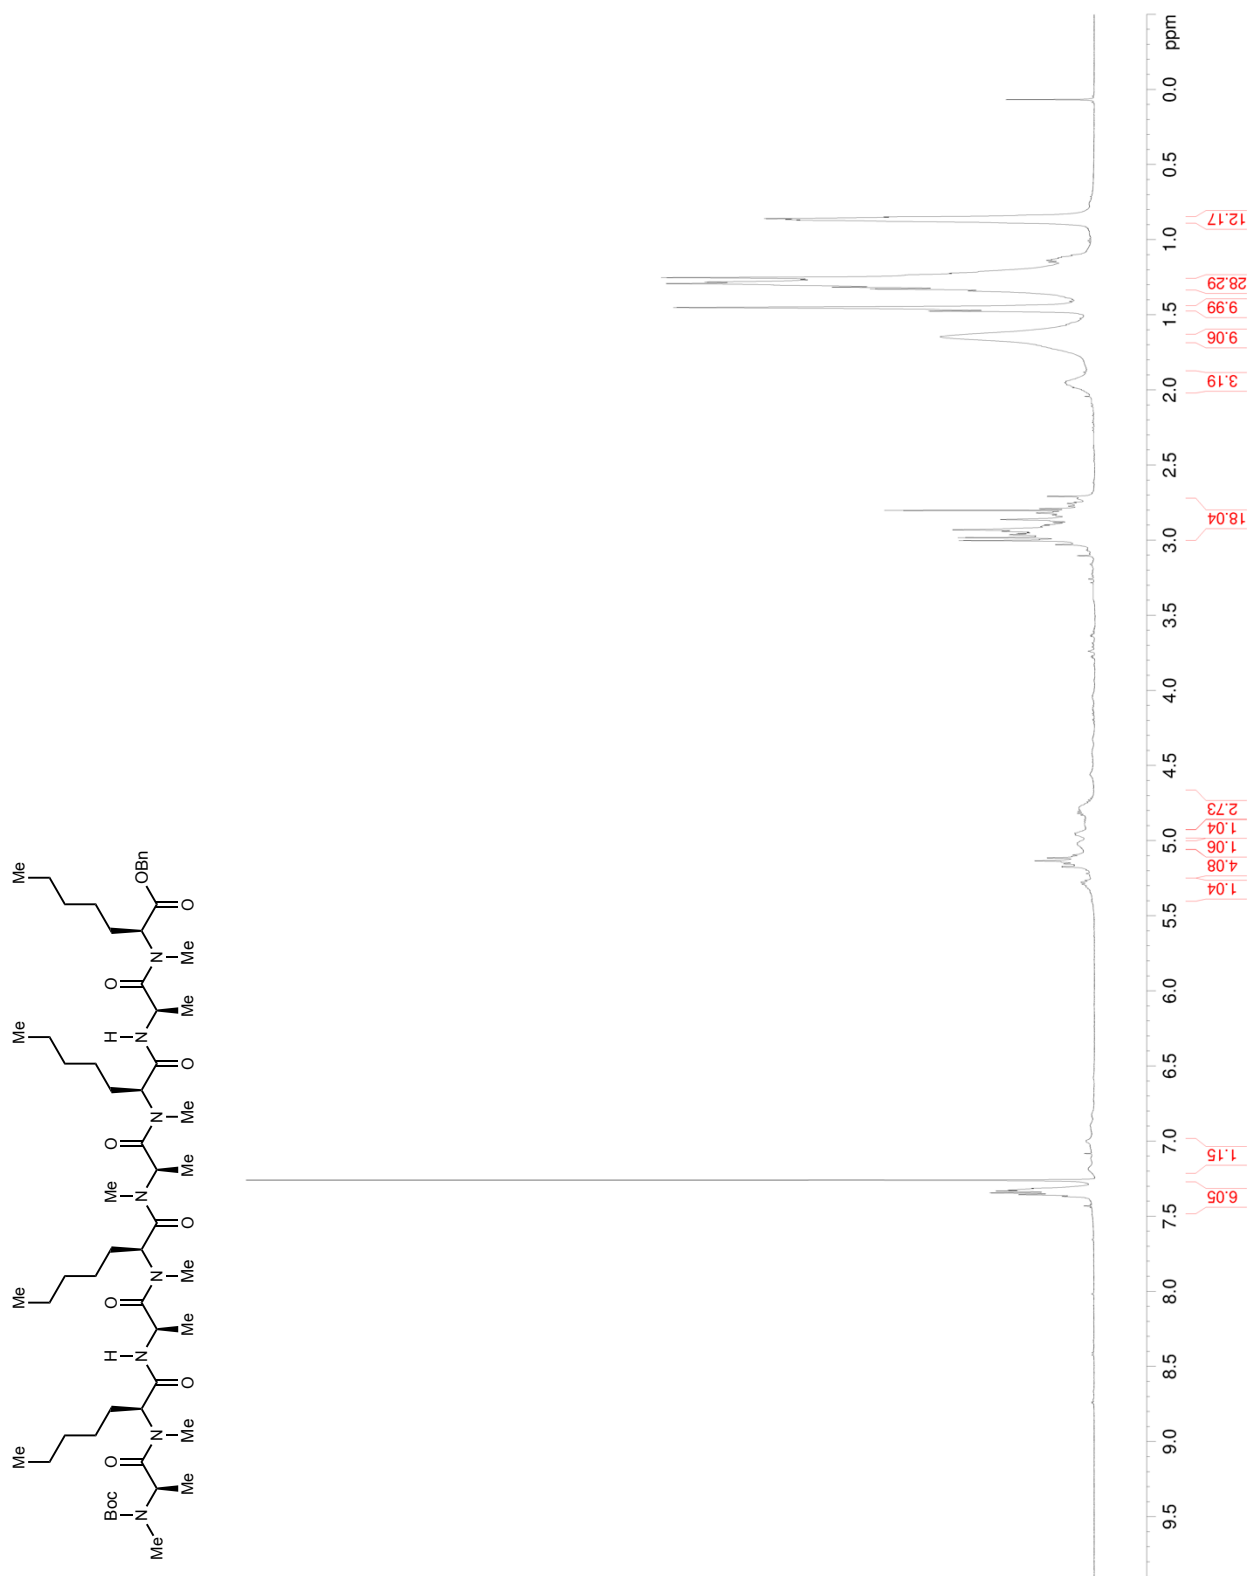

Figure S72.  $^{13}\text{C}$  NMR (150 MHz,  $\text{CDCl}_3$ ) of O68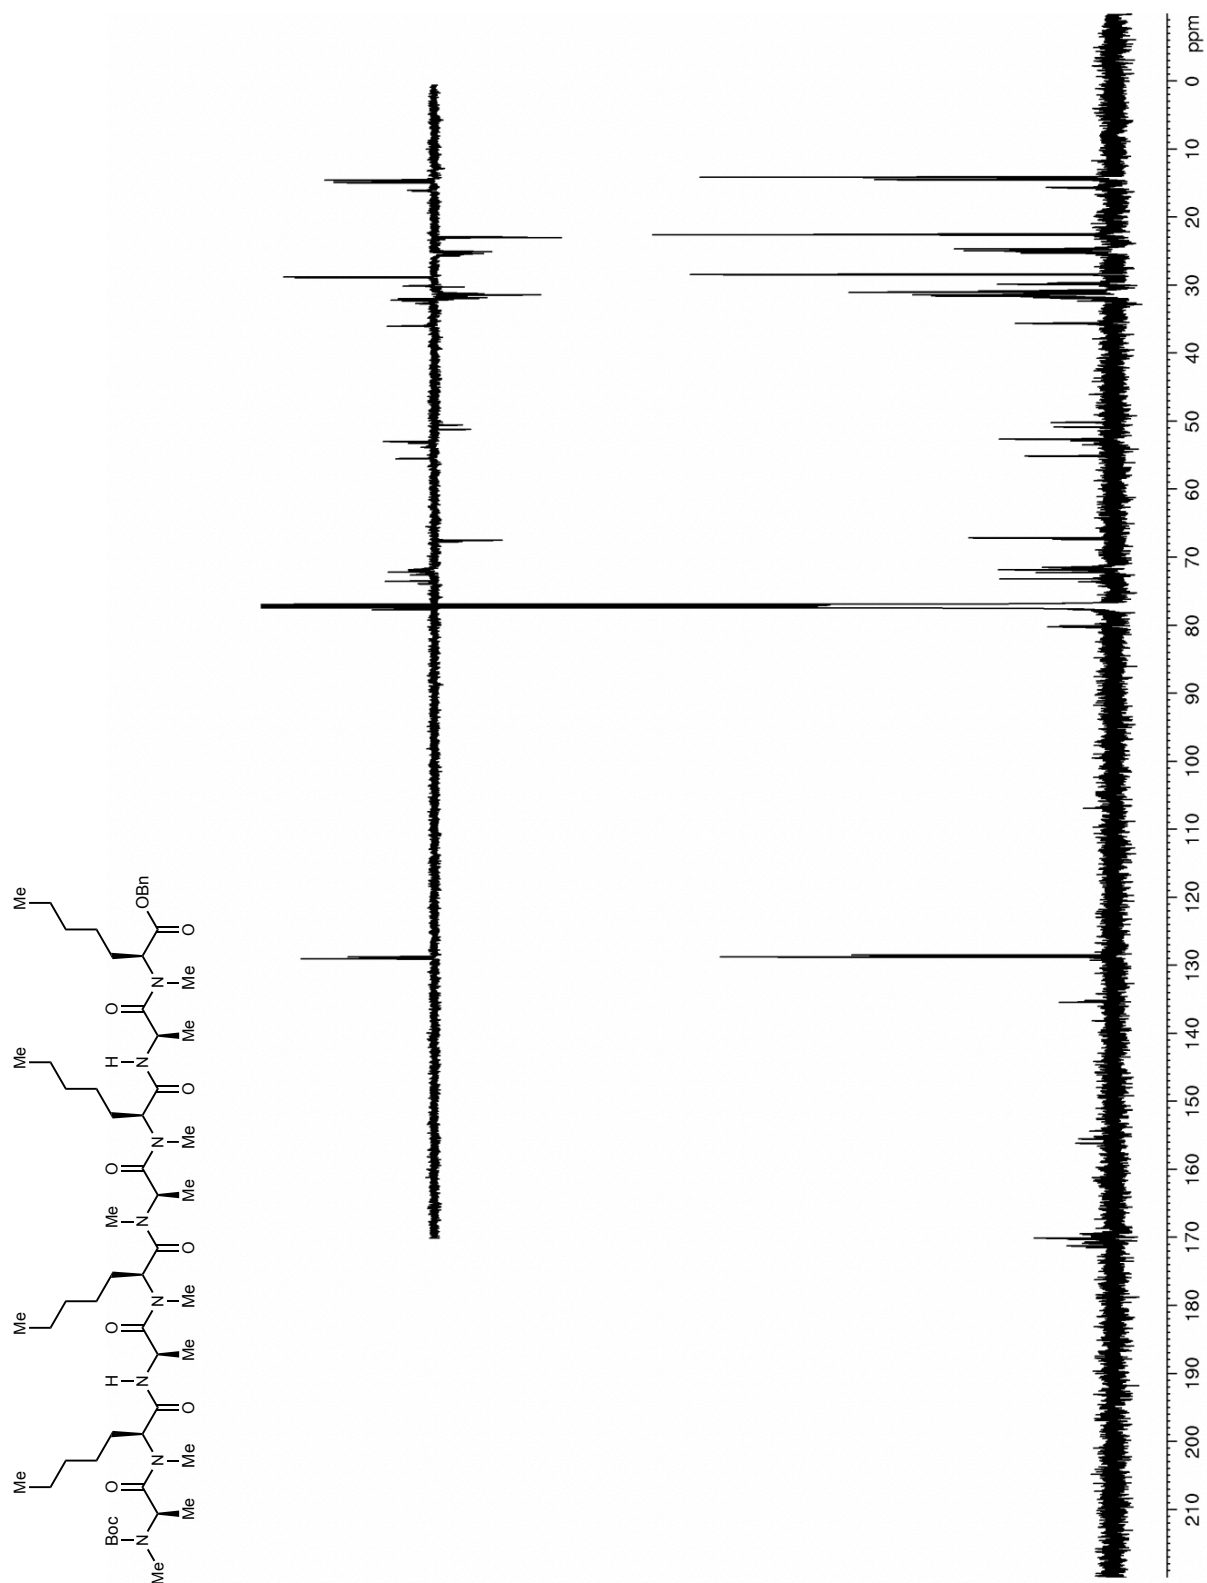





Figure S74.  $^{13}\text{C}$  NMR (150 MHz,  $\text{CDCl}_3$ ) of O69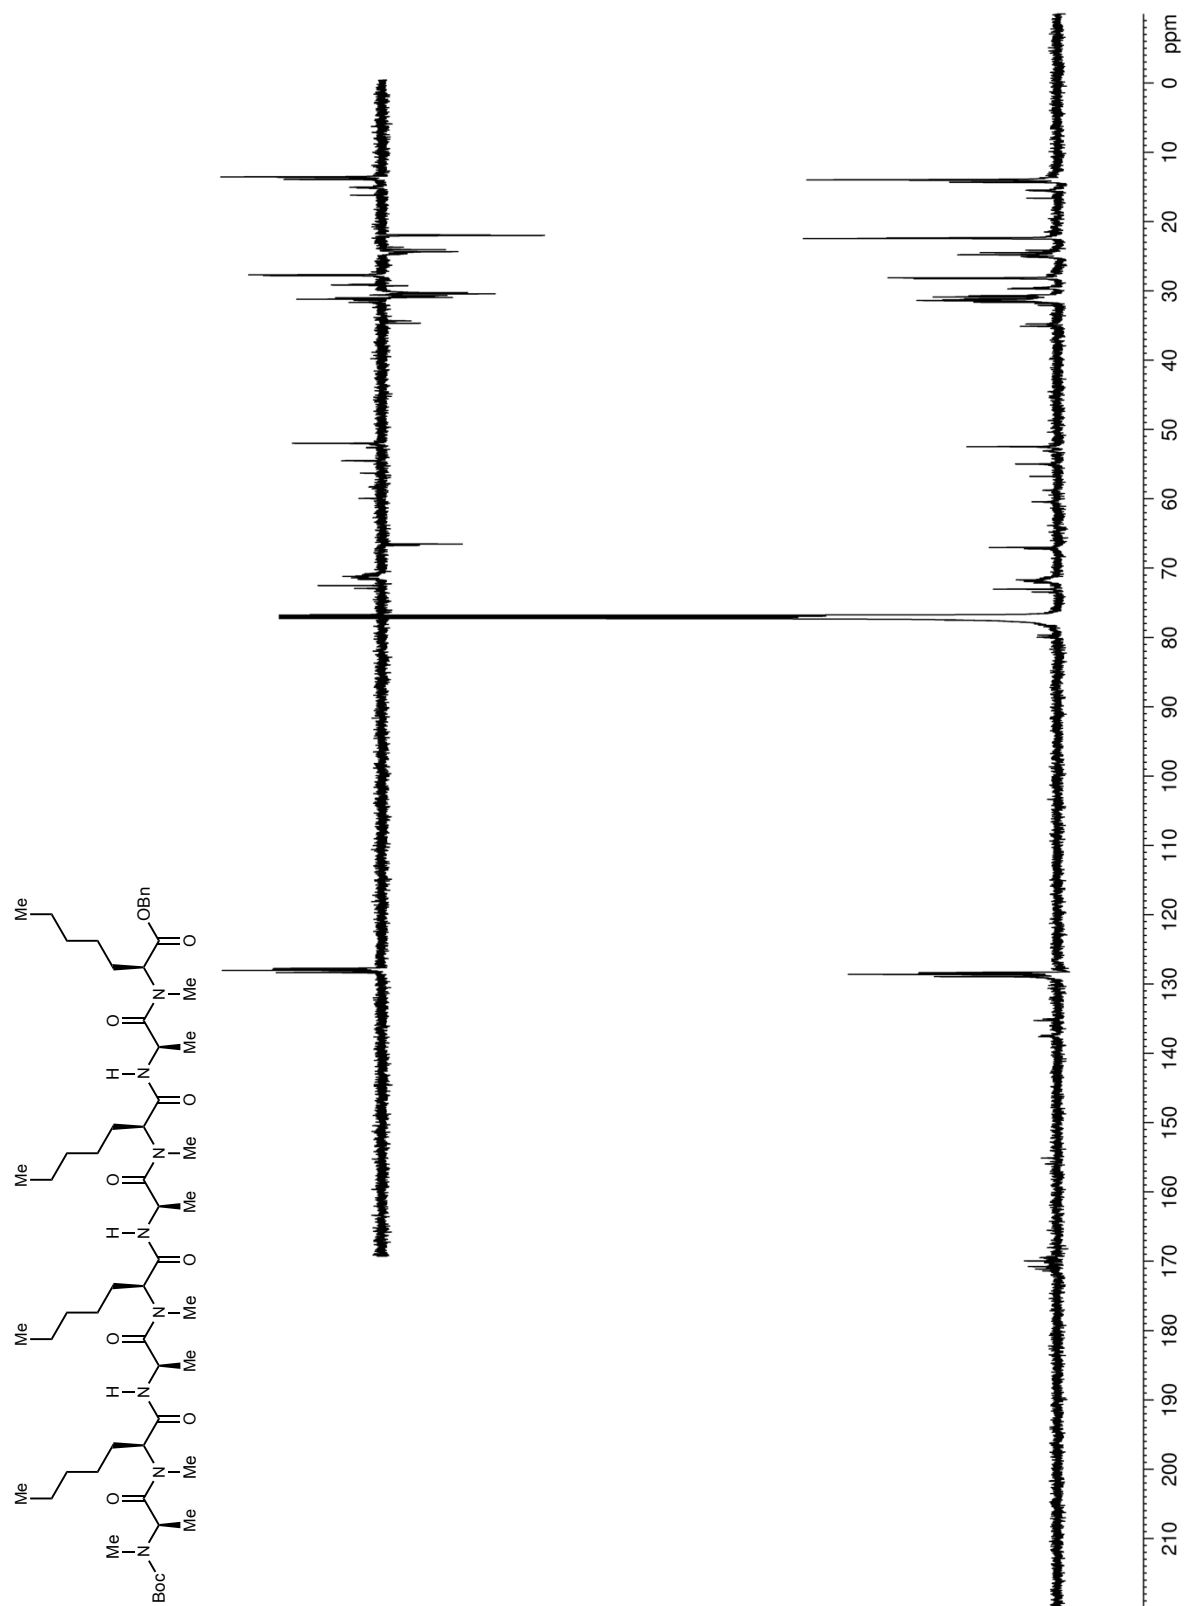

Figure S75.  $^1\text{H}$  NMR (600 MHz,  $\text{CDCl}_3$ ) of **O70**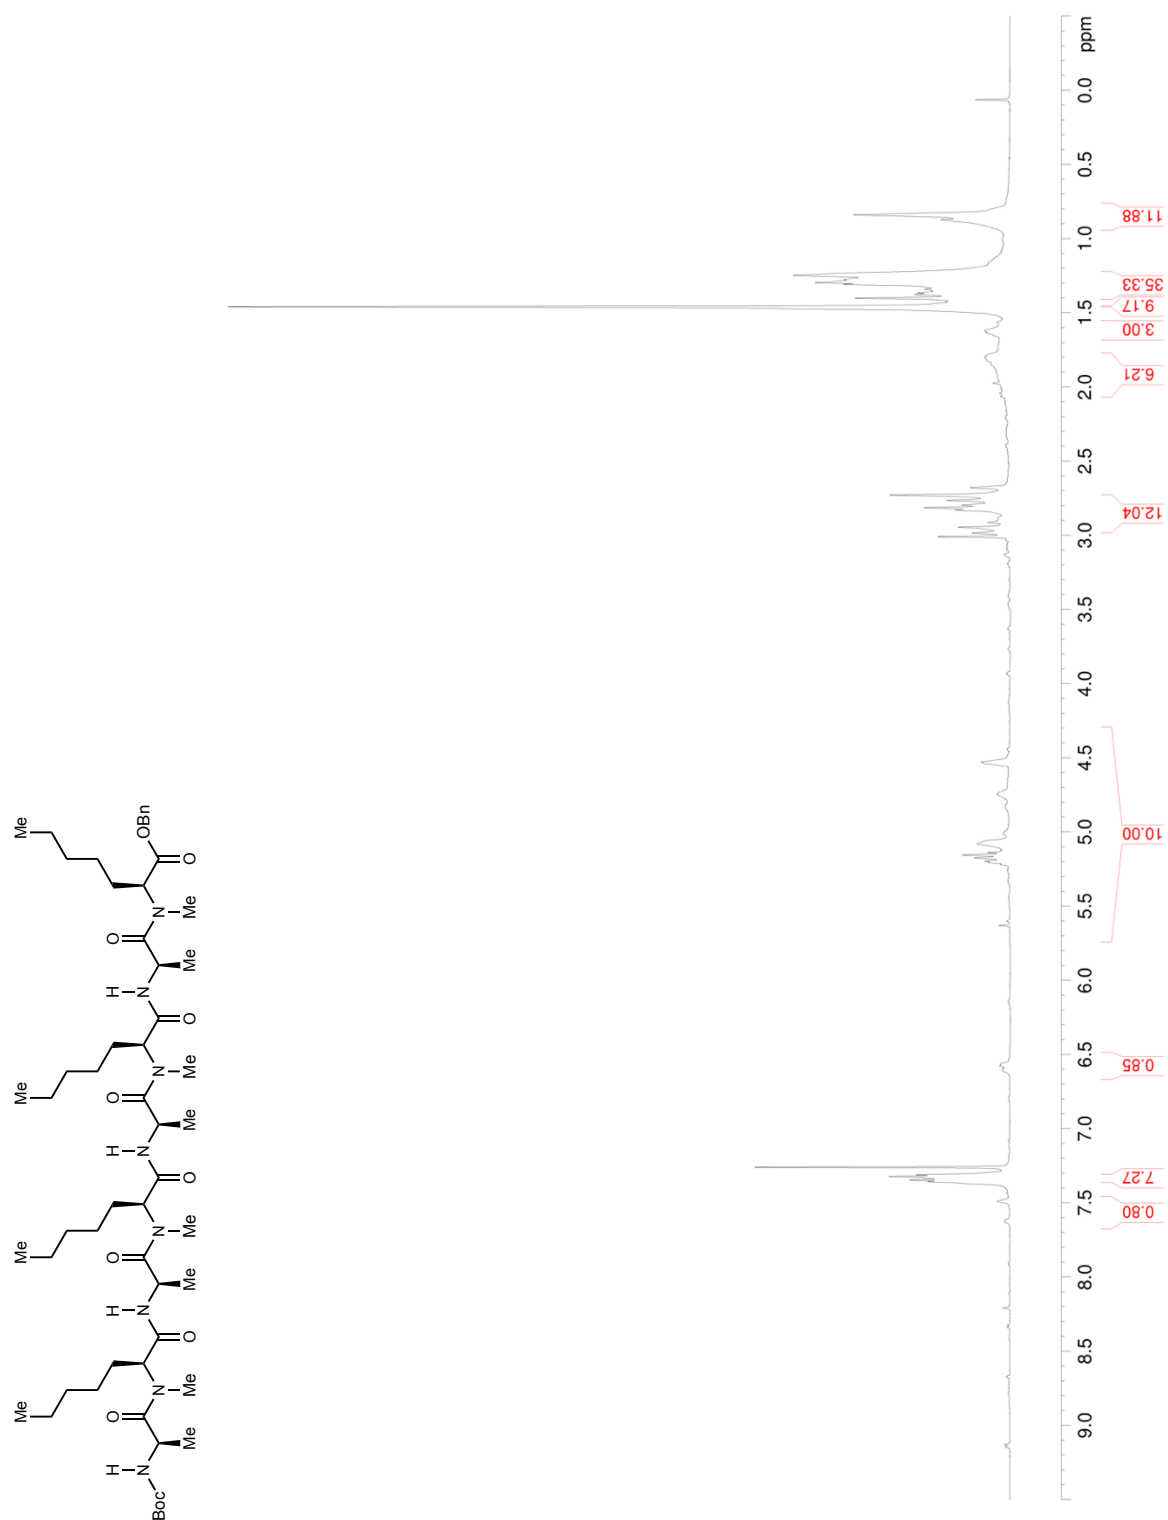

Figure S76.  $^{13}\text{C}$  NMR (150 MHz,  $\text{CDCl}_3$ ) of **O70**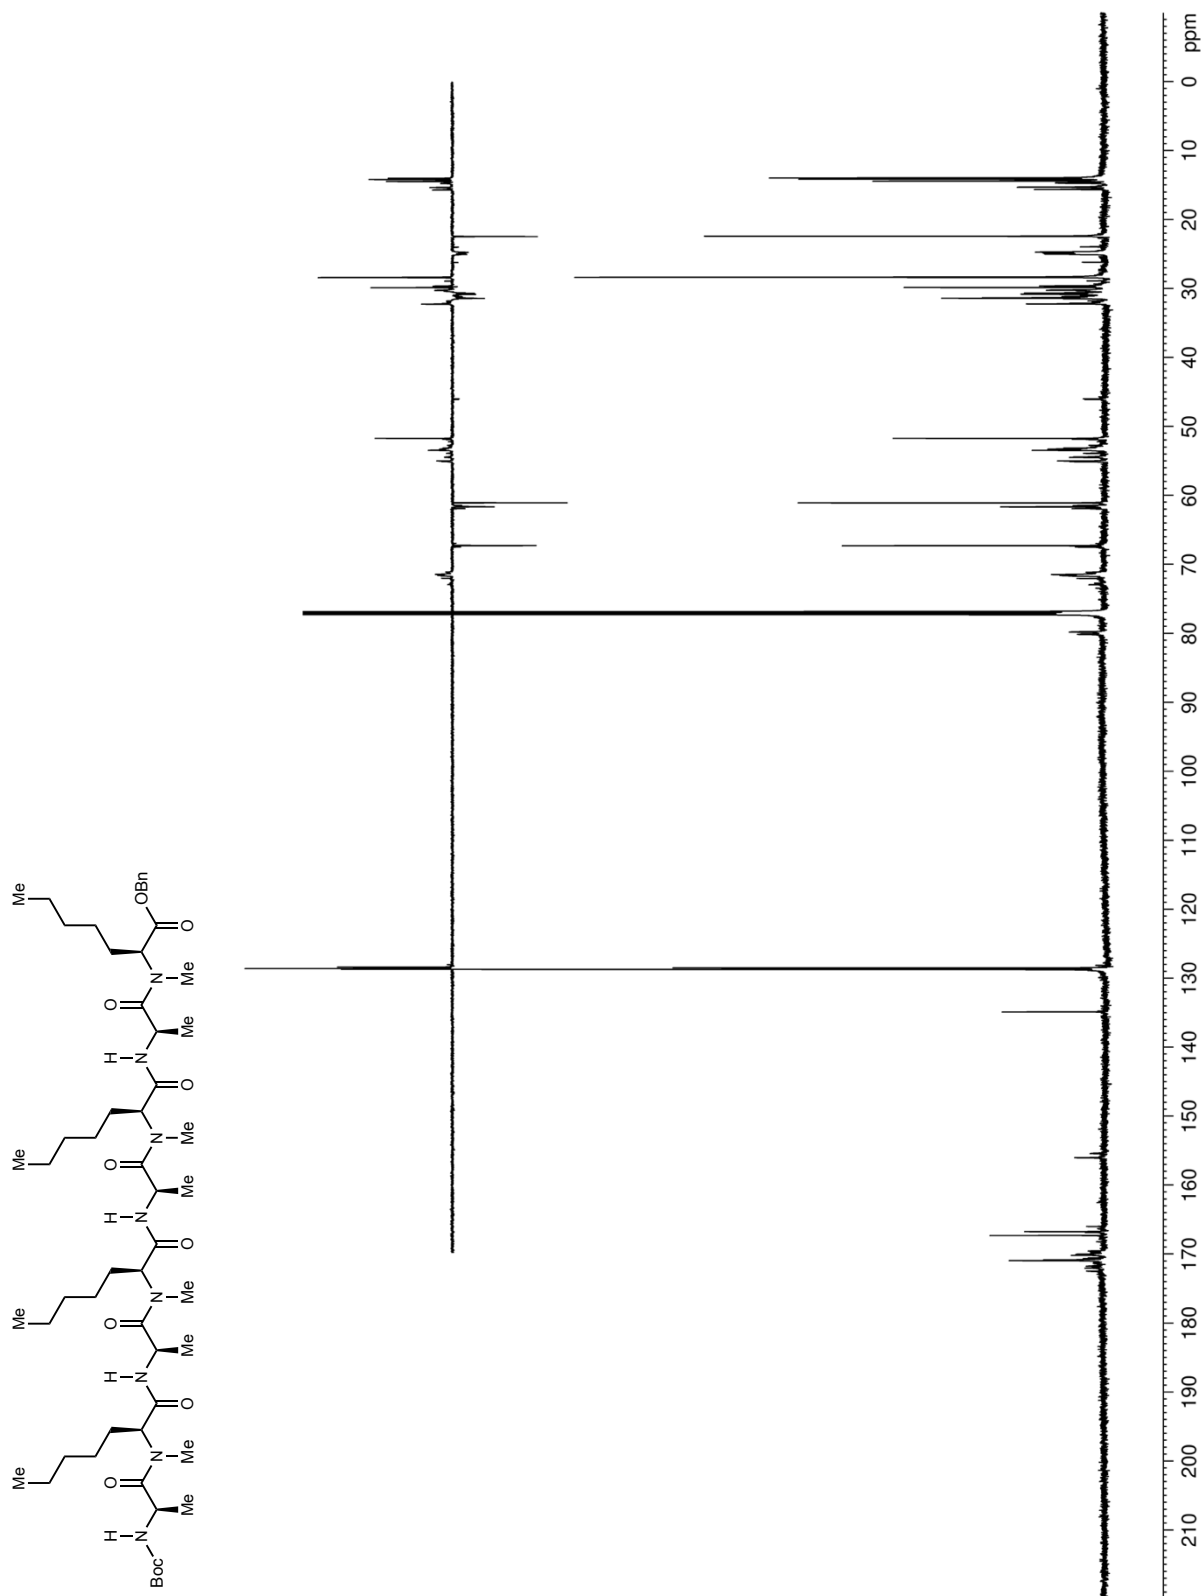

Figure S77.  $^1\text{H}$  NMR (600 MHz,  $\text{CDCl}_3$ ) of **O71**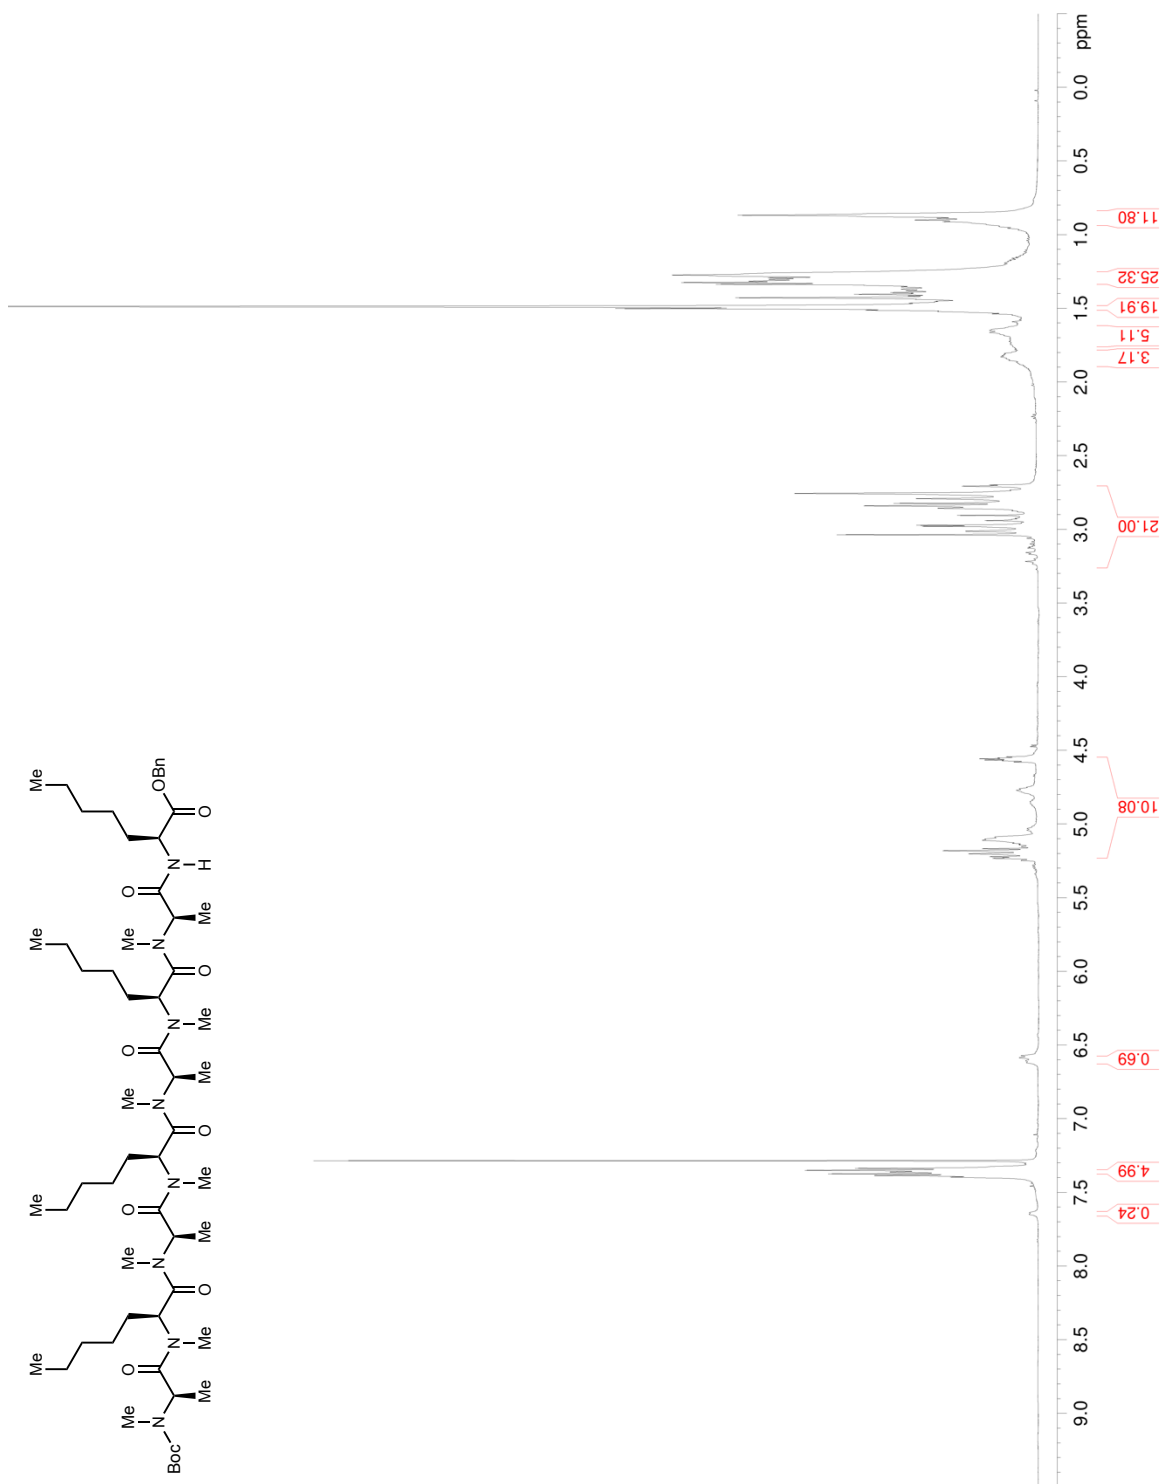

Figure S78.  $^{13}\text{C}$  NMR (150 MHz,  $\text{CDCl}_3$ ) of **O71**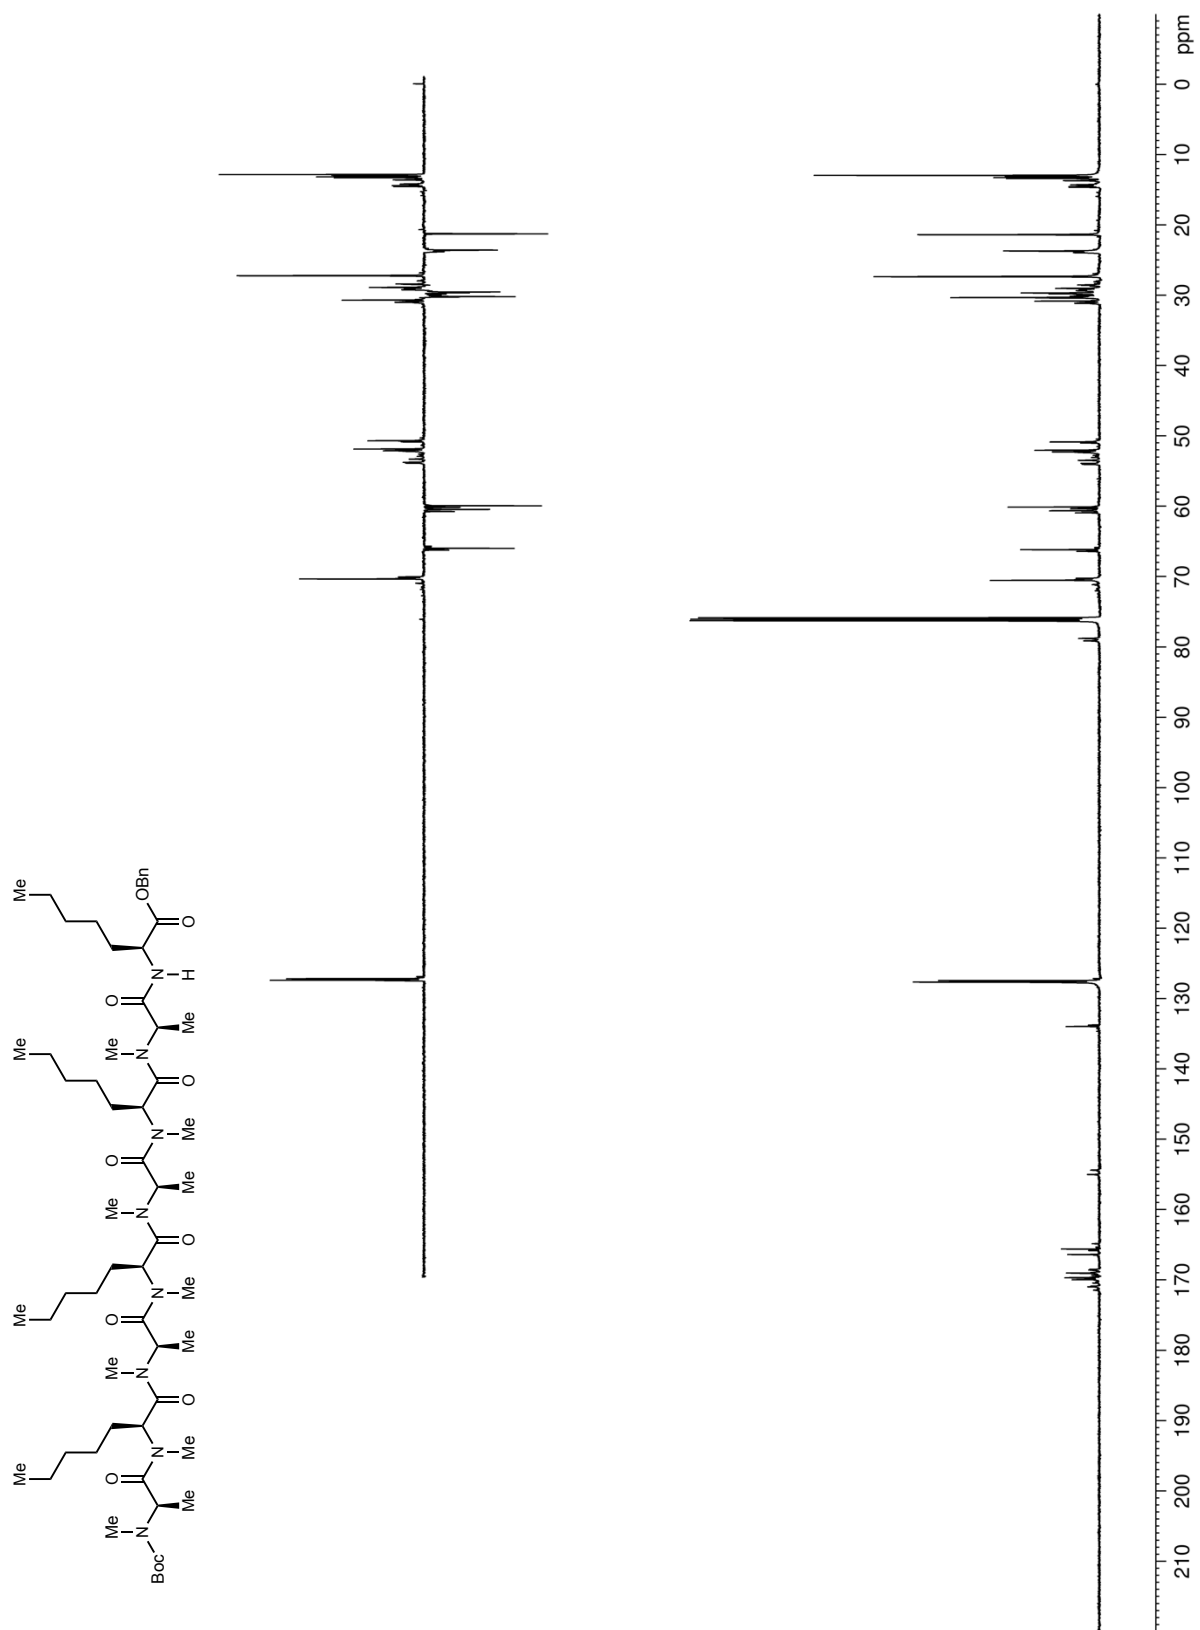

Figure S79.  $^1\text{H}$  NMR (600 MHz,  $\text{CD}_3\text{COCD}_3$ ) of **O72**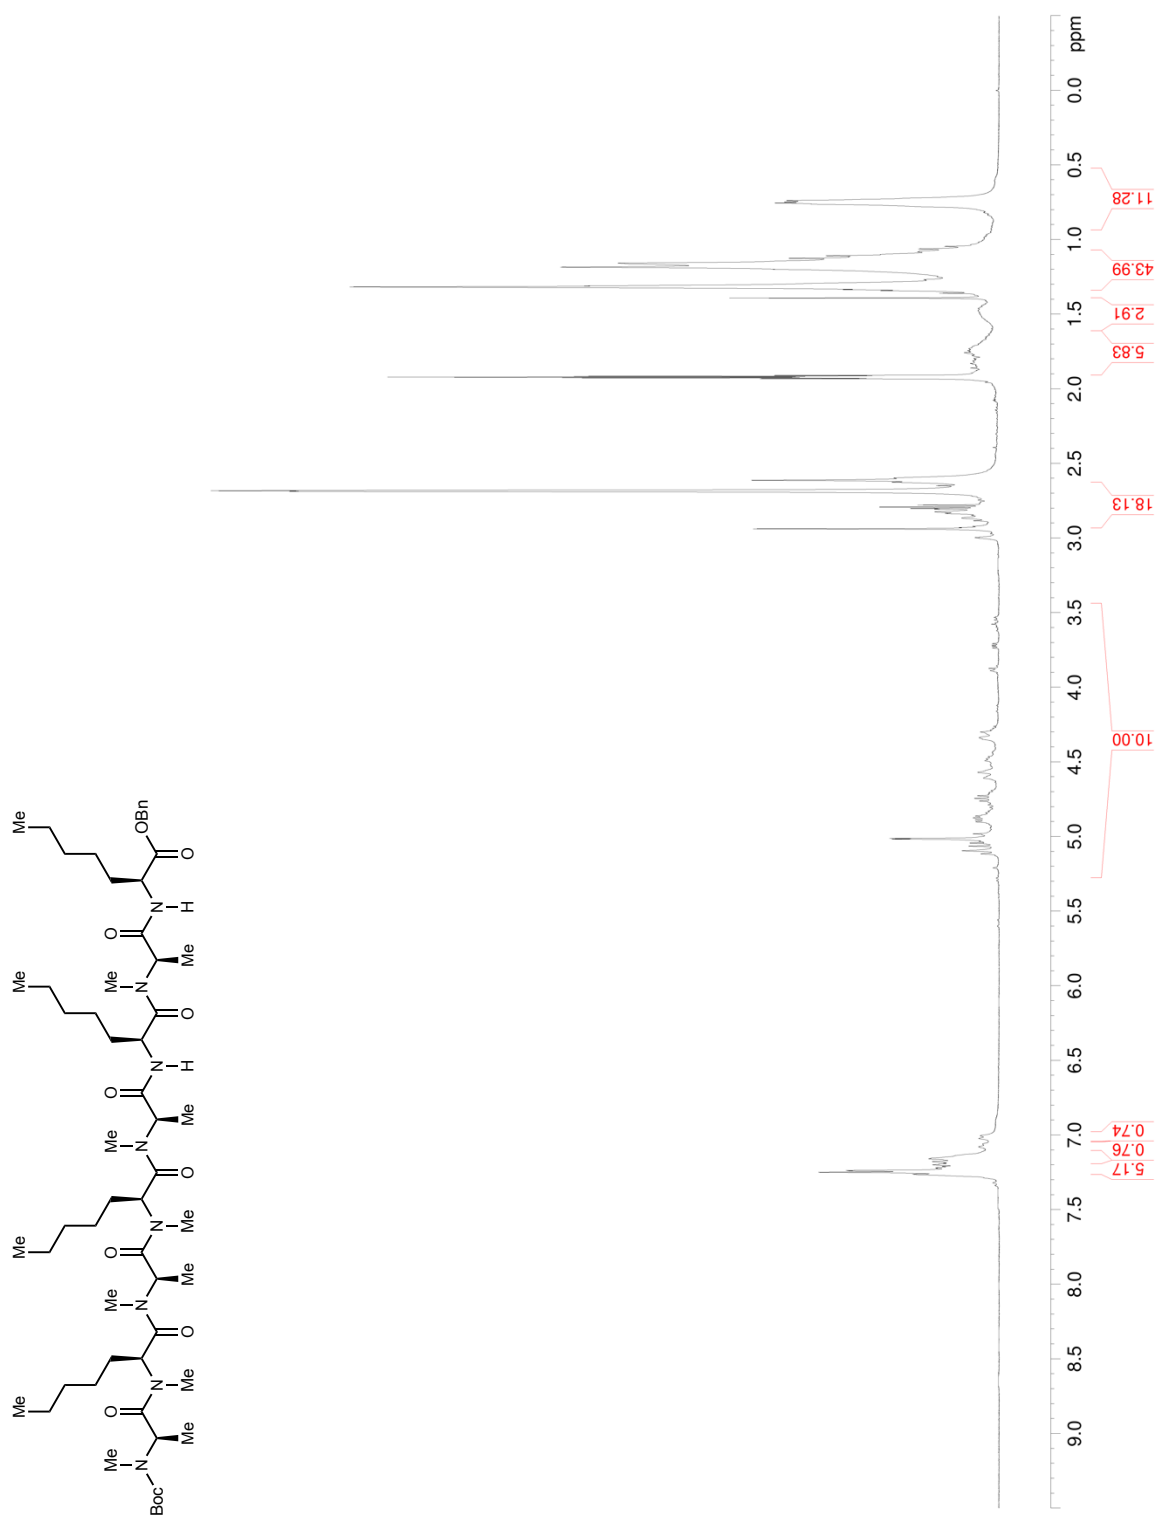

Figure S80.  $^{13}\text{C}$  NMR (150 MHz,  $\text{CDCl}_3$ ) of **O72**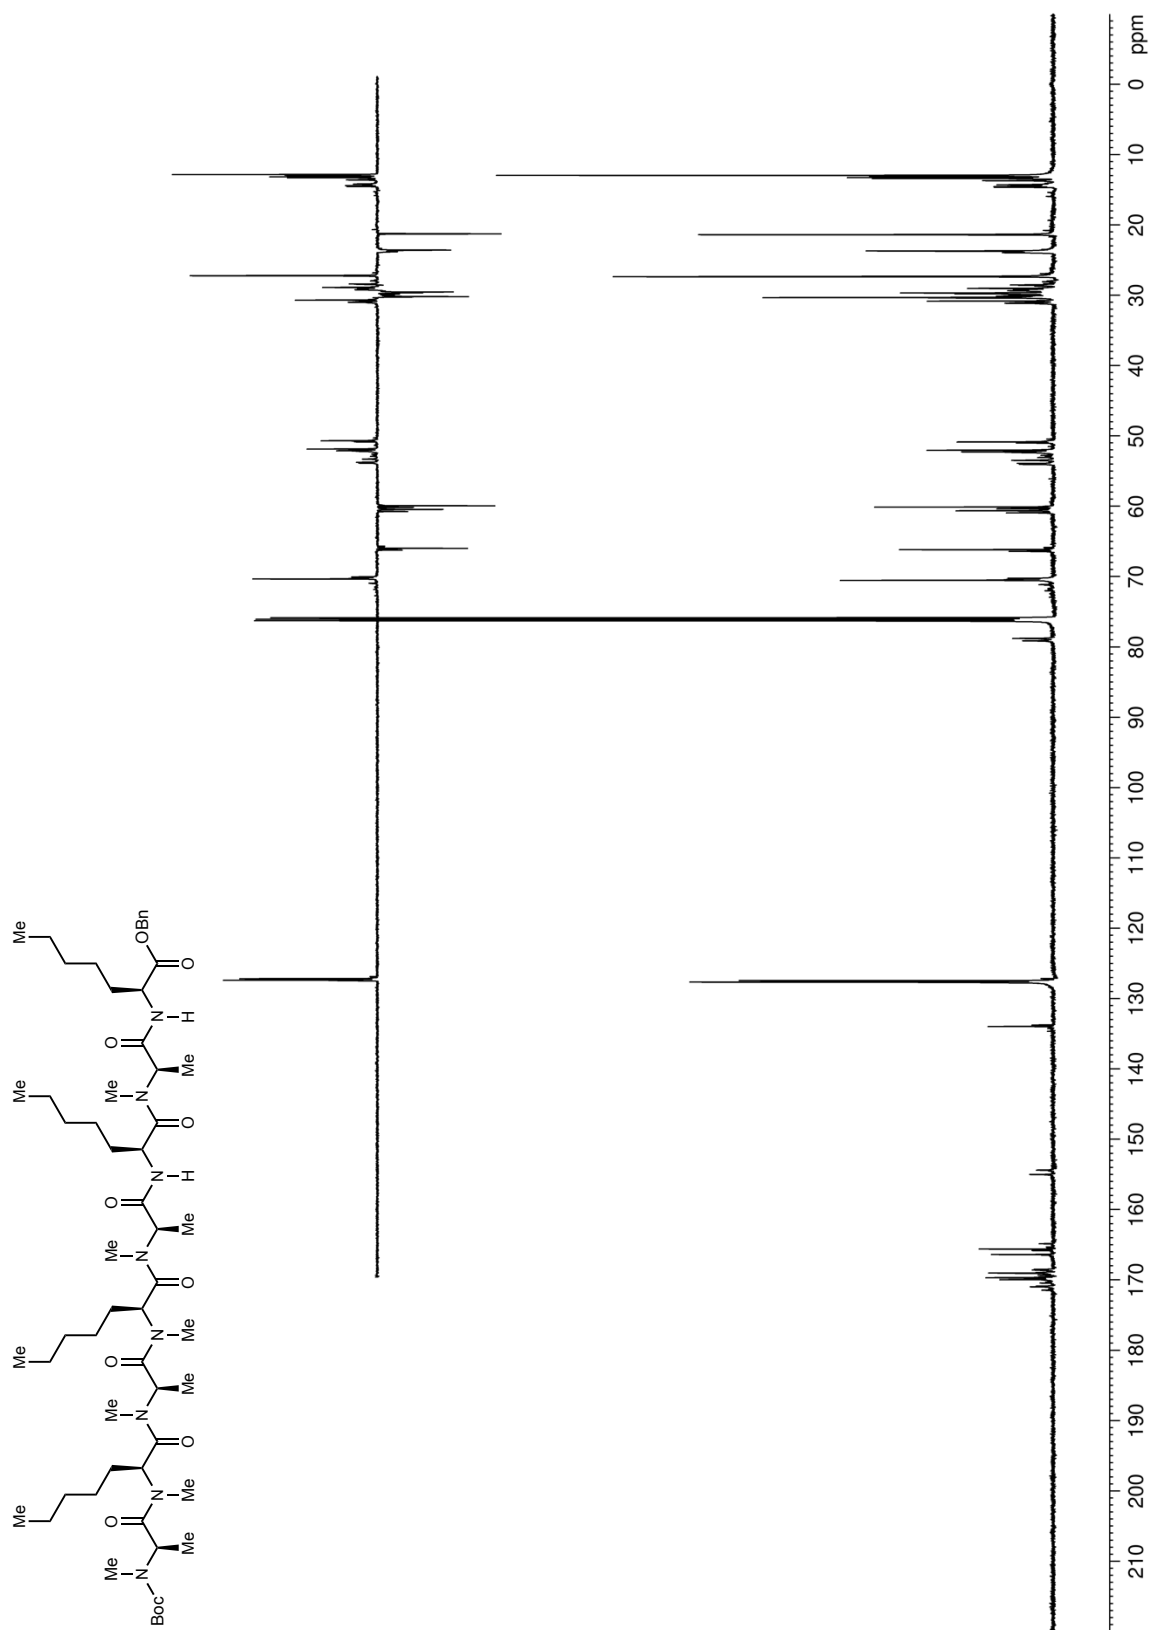



Figure S81.  $^1\text{H}$  NMR (600 MHz,  $\text{CDCl}_3$ ) of **O73**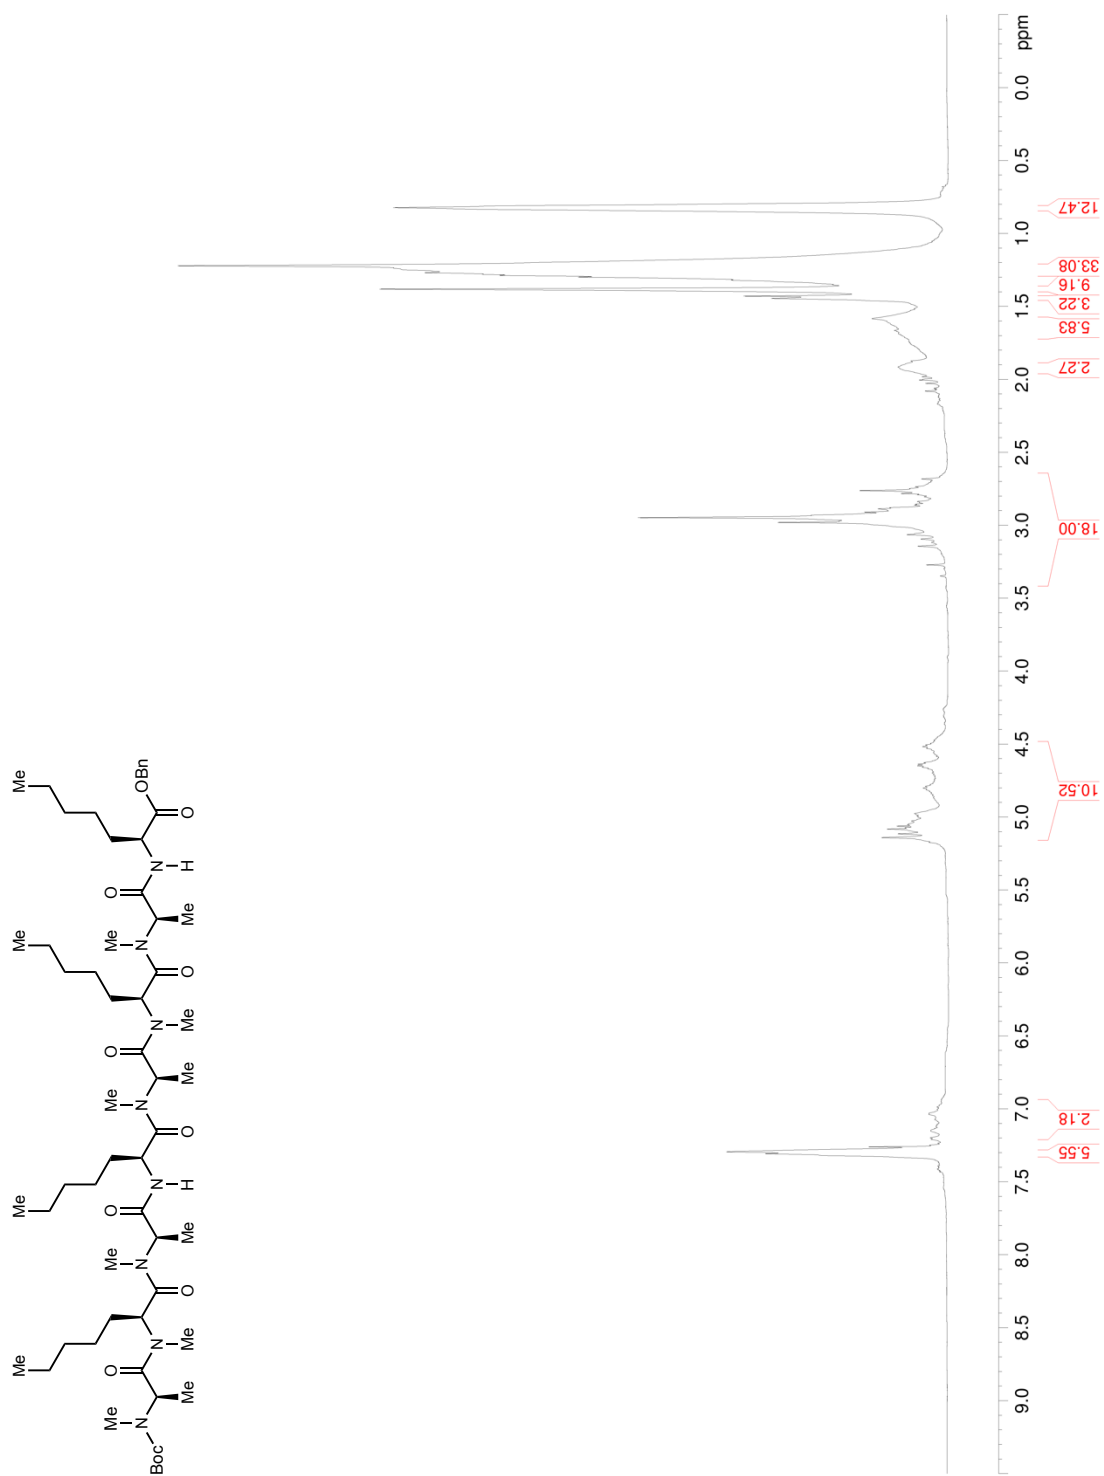

Figure S82.  $^{13}\text{C}$  NMR (150 MHz,  $\text{CDCl}_3$ ) of **O73**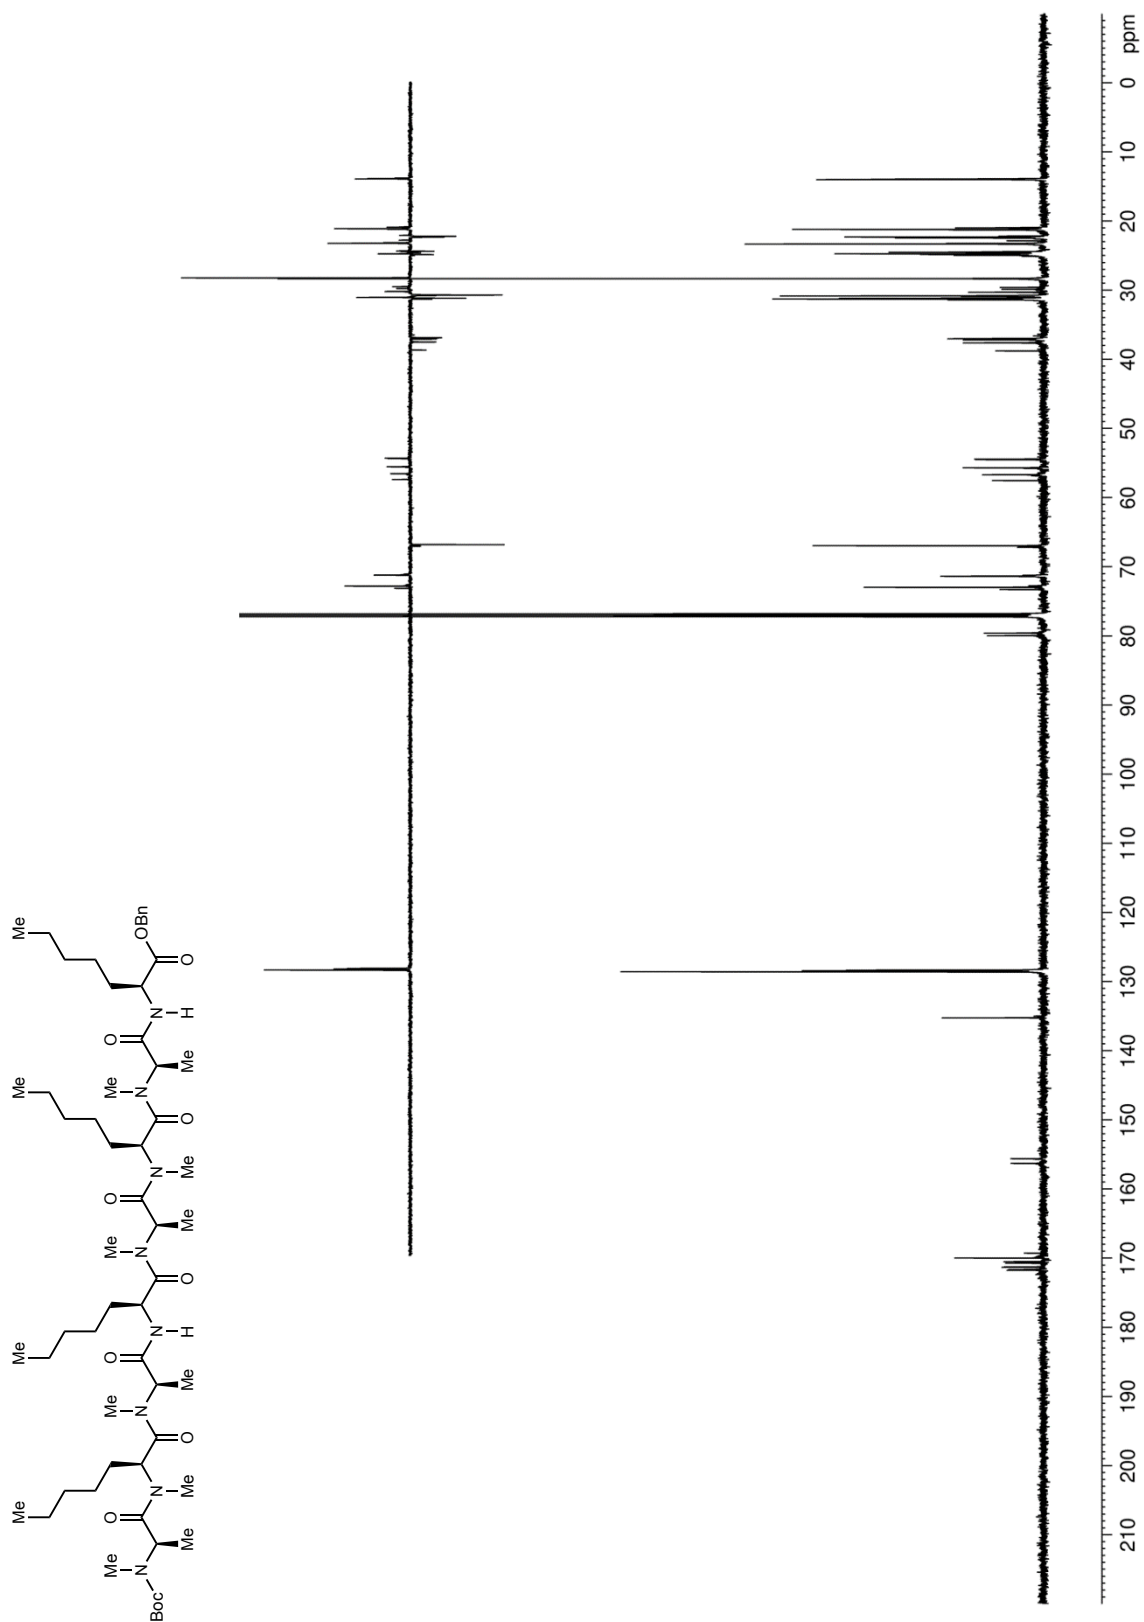

Figure S83.  $^1\text{H}$  NMR (600 MHz,  $\text{CDCl}_3$ ) of **O74**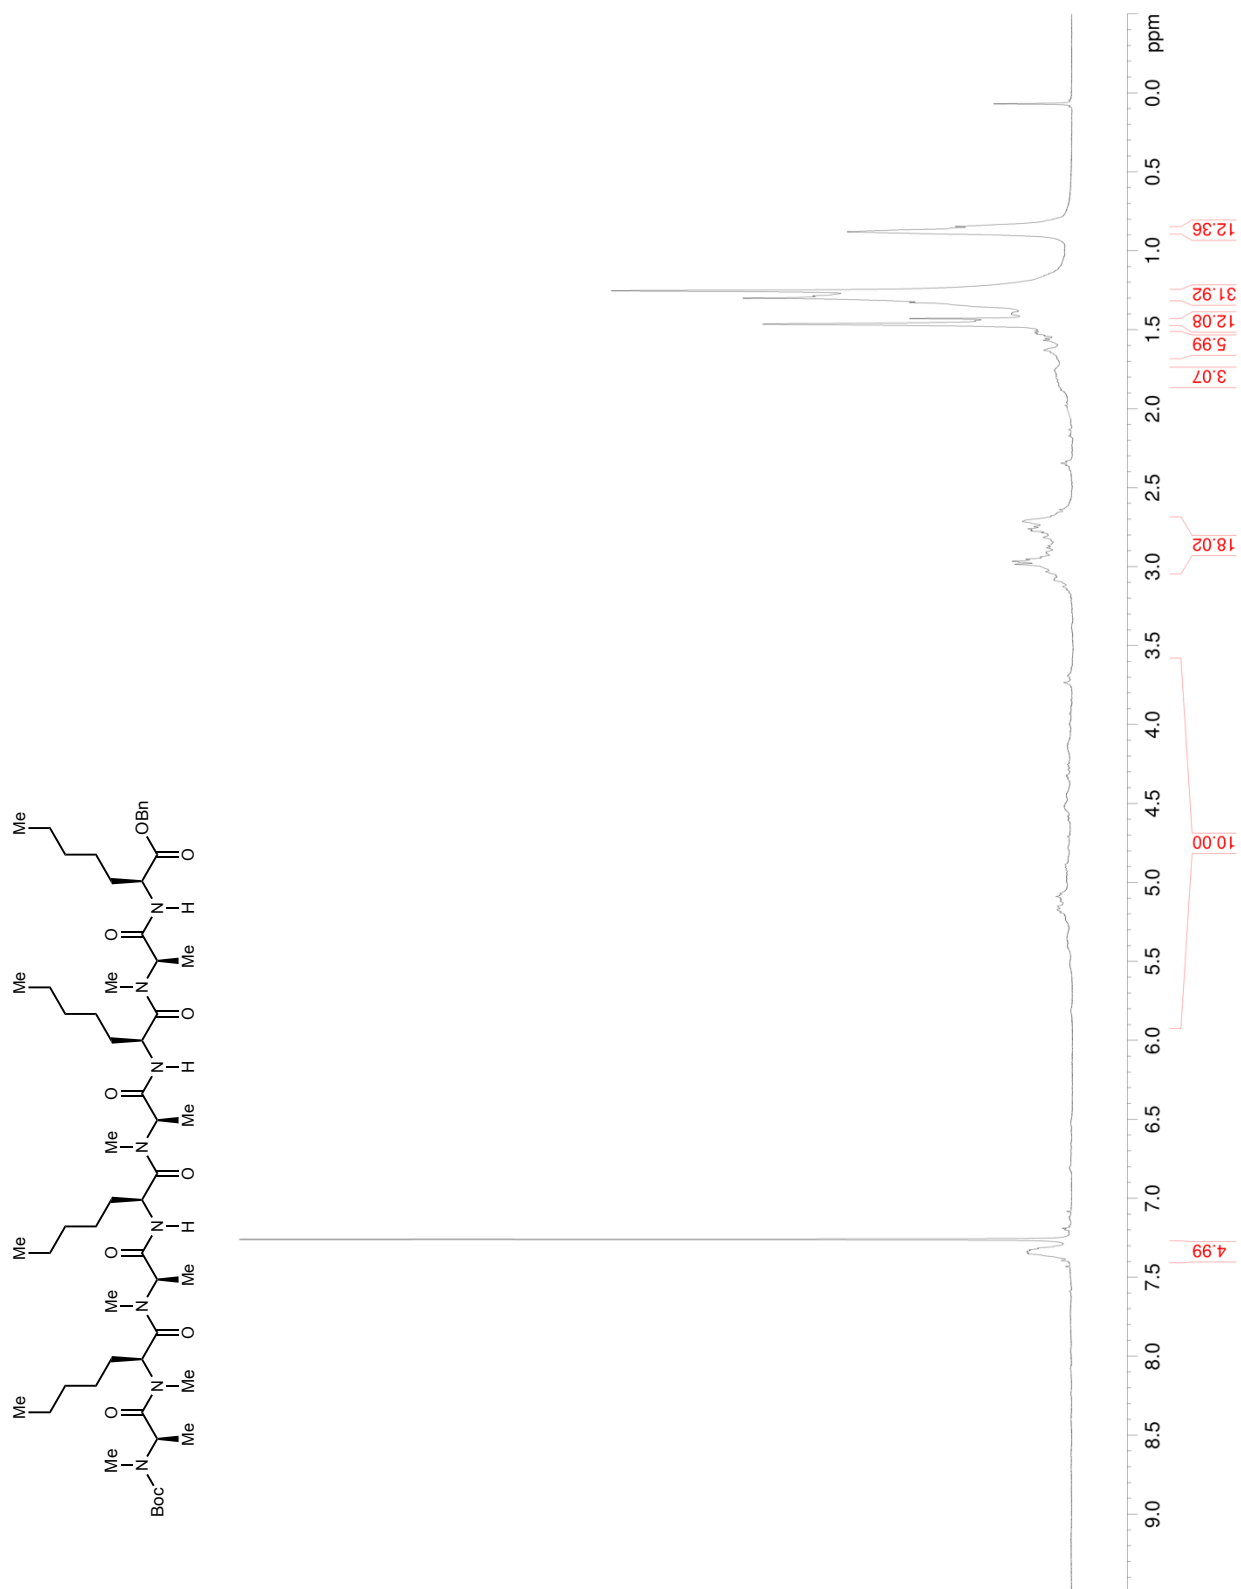

Figure S84.  $^{13}\text{C}$  NMR (150 MHz,  $\text{CDCl}_3$ ) of **O74**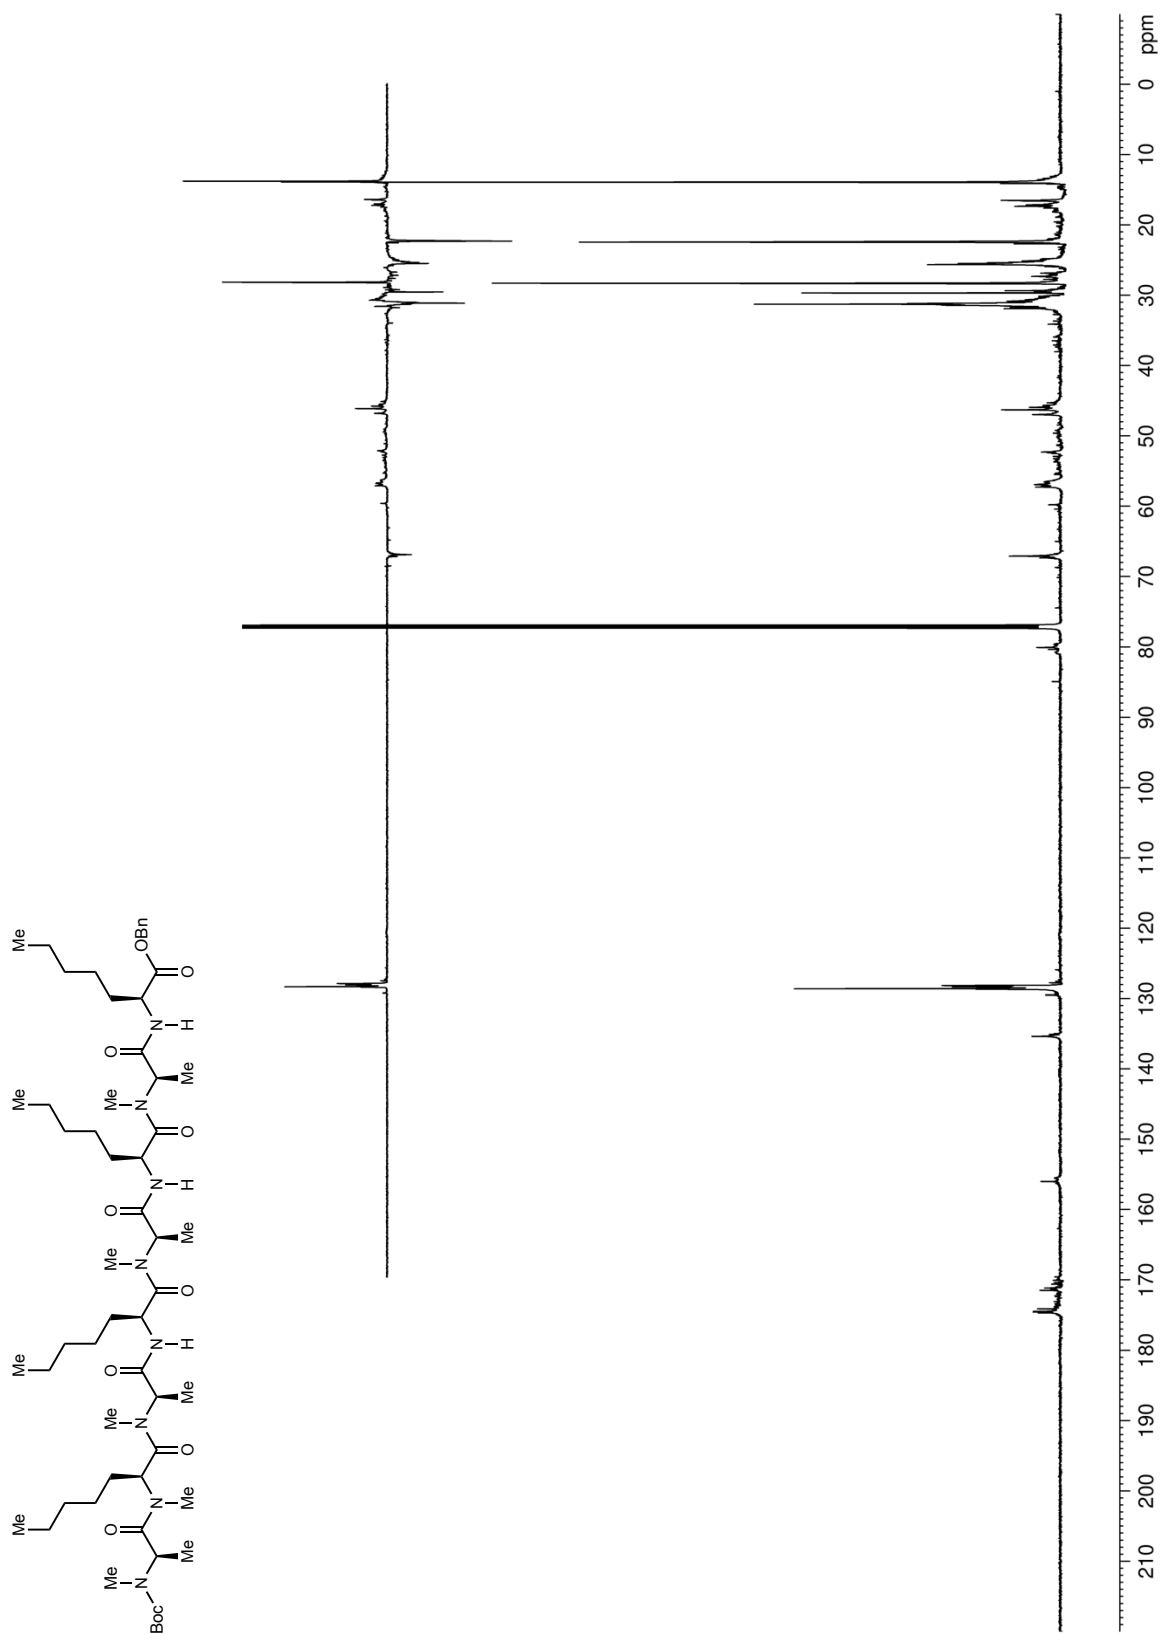

Figure S85.  $^1\text{H}$  NMR (600 MHz,  $\text{CDCl}_3$ ) of **1.1**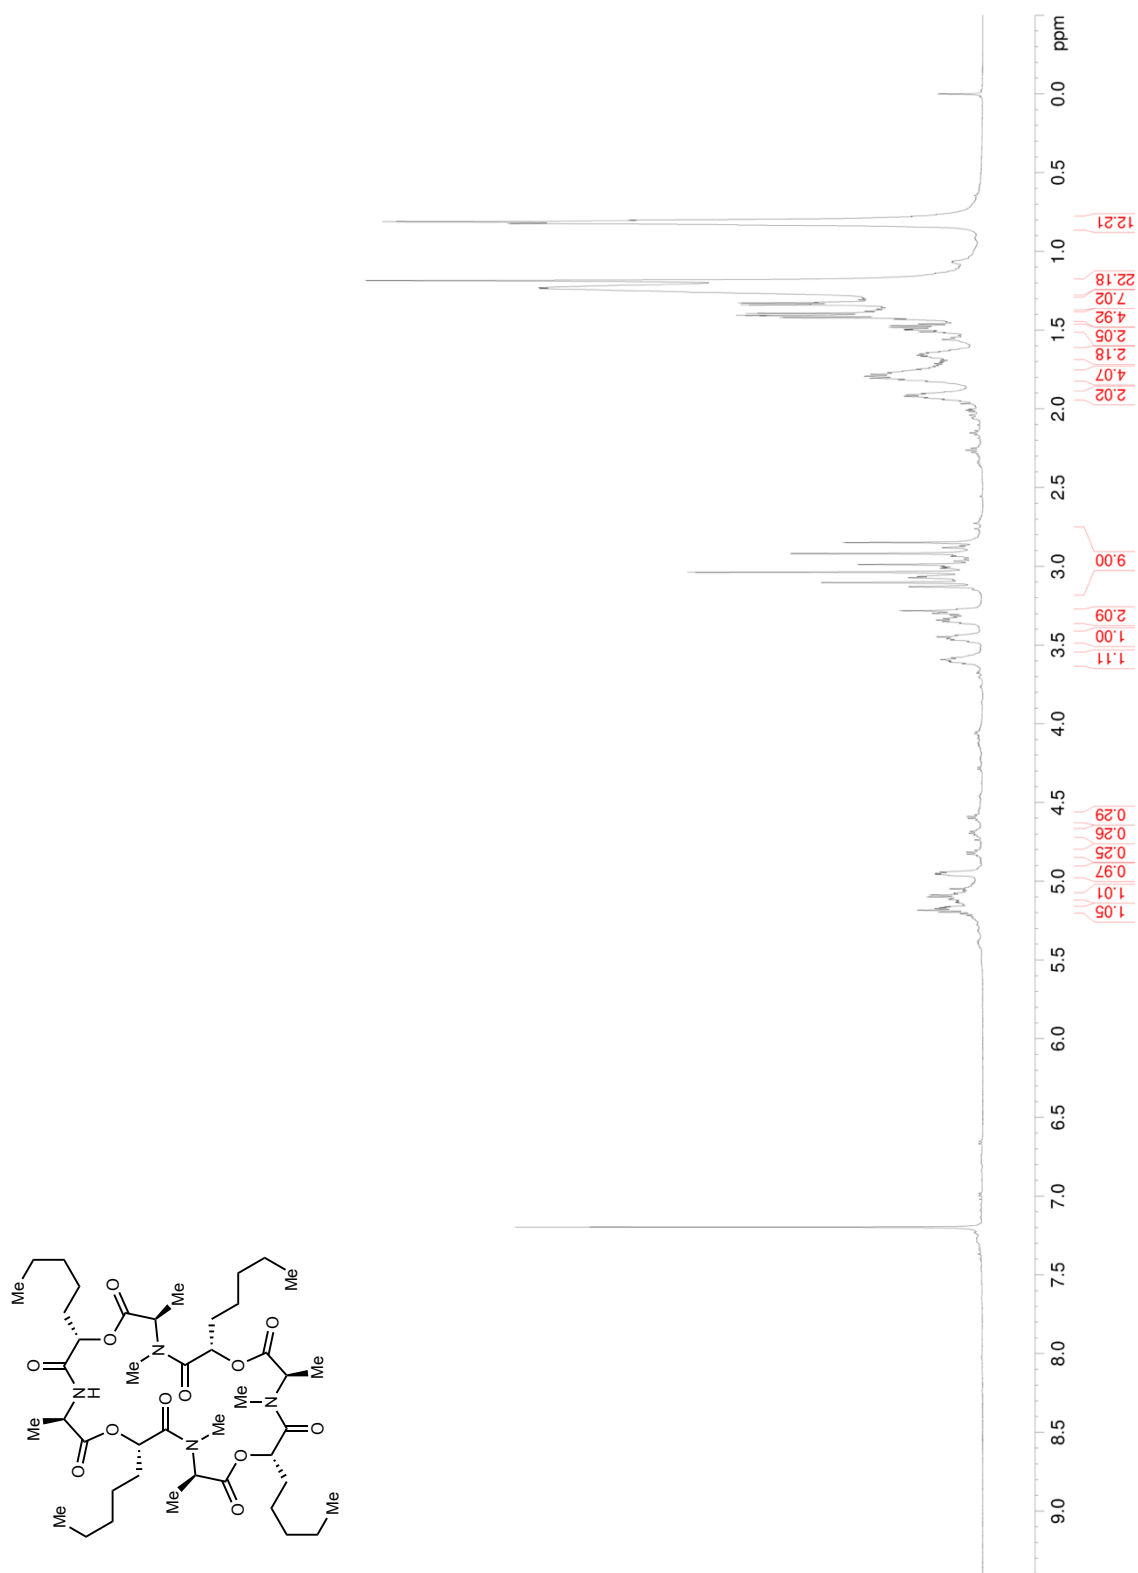

Figure S86.  $^{13}\text{C}$  NMR (150 MHz,  $\text{CDCl}_3$ ) of **1.1**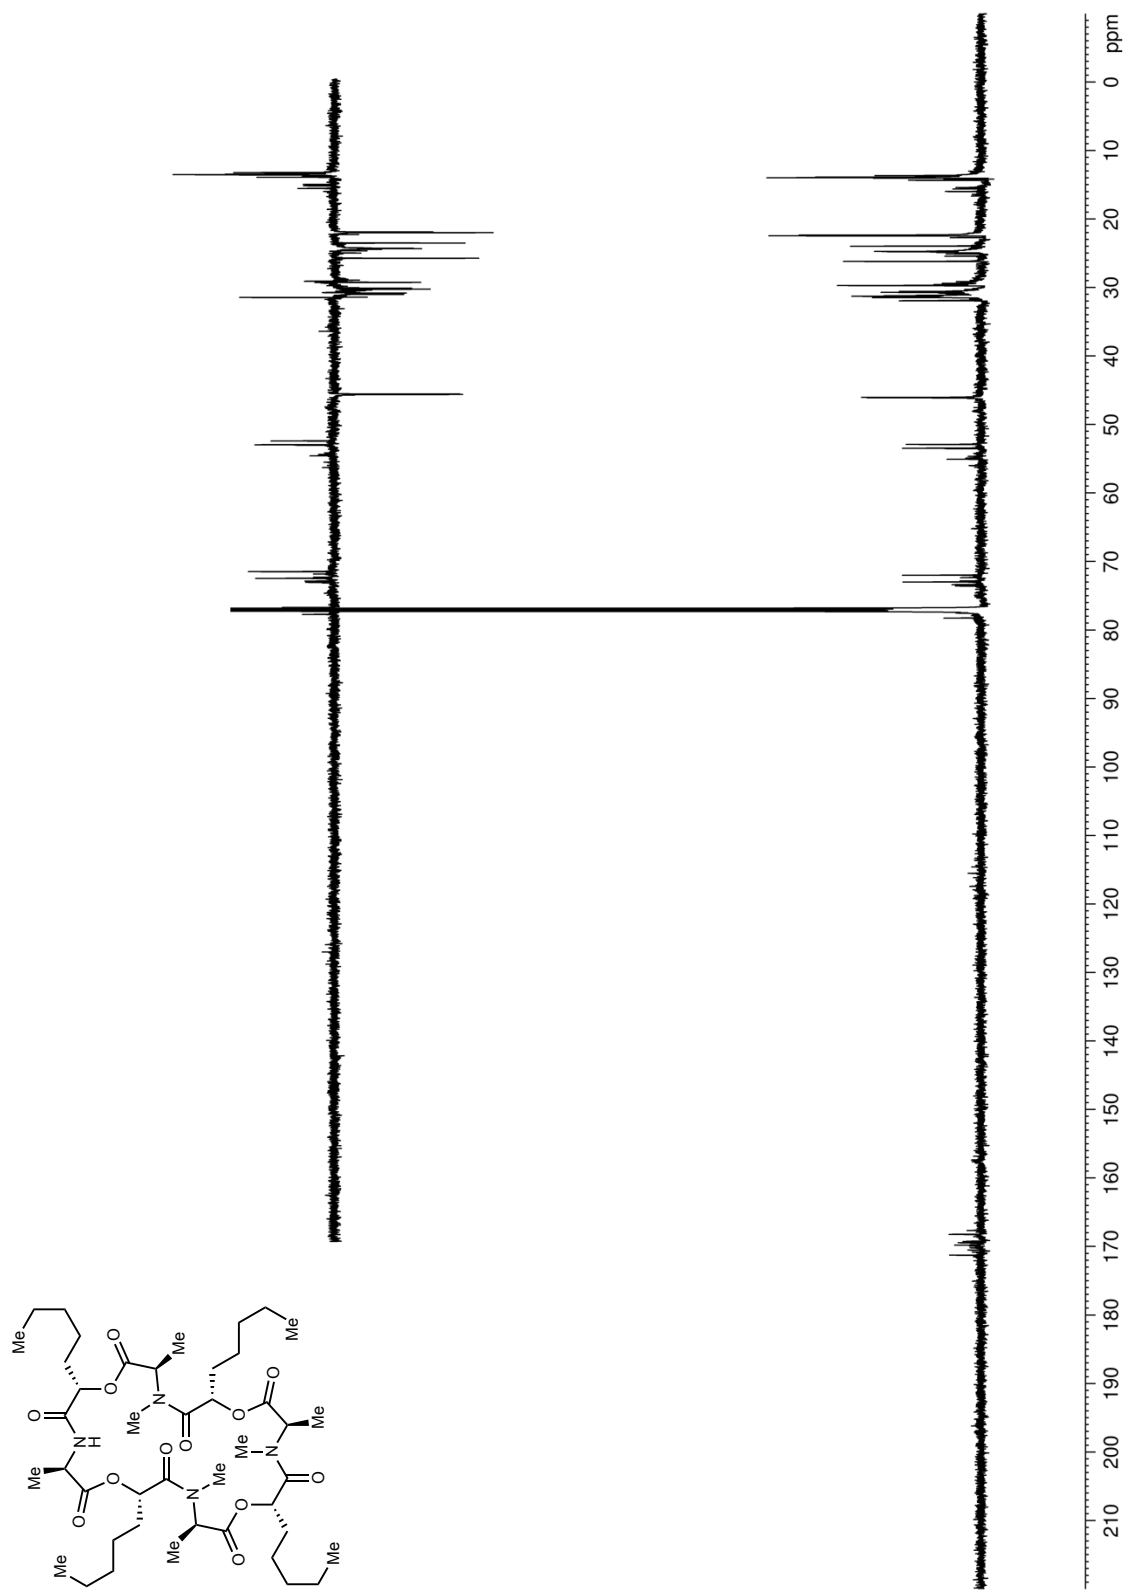

Figure S87.  $^1\text{H}$  NMR (600 MHz,  $\text{CDCl}_3$ ) of **1.2**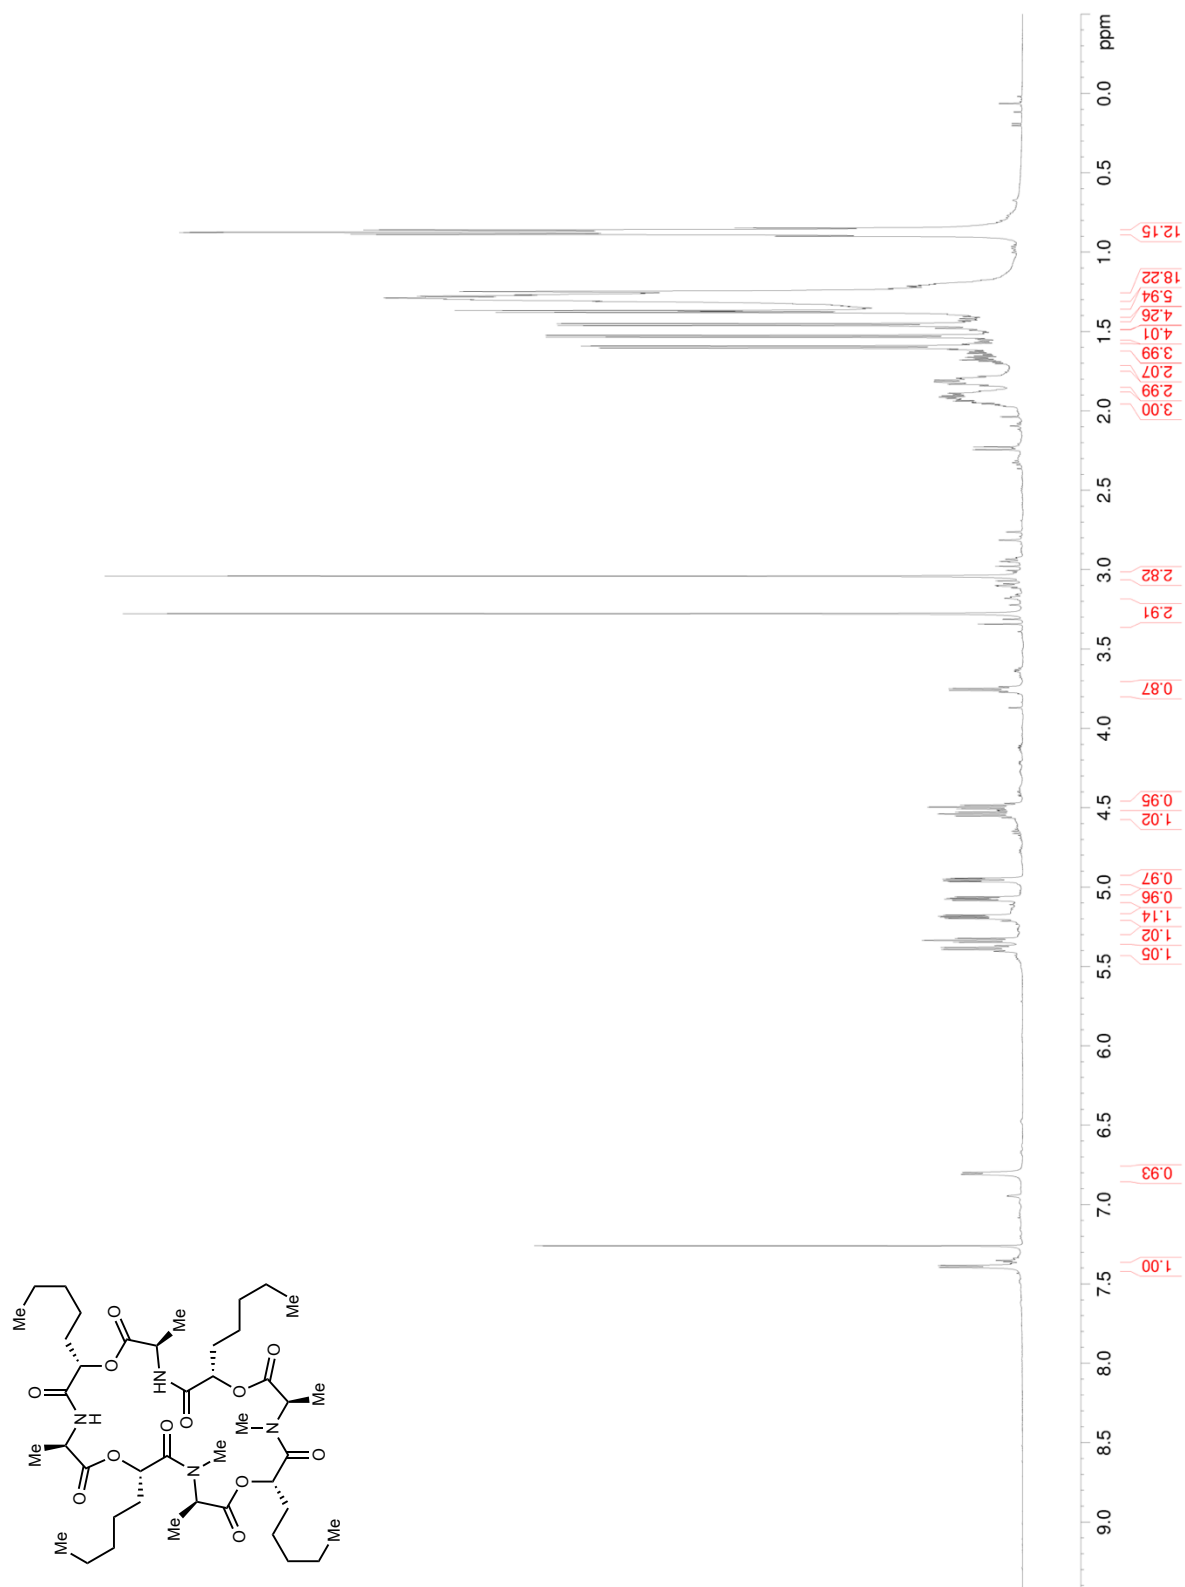





Figure S89.  $^1\text{H}$  NMR (600 MHz,  $\text{CDCl}_3$ ) of **1.3**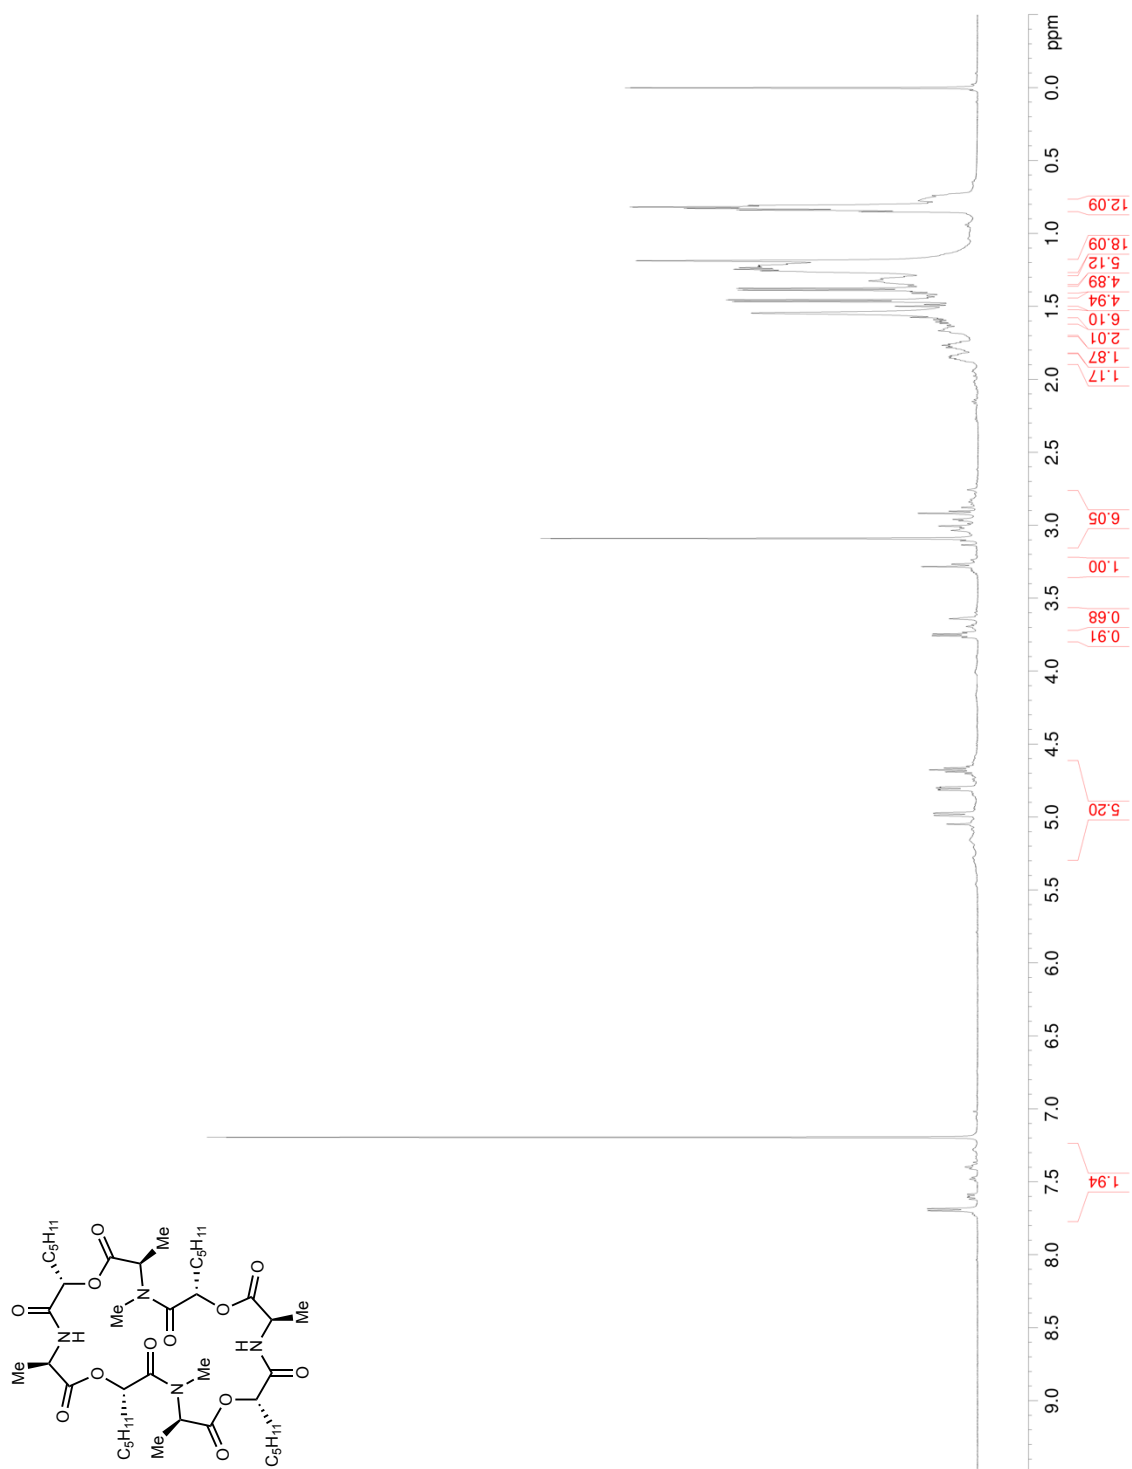

Figure S90.  $^{13}\text{C}$  NMR (150 MHz,  $\text{CDCl}_3$ ) of **1.3**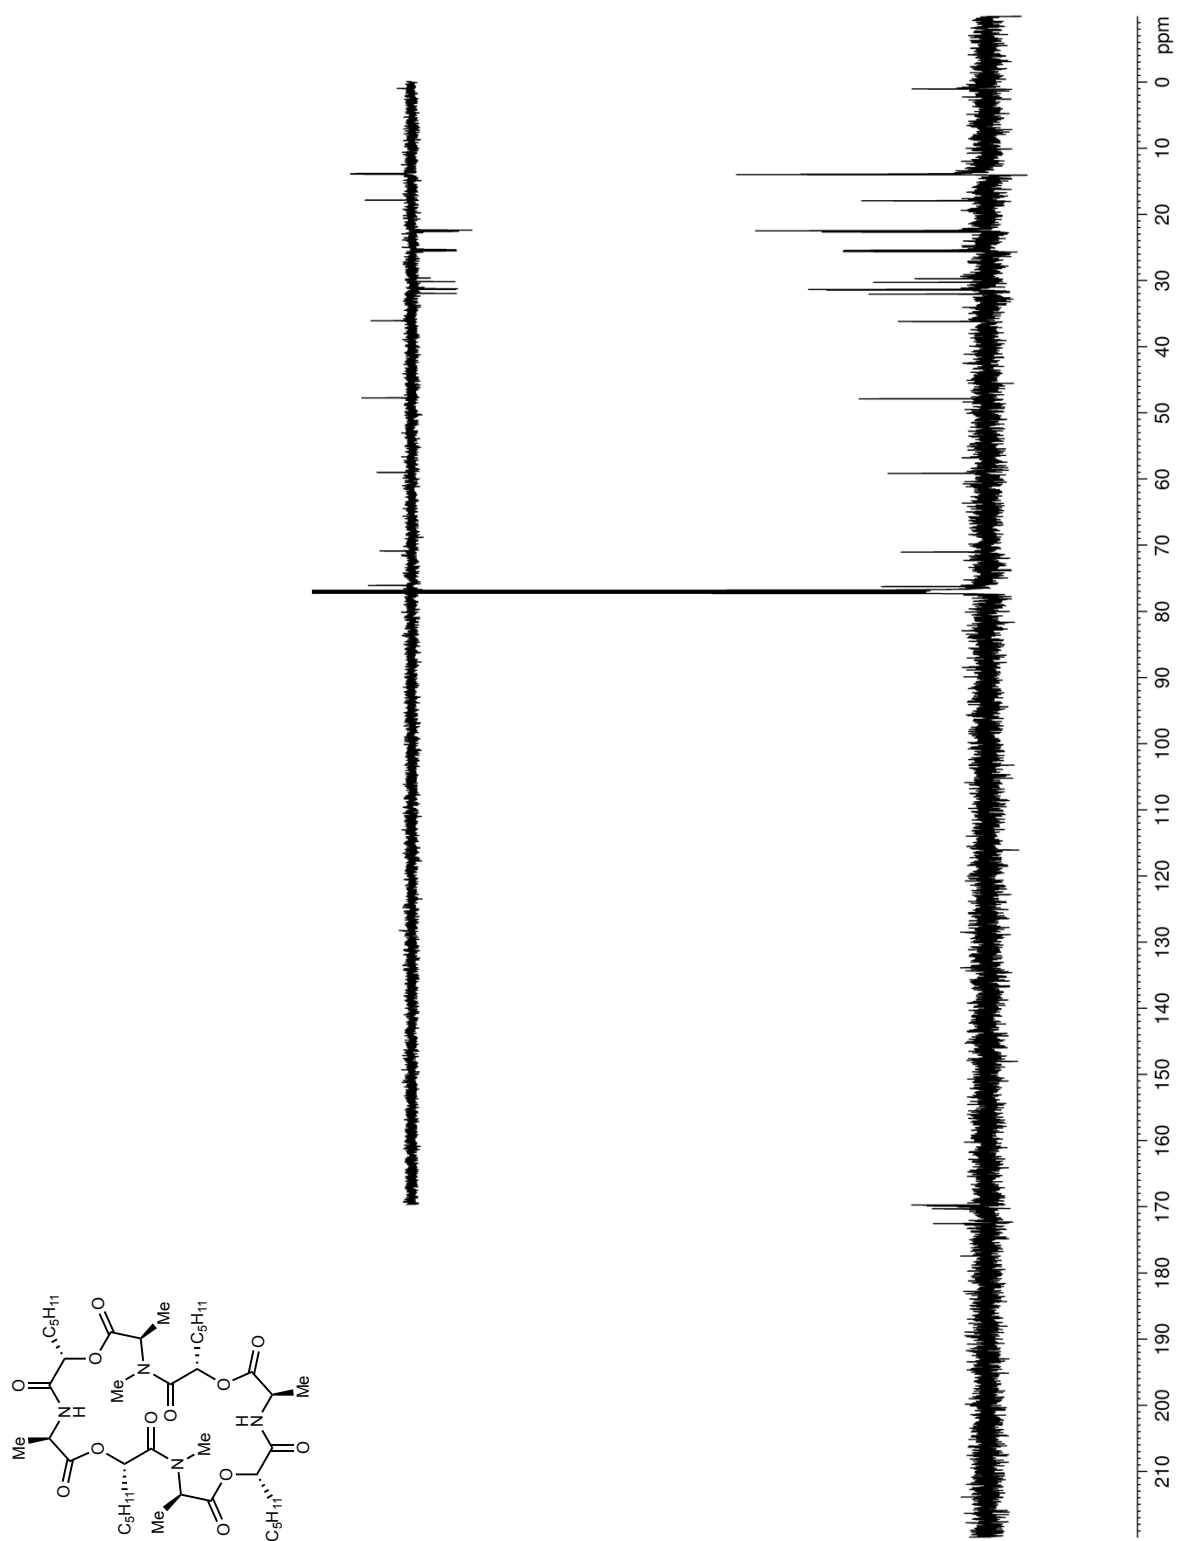



Figure S92.  $^{13}\text{C}$  NMR (150 MHz,  $\text{CDCl}_3$ ) of **1.4**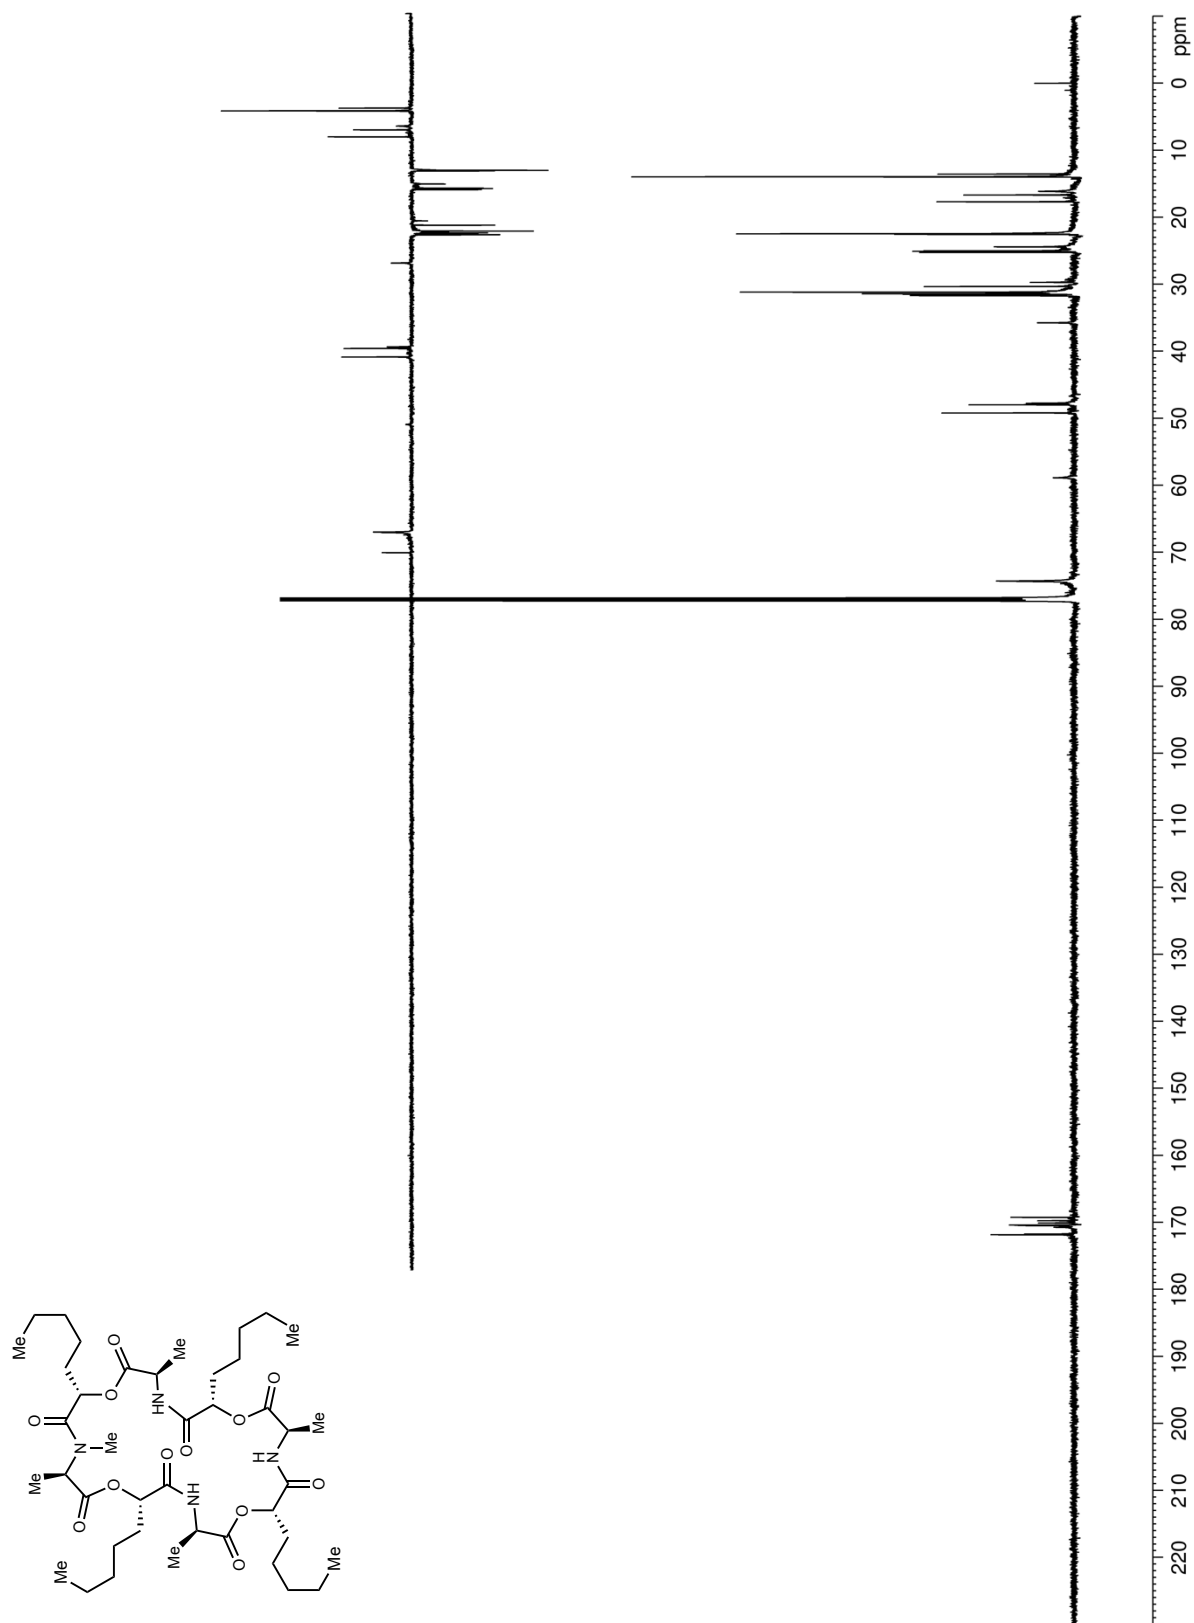

Figure S93.  $^1\text{H}$  NMR (600 MHz,  $\text{CD}_3\text{COCD}_3$ ) of **2.1**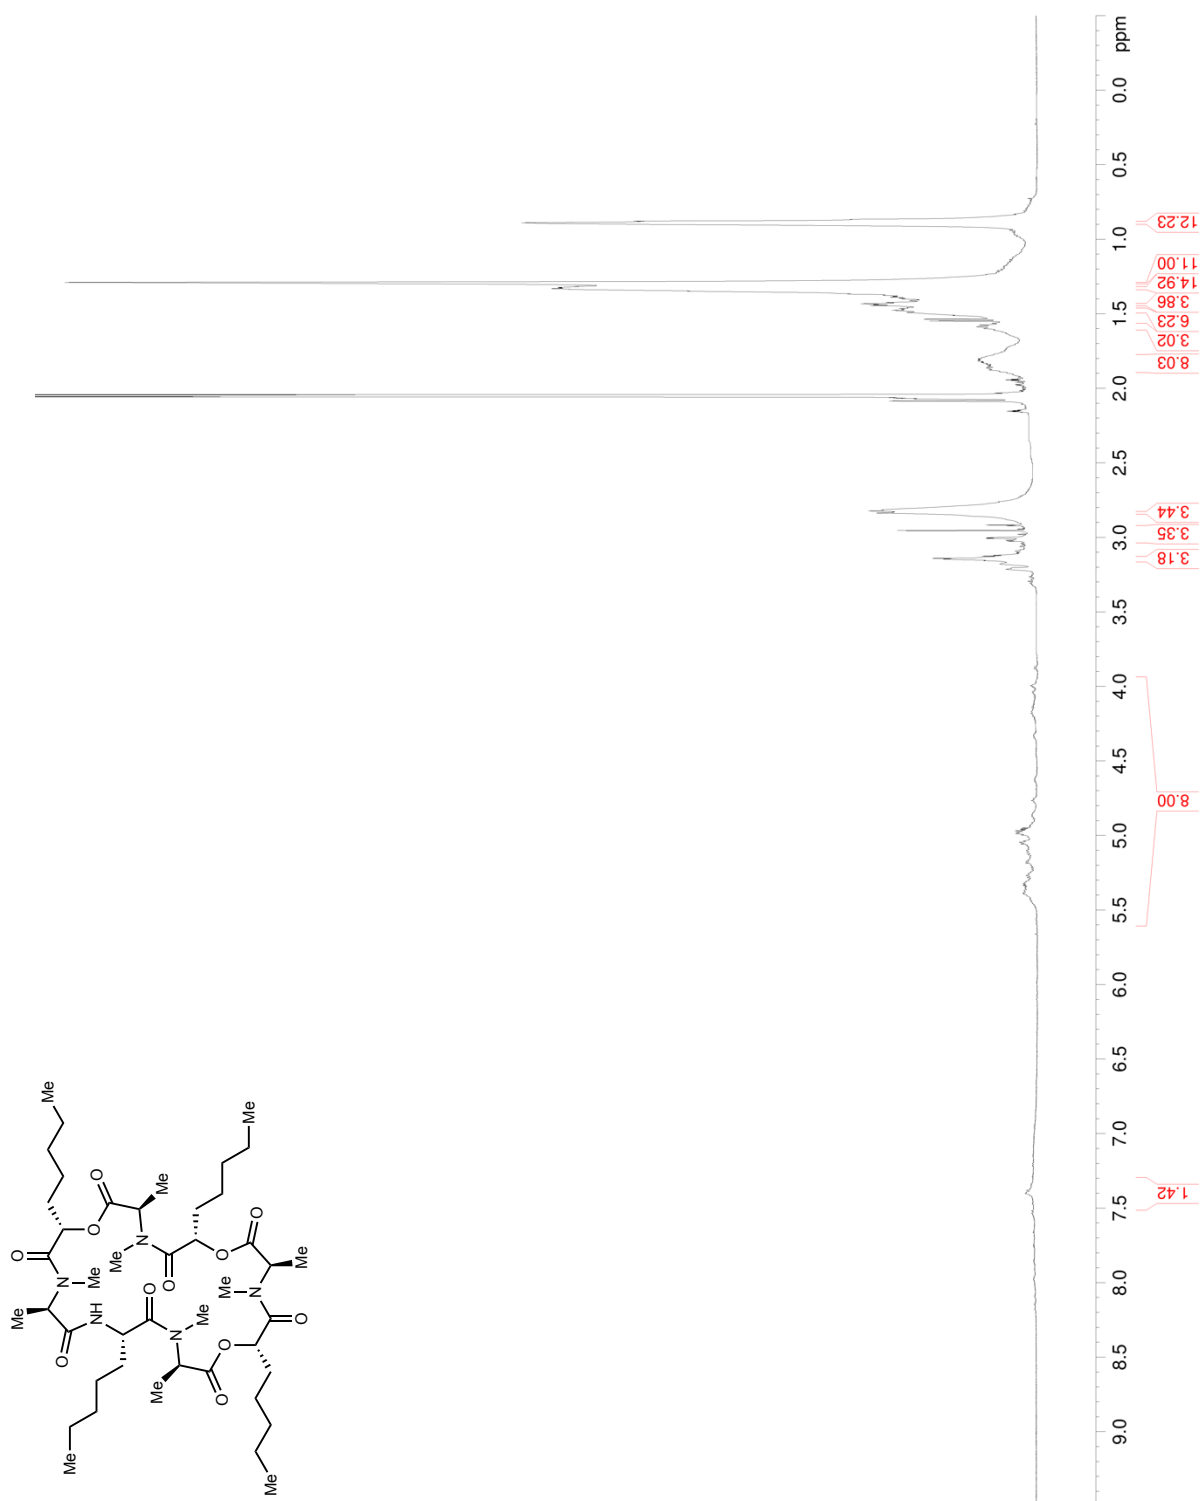



Figure S95.  $^1\text{H}$  NMR (600 MHz,  $\text{CDCl}_3$ ) of **2.2**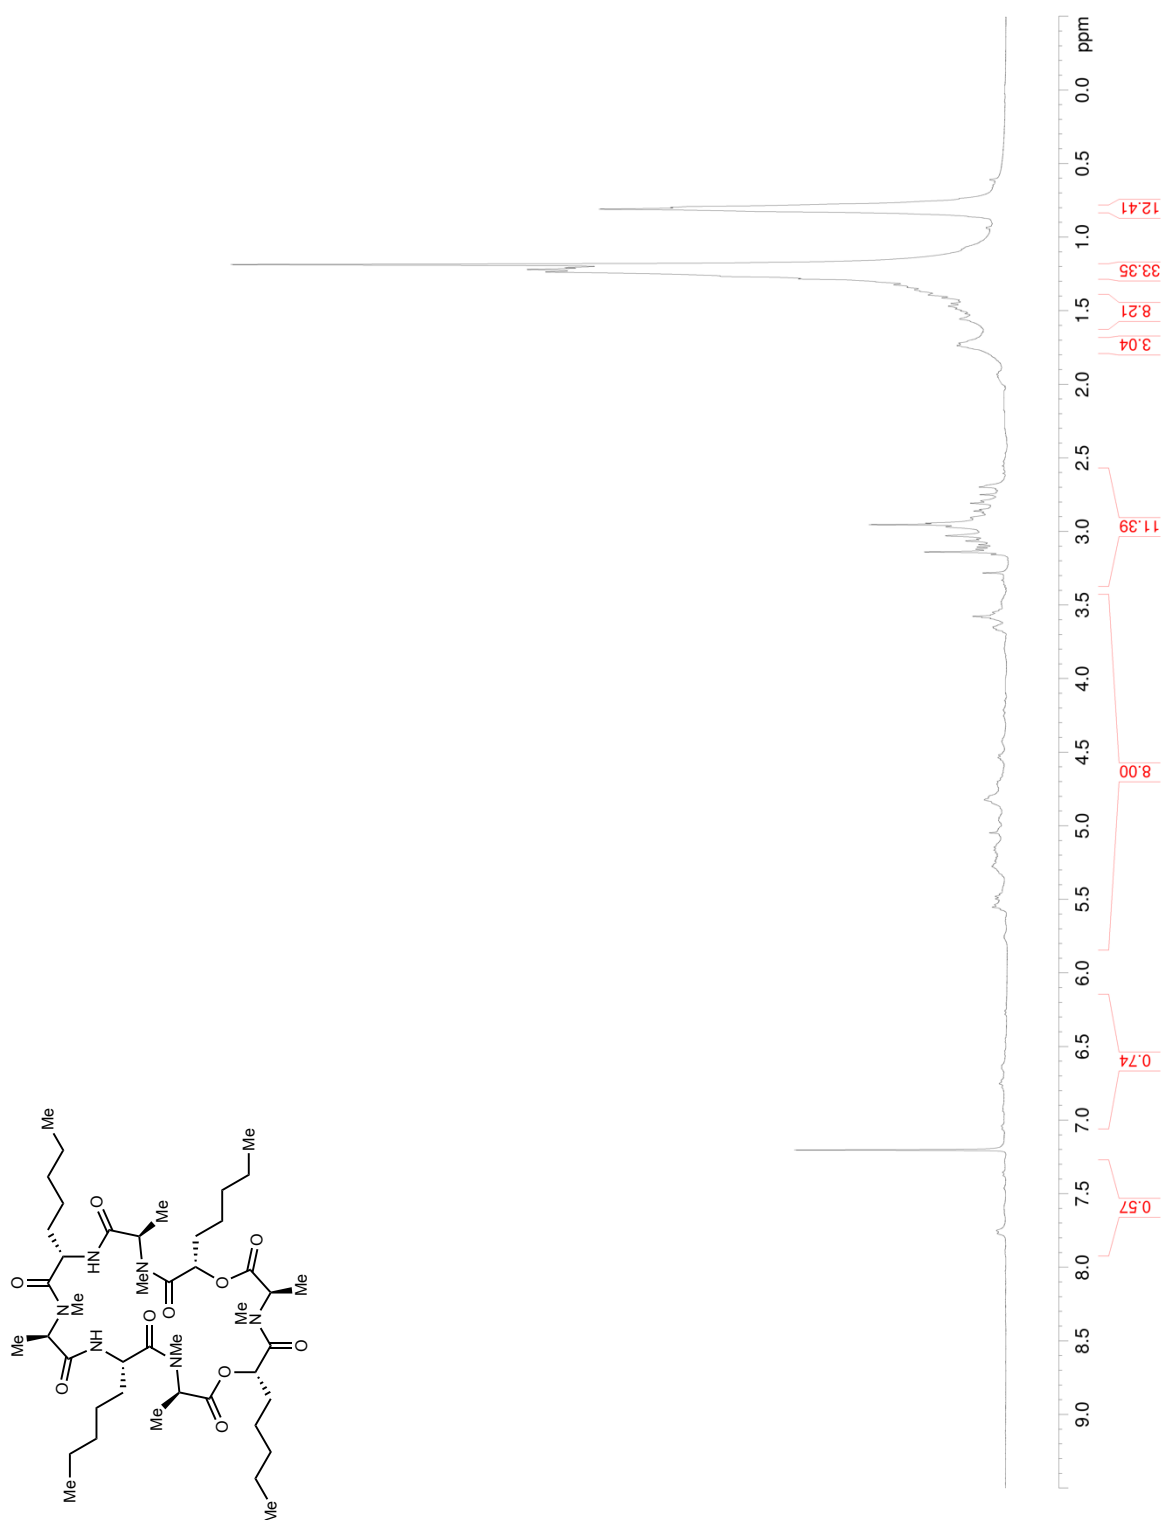

Figure S96.  $^{13}\text{C}$  NMR (150 MHz,  $\text{CDCl}_3$ ) of **2.2**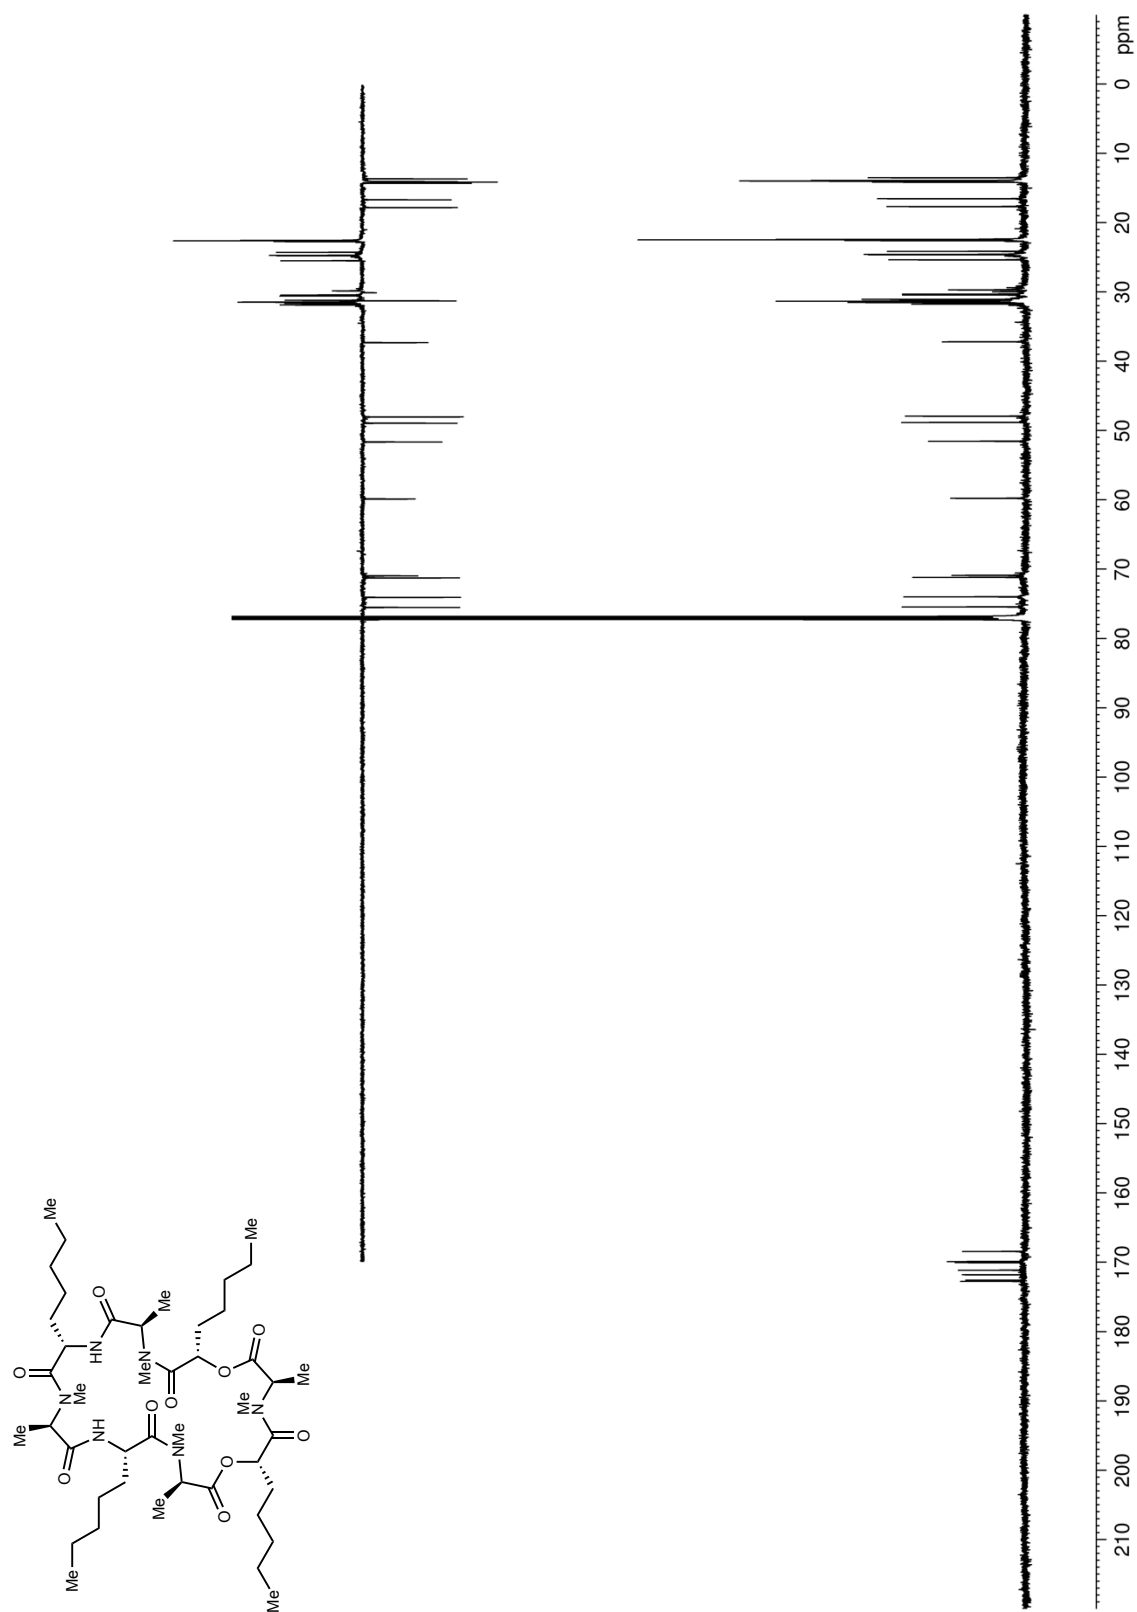



Figure S97.  $^1\text{H}$  NMR (600 MHz,  $\text{CDCl}_3$ ) of **2.3**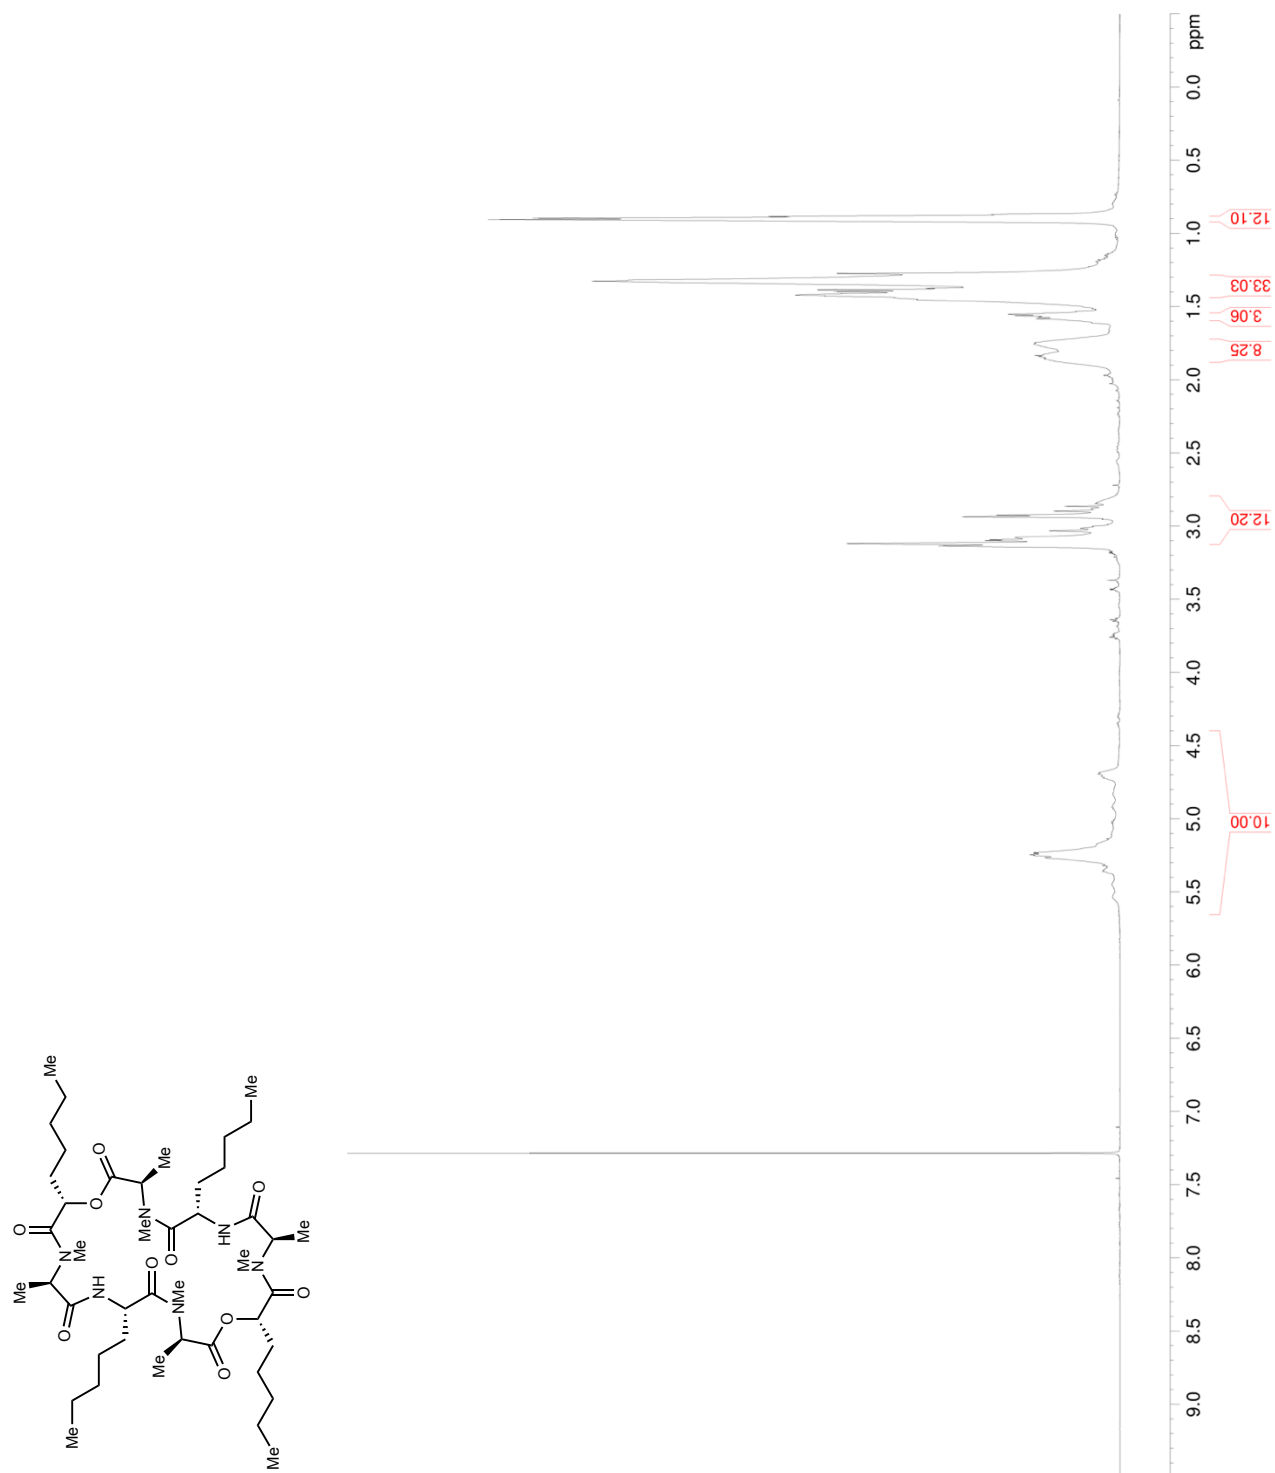

Figure S98.  $^{13}\text{C}$  NMR (150 MHz,  $\text{CDCl}_3$ ) of **2.3**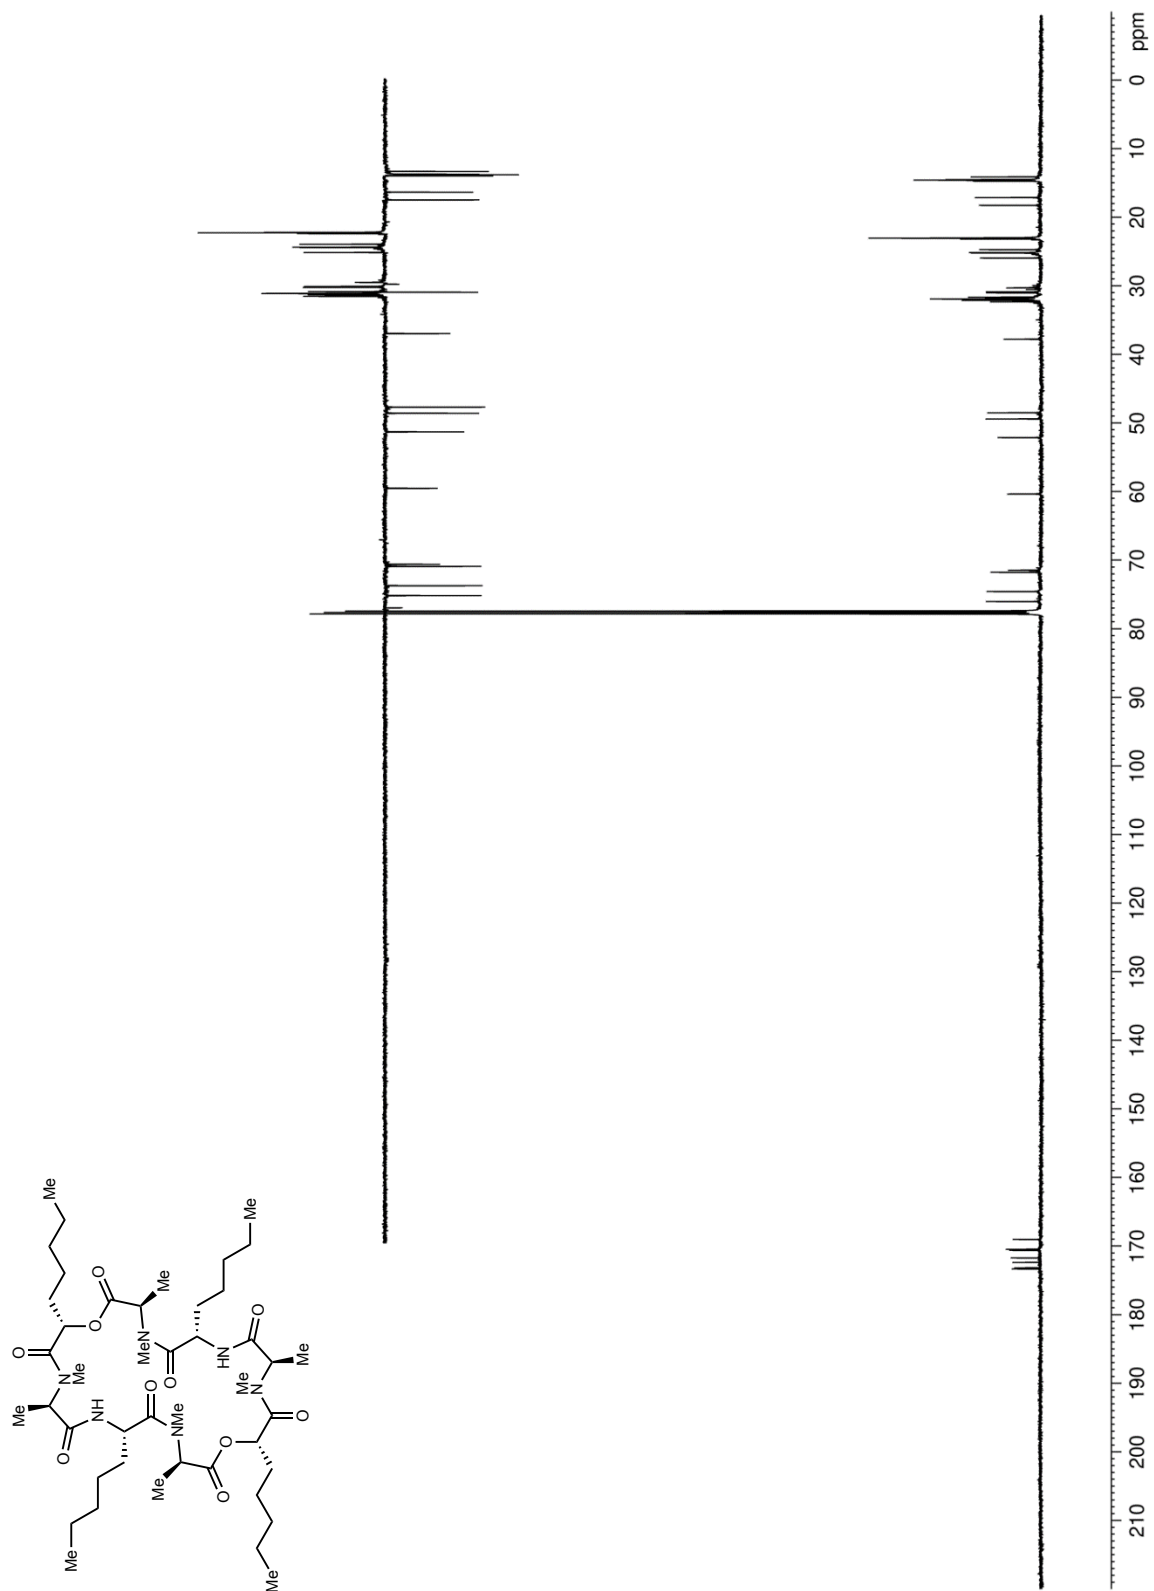

Figure S99.  $^1\text{H}$  NMR (600 MHz,  $\text{CDCl}_3$ ) of **2.4**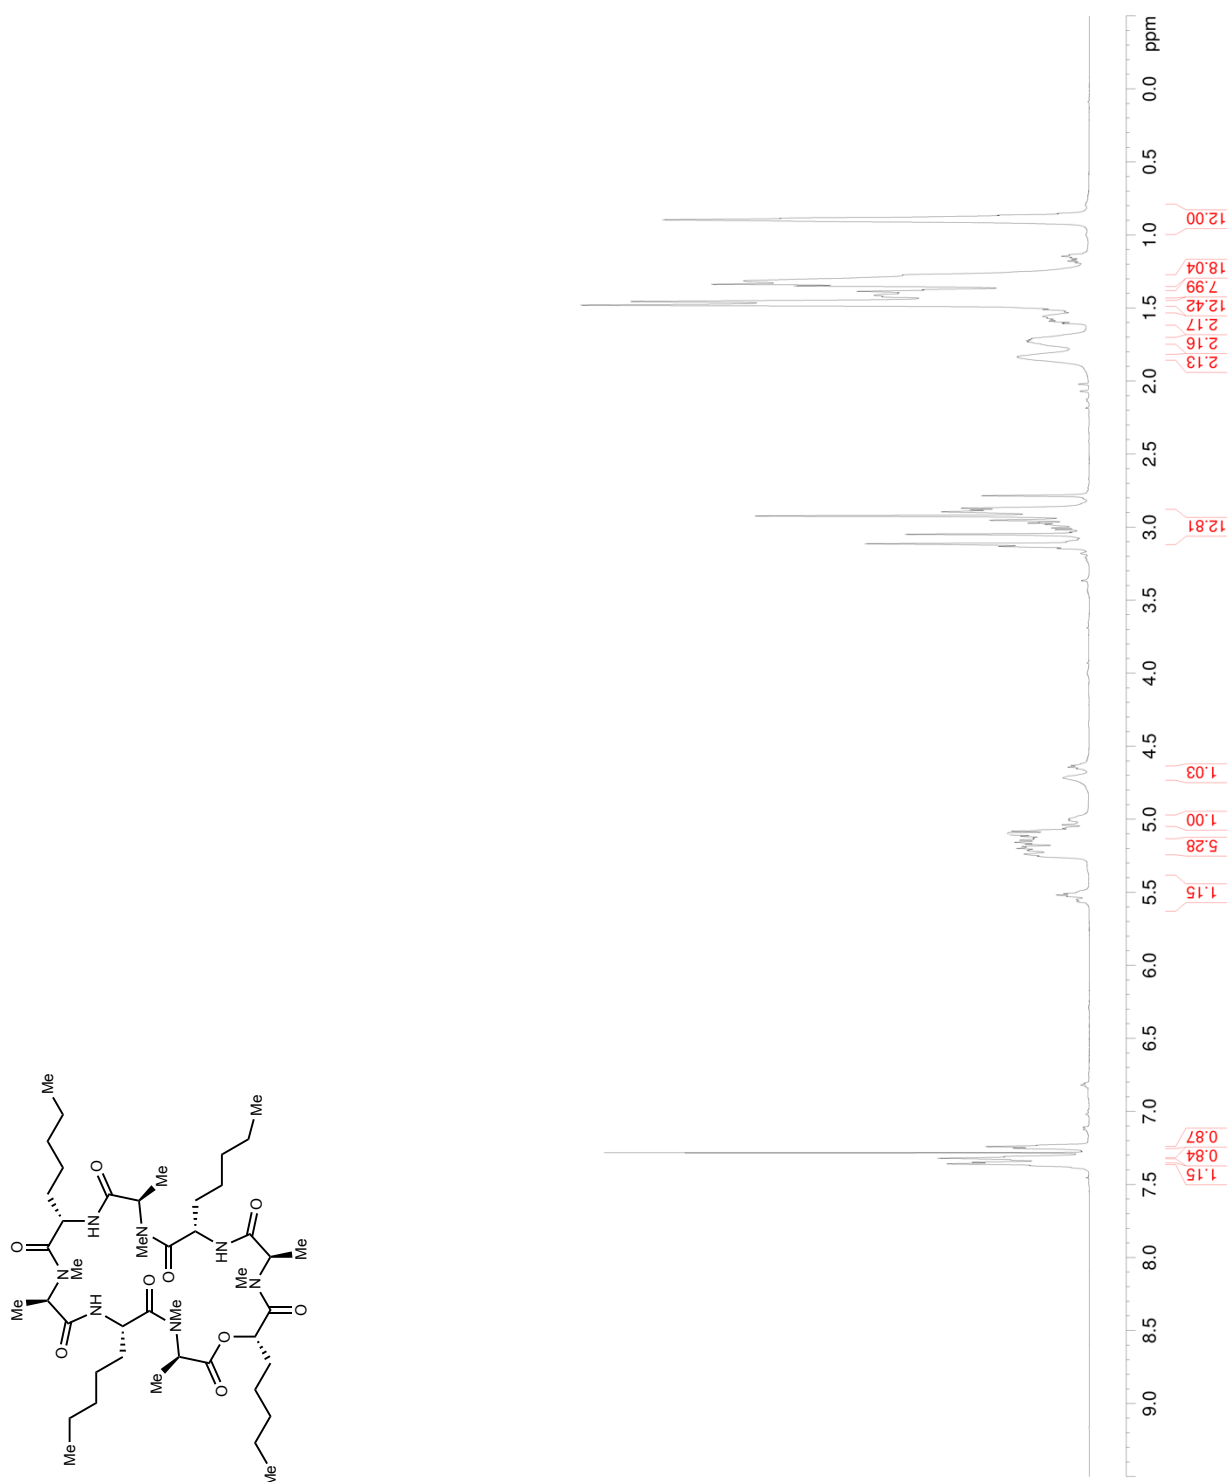



Figure S101.  $^1\text{H}$  NMR (600 MHz,  $\text{CDCl}_3$ ) of **2.5**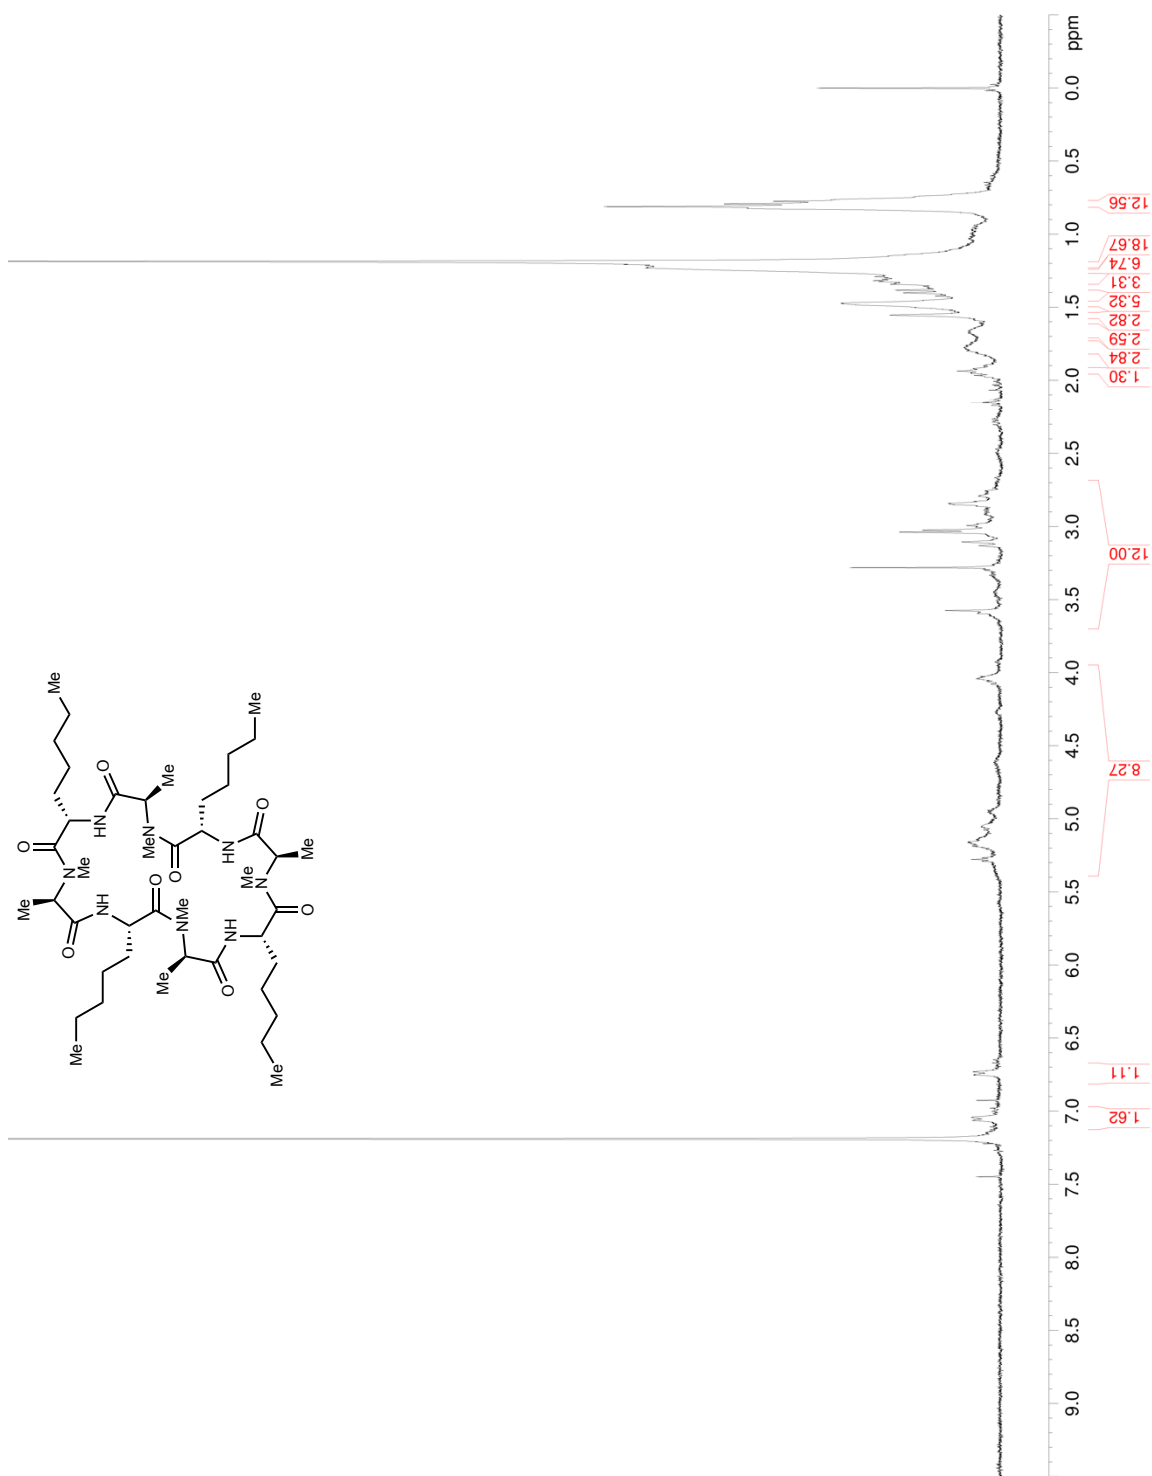

Figure S102.  $^{13}\text{C}$  NMR (150 MHz,  $\text{CDCl}_3$ ) of 2.5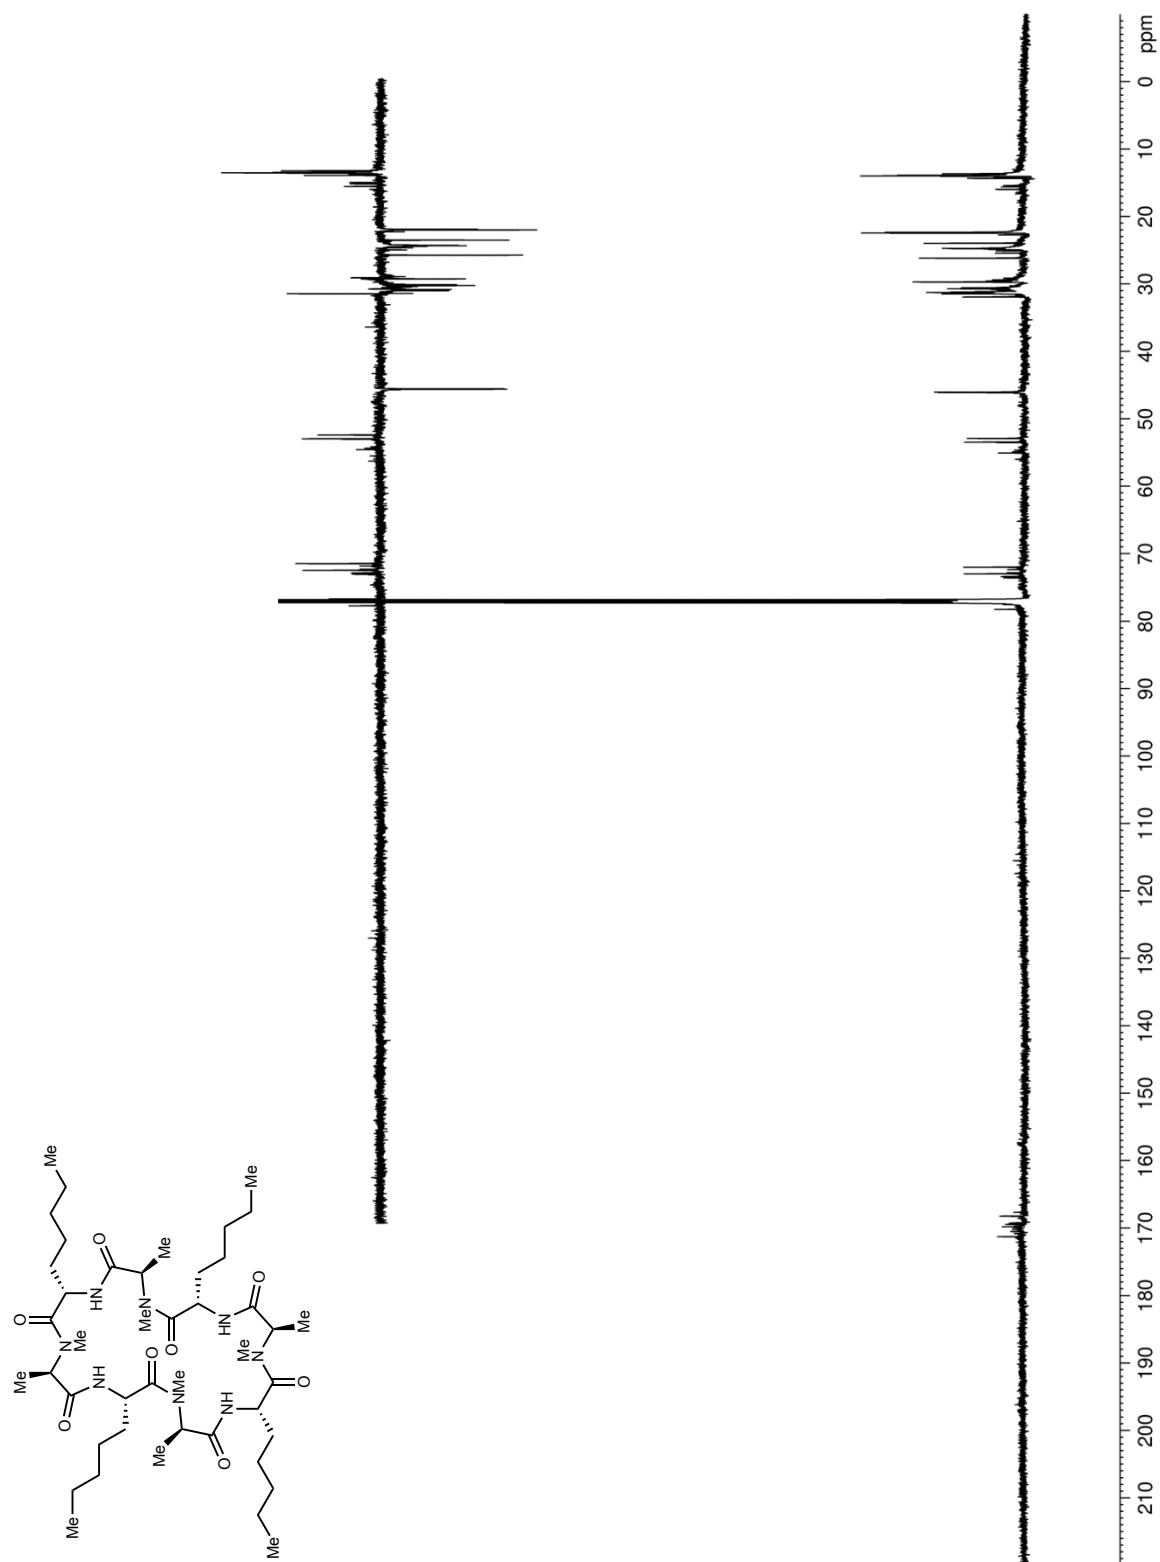

Figure S103.  $^1\text{H}$  NMR (600 MHz,  $\text{CDCl}_3$ ) of **3.1**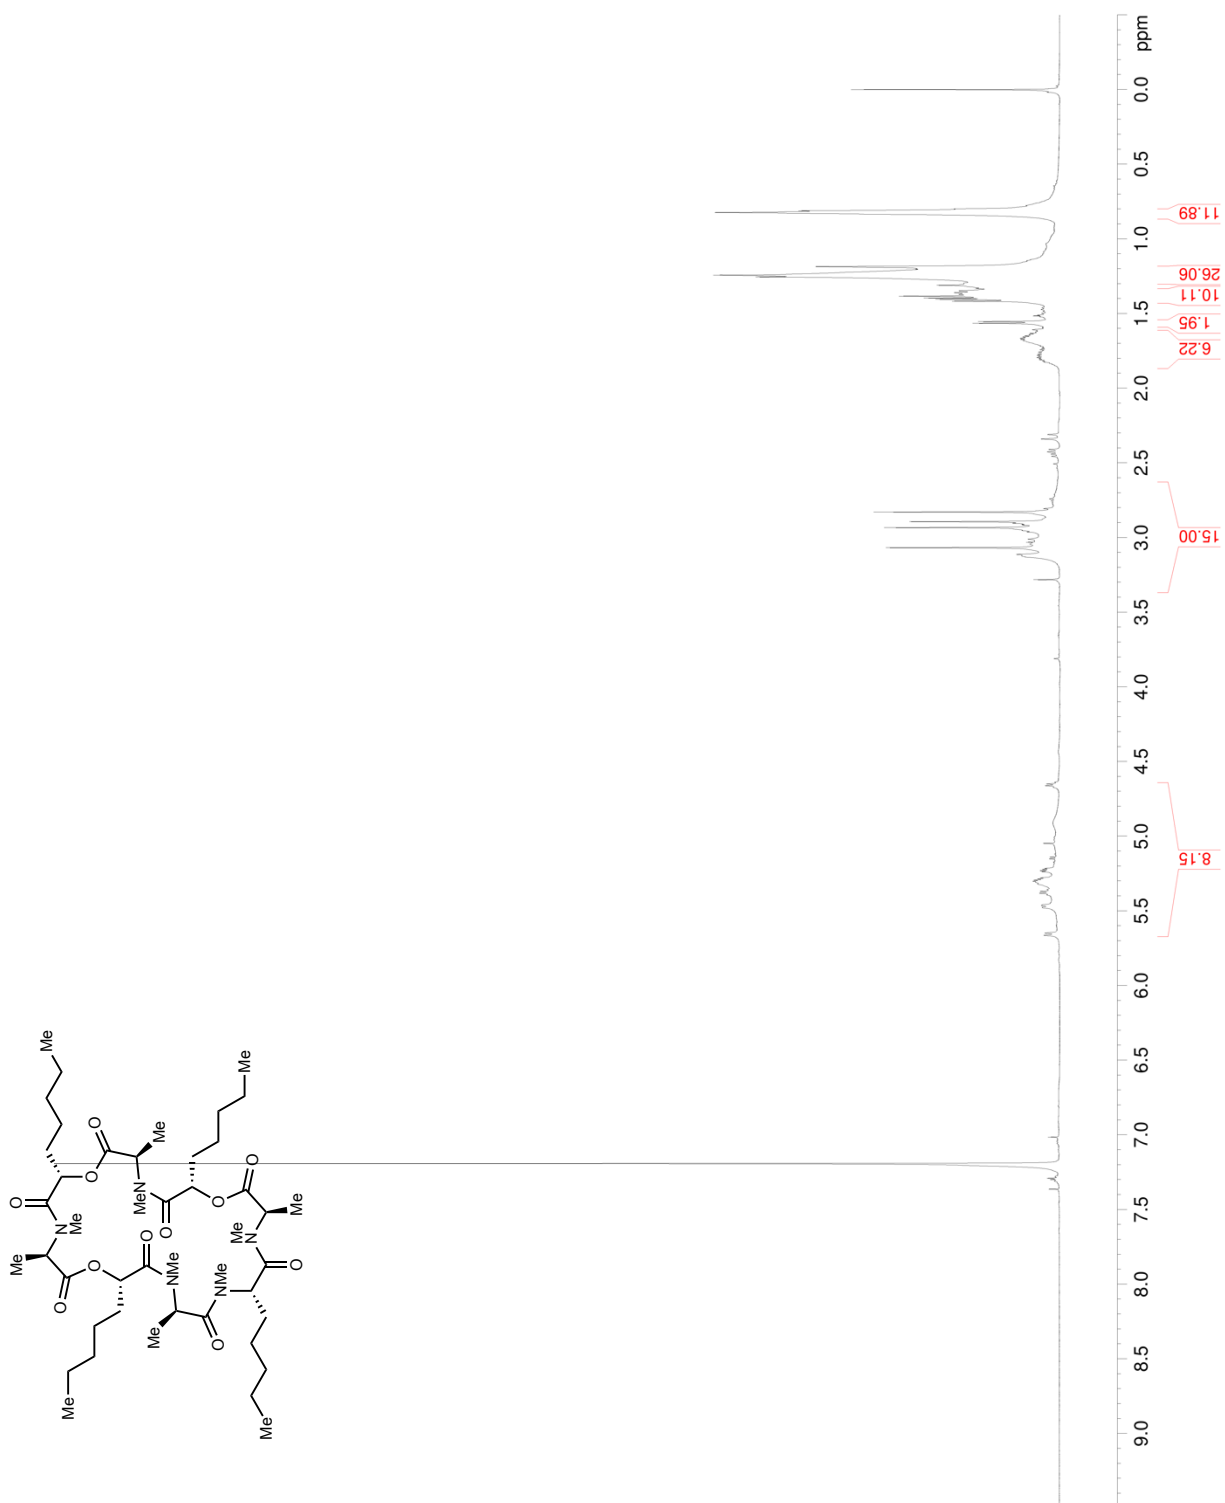

Figure S104.  $^{13}\text{C}$  NMR (150 MHz,  $\text{CDCl}_3$ ) of **3.1**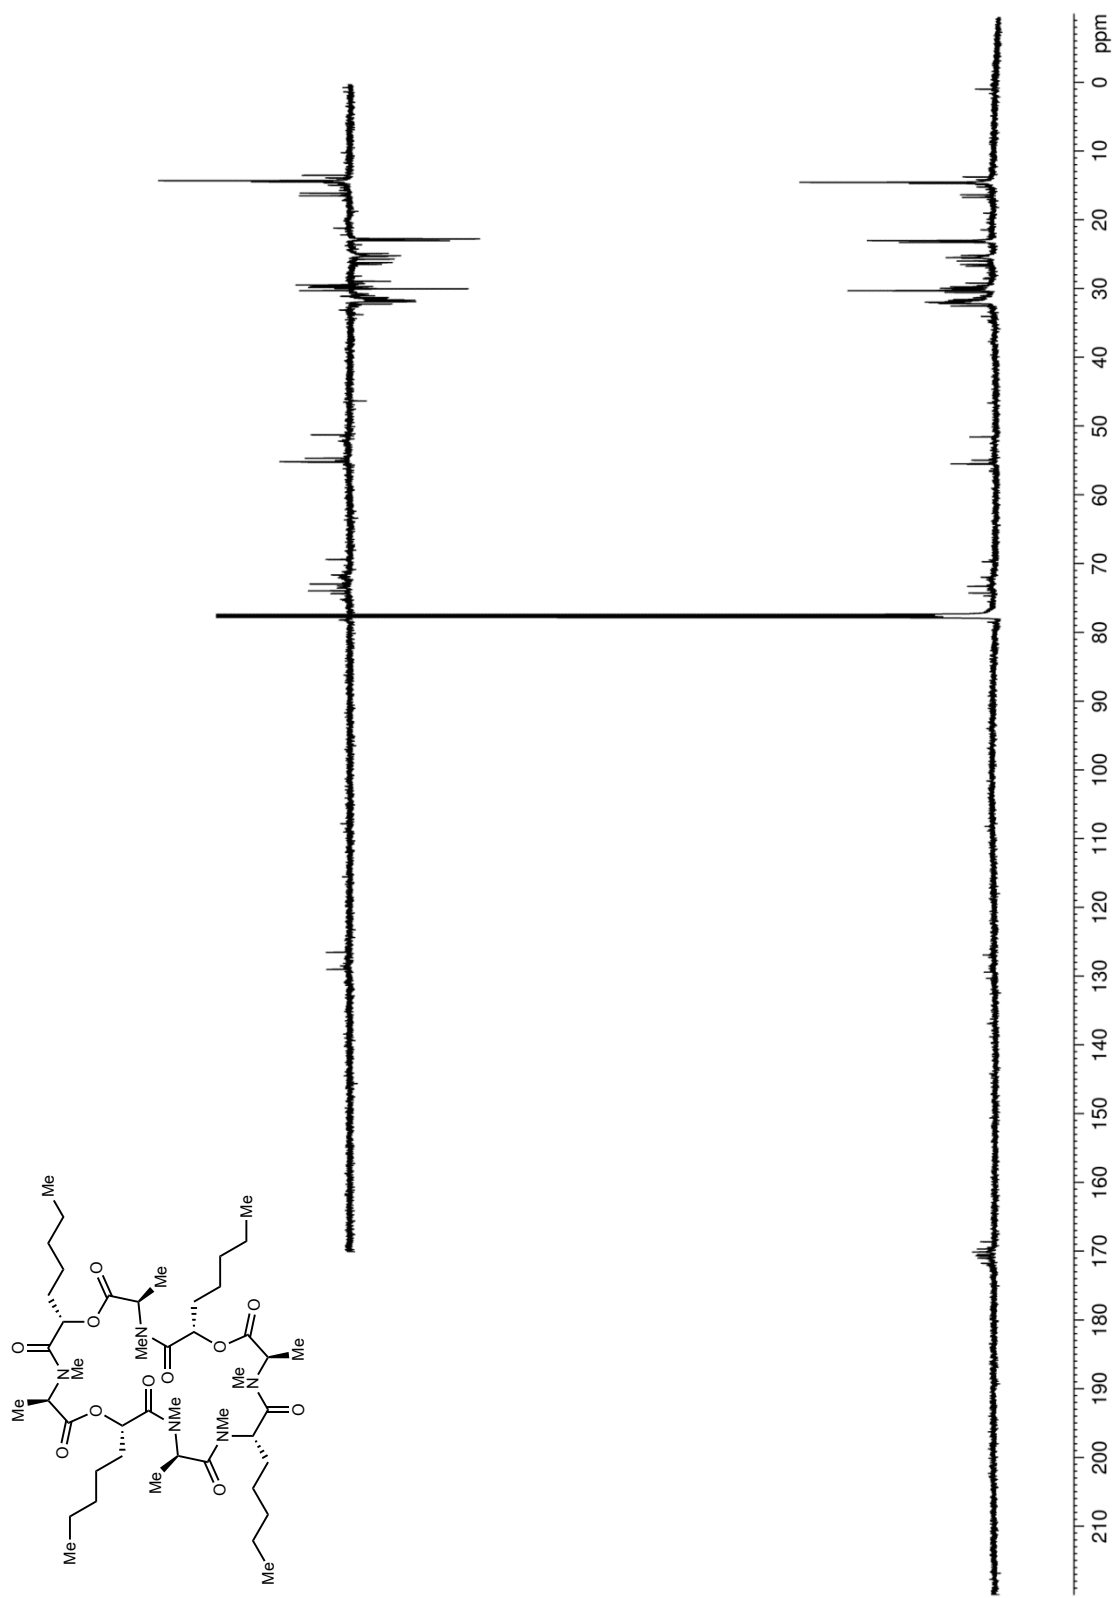



Figure S105.  $^1\text{H}$  NMR (600 MHz,  $\text{CDCl}_3$ ) of **3.2**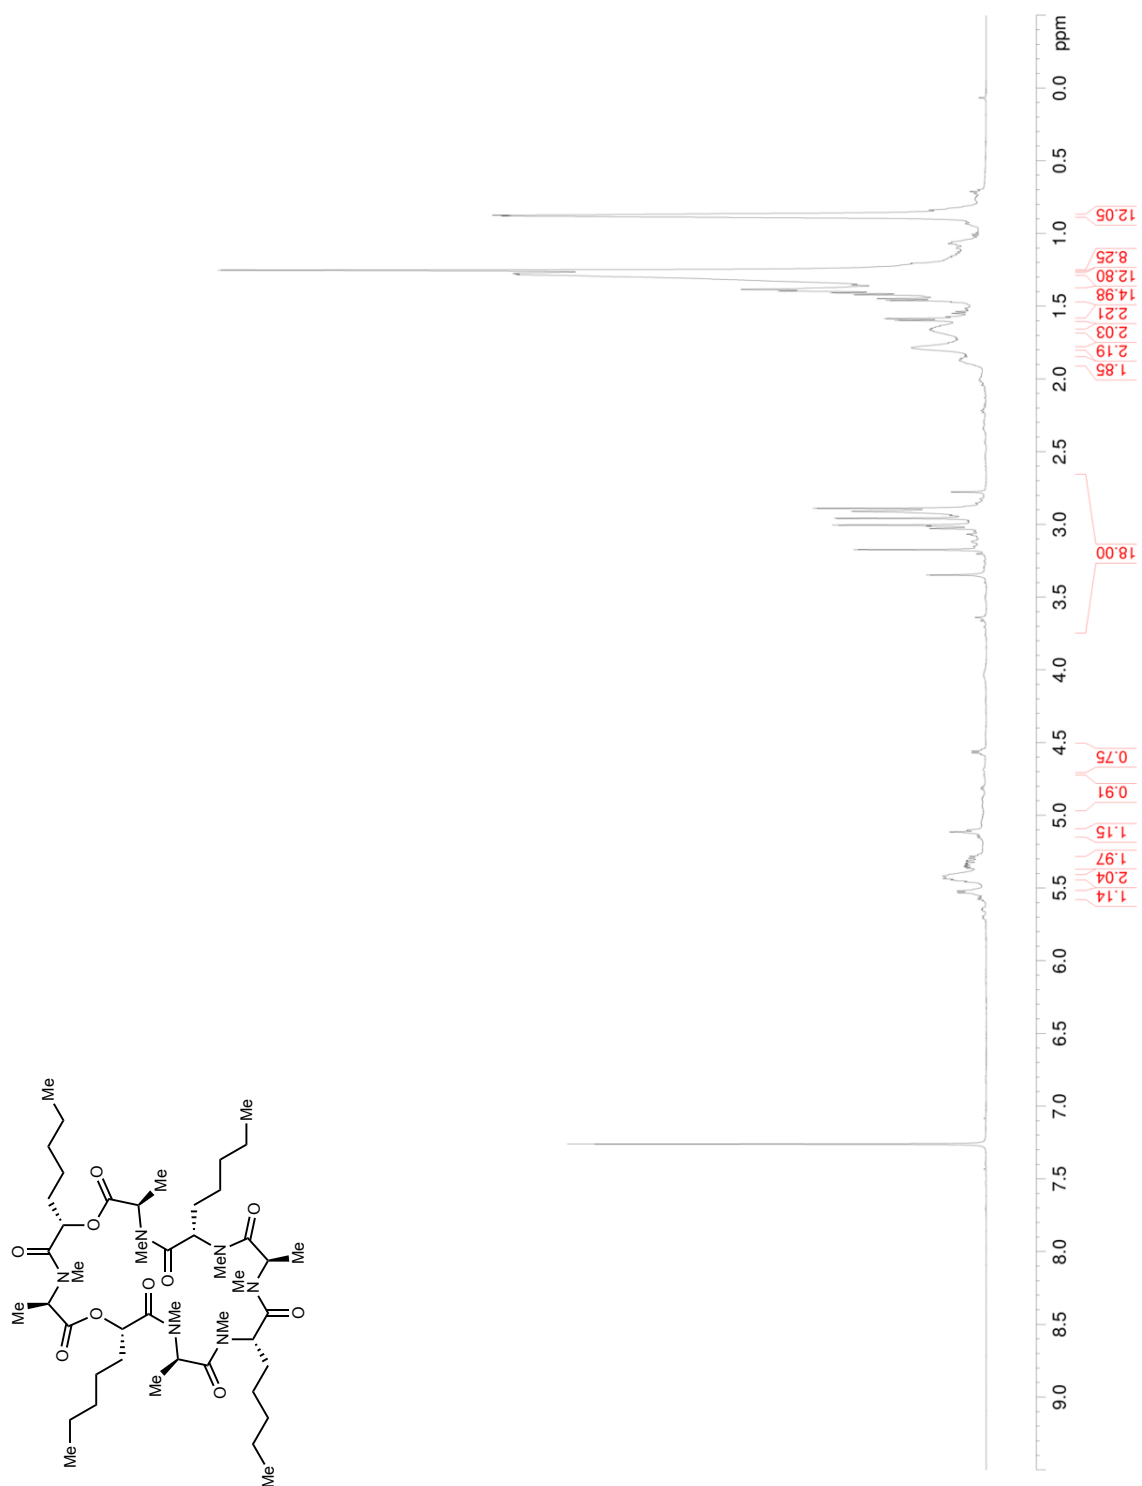

Figure S106.  $^{13}\text{C}$  NMR (150 MHz,  $\text{CDCl}_3$ ) of **3.2**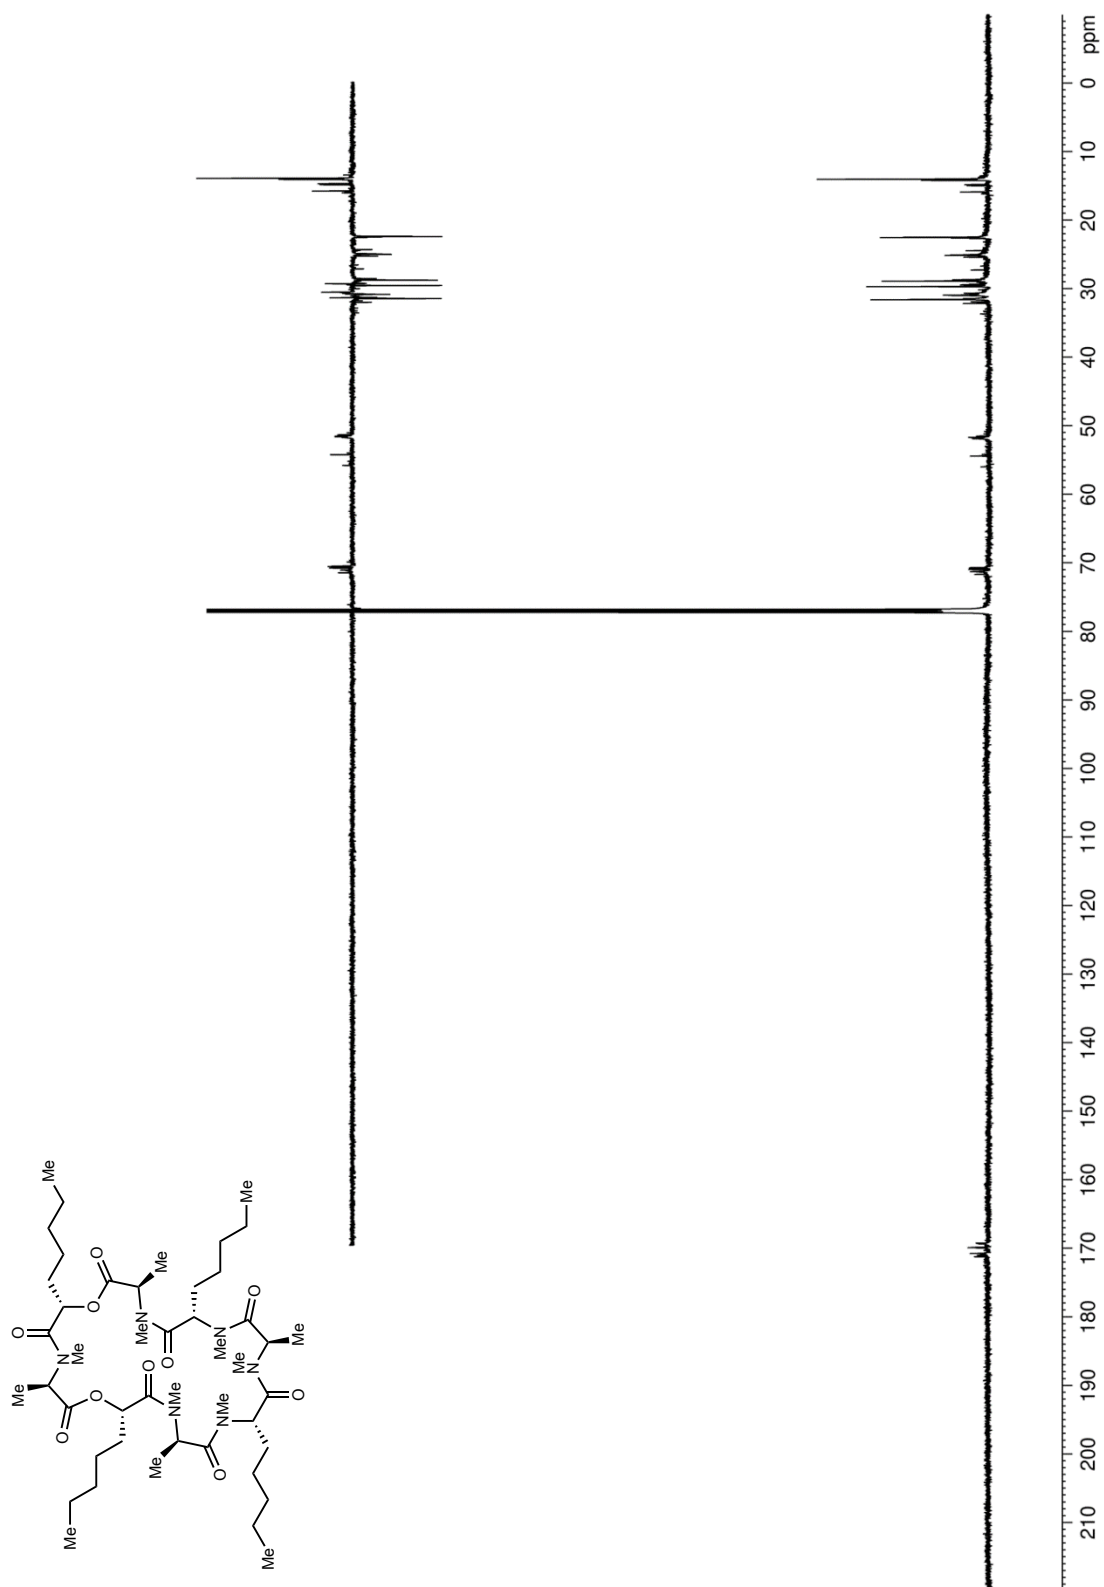

Figure S107.  $^1\text{H}$  NMR (600 MHz,  $\text{CDCl}_3$ ) of **3.3**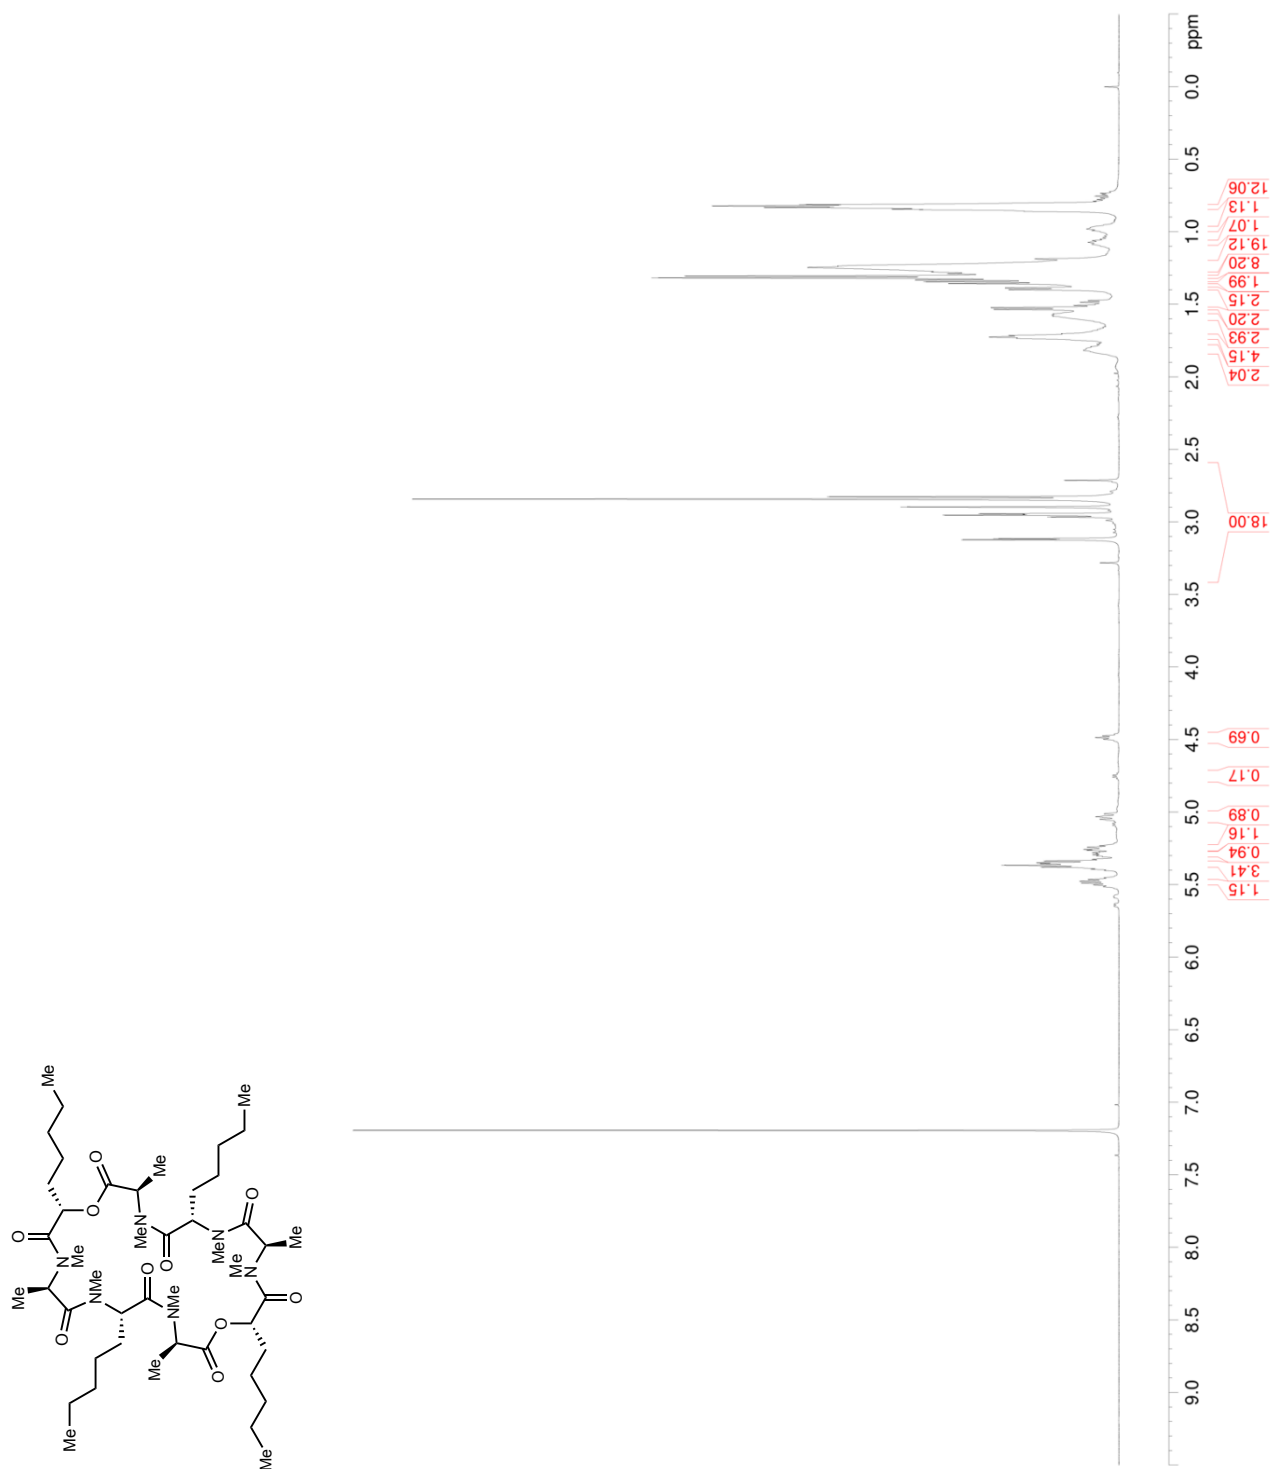



Figure S109.  $^1\text{H}$  NMR (600 MHz,  $\text{CDCl}_3$ ) of **3.4**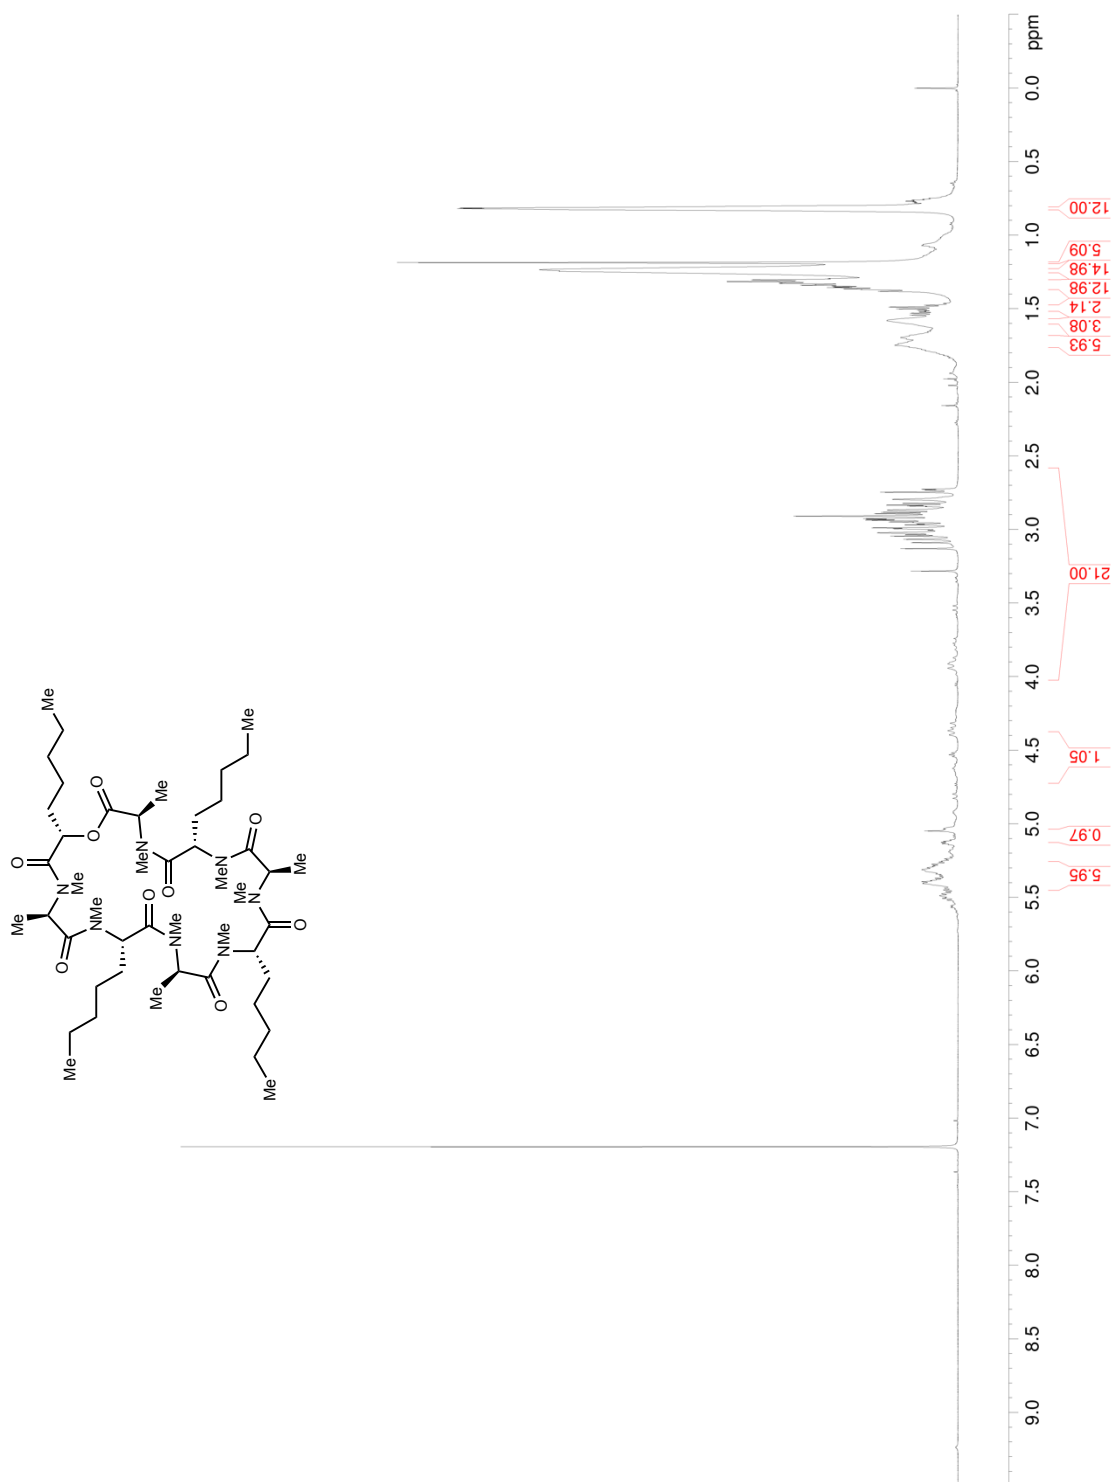

Figure S110.  $^{13}\text{C}$  NMR (150 MHz,  $\text{CDCl}_3$ ) of **3.4**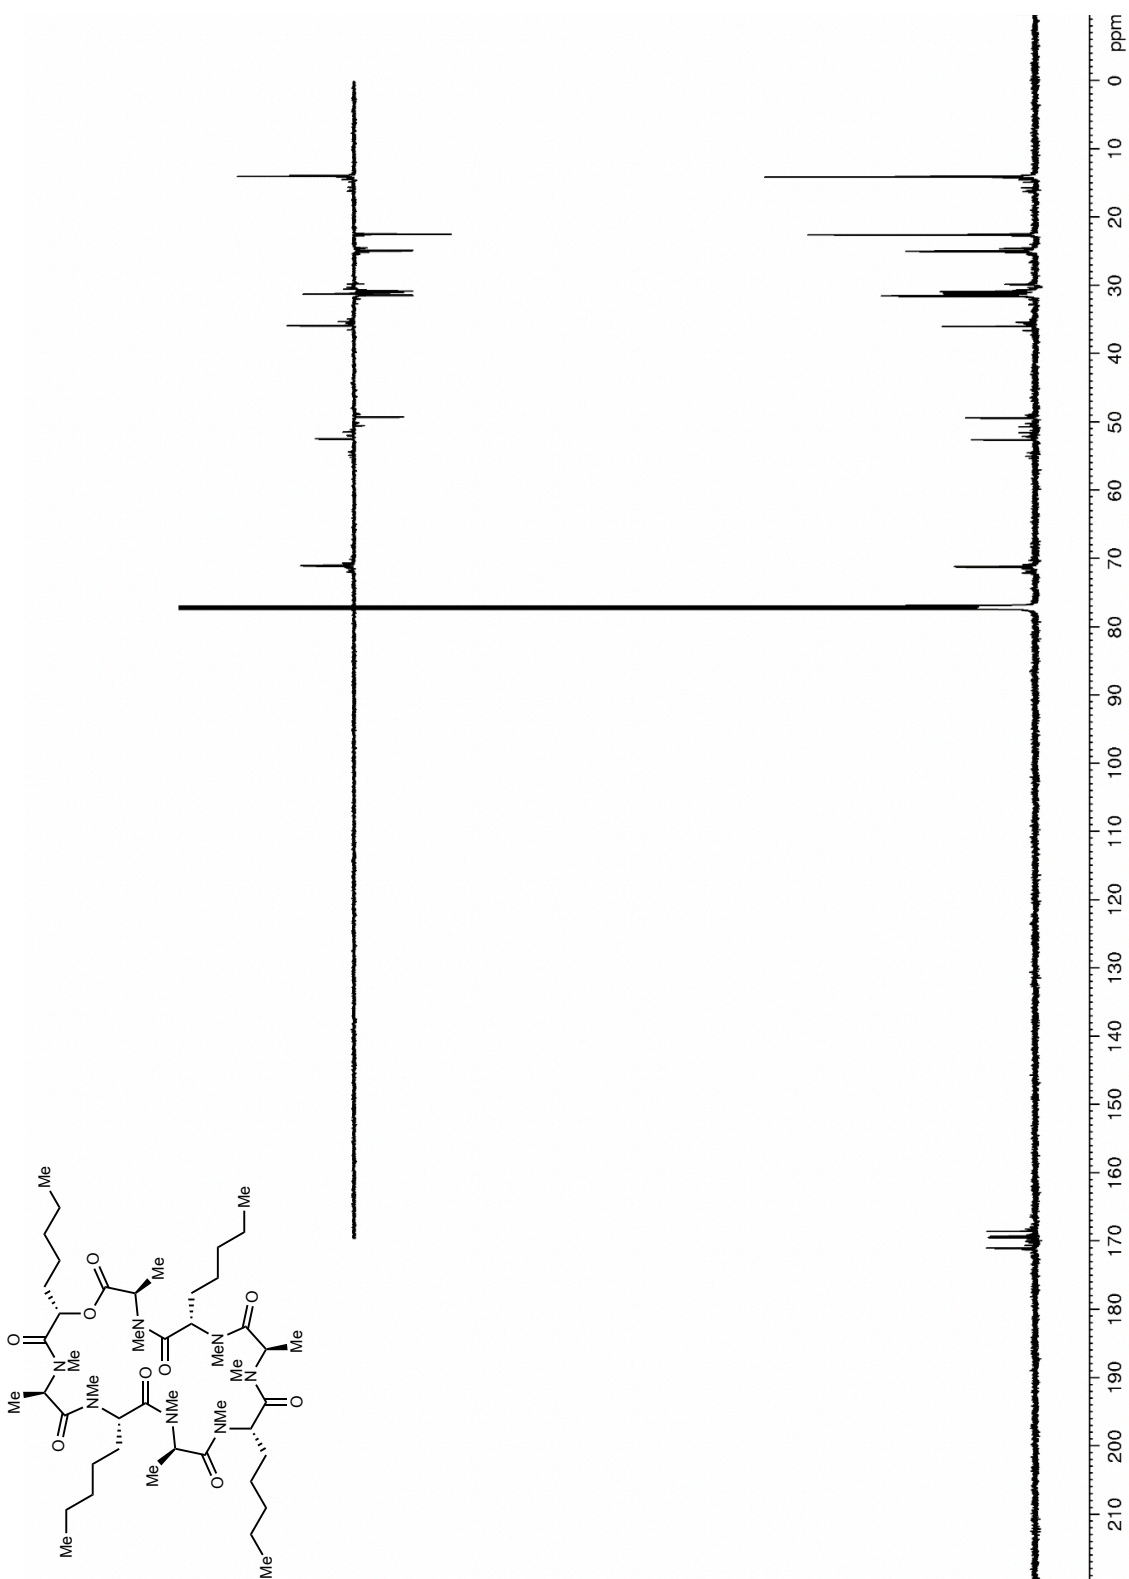

Figure S111.  $^1\text{H}$  NMR (600 MHz,  $\text{CDCl}_3$ ) of **3.5**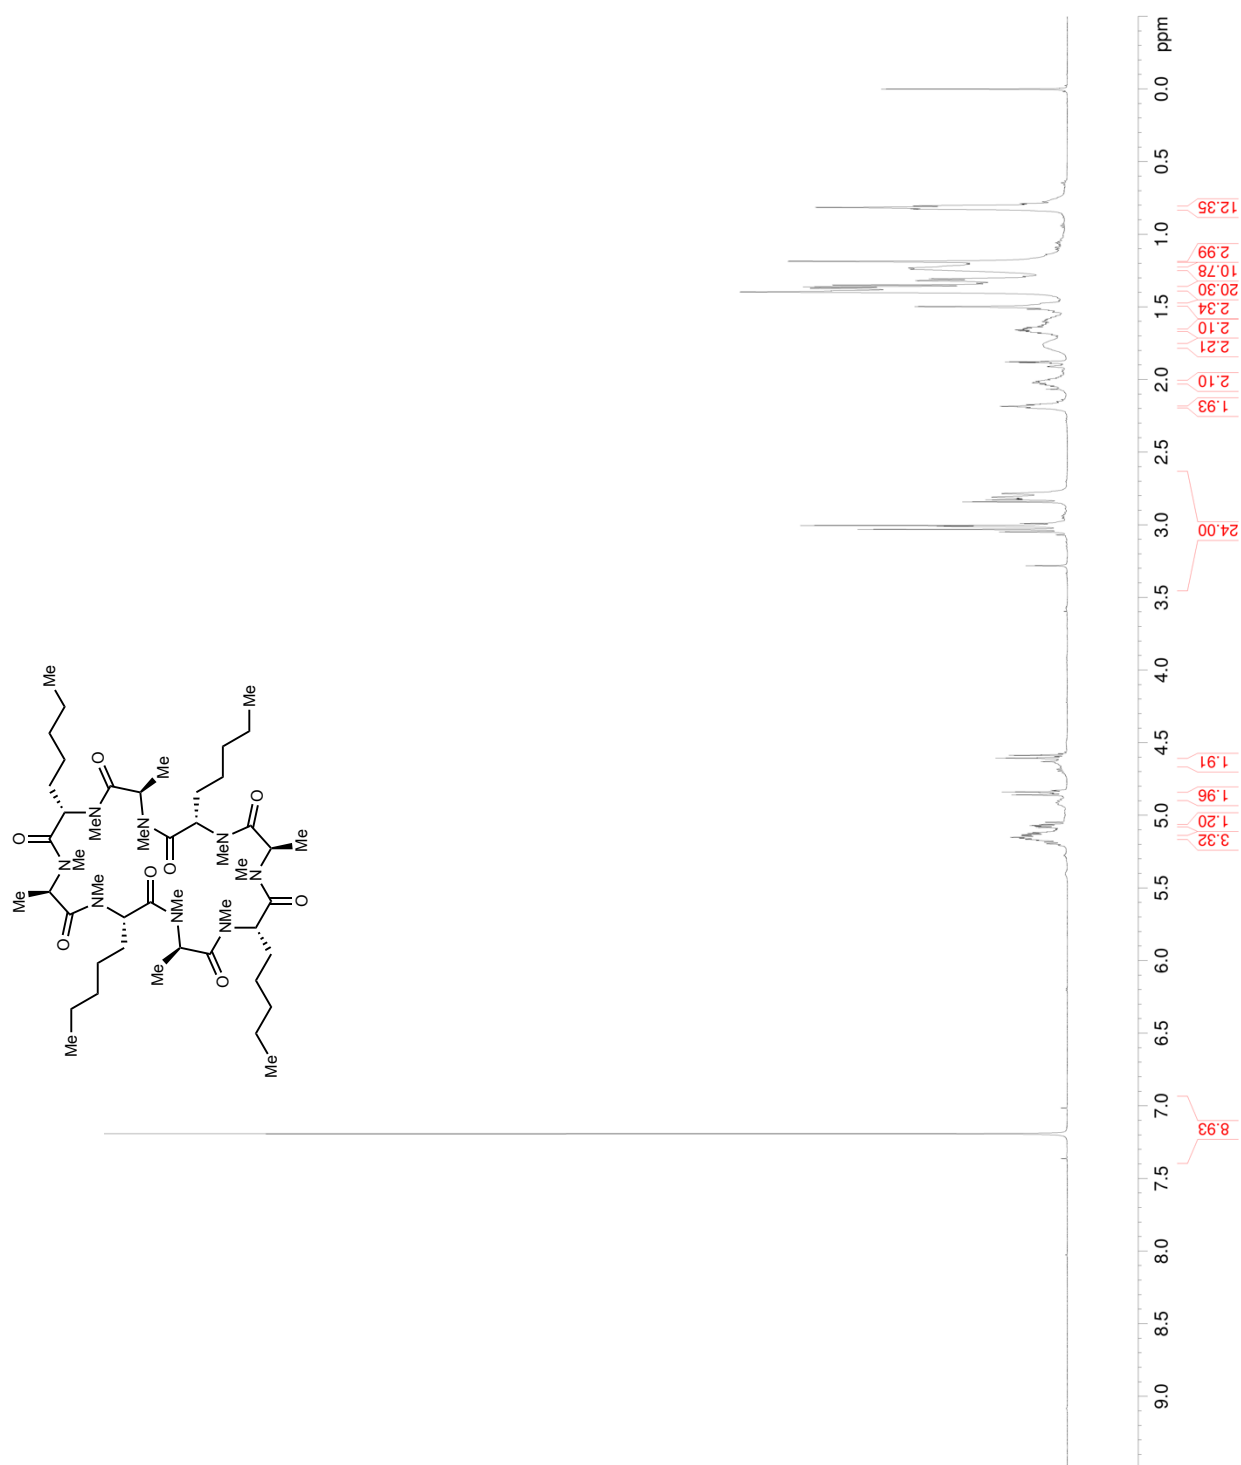

Figure S112.  $^{13}\text{C}$  NMR (150 MHz,  $\text{CDCl}_3$ ) of **3.5**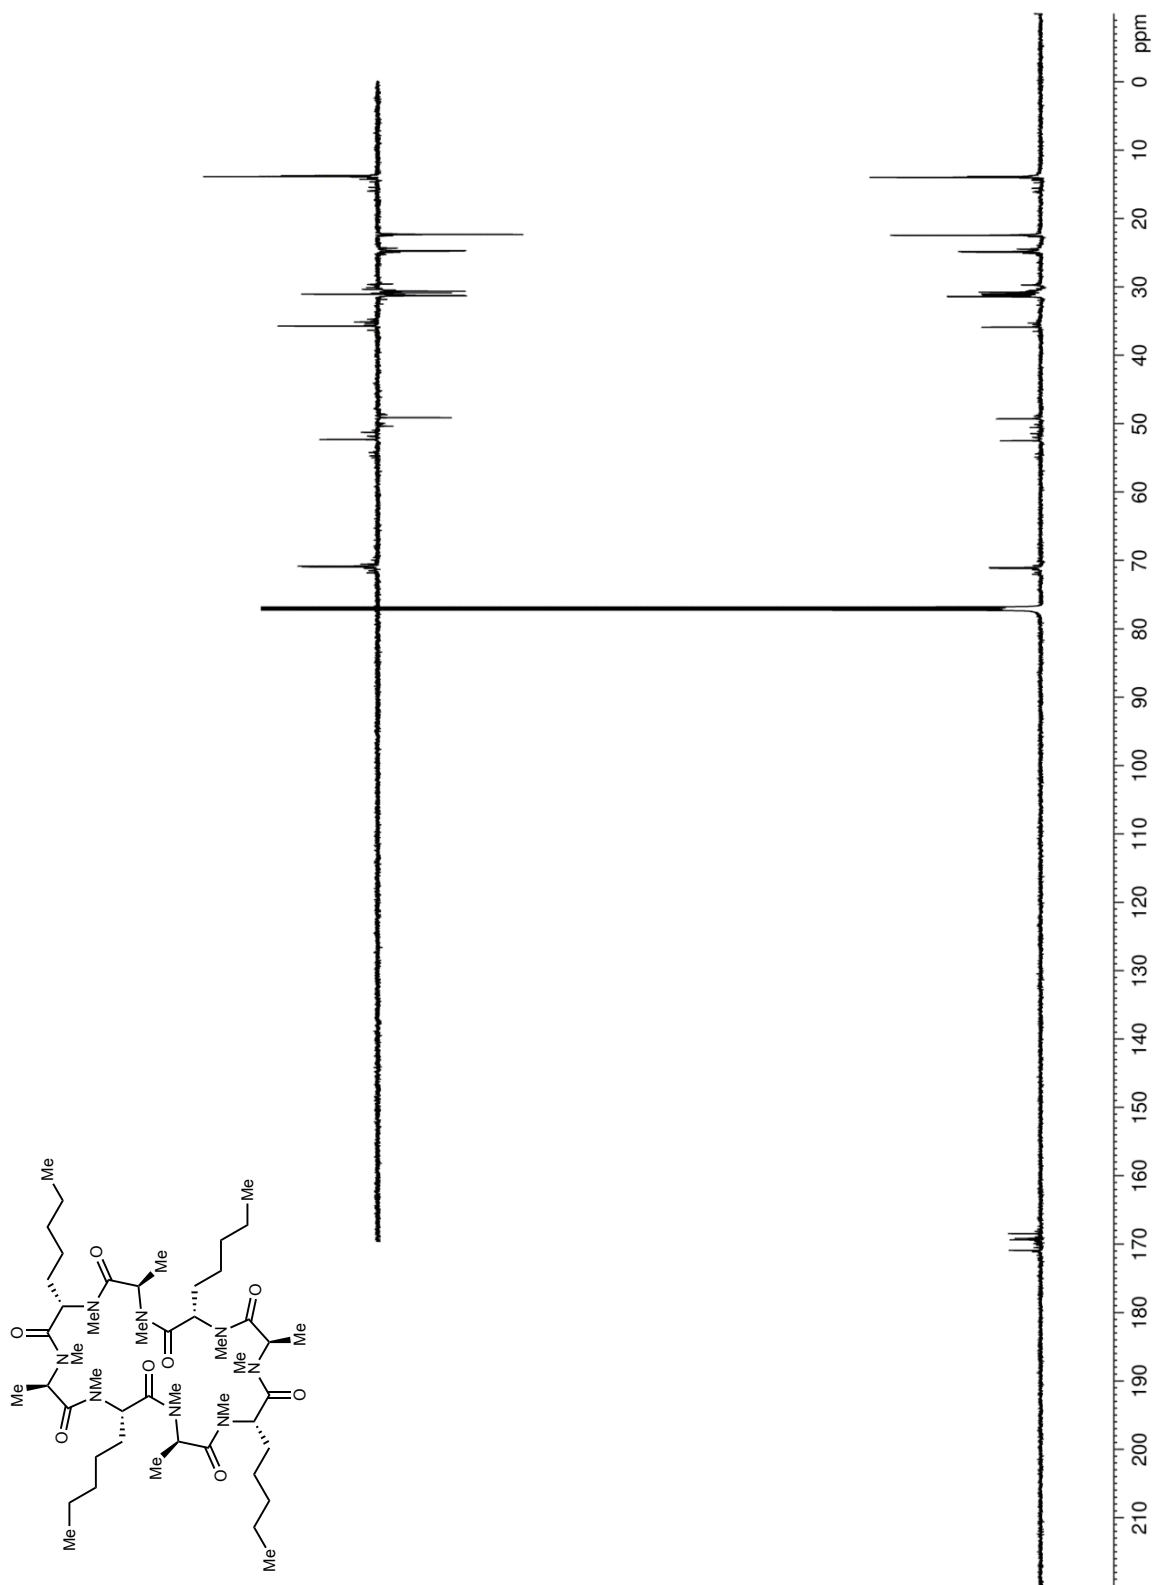





Figure S114.  $^{13}\text{C}$  NMR (150 MHz,  $\text{CDCl}_3$ ) of 4.2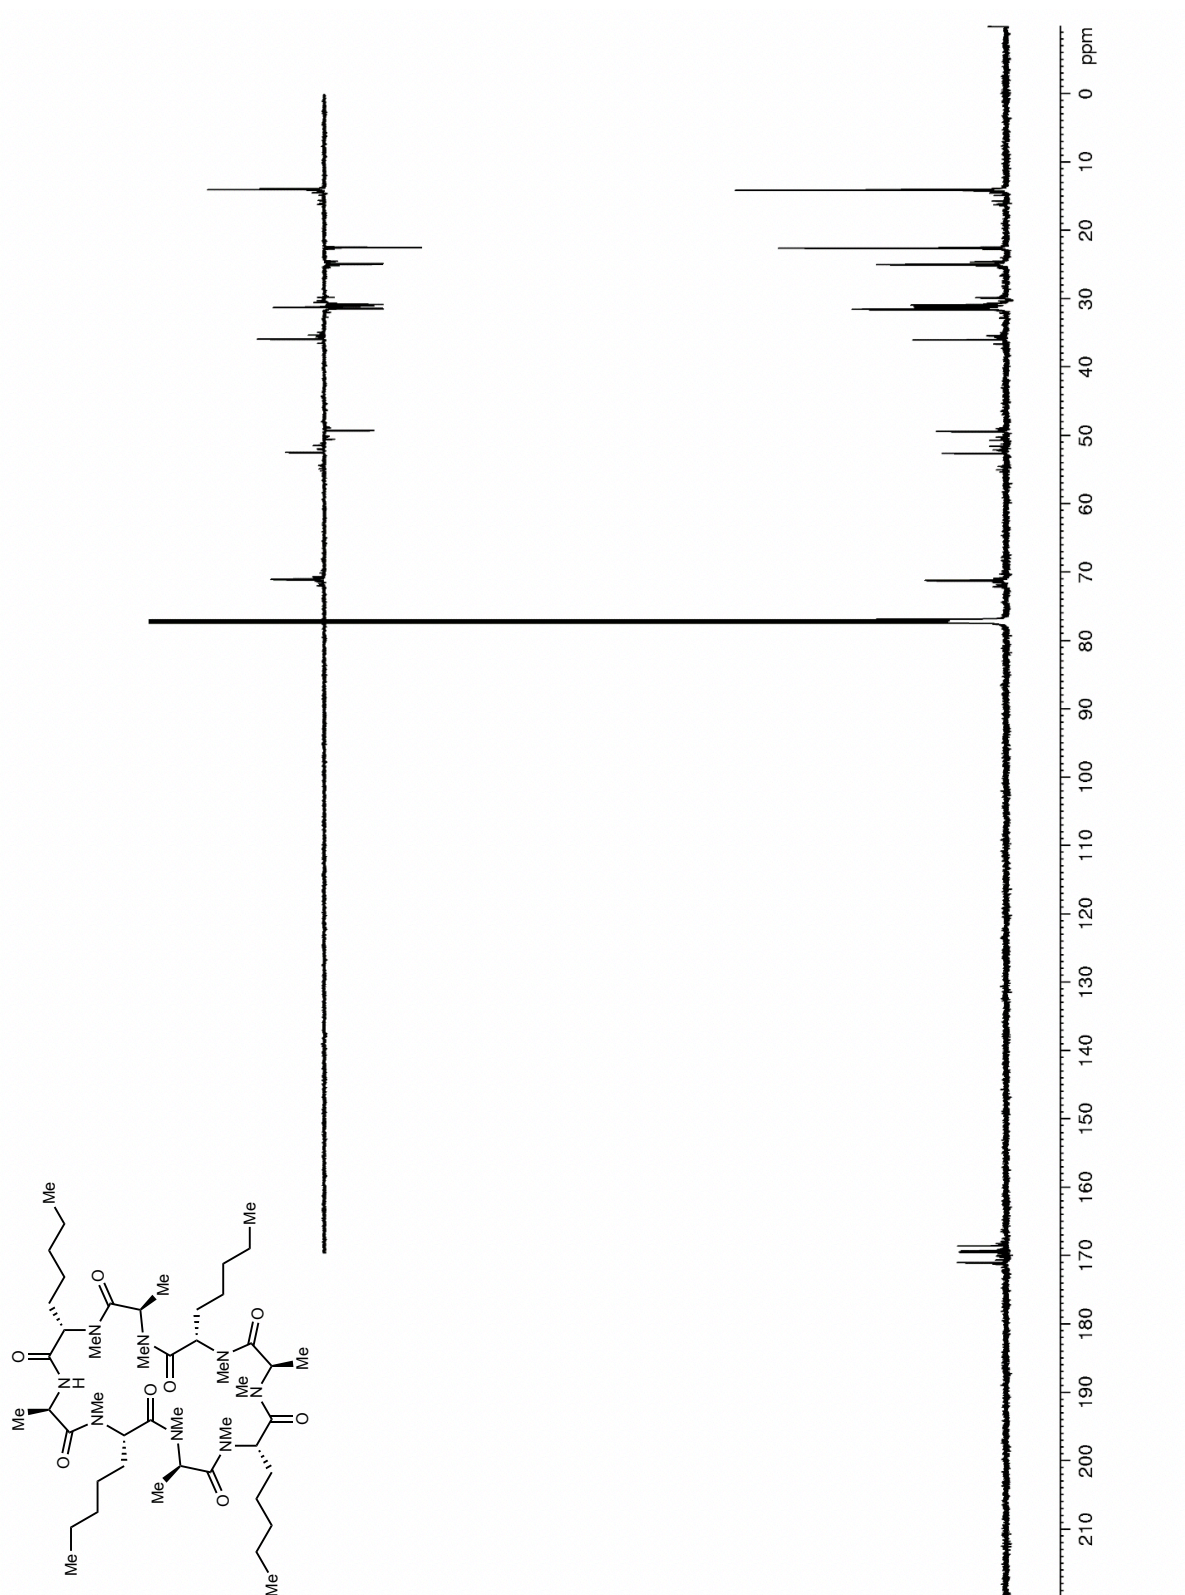

Figure S115.  $^1\text{H}$  NMR (600 MHz,  $\text{CDCl}_3$ ) of 4.3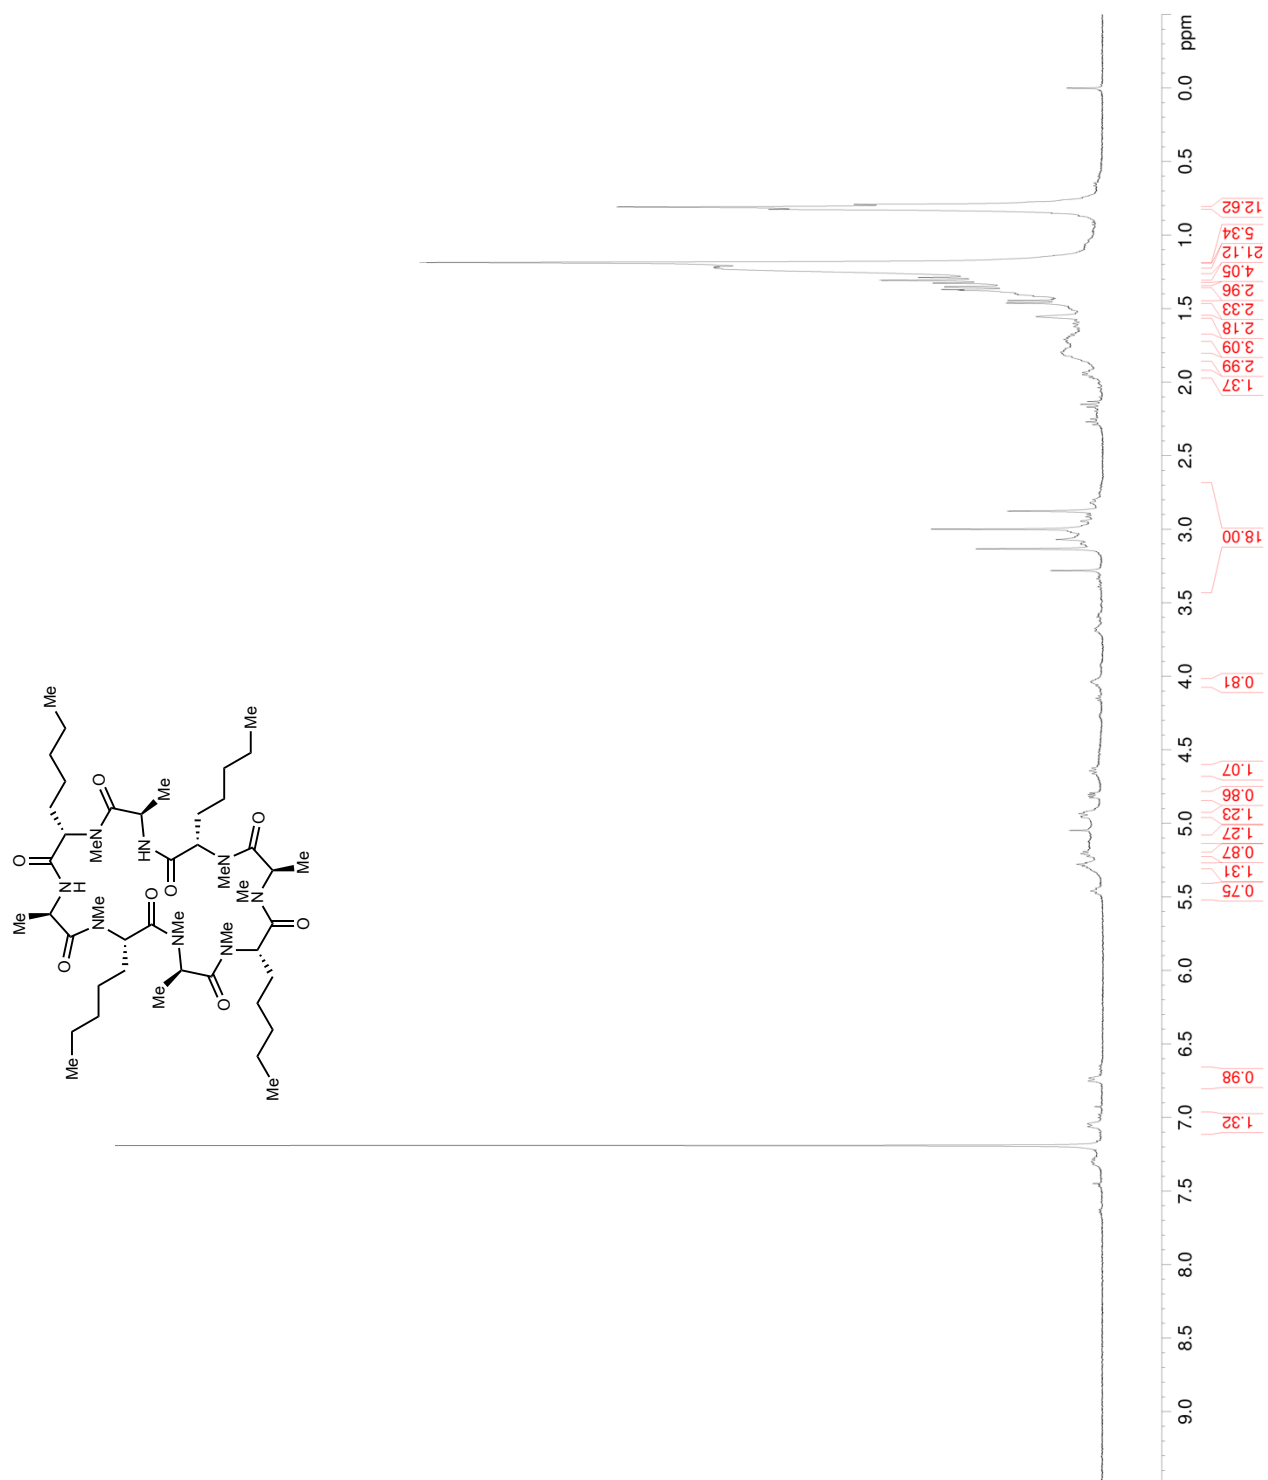

Figure S116.  $^{13}\text{C}$  NMR (150 MHz,  $\text{CDCl}_3$ ) of 4.3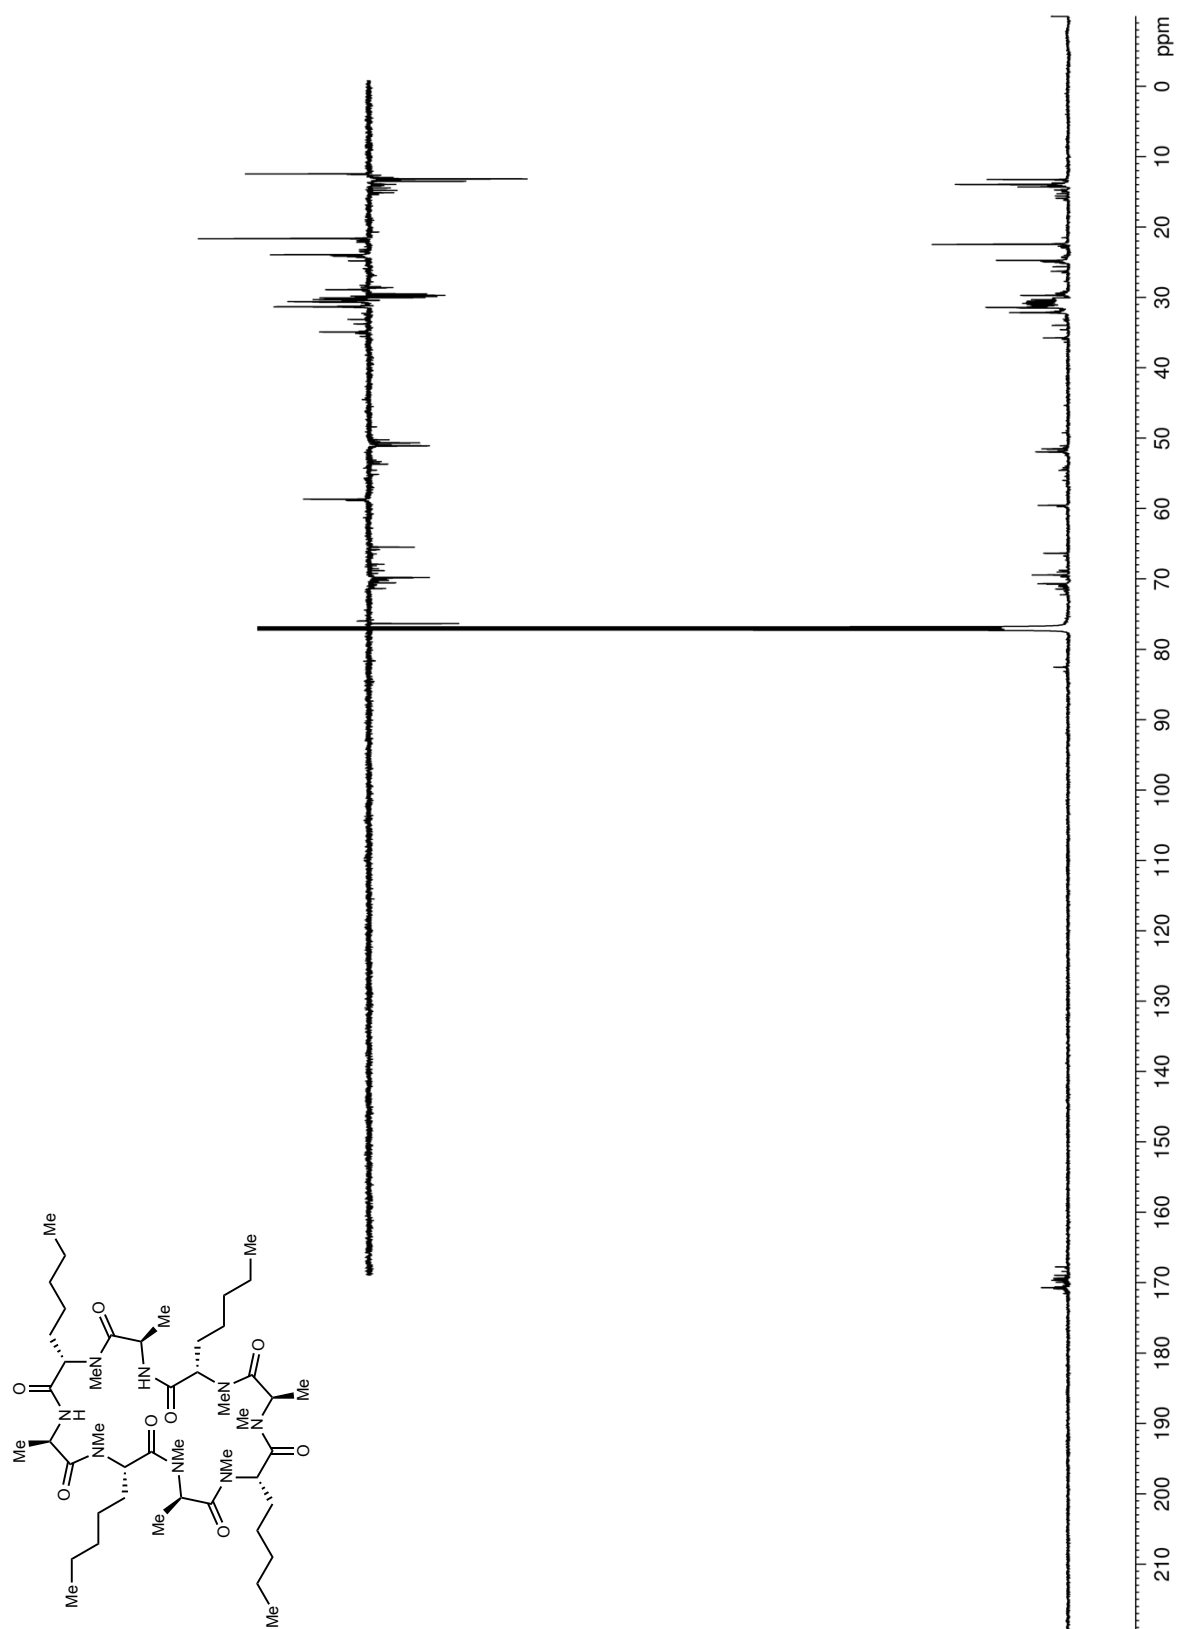

Figure S117.  $^1\text{H}$  NMR (600 MHz,  $\text{CDCl}_3$ ) of 4.4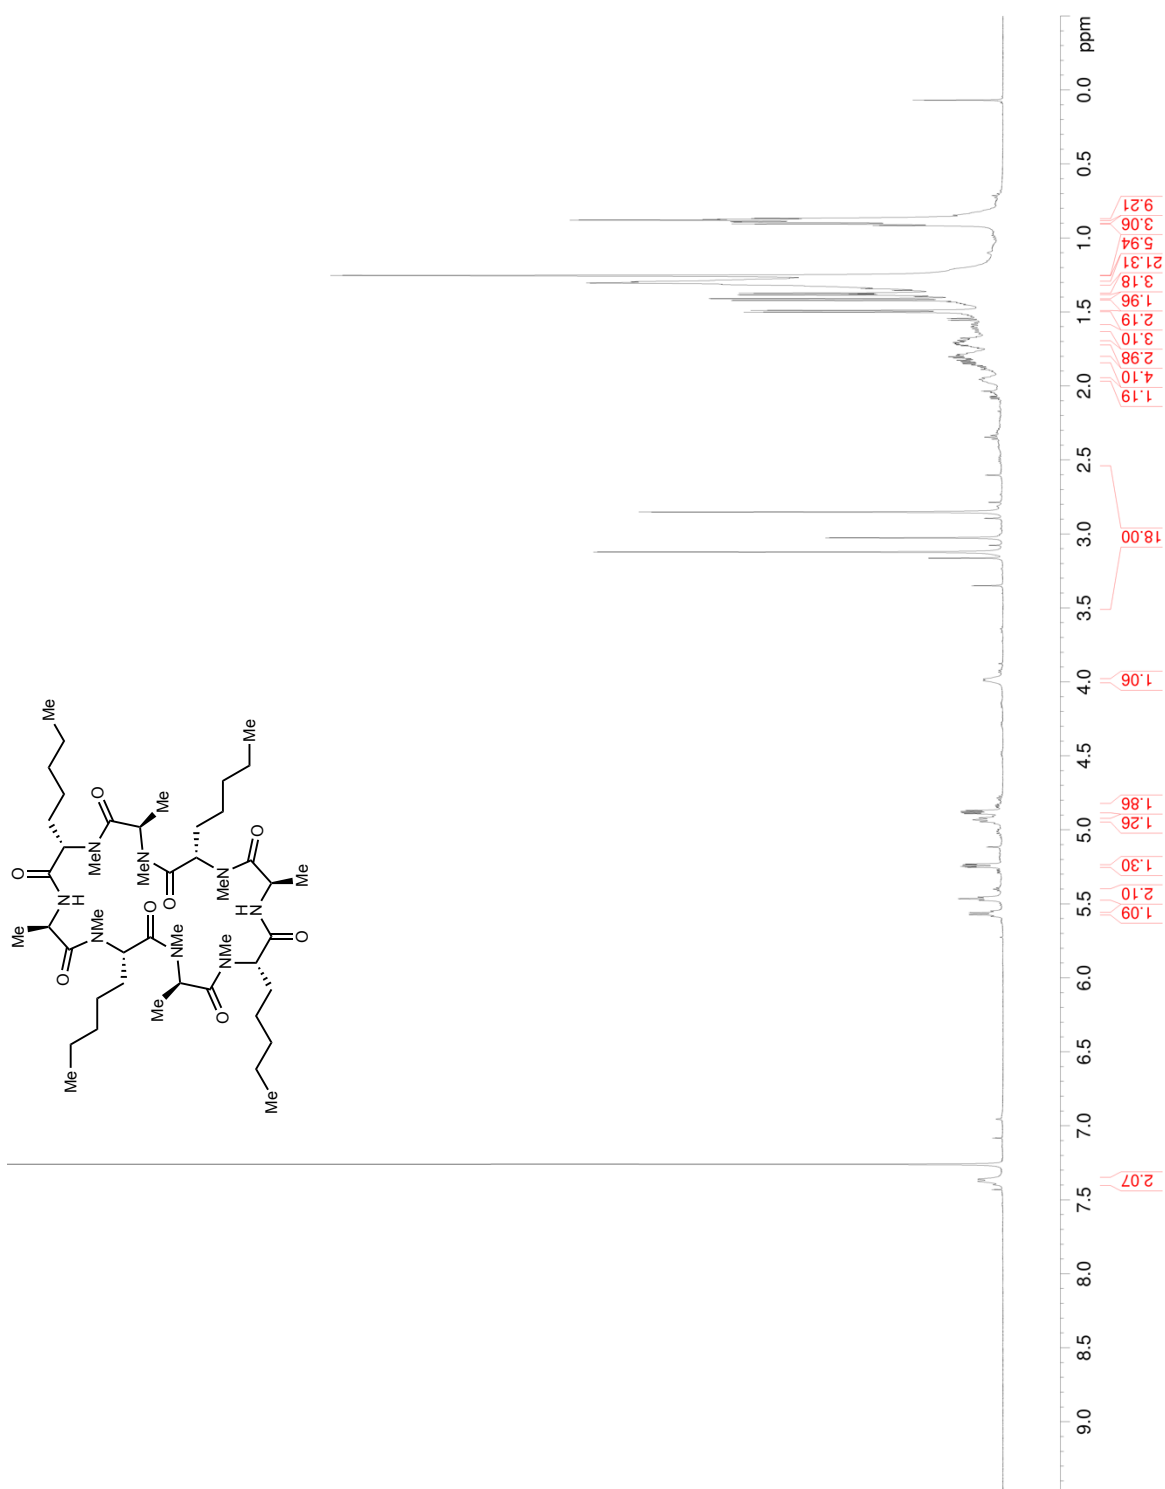

Figure S118.  $^{13}\text{C}$  NMR (150 MHz,  $\text{CDCl}_3$ ) of 4.4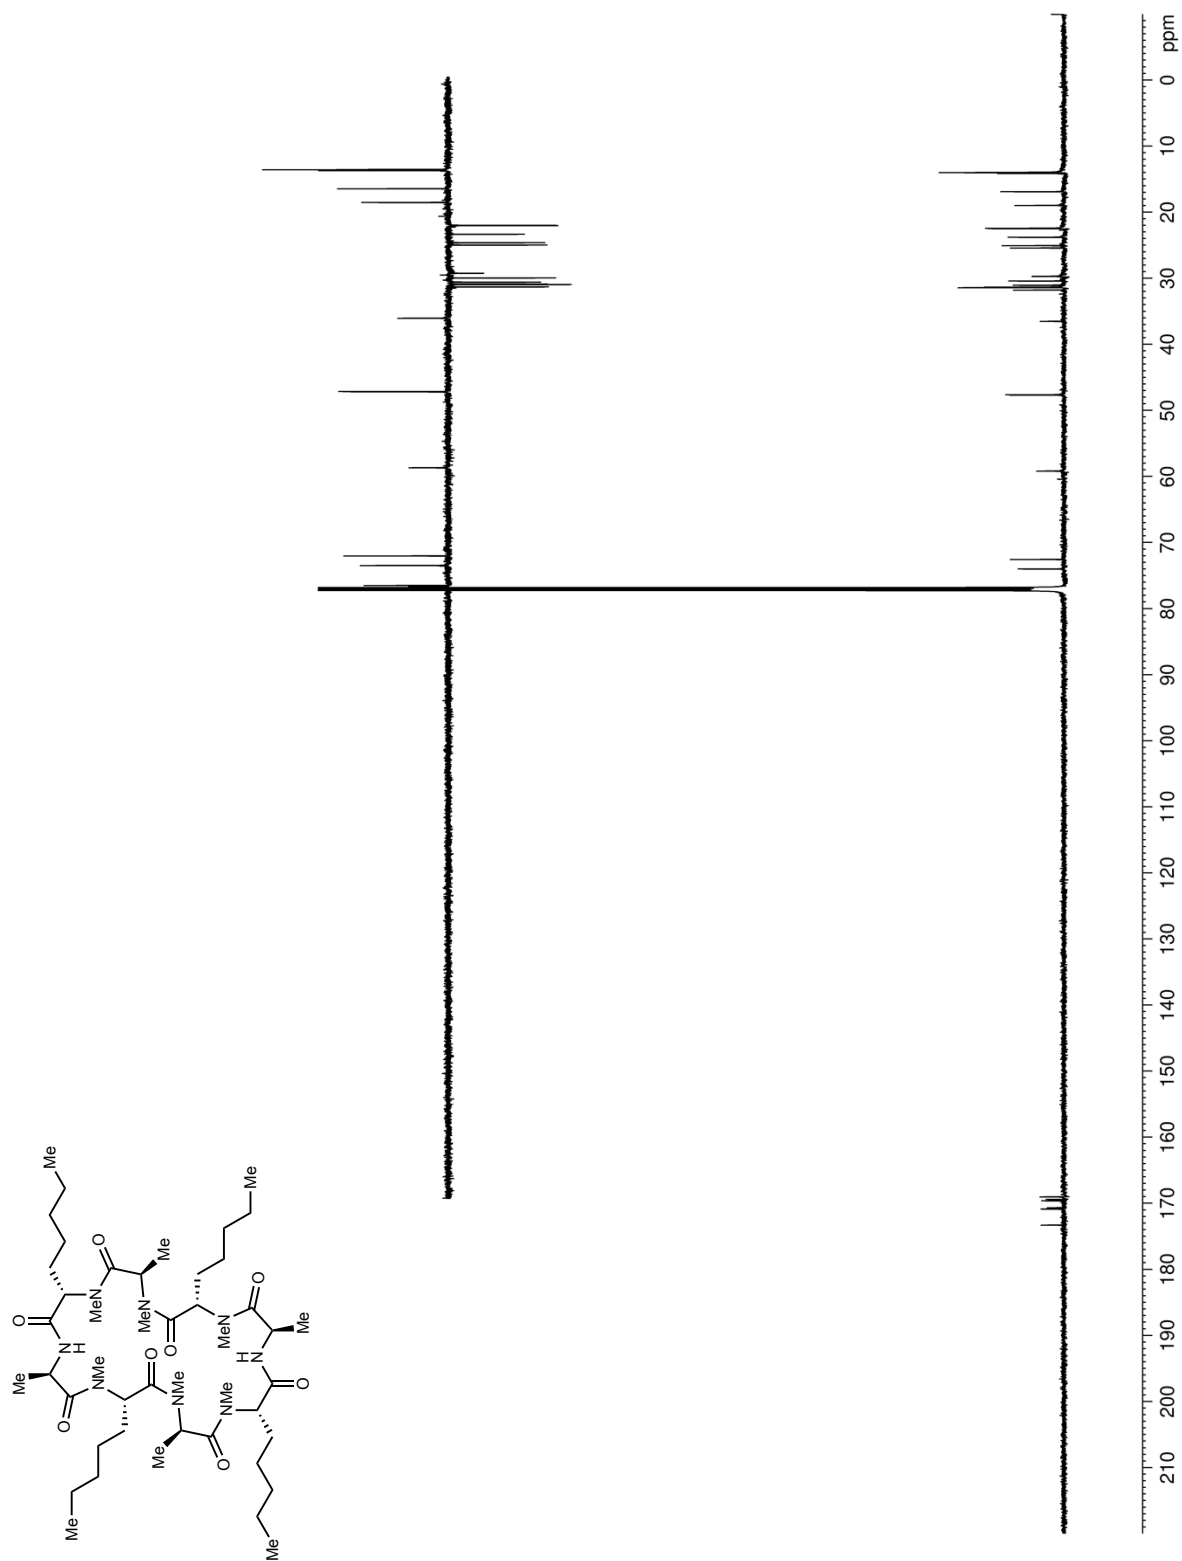

Figure S119.  $^1\text{H}$  NMR (600 MHz,  $\text{CDCl}_3$ ) of **4.5**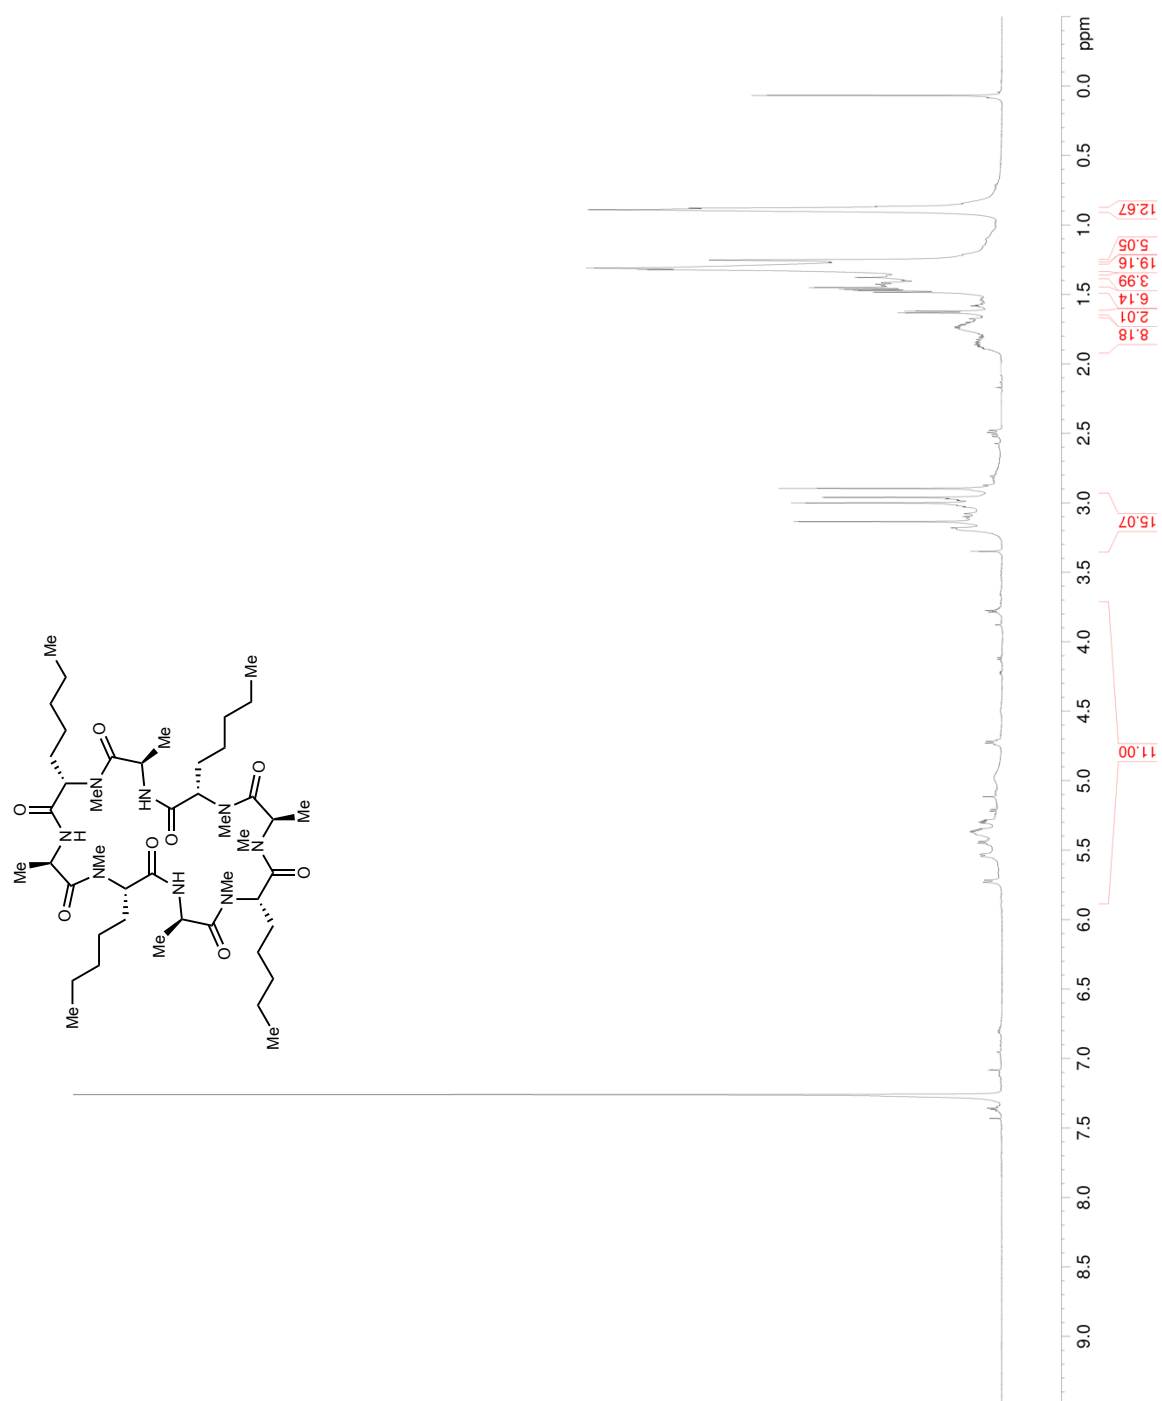

Figure S120.  $^{13}\text{C}$  NMR (150 MHz,  $\text{CDCl}_3$ ) of 4.5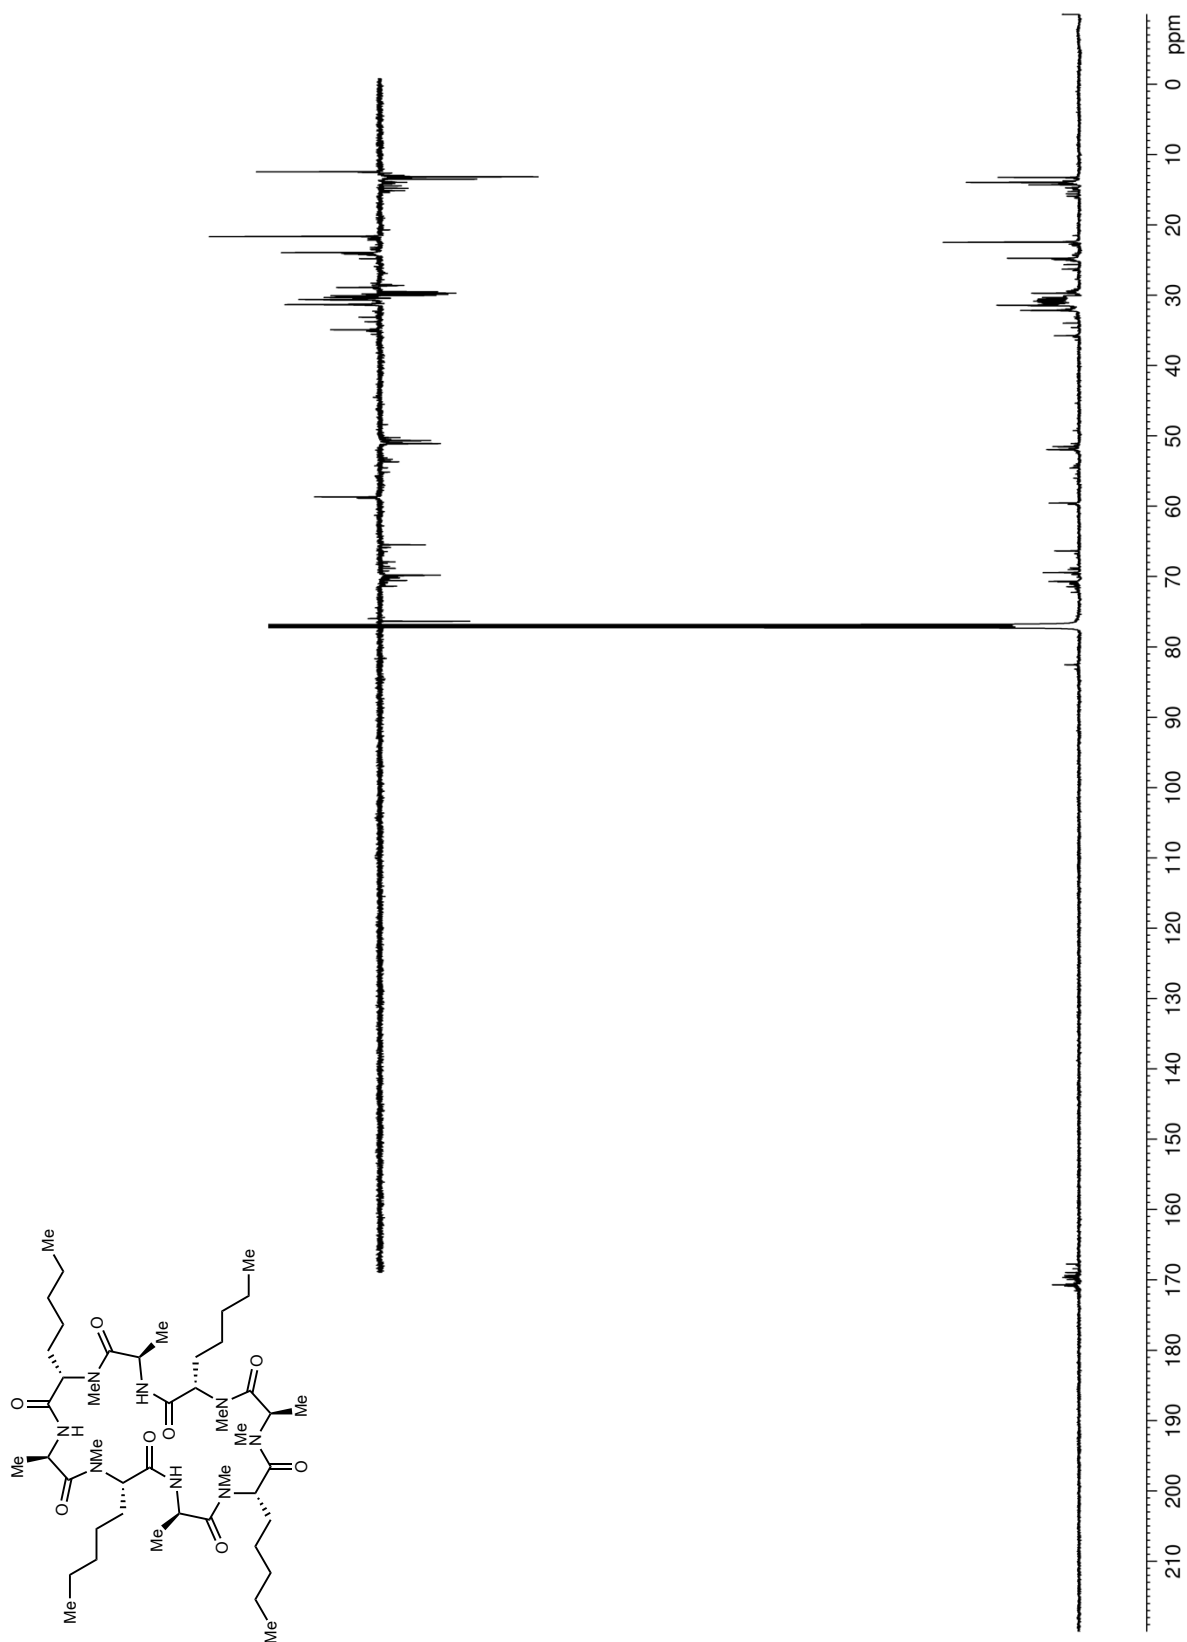



Figure S121.  $^1\text{H}$  NMR (600 MHz,  $\text{CDCl}_3$ ) of 4.6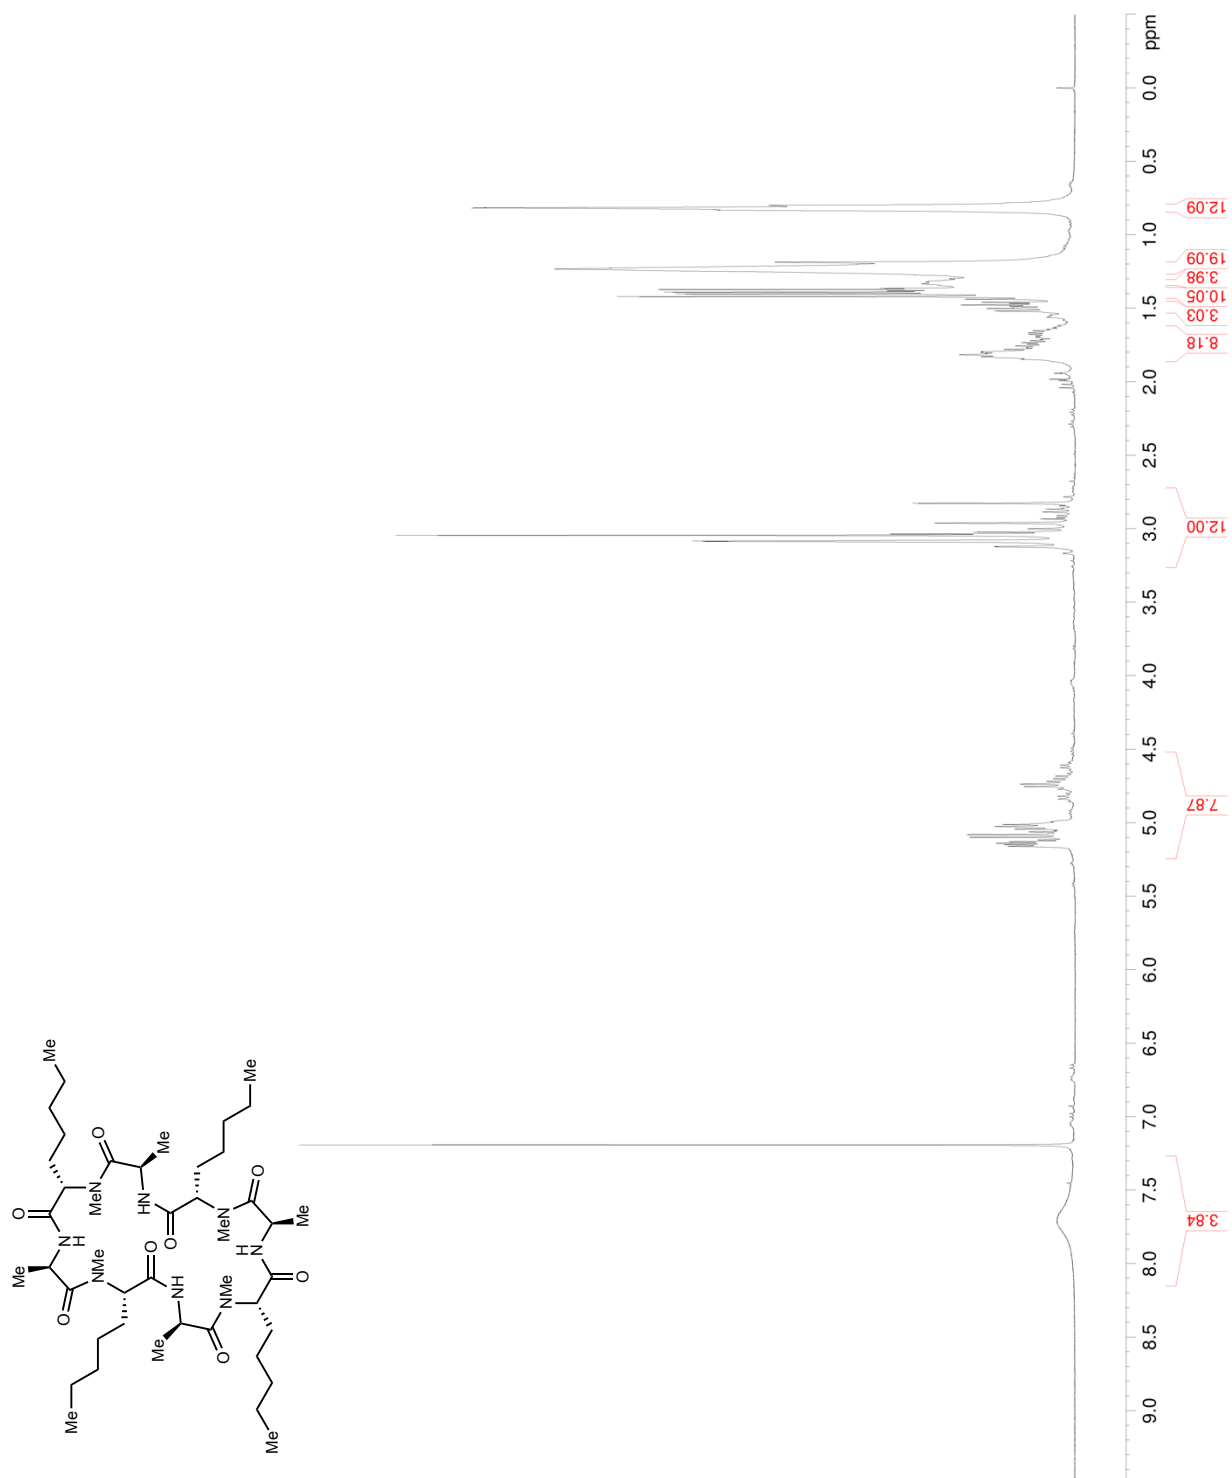



Figure S123.  $^1\text{H}$  NMR (600 MHz,  $\text{CDCl}_3$ ) of 5.2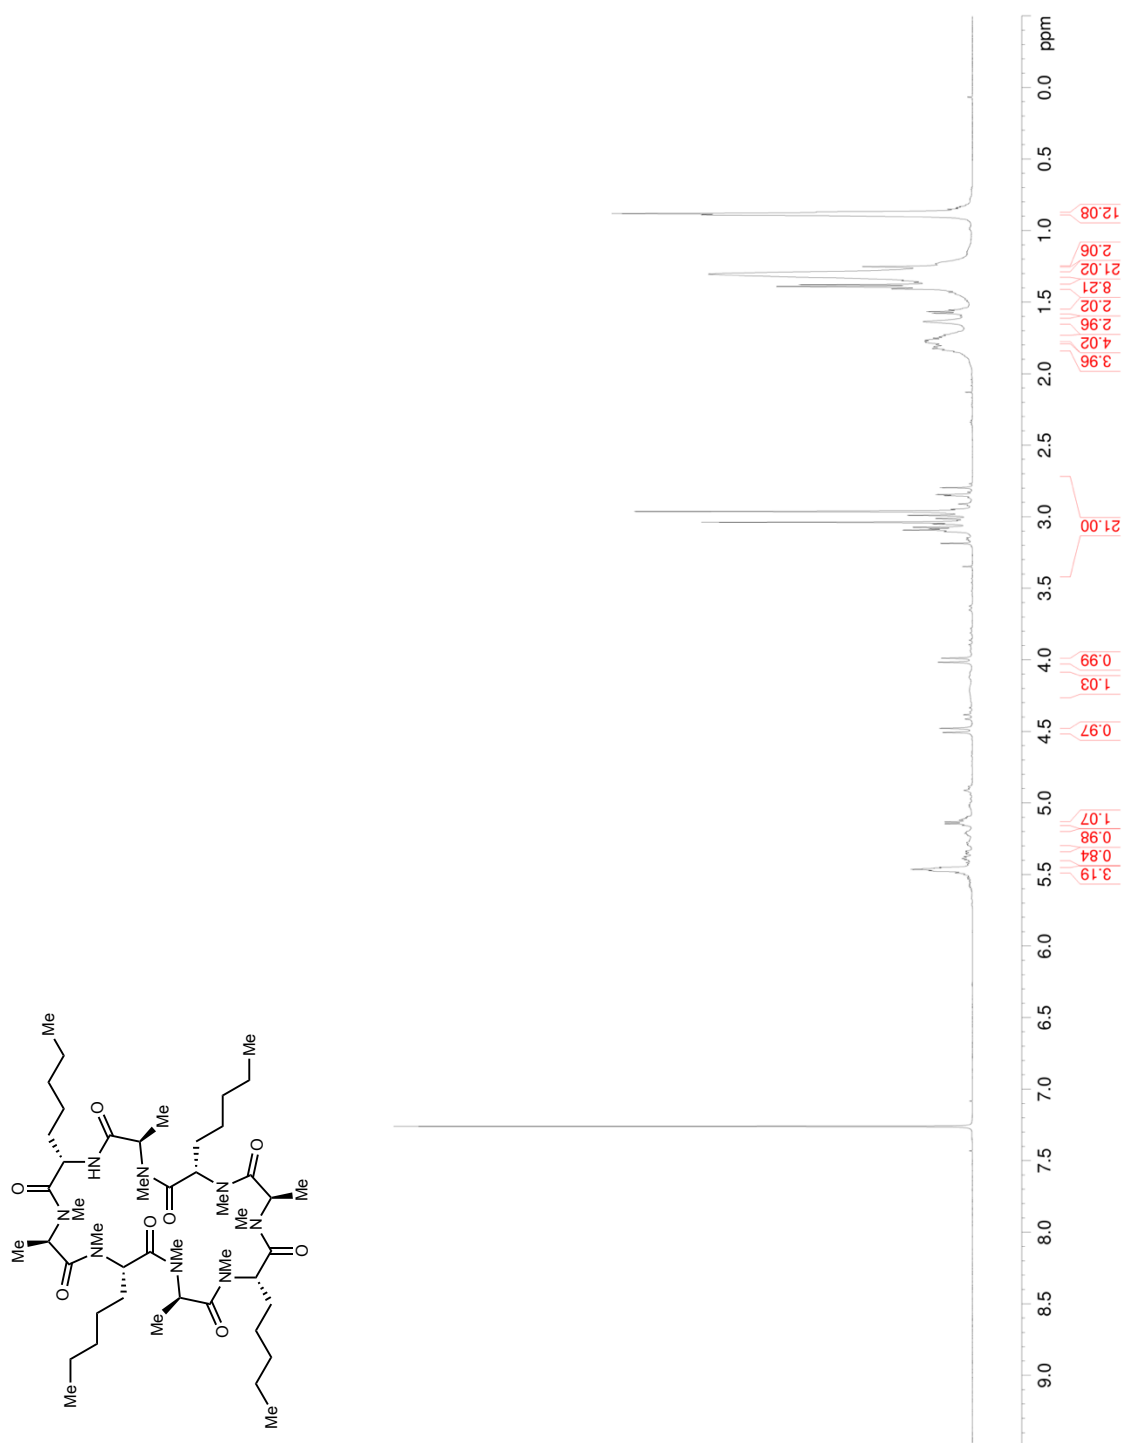

Figure S124.  $^{13}\text{C}$  NMR (150 MHz,  $\text{CDCl}_3$ ) of 5.2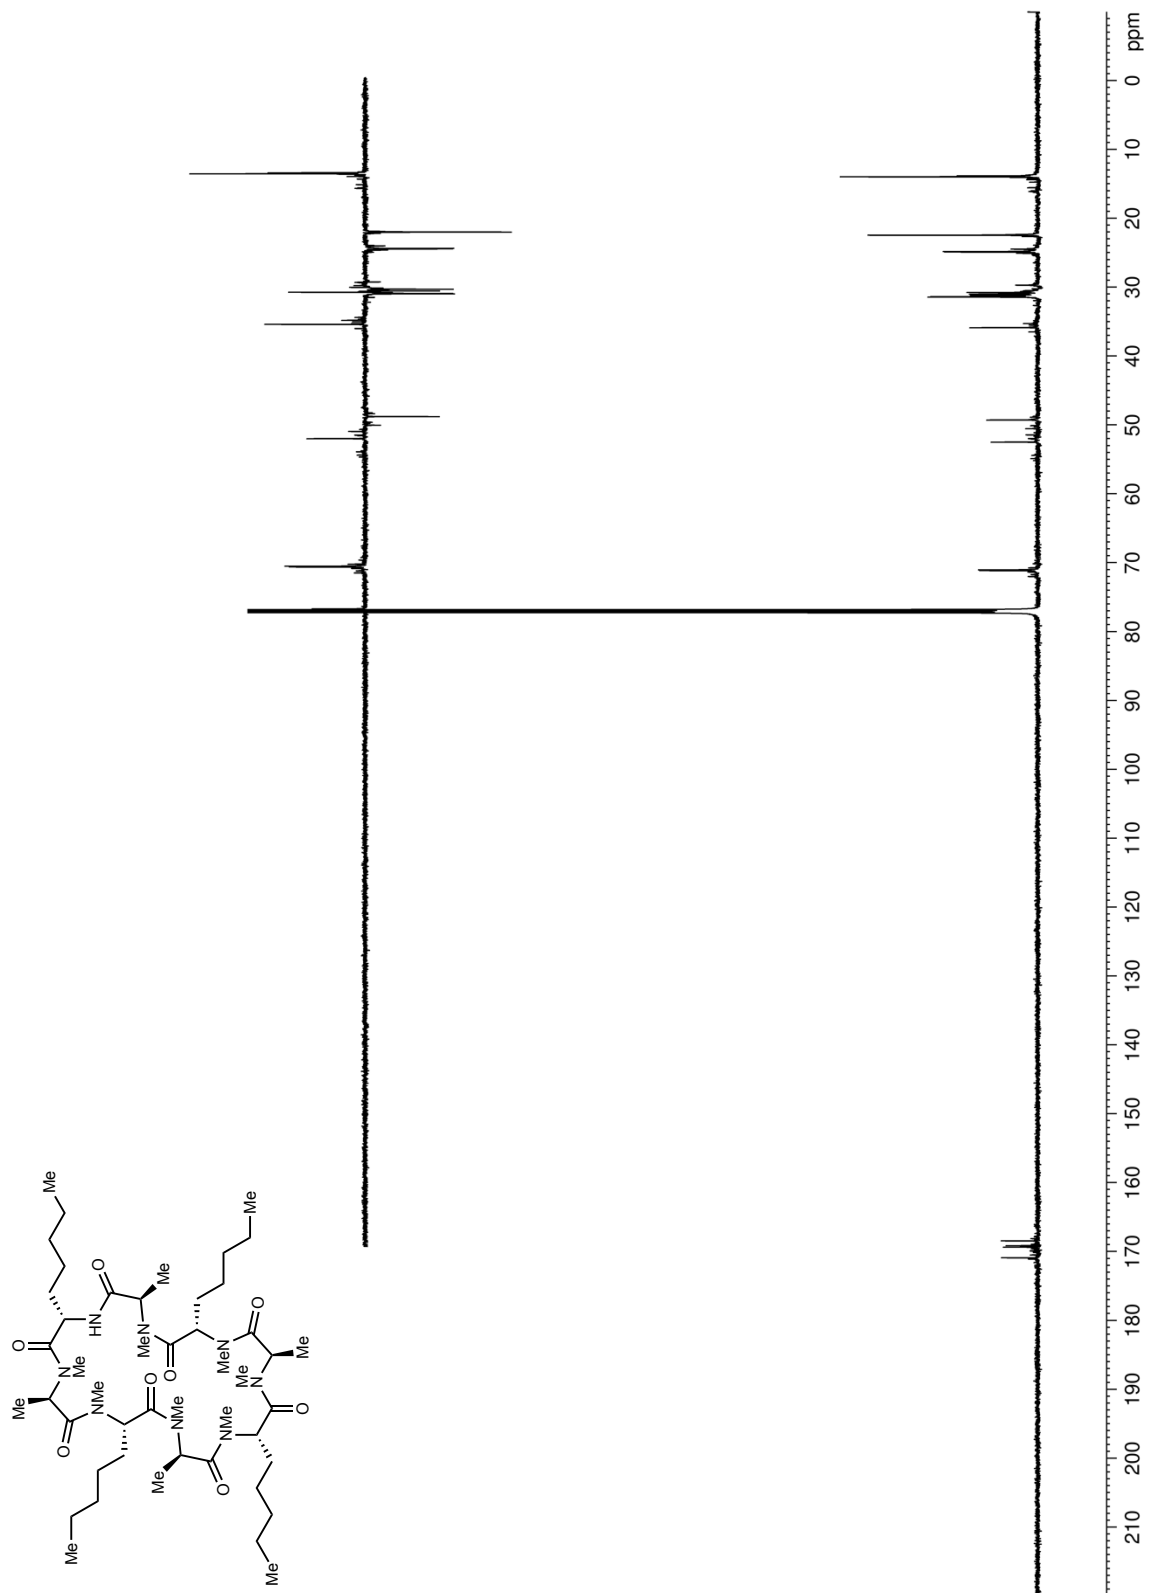

Figure S125.  $^1\text{H}$  NMR (600 MHz,  $\text{CDCl}_3$ ) of 5.3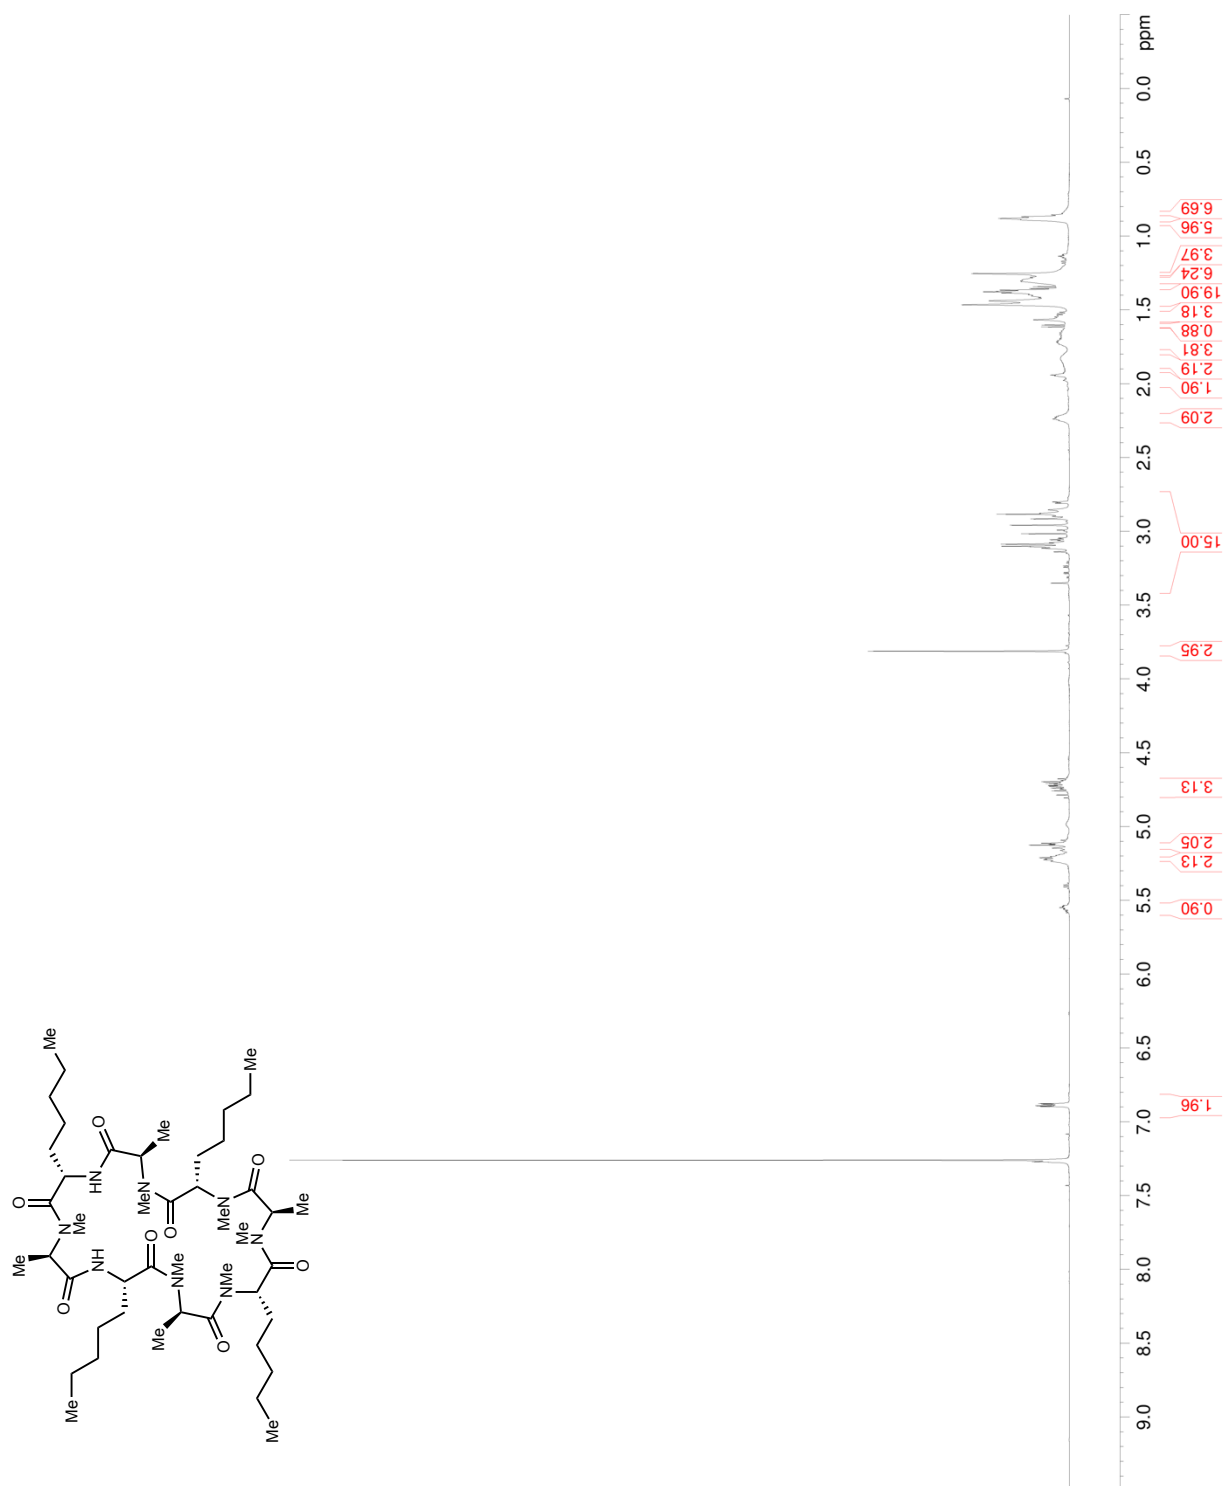

Figure S126.  $^{13}\text{C}$  NMR (150 MHz,  $\text{CDCl}_3$ ) of 5.3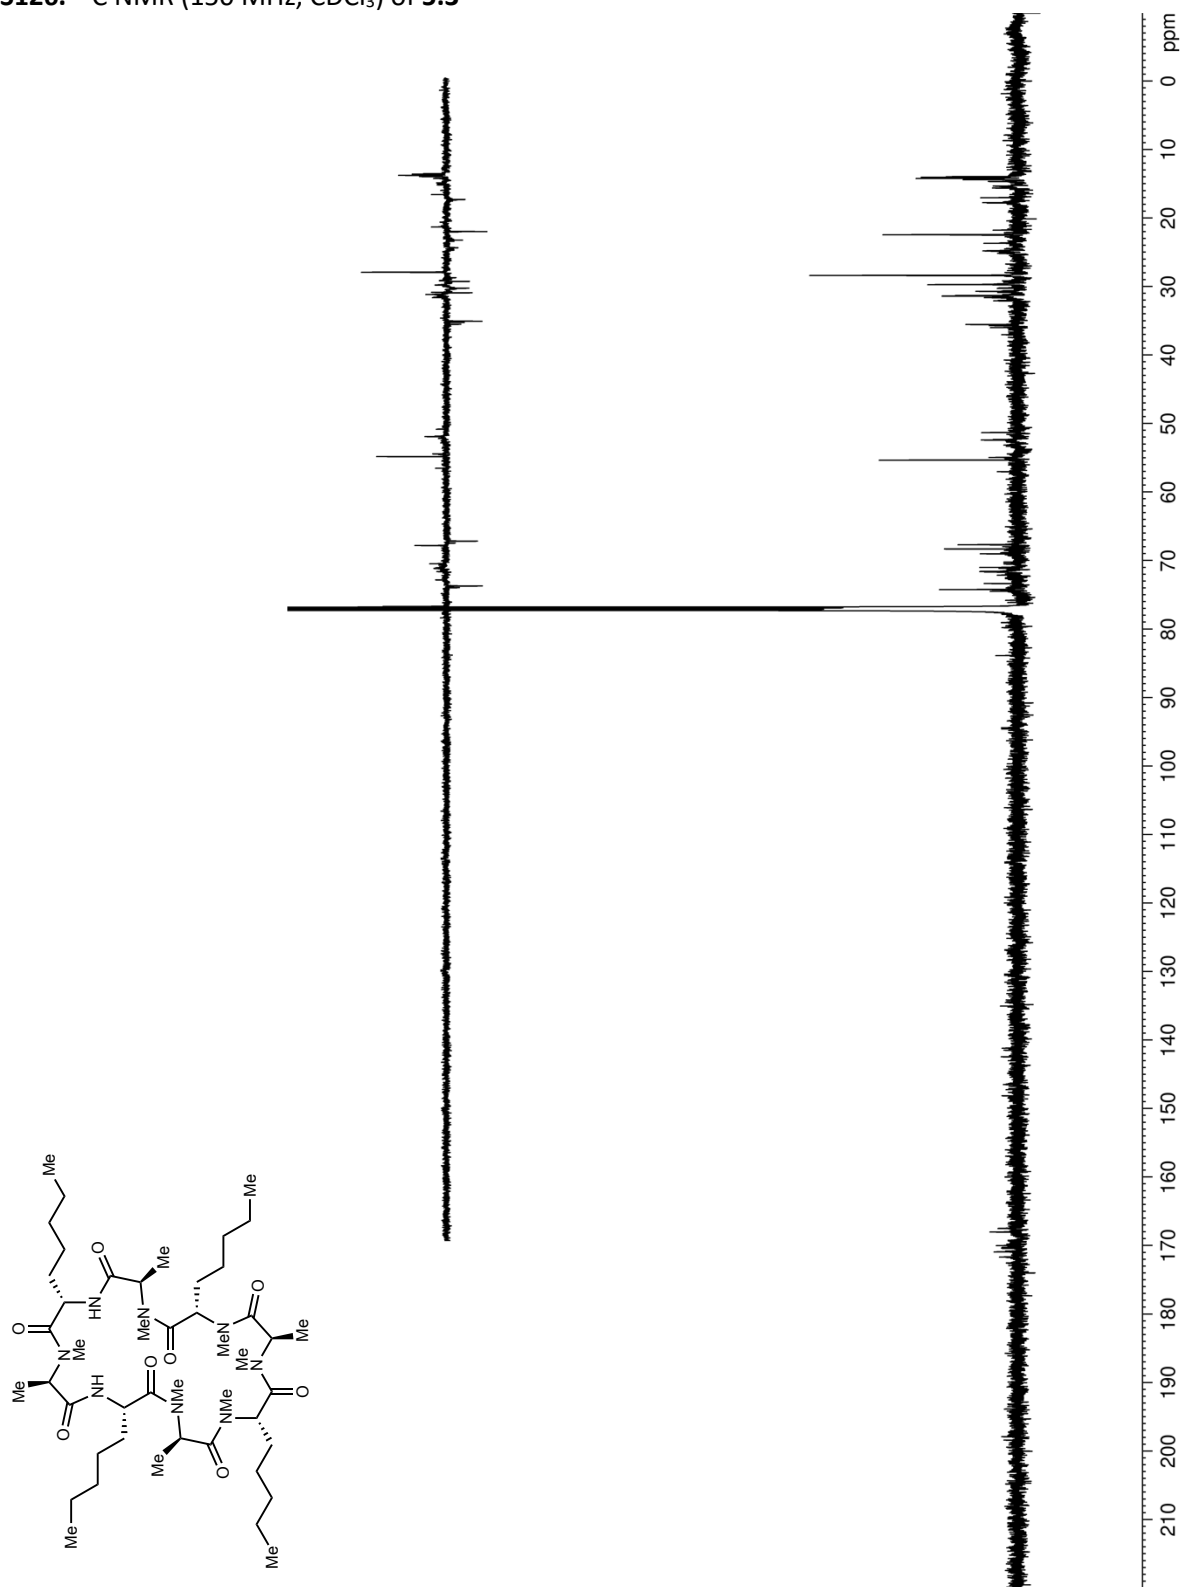

Figure S127.  $^1\text{H}$  NMR (600 MHz,  $\text{CDCl}_3$ ) of 5.4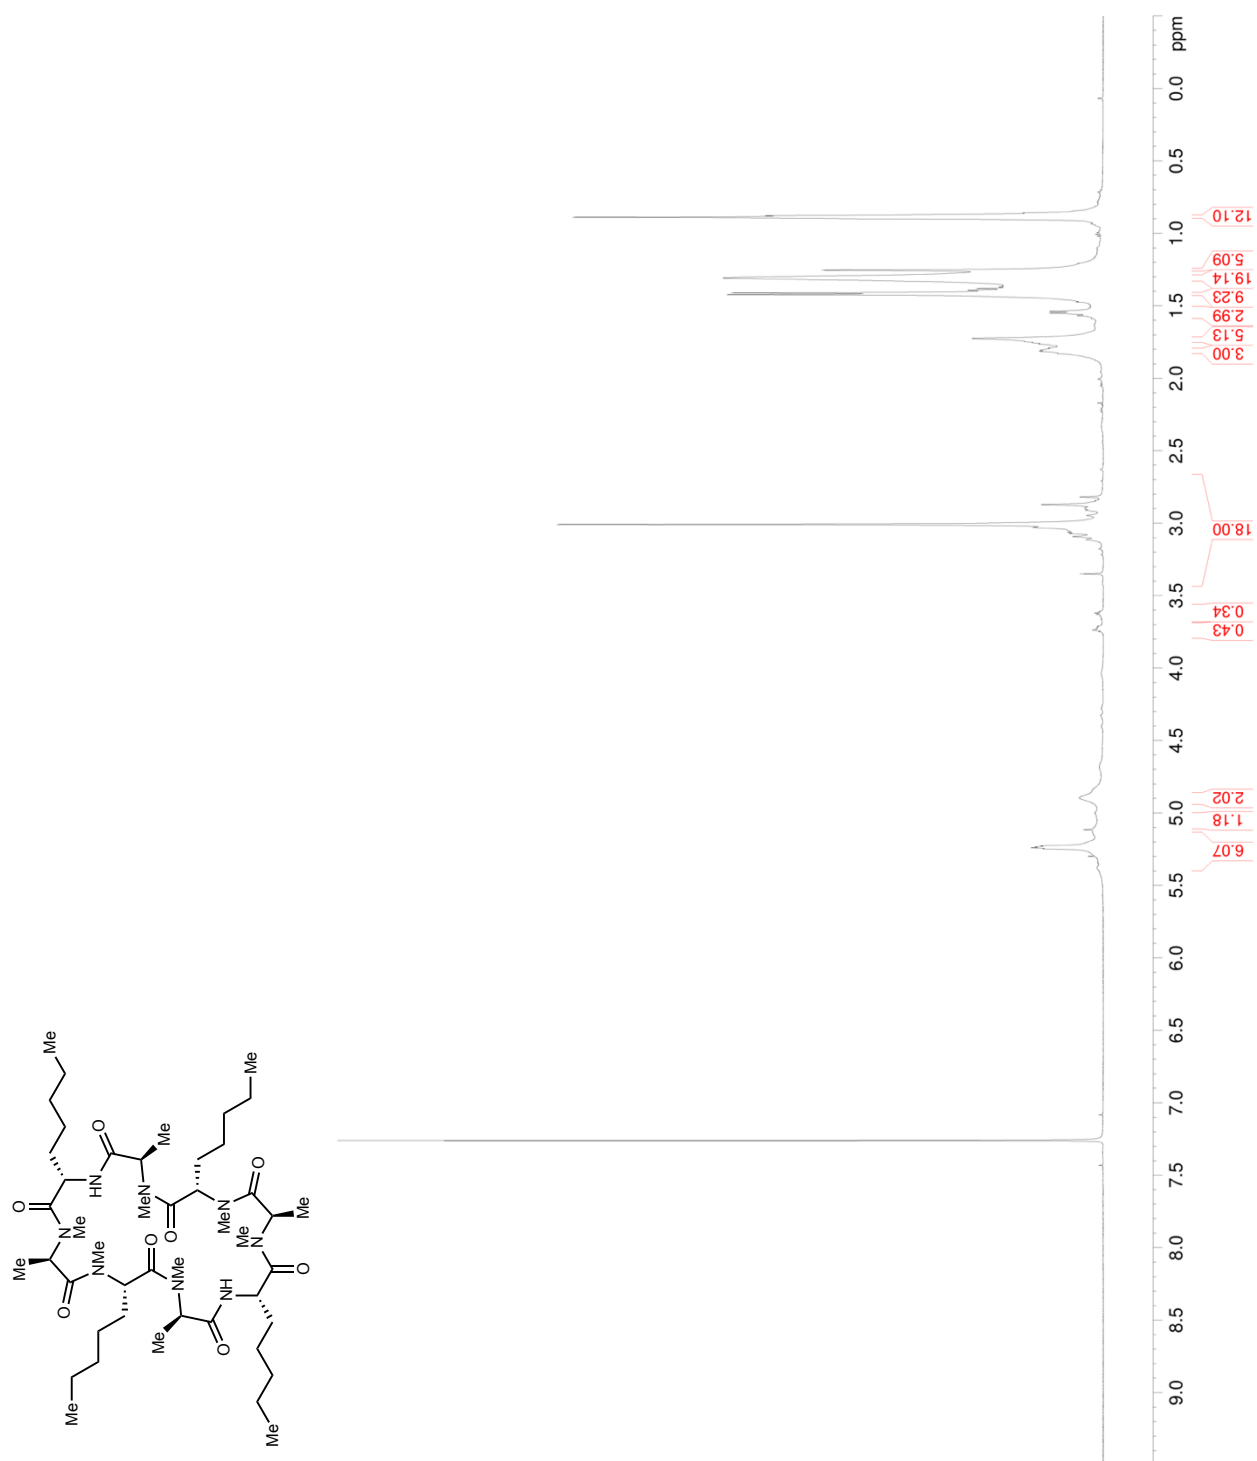

Figure S128.  $^{13}\text{C}$  NMR (150 MHz,  $\text{CDCl}_3$ ) of 5.4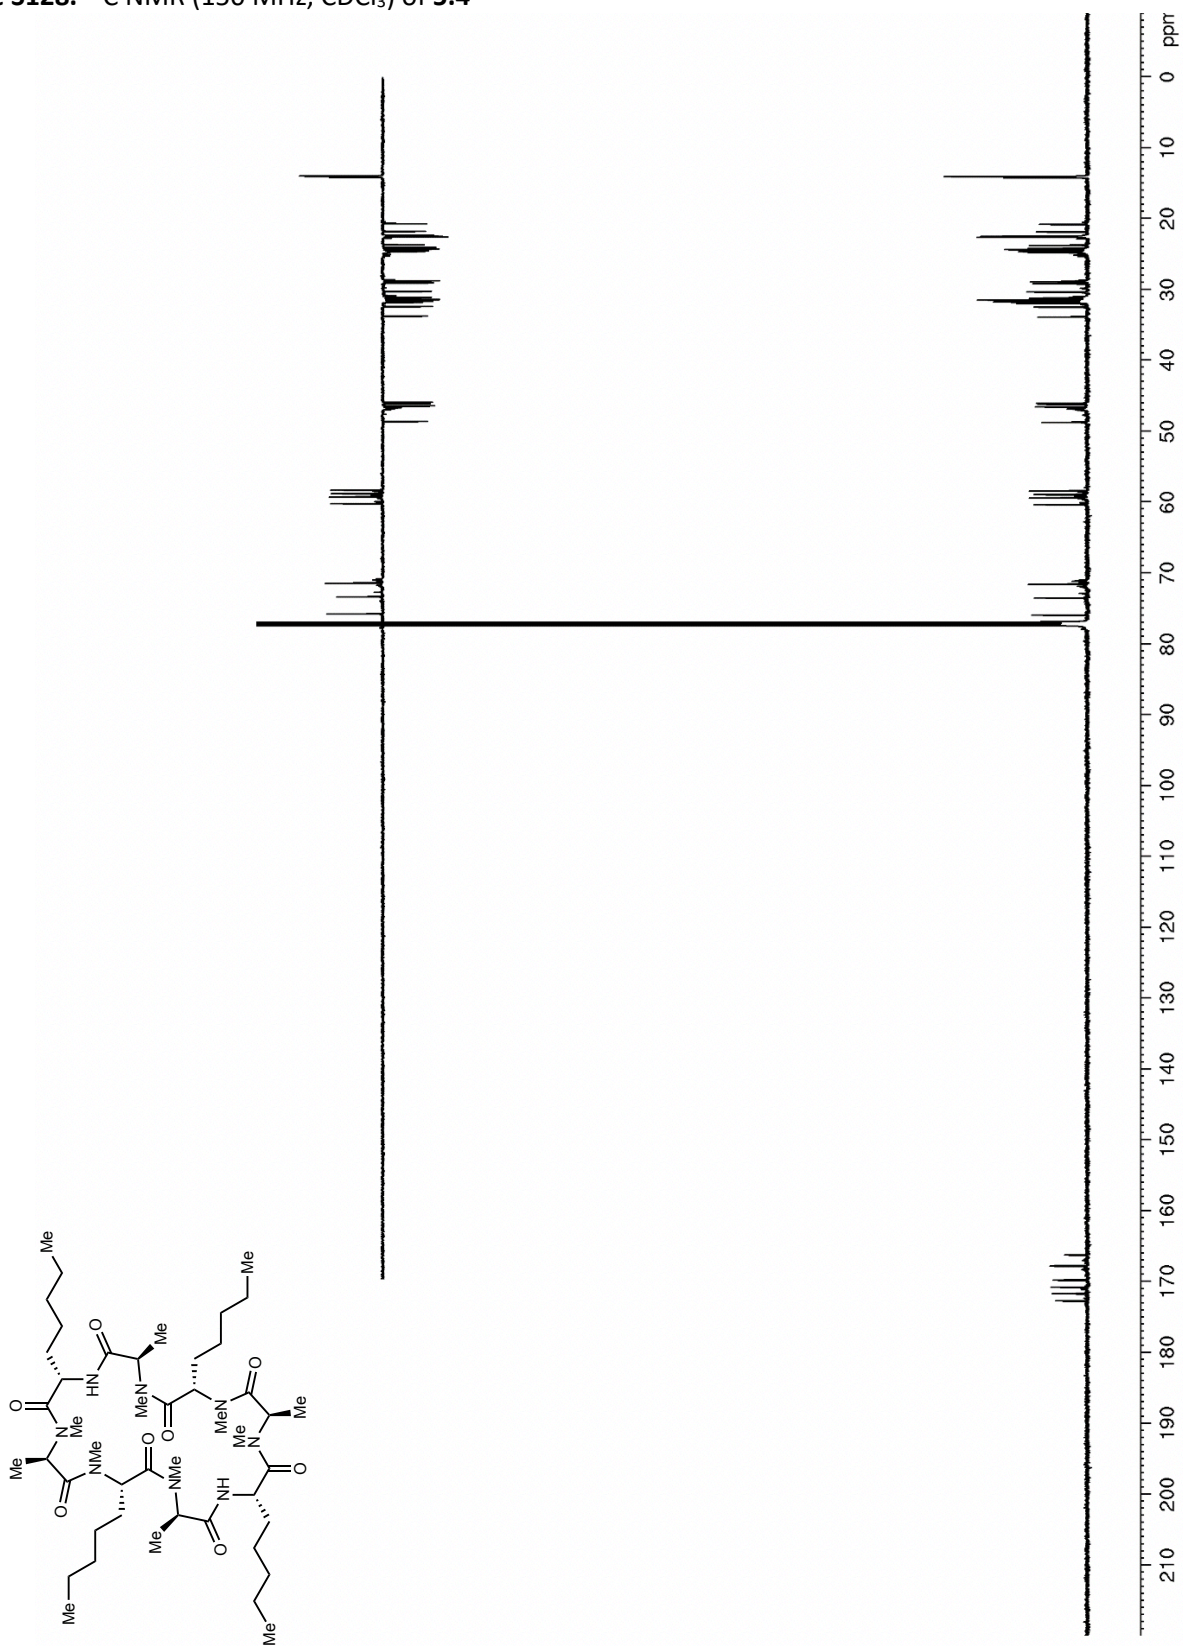



Figure S129.  $^1\text{H}$  NMR (600 MHz,  $\text{CDCl}_3$ ) of 5.5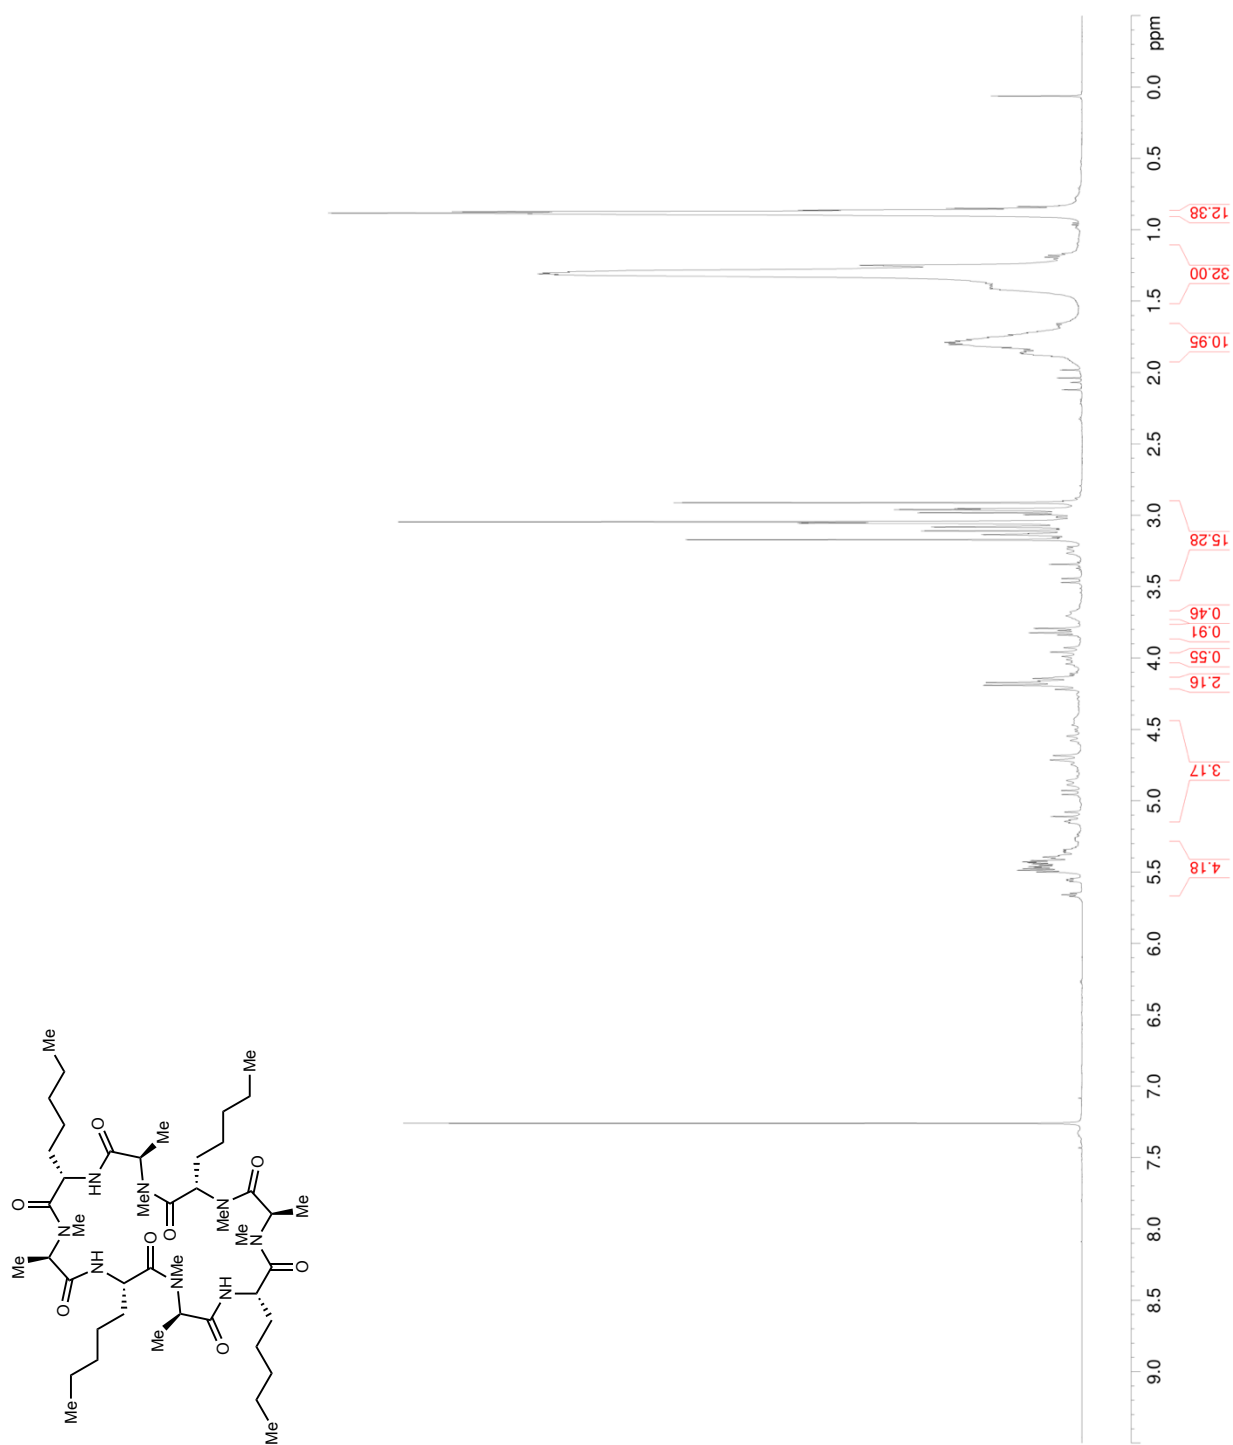

Supplement: jm4c00923_si_001.pdf [file jm4c00923_si_001.pdf]
